# Supplementary material for: Whole blood transcriptional profiles and the pathogenesis of tuberculous meningitis
Source: eLife. 2024 Oct 30;13:RP92344. doi: 10.7554/eLife.92344 (PMC11524586; doi:10.7554/eLife.92344)
Supplement: Supplementary file 1. [file elife-92344-supp1.xlsx]

## Sheet: S file 1A
Supplementary file 1A: Association between baseline clinical characteristics with TBM mortality in PCR validation cohort
Characteristics	n	Survival n=94	Death n=38	HR*	95% CI	p value*
Male sex	130	64 (70%)	20 (53%)	0.55	0.29, 1.05	0.068
Age (years)	132	42 (31, 58)	56 (44, 64)	1.03	1.01, 1.05	0.011
**Diagnostic category	107
definite TBM		31 (44%)	10 (27%)
possible TBM		12 (17%)	9 (24%)	1.77	0.72, 4.35	0.2
probable TBM		27 (39%)	18 (49%)	1.95	0.90, 4.23	0.090
***MRC grade	132
grade 1		37 (39%)	3 (7.9%)
grade 2		50 (53%)	26 (68%)	5.09	1.54, 16.8	0.008
grade 3		7 (7.4%)	9 (24%)	11.6	3.12, 42.8	<0.001
Blood (106 cells/ml)
Leukocyte count	129	9.9 (7.7, 12.5)	10.0 (7.8, 12.4)	1.37	0.71, 2.66	0.3
Neutrophil count	129	7.3 (5.5, 9.6)	7.5 (6.3, 10.3)	1.49	0.87, 2.55	0.2
Lymphocyte count	129	1.24 (0.73, 1.71)	1.13 (0.58, 1.84)	0.82	0.55, 1.23	0.4
CSF (103 cells/ml)
Leukocyte count	106	180 (85, 471)	39 (13, 116)	0.77	0.67, 0.88	<0.001
Neutrophil count	60	29 (7, 100)	4 (0, 43)	0.83	0.72, 0.95	0.009
Lymphocyte count	106	133 (60, 368)	32 (8, 93)	0.75	0.65, 0.86	<0.001
Values were displayed as median (1st and 3rd interquartile) for continuous variables and frequency (%) for categorical variables.
*Association of the corresponding variables with three-month mortality using a Cox regression model. Hazard ratio (HR) and p-value from the Cox regression model were presented in the table.
** Diagnostic categories were assigned according to the consensus case definition 18.
*** MRC grade denotes modified British Medical Research Council criteria 14.
TBM = tuberculous meningitis, CSF= cerebrospinal fluid

## Sheet: S file 1B
Supplementary file 1B – Summary of enrichment scores of known innate immunity pathways associated with TBM pathogenesis in 4 cohorts. Pathway enrichment scores were calculated using single sample GSEA algorithm (ssGSEA) (Barbie DA, et al 2009). Enrichment scores were represented as median(IQR). Pairwise comparison between 4 cohort were done by Wilcoxon rank sum test.
Gene set / Pathway	Healthy control N=30	PTB N=295	HIV-negative TBM N=207	HIV-positive TBM N=74	P value Healthy control vs. PTB	P value Healthy control vs. TBM	P value HIV-negative TBM vs. HIV-positive TBM
Inflammatory repsponse (n=230 genes)	0.745 (0.738, 0.754)	0.758 (0.747, 0.771)	0.751 (0.735, 0.767)	0.763 (0.749, 0.774)	<0.001	0.055	0.010
Inflammasomes (n=21 genes)	1.300 (1.288, 1.307)	1.316 (1.301, 1.328)	1.312 (1.299, 1.323)	1.320 (1.311, 1.331)	<0.001	<0.001	0.002
Cytokine signaling (n=702 genes)	0.924 (0.914, 0.929)	0.939 (0.930, 0.947)	0.926 (0.912, 0.938)	0.935 (0.924, 0.947)	<0.001	0.028	0.001
Icosanoid (n=125 genes)	0.461 (0.446, 0.475)	0.451 (0.432, 0.470)	0.454 (0.433, 0.475)	0.444 (0.427, 0.471)	0.049	0.10	0.088
Interferon signaling pathway (n=100 genes)	0.900 (0.886, 0.910)	0.929 (0.914, 0.948)	0.924 (0.908, 0.949)	0.975 (0.957, 0.988)	<0.001	<0.001	<0.001
TNF signaling (n=114 genes)	0.846 (0.834, 0.854)	0.853 (0.839, 0.867)	0.845 (0.830, 0.863)	0.884 (0.865, 0.895)	0.011	0.017	<0.001

## Sheet: S file 1C
Supplementary file 1C – Differential expression analysis for whole transcriptome between death (n=61) and survival (n=217) in TBM in the study. Positive log fold change (logFC) indicates higher expression, while negative logFC indicates lower expression in death TBM. Three cases were excluded from this analysis due to follow-up time were less than 3 months. Linear models were used to assess DEGs …
Gene symbol	Ensembl ID	Gene type	logFC	P.Value	adj.P.Val	B-statistic
AP003086.1	ENSG00000254420	lncRNA	1.06388	1.47557e-11	2.95114e-07	15.7954
BX640514.2	ENSG00000273812	lncRNA	0.830267	1.69772e-10	7.21907e-07	13.4817
CD28	ENSG00000178562	protein_coding	-1.03972	2.16572e-10	7.21907e-07	13.2514
FCAR	ENSG00000186431	protein_coding	0.896711	1.39357e-10	7.21907e-07	13.6686
MTF1	ENSG00000188786	protein_coding	0.624173	1.84995e-10	7.21907e-07	13.4005
OPLAH	ENSG00000178814	protein_coding	0.976706	1.93e-10	7.21907e-07	13.3604
EPHX2	ENSG00000120915	protein_coding	-0.780977	2.77337e-10	7.92391e-07	13.0174
KIF1B	ENSG00000054523	protein_coding	0.717572	4.66741e-10	9.33483e-07	12.5251
MCEMP1	ENSG00000183019	protein_coding	1.16643	4.30332e-10	9.33483e-07	12.6019
PLP2	ENSG00000102007	protein_coding	0.598219	4.53404e-10	9.33483e-07	12.5526
AC004918.5	ENSG00000270157	lncRNA	-0.665122	8.28693e-10	1.08149e-06	11.9825
AC105339.4	ENSG00000259707	processed_pseudogene	0.767479	6.54624e-10	1.08149e-06	12.2054
DPRXP2	ENSG00000271304	transcribed_processed_pseudogene	0.816606	7.52886e-10	1.08149e-06	12.0732
GPR150	ENSG00000178015	protein_coding	-0.626101	8.39634e-10	1.08149e-06	11.9701
NELL2	ENSG00000184613	protein_coding	-1.22238	6.57368e-10	1.08149e-06	12.2014
NMRAL2P	ENSG00000171658	transcribed_unprocessed_pseudogene	0.951837	8.6519e-10	1.08149e-06	11.9418
CD177	ENSG00000204936	protein_coding	2.14653	1.02012e-09	1.13347e-06	11.7862
SPATC1	ENSG00000186583	protein_coding	0.961323	1.01625e-09	1.13347e-06	11.7898
SPEF2	ENSG00000152582	protein_coding	-0.711181	1.24416e-09	1.18491e-06	11.5986
TBC1D4	ENSG00000136111	protein_coding	-0.750909	1.20408e-09	1.18491e-06	11.6295
TRAF5	ENSG00000082512	protein_coding	-0.673596	1.21564e-09	1.18491e-06	11.6205
SLC26A8	ENSG00000112053	protein_coding	0.925445	1.37225e-09	1.19789e-06	11.5061
Z95152.1	ENSG00000237719	processed_pseudogene	0.671399	1.37758e-09	1.19789e-06	11.5024
C21orf59-TCP10L	ENSG00000265590	protein_coding	-0.747617	1.50376e-09	1.23809e-06	11.4196
DDAH2	ENSG00000213722	protein_coding	0.663273	1.56235e-09	1.23809e-06	11.3835
SDR42E1P5	ENSG00000236785	processed_pseudogene	1.08815	1.60951e-09	1.23809e-06	11.3554
AC073115.2	ENSG00000237471	lncRNA	-0.697979	1.7431e-09	1.28001e-06	11.2801
NMT2	ENSG00000152465	protein_coding	-0.587348	1.79202e-09	1.28001e-06	11.254
TRBV29-1	ENSG00000232869	TR_V_gene	-0.883743	1.87943e-09	1.29616e-06	11.2091
AC005392.3	ENSG00000272396	lncRNA	1.00105	2.38047e-09	1.41069e-06	10.9859
AC009159.3	ENSG00000278058	lncRNA	-0.538217	2.46871e-09	1.41069e-06	10.9516
CYSTM1	ENSG00000120306	protein_coding	0.90132	2.14347e-09	1.41069e-06	11.0849
KLHL3	ENSG00000146021	protein_coding	-0.723232	2.42727e-09	1.41069e-06	10.9676
TNFRSF25	ENSG00000215788	protein_coding	-0.823279	2.3113e-09	1.41069e-06	11.0138
TRBV7-9	ENSG00000278030	TR_V_gene	-0.860493	2.29568e-09	1.41069e-06	11.0202
ACVR1B	ENSG00000135503	protein_coding	0.592604	2.60466e-09	1.44703e-06	10.901
SMPD5	ENSG00000204791	transcribed_unitary_pseudogene	0.964058	2.68892e-09	1.45347e-06	10.8709
AC093010.2	ENSG00000241490	lncRNA	-0.67947	2.76892e-09	1.45733e-06	10.8433
IL7R	ENSG00000168685	protein_coding	-0.85743	3.00594e-09	1.54151e-06	10.7658
DYRK2	ENSG00000127334	protein_coding	-0.688409	3.23242e-09	1.61621e-06	10.6972
MMP9	ENSG00000100985	protein_coding	1.23072	3.92942e-09	1.91545e-06	10.513
ZNF551	ENSG00000204519	protein_coding	-0.518366	4.02244e-09	1.91545e-06	10.4909
DENND11	ENSG00000257093	protein_coding	-0.617955	4.23571e-09	1.92532e-06	10.4422
TRAV3	ENSG00000211777	TR_V_gene	-0.793418	4.16197e-09	1.92532e-06	10.4588
AC008555.4	ENSG00000271109	lncRNA	-0.702782	4.88499e-09	1.96604e-06	10.3077
AC243960.1	ENSG00000268027	lncRNA	-0.721387	5.01487e-09	1.96604e-06	10.2829
LINC01550	ENSG00000246223	lncRNA	-0.878603	4.95718e-09	1.96604e-06	10.2938
RFTN1	ENSG00000131378	protein_coding	-0.515189	4.52557e-09	1.96604e-06	10.3797
RPL7P12	ENSG00000227770	processed_pseudogene	0.676942	4.47825e-09	1.96604e-06	10.3897
TDRD9	ENSG00000156414	protein_coding	0.975897	5.11169e-09	1.96604e-06	10.2649
TRBJ2-1	ENSG00000211764	TR_J_gene	-0.618248	4.85939e-09	1.96604e-06	10.3126
ZNF548	ENSG00000188785	protein_coding	-0.548801	4.85899e-09	1.96604e-06	10.3127
CENPV	ENSG00000166582	protein_coding	-0.585091	5.4102e-09	1.96734e-06	10.2114
DPP4	ENSG00000197635	protein_coding	-0.877813	5.39234e-09	1.96734e-06	10.2145
EXOSC4	ENSG00000178896	protein_coding	0.559522	5.33568e-09	1.96734e-06	10.2244
CD96	ENSG00000153283	protein_coding	-0.788576	5.88268e-09	2.10096e-06	10.1324
MID2	ENSG00000080561	protein_coding	-0.764873	6.19593e-09	2.14247e-06	10.0835
UBASH3A	ENSG00000160185	protein_coding	-0.804632	6.21317e-09	2.14247e-06	10.0809
NR3C2	ENSG00000151623	protein_coding	-0.858429	6.38081e-09	2.15639e-06	10.0558
TC2N	ENSG00000165929	protein_coding	-0.799287	6.46917e-09	2.15639e-06	10.0428
KLRB1	ENSG00000111796	protein_coding	-0.847975	7.12701e-09	2.29993e-06	9.9515
TMEM204	ENSG00000131634	protein_coding	-0.824479	7.12978e-09	2.29993e-06	9.95114
LEF1	ENSG00000138795	protein_coding	-0.943044	7.61217e-09	2.41656e-06	9.88942
DST	ENSG00000151914	protein_coding	-0.595692	8.10593e-09	2.45634e-06	9.83019
SPOCK2	ENSG00000107742	protein_coding	-0.708596	8.05323e-09	2.45634e-06	9.83633
TRABD2A	ENSG00000186854	protein_coding	-0.924856	8.05025e-09	2.45634e-06	9.83668
ATP6V0E2	ENSG00000171130	protein_coding	-0.587505	8.75662e-09	2.55565e-06	9.75741
FGF14-AS2	ENSG00000272143	lncRNA	-0.520633	9.04534e-09	2.55565e-06	9.72684
SIGLEC5	ENSG00000105501	protein_coding	0.749767	8.72137e-09	2.55565e-06	9.76121
TESPA1	ENSG00000135426	protein_coding	-0.740652	9.07256e-09	2.55565e-06	9.72401
TRBV5-6	ENSG00000211728	TR_V_gene	-0.727435	8.87659e-09	2.55565e-06	9.74459
MKNK1-AS1	ENSG00000269956	lncRNA	0.650986	9.28913e-09	2.58031e-06	9.70178
BCL11B	ENSG00000127152	protein_coding	-0.794318	9.75149e-09	2.67164e-06	9.656
ZNF287	ENSG00000141040	protein_coding	-0.642153	1.00811e-08	2.72462e-06	9.62468
AGFG1	ENSG00000173744	protein_coding	0.524731	1.0609e-08	2.72662e-06	9.57658
GYG1	ENSG00000163754	protein_coding	0.759055	1.06338e-08	2.72662e-06	9.57439
PFKFB3	ENSG00000170525	protein_coding	0.916905	1.04991e-08	2.72662e-06	9.5864
RHOG	ENSG00000177105	protein_coding	0.551885	1.05288e-08	2.72662e-06	9.58374
AC073857.1	ENSG00000280120	TEC	-0.520989	1.08809e-08	2.73577e-06	9.55274
CKAP4	ENSG00000136026	protein_coding	0.710653	1.09431e-08	2.73577e-06	9.54738
ZNF599	ENSG00000153896	protein_coding	-0.473187	1.10834e-08	2.73665e-06	9.53537
FLOT1	ENSG00000137312	protein_coding	0.660326	1.19227e-08	2.77465e-06	9.4666
HABP4	ENSG00000130956	protein_coding	-0.542711	1.17073e-08	2.77465e-06	9.48378
MKNK1	ENSG00000079277	protein_coding	0.616741	1.17364e-08	2.77465e-06	9.48144
TP53I3	ENSG00000115129	protein_coding	0.497155	1.1931e-08	2.77465e-06	9.46595
TRBJ2-5	ENSG00000211769	TR_J_gene	-0.577806	1.16732e-08	2.77465e-06	9.48652
AC092916.2	ENSG00000240787	processed_pseudogene	-0.677539	1.27185e-08	2.86269e-06	9.40573
CAMK4	ENSG00000152495	protein_coding	-0.899012	1.27943e-08	2.86269e-06	9.40014
IGFBP3	ENSG00000146674	protein_coding	-0.740531	1.29632e-08	2.86269e-06	9.38779
PGD	ENSG00000142657	protein_coding	0.659592	1.30252e-08	2.86269e-06	9.38329
SLC4A7	ENSG00000033867	protein_coding	-0.604678	1.29472e-08	2.86269e-06	9.38894
AL445524.1	ENSG00000233461	lncRNA	0.730213	1.36328e-08	2.96365e-06	9.34035
AL133517.1	ENSG00000232450	transcribed_processed_pseudogene	0.666989	1.45946e-08	3.12261e-06	9.27614
PAIP2B	ENSG00000124374	protein_coding	-0.652106	1.46763e-08	3.12261e-06	9.27088
NOP53	ENSG00000105373	protein_coding	-0.500517	1.5183e-08	3.19643e-06	9.23891
TMSB15B-AS1	ENSG00000231728	lncRNA	-0.519101	1.57748e-08	3.28642e-06	9.2029
CCNG1P1	ENSG00000218991	processed_pseudogene	1.08629	1.68581e-08	3.41342e-06	9.14037
GPR84	ENSG00000139572	protein_coding	1.07164	1.68964e-08	3.41342e-06	9.13823
SAMSN1	ENSG00000155307	protein_coding	0.833365	1.6569e-08	3.41342e-06	9.15665
ZNF793	ENSG00000188227	protein_coding	-0.675494	1.73196e-08	3.46392e-06	9.11493
AC135626.1	ENSG00000258632	processed_pseudogene	0.693754	1.79159e-08	3.47882e-06	9.08306
ARL8A	ENSG00000143862	protein_coding	0.501648	1.78717e-08	3.47882e-06	9.08539
GVQW3	ENSG00000179240	protein_coding	-0.498488	1.78469e-08	3.47882e-06	9.0867
FAM24B	ENSG00000213185	protein_coding	-0.513892	1.93012e-08	3.60993e-06	9.01294
HK3	ENSG00000160883	protein_coding	0.671302	1.96741e-08	3.60993e-06	8.99493
NAIP	ENSG00000249437	protein_coding	0.805028	1.89243e-08	3.60993e-06	9.03151
SATB1-AS1	ENSG00000228956	lncRNA	-0.831254	1.96313e-08	3.60993e-06	8.99698
TLR5	ENSG00000187554	protein_coding	0.812707	1.92942e-08	3.60993e-06	9.01329
TRAJ26	ENSG00000211863	TR_J_gene	-0.735382	1.96094e-08	3.60993e-06	8.99803
AC009303.4	ENSG00000279227	TEC	0.580359	2.02474e-08	3.63074e-06	8.96789
AC009560.4	ENSG00000287508	lncRNA	-0.71222	2.10368e-08	3.63074e-06	8.93189
AL359220.1	ENSG00000247287	lncRNA	-0.702012	1.9985e-08	3.63074e-06	8.98017
BCKDHB	ENSG00000083123	protein_coding	-0.576446	2.09673e-08	3.63074e-06	8.935
MAPK14	ENSG00000112062	protein_coding	0.691214	2.06137e-08	3.63074e-06	8.95101
TMEM169	ENSG00000163449	protein_coding	0.516419	2.10583e-08	3.63074e-06	8.93093
UPP1	ENSG00000183696	protein_coding	0.685041	2.08781e-08	3.63074e-06	8.93902
CARD6	ENSG00000132357	protein_coding	0.49441	2.1823e-08	3.72858e-06	8.89735
FCGBP	ENSG00000275395	protein_coding	-0.898343	2.19986e-08	3.72858e-06	8.88981
TARBP1	ENSG00000059588	protein_coding	-0.540667	2.22358e-08	3.7371e-06	8.87972
AP3B2	ENSG00000103723	protein_coding	1.17583	2.30909e-08	3.79588e-06	8.8442
LINC00861	ENSG00000245164	lncRNA	-0.809154	2.31549e-08	3.79588e-06	8.84159
ZNF549	ENSG00000121406	protein_coding	-0.53143	2.29522e-08	3.79588e-06	8.84987
CR1	ENSG00000203710	protein_coding	0.816837	2.51979e-08	4.03167e-06	8.76202
INPP4B	ENSG00000109452	protein_coding	-0.896989	2.50852e-08	4.03167e-06	8.76624
NACAP8	ENSG00000257210	processed_pseudogene	0.662385	2.51031e-08	4.03167e-06	8.76557
RASGRP1	ENSG00000172575	protein_coding	-0.657961	2.57513e-08	4.08751e-06	8.74157
ZNF30	ENSG00000168661	protein_coding	-0.605547	2.59875e-08	4.09252e-06	8.73298
GK3P	ENSG00000229894	protein_coding	0.690093	2.66656e-08	4.14178e-06	8.70875
ITK	ENSG00000113263	protein_coding	-0.718937	2.67145e-08	4.14178e-06	8.70702
NFIL3	ENSG00000165030	protein_coding	0.656292	2.70144e-08	4.15606e-06	8.69652
FCER1G	ENSG00000158869	protein_coding	0.717187	2.77371e-08	4.23467e-06	8.67168
GRAP	ENSG00000154016	protein_coding	-0.570113	2.8772e-08	4.32662e-06	8.63721
ZNF550	ENSG00000251369	protein_coding	-0.529056	2.86074e-08	4.32662e-06	8.64261
PNPLA1	ENSG00000180316	protein_coding	0.785882	2.95526e-08	4.41084e-06	8.61202
NUBPL	ENSG00000151413	protein_coding	-0.50546	2.99452e-08	4.43633e-06	8.59961
GCNT4	ENSG00000176928	protein_coding	-0.913829	3.06177e-08	4.50261e-06	8.57871
C2CD4D-AS1	ENSG00000234614	lncRNA	-0.633816	3.14827e-08	4.56271e-06	8.5525
TMSB15B	ENSG00000269226	protein_coding	-0.5424	3.14642e-08	4.56271e-06	8.55306
TMSB15B	ENSG00000158427	protein_coding	-0.5424	3.14642e-08	4.56271e-06	8.55306
RASGRF2	ENSG00000113319	protein_coding	-0.774489	3.18577e-08	4.58385e-06	8.54136
FBLN5	ENSG00000140092	protein_coding	-0.69859	3.2839e-08	4.66145e-06	8.51283
RD3L	ENSG00000227729	protein_coding	0.776583	3.28632e-08	4.66145e-06	8.51213
AL359532.1	ENSG00000272914	lncRNA	0.656365	3.37327e-08	4.72179e-06	8.48757
WNT10B	ENSG00000169884	protein_coding	-0.611873	3.37608e-08	4.72179e-06	8.48679
AC103563.7	ENSG00000233850	lncRNA	-0.787286	3.39972e-08	4.72183e-06	8.48022
IL1R2	ENSG00000115590	protein_coding	1.25384	3.5731e-08	4.92841e-06	8.43344
AL021368.2	ENSG00000272316	lncRNA	-0.569377	3.60508e-08	4.93847e-06	8.42506
MRPS31P5	ENSG00000243406	transcribed_unprocessed_pseudogene	-0.475767	3.63006e-08	4.93885e-06	8.41856
RORA	ENSG00000069667	protein_coding	-0.769546	3.66307e-08	4.95009e-06	8.41005
ALOX5AP	ENSG00000132965	protein_coding	0.770857	3.69623e-08	4.96138e-06	8.40158
LINC002481	ENSG00000246526	lncRNA	-0.626232	3.755e-08	5.00666e-06	8.38674
AC093323.1	ENSG00000170846	protein_coding	-0.558517	3.92497e-08	5.19864e-06	8.34511
LAMB3	ENSG00000196878	protein_coding	0.590602	3.96902e-08	5.2224e-06	8.33461
TRAJ24	ENSG00000211865	TR_J_gene	-0.716564	4.08383e-08	5.33835e-06	8.30779
ASTN2	ENSG00000148219	protein_coding	-0.560181	4.1801e-08	5.37149e-06	8.28589
GOLGA7B	ENSG00000155265	protein_coding	-0.649441	4.1734e-08	5.37149e-06	8.28739
N6AMT1	ENSG00000156239	protein_coding	-0.563648	4.18976e-08	5.37149e-06	8.28371
LILRA5	ENSG00000187116	protein_coding	0.762642	4.28154e-08	5.45419e-06	8.26334
AC006299.1	ENSG00000246225	lncRNA	-0.571825	4.3813e-08	5.54595e-06	8.24168
AC074008.1	ENSG00000284902	lncRNA	-0.512473	4.50858e-08	5.60959e-06	8.21476
RBMS1P1	ENSG00000225422	processed_pseudogene	0.811105	4.57181e-08	5.60959e-06	8.20166
RPL22	ENSG00000116251	protein_coding	-0.506487	4.47823e-08	5.60959e-06	8.22111
SYDE2	ENSG00000097096	protein_coding	-0.673273	4.5681e-08	5.60959e-06	8.20243
ZNF573	ENSG00000189144	protein_coding	-0.491403	4.52665e-08	5.60959e-06	8.211
TRBV12-3	ENSG00000274752	TR_V_gene	-0.661073	4.6025e-08	5.6128e-06	8.19538
LRIG1	ENSG00000144749	protein_coding	-0.514144	4.657e-08	5.64485e-06	8.18431
CNIH4	ENSG00000143771	protein_coding	0.501271	4.76194e-08	5.73728e-06	8.16336
FTLP15	ENSG00000233952	processed_pseudogene	-0.601109	4.95986e-08	5.93996e-06	8.12508
TIAM1	ENSG00000156299	protein_coding	-0.566122	5.12469e-08	6.10083e-06	8.09434
PPP1R3D	ENSG00000132825	protein_coding	0.536796	5.26367e-08	6.2292e-06	8.06919
ANTXRLP1	ENSG00000263482	unprocessed_pseudogene	-0.730363	5.42967e-08	6.25544e-06	8.04001
CCR7	ENSG00000126353	protein_coding	-0.872029	5.42383e-08	6.25544e-06	8.04102
P2RY10	ENSG00000078589	protein_coding	-0.777501	5.31783e-08	6.25544e-06	8.05957
PLCG1	ENSG00000124181	protein_coding	-0.681904	5.44224e-08	6.25544e-06	8.03784
S100A6	ENSG00000197956	protein_coding	0.468109	5.35825e-08	6.25544e-06	8.05245
ZNF438	ENSG00000183621	protein_coding	0.658846	5.48956e-08	6.27378e-06	8.0297
NCF4	ENSG00000100365	protein_coding	0.60433	5.56697e-08	6.3261e-06	8.01654
LRG1	ENSG00000171236	protein_coding	0.849663	5.64655e-08	6.38029e-06	8.0032
AC011416.3	ENSG00000283897	lncRNA	-0.52293	5.72425e-08	6.43175e-06	7.99035
KDM2B-DT	ENSG00000256742	lncRNA	-0.496792	5.77247e-08	6.44968e-06	7.98247
CNGA4	ENSG00000132259	protein_coding	0.531764	5.85228e-08	6.50254e-06	7.96956
AC079760.2	ENSG00000243144	lncRNA	0.886056	5.94404e-08	6.53459e-06	7.95494
OR52W1	ENSG00000175485	protein_coding	0.597229	5.94648e-08	6.53459e-06	7.95456
GADD45A	ENSG00000116717	protein_coding	0.790265	6.01602e-08	6.57488e-06	7.94363
CDKN2D	ENSG00000129355	protein_coding	0.552672	6.1374e-08	6.67108e-06	7.92486
CA4	ENSG00000167434	protein_coding	0.888924	6.20817e-08	6.71153e-06	7.91409
THEM5	ENSG00000196407	protein_coding	-0.614022	6.33199e-08	6.80859e-06	7.89553
AC245884.11	ENSG00000275210	lncRNA	0.71149	6.41535e-08	6.86134e-06	7.88324
G0S2	ENSG00000123689	protein_coding	1.20742	6.55392e-08	6.89887e-06	7.86316
SDHAP3	ENSG00000185986	transcribed_unprocessed_pseudogene	-0.536576	6.52971e-08	6.89887e-06	7.86664
TRAV16	ENSG00000211796	TR_V_gene	-0.673393	6.53016e-08	6.89887e-06	7.86657
APBB1IP	ENSG00000077420	protein_coding	0.512442	6.89085e-08	7.21555e-06	7.81606
CD40LG	ENSG00000102245	protein_coding	-0.562291	7.09198e-08	7.38748e-06	7.78903
DHRS3	ENSG00000162496	protein_coding	-0.556034	7.13363e-08	7.39236e-06	7.78353
PLEKHA1	ENSG00000107679	protein_coding	-0.609678	7.19488e-08	7.4174e-06	7.7755
AC008555.2	ENSG00000269086	lncRNA	-0.747502	7.27027e-08	7.45669e-06	7.76571
KLF12	ENSG00000118922	protein_coding	-0.720883	7.42731e-08	7.57889e-06	7.74563
PLIN3	ENSG00000105355	protein_coding	0.525888	7.51988e-08	7.6344e-06	7.73399
SCML1	ENSG00000047634	protein_coding	-0.549591	7.60395e-08	7.64216e-06	7.72355
SNHG14	ENSG00000224078	lncRNA	-0.553849	7.59401e-08	7.64216e-06	7.72478
CPEB4	ENSG00000113742	protein_coding	0.510965	7.64357e-08	7.64357e-06	7.71867
AC084871.4	ENSG00000286256	lncRNA	0.837874	7.73975e-08	7.70125e-06	7.70692
AXIN2	ENSG00000168646	protein_coding	-0.719764	7.87562e-08	7.7212e-06	7.69058
PFKFB2	ENSG00000123836	protein_coding	0.974925	7.87e-08	7.7212e-06	7.69125
TNFAIP8L3	ENSG00000183578	protein_coding	0.838327	7.8359e-08	7.7212e-06	7.69533
SH3YL1	ENSG00000035115	protein_coding	-0.503807	8.14429e-08	7.94565e-06	7.65907
CTSF	ENSG00000174080	protein_coding	-0.575647	8.2696e-08	8.01132e-06	7.64473
TRBC2	ENSG00000211772	TR_C_gene	-0.739495	8.33177e-08	8.01132e-06	7.63769
TRBJ1-4	ENSG00000281958	TR_J_gene	-0.663782	8.3064e-08	8.01132e-06	7.64056
DUSP13	ENSG00000079393	protein_coding	0.891293	8.37704e-08	8.01631e-06	7.6326
OSM	ENSG00000099985	protein_coding	0.821496	8.44579e-08	8.04361e-06	7.62493
LTB4R	ENSG00000213903	protein_coding	0.611401	8.68463e-08	8.22012e-06	7.59874
STMN3	ENSG00000197457	protein_coding	-0.518628	8.71332e-08	8.22012e-06	7.59564
C3orf18	ENSG00000088543	protein_coding	-0.5262	8.81757e-08	8.2794e-06	7.58447
MTMR3	ENSG00000100330	protein_coding	0.485677	8.86389e-08	8.28401e-06	7.57955
RALGAPA2	ENSG00000188559	protein_coding	0.574904	8.92644e-08	8.30367e-06	7.57295
CEBPB	ENSG00000172216	protein_coding	0.614127	9.04283e-08	8.30576e-06	7.56078
FPR1	ENSG00000171051	protein_coding	0.678436	8.99377e-08	8.30576e-06	7.56589
ZNF354C	ENSG00000177932	protein_coding	-0.604726	9.05328e-08	8.30576e-06	7.5597
GRB10	ENSG00000106070	protein_coding	0.963038	9.23285e-08	8.43183e-06	7.54125
ACVR2B	ENSG00000114739	protein_coding	-0.584022	9.42466e-08	8.56787e-06	7.52195
VASP	ENSG00000125753	protein_coding	0.500513	9.47218e-08	8.57211e-06	7.51722
AC243960.7	ENSG00000280014	TEC	-0.628562	9.60643e-08	8.65444e-06	7.50401
WDFY3	ENSG00000163625	protein_coding	0.632483	9.69501e-08	8.69508e-06	7.49539
CCL28	ENSG00000151882	protein_coding	-0.547795	9.79577e-08	8.74621e-06	7.48568
TRBV7-3	ENSG00000211714	TR_V_gene	-0.61495	9.83948e-08	8.74621e-06	7.4815
RRP15	ENSG00000067533	protein_coding	-0.51102	9.99429e-08	8.83625e-06	7.46684
ZNF483	ENSG00000173258	protein_coding	-0.687654	1.00291e-07	8.83625e-06	7.46357
AC084871.1	ENSG00000249138	transcribed_processed_pseudogene	0.77411	1.01377e-07	8.85387e-06	7.45347
SRPK1	ENSG00000096063	protein_coding	0.614576	1.01287e-07	8.85387e-06	7.4543
OXNAD1	ENSG00000154814	protein_coding	-0.612237	1.01845e-07	8.85611e-06	7.44914
RLN1	ENSG00000107018	protein_coding	-0.577118	1.04275e-07	9.02814e-06	7.427
CNKSR2	ENSG00000149970	protein_coding	-0.783855	1.08207e-07	9.28812e-06	7.39226
TRAJ27	ENSG00000211862	TR_J_gene	-0.70033	1.07793e-07	9.28812e-06	7.39586
CSGALNACT2	ENSG00000169826	protein_coding	0.553902	1.09241e-07	9.31748e-06	7.38333
TRIM25	ENSG00000121060	protein_coding	0.601842	1.0948e-07	9.31748e-06	7.38127
IMMP2L	ENSG00000184903	protein_coding	-0.54567	1.12071e-07	9.39801e-06	7.35932
IRAK3	ENSG00000090376	protein_coding	0.751187	1.12306e-07	9.39801e-06	7.35735
MDFIC	ENSG00000135272	protein_coding	-0.516609	1.11919e-07	9.39801e-06	7.36059
NOG	ENSG00000183691	protein_coding	-0.947527	1.11198e-07	9.39801e-06	7.36666
TMIGD2	ENSG00000167664	protein_coding	-0.638807	1.13706e-07	9.47551e-06	7.34572
ZXDA	ENSG00000198205	protein_coding	-0.476136	1.14562e-07	9.5072e-06	7.33869
TRBV10-3	ENSG00000275791	TR_V_gene	-0.726155	1.15819e-07	9.57181e-06	7.32844
ABLIM1	ENSG00000099204	protein_coding	-0.618239	1.17839e-07	9.69869e-06	7.31221
AC079848.1	ENSG00000250012	lncRNA	-0.505507	1.241e-07	1.01431e-05	7.26363
AL139424.2	ENSG00000284642	lncRNA	0.55411	1.24253e-07	1.01431e-05	7.26247
CD247	ENSG00000198821	protein_coding	-0.672049	1.25834e-07	1.01479e-05	7.2506
CST7	ENSG00000077984	protein_coding	0.812894	1.25574e-07	1.01479e-05	7.25254
MIR4772	ENSG00000264764	miRNA	0.923483	1.25551e-07	1.01479e-05	7.25272
HP	ENSG00000257017	protein_coding	1.18136	1.28366e-07	1.03105e-05	7.2319
AC138123.1	ENSG00000257322	lncRNA	0.687032	1.31056e-07	1.03146e-05	7.21244
ETS1	ENSG00000134954	protein_coding	-0.589529	1.32027e-07	1.03146e-05	7.20551
SEPTIN1	ENSG00000180096	protein_coding	-0.508297	1.31992e-07	1.03146e-05	7.20576
SNHG4	ENSG00000281398	lncRNA	-0.486198	1.29931e-07	1.03146e-05	7.22053
TBC1D19	ENSG00000109680	protein_coding	-0.616872	1.30469e-07	1.03146e-05	7.21665
TRIM32	ENSG00000119401	protein_coding	-0.582321	1.31573e-07	1.03146e-05	7.20875
ZNF485	ENSG00000198298	protein_coding	-0.496302	1.2912e-07	1.03146e-05	7.22641
AC007278.2	ENSG00000236525	lncRNA	1.04647	1.33165e-07	1.0363e-05	7.19746
CLRN1	ENSG00000163646	protein_coding	1.15653	1.35335e-07	1.04104e-05	7.18229
MTCO3P23	ENSG00000259651	processed_pseudogene	0.744751	1.35168e-07	1.04104e-05	7.18345
ZFP37	ENSG00000136866	protein_coding	-0.624059	1.35013e-07	1.04104e-05	7.18453
CLUAP1	ENSG00000103351	protein_coding	-0.489197	1.35995e-07	1.0421e-05	7.17773
PCNX2	ENSG00000135749	protein_coding	-0.543673	1.41046e-07	1.07668e-05	7.14351
AC138123.2	ENSG00000257746	lncRNA	0.700912	1.43101e-07	1.08822e-05	7.12994
GPR141	ENSG00000187037	protein_coding	0.589548	1.43746e-07	1.08898e-05	7.12572
MAP2K6	ENSG00000108984	protein_coding	0.655392	1.4429e-07	1.08898e-05	7.12217
CACNA1E	ENSG00000198216	protein_coding	0.899653	1.44923e-07	1.08965e-05	7.11807
GUCY2C	ENSG00000070019	protein_coding	0.667927	1.49747e-07	1.11752e-05	7.08734
IFITM2	ENSG00000185201	protein_coding	0.737843	1.49223e-07	1.11752e-05	7.09063
AL137789.1	ENSG00000236911	lncRNA	0.802838	1.51146e-07	1.11867e-05	7.07862
CAMKK2	ENSG00000110931	protein_coding	0.551569	1.52139e-07	1.11867e-05	7.07248
LINC01891	ENSG00000231682	lncRNA	-0.66917	1.51942e-07	1.11867e-05	7.0737
SLC51A	ENSG00000163959	protein_coding	0.538052	1.50726e-07	1.11867e-05	7.08123
ZNF530	ENSG00000183647	protein_coding	-0.449584	1.52756e-07	1.11909e-05	7.06868
C3orf86	ENSG00000225873	transcribed_unitary_pseudogene	0.807933	1.56566e-07	1.12234e-05	7.04557
DISC1	ENSG00000162946	protein_coding	0.497934	1.56486e-07	1.12234e-05	7.04605
NFKBIA	ENSG00000100906	protein_coding	0.594534	1.55365e-07	1.12234e-05	7.05279
SEMA6B	ENSG00000167680	protein_coding	0.715846	1.55421e-07	1.12234e-05	7.05245
TRAJ38	ENSG00000211851	TR_J_gene	-0.726764	1.54622e-07	1.12234e-05	7.05729
ZNF84	ENSG00000198040	protein_coding	-0.517156	1.55619e-07	1.12234e-05	7.05126
AC005332.4	ENSG00000274712	lncRNA	-0.499719	1.5854e-07	1.12616e-05	7.03381
ATP8B2	ENSG00000143515	protein_coding	-0.597977	1.58229e-07	1.12616e-05	7.03566
LINC01184	ENSG00000245937	lncRNA	-0.57336	1.59351e-07	1.12616e-05	7.02903
RPL7P24	ENSG00000240003	processed_pseudogene	0.519875	1.59181e-07	1.12616e-05	7.03003
IL18R1	ENSG00000115604	protein_coding	1.14016	1.61785e-07	1.13933e-05	7.01481
MSRB1	ENSG00000198736	protein_coding	0.602832	1.6301e-07	1.14393e-05	7.00773
TRBV20-1	ENSG00000211747	TR_V_gene	-0.7236	1.65256e-07	1.15564e-05	6.9949
UST	ENSG00000111962	protein_coding	-0.513311	1.68313e-07	1.17291e-05	6.9777
AC097376.2	ENSG00000248863	transcribed_processed_pseudogene	0.458991	1.70262e-07	1.18237e-05	6.96691
BRI3	ENSG00000164713	protein_coding	0.481271	1.71656e-07	1.18793e-05	6.95926
SIDT1	ENSG00000072858	protein_coding	-0.554832	1.72369e-07	1.18875e-05	6.95537
LIMK2	ENSG00000182541	protein_coding	0.667849	1.77577e-07	1.22046e-05	6.92745
AGTRAP	ENSG00000177674	protein_coding	0.484258	1.80173e-07	1.22567e-05	6.91384
CD1C	ENSG00000158481	protein_coding	-0.789084	1.79113e-07	1.22567e-05	6.91937
TRAJ36	ENSG00000276699	TR_J_gene	-0.674553	1.80174e-07	1.22567e-05	6.91383
LEF1-AS1	ENSG00000232021	lncRNA	-0.873602	1.85088e-07	1.25483e-05	6.8886
CCR8	ENSG00000179934	protein_coding	-0.607253	1.89939e-07	1.27845e-05	6.86434
PADI4	ENSG00000159339	protein_coding	0.68564	1.89362e-07	1.27845e-05	6.86719
SLC39A10	ENSG00000196950	protein_coding	-0.479156	1.90489e-07	1.27845e-05	6.86163
BTBD11	ENSG00000151136	protein_coding	-0.511529	1.93816e-07	1.28256e-05	6.84539
CHRM3-AS2	ENSG00000233355	lncRNA	-0.888514	1.94961e-07	1.28256e-05	6.83986
DIP2C	ENSG00000151240	protein_coding	-0.635302	1.94206e-07	1.28256e-05	6.8435
ENOSF1	ENSG00000132199	protein_coding	-0.585833	1.93024e-07	1.28256e-05	6.84923
FAM169A	ENSG00000198780	protein_coding	-0.634238	1.93484e-07	1.28256e-05	6.847
GATA3	ENSG00000107485	protein_coding	-0.604781	1.94311e-07	1.28256e-05	6.843
KCNE1	ENSG00000180509	protein_coding	0.851258	1.96231e-07	1.28256e-05	6.83378
RRN3P1	ENSG00000248124	transcribed_unprocessed_pseudogene	-0.476072	1.95813e-07	1.28256e-05	6.83578
CATSPERB	ENSG00000133962	protein_coding	-0.59333	1.98592e-07	1.28538e-05	6.82256
TRAV26-1	ENSG00000211807	TR_V_gene	-0.605635	1.98184e-07	1.28538e-05	6.82449
ZAP70	ENSG00000115085	protein_coding	-0.682705	1.98335e-07	1.28538e-05	6.82378
IFFO2	ENSG00000169991	protein_coding	-0.458511	2.01437e-07	1.29959e-05	6.80923
S100A9	ENSG00000163220	protein_coding	0.800699	2.05339e-07	1.32051e-05	6.79124
CDHR3	ENSG00000128536	protein_coding	-0.717911	2.0604e-07	1.32077e-05	6.78804
AMIGO1	ENSG00000181754	protein_coding	-0.591533	2.06766e-07	1.32119e-05	6.78474
CHST10	ENSG00000115526	protein_coding	-0.482675	2.09609e-07	1.33509e-05	6.77194
LRRN3	ENSG00000173114	protein_coding	-0.939566	2.15451e-07	1.36794e-05	6.74617
KLRK1	ENSG00000213809	protein_coding	-0.695733	2.18674e-07	1.38401e-05	6.73225
HLFP1	ENSG00000218194	processed_pseudogene	0.634303	2.19771e-07	1.38657e-05	6.72756
WDFY3-AS2	ENSG00000180769	lncRNA	0.605895	2.22901e-07	1.40189e-05	6.7143
S100A11	ENSG00000163191	protein_coding	0.655637	2.23682e-07	1.4024e-05	6.71102
DNM1P47	ENSG00000259660	transcribed_unprocessed_pseudogene	-0.548024	2.25708e-07	1.41059e-05	6.70257
TRAJ18	ENSG00000211871	TR_J_gene	-0.708281	2.264e-07	1.41059e-05	6.6997
AL391839.1	ENSG00000229327	lncRNA	-0.49203	2.30737e-07	1.42725e-05	6.68191
MTND3P12	ENSG00000259626	processed_pseudogene	0.706448	2.29879e-07	1.42725e-05	6.6854
RAB5IF	ENSG00000101084	protein_coding	0.451794	2.31215e-07	1.42725e-05	6.67997
CLRN1-AS1	ENSG00000239265	lncRNA	0.928222	2.39151e-07	1.46719e-05	6.64834
LINC02210	ENSG00000204650	transcribed_unitary_pseudogene	-0.546393	2.38484e-07	1.46719e-05	6.65096
CAMK2D	ENSG00000145349	protein_coding	-0.528327	2.41488e-07	1.46801e-05	6.63922
TRBJ2-7	ENSG00000211771	TR_J_gene	-0.645871	2.4079e-07	1.46801e-05	6.64194
ZNHIT6	ENSG00000117174	protein_coding	-0.489971	2.40951e-07	1.46801e-05	6.64131
CYP2U1	ENSG00000155016	protein_coding	-0.475164	2.43435e-07	1.4709e-05	6.6317
FAM160A2	ENSG00000051009	protein_coding	0.467668	2.43004e-07	1.4709e-05	6.63336
ARHGAP10	ENSG00000071205	protein_coding	-0.518467	2.50164e-07	1.49584e-05	6.60614
CEP126	ENSG00000110318	protein_coding	-0.546986	2.51301e-07	1.49584e-05	6.60189
LILRA6	ENSG00000244482	protein_coding	0.730611	2.50607e-07	1.49584e-05	6.60448
NLE1	ENSG00000073536	protein_coding	-0.477025	2.50002e-07	1.49584e-05	6.60675
SLC36A1	ENSG00000123643	protein_coding	0.548356	2.50557e-07	1.49584e-05	6.60467
LINC00402	ENSG00000235532	lncRNA	-1.00144	2.53571e-07	1.50487e-05	6.59346
AL139424.3	ENSG00000284735	lncRNA	0.615951	2.56007e-07	1.51393e-05	6.5845
ASAH2B	ENSG00000204147	protein_coding	-0.569135	2.56611e-07	1.51393e-05	6.58229
PHTF1	ENSG00000116793	protein_coding	0.556143	2.62952e-07	1.54224e-05	6.55942
TRAJ30	ENSG00000211859	TR_J_gene	-0.667108	2.62586e-07	1.54224e-05	6.56072
PYGL	ENSG00000100504	protein_coding	0.693724	2.67235e-07	1.56278e-05	6.54428
AC233976.2	ENSG00000287767	lncRNA	-0.642461	2.7102e-07	1.58029e-05	6.5311
KCNE1B	ENSG00000276289	protein_coding	0.825214	2.75627e-07	1.59093e-05	6.51531
RNU6-838P	ENSG00000200269	snRNA	-0.593546	2.76027e-07	1.59093e-05	6.51395
TRAV12-3	ENSG00000211794	TR_V_gene	-0.683579	2.74031e-07	1.59093e-05	6.52075
TRBV6-5	ENSG00000211721	TR_V_gene	-0.673554	2.758e-07	1.59093e-05	6.51472
FNDC3B	ENSG00000075420	protein_coding	0.46156	2.88302e-07	1.65691e-05	6.47318
CYCSP38	ENSG00000259513	transcribed_processed_pseudogene	-0.61682	2.94984e-07	1.68562e-05	6.45171
RPL3	ENSG00000100316	protein_coding	-0.466113	2.94774e-07	1.68562e-05	6.45238
AC040160.1	ENSG00000196155	protein_coding	-0.532295	2.9714e-07	1.69311e-05	6.44489
MRPS31P4	ENSG00000250299	transcribed_unprocessed_pseudogene	-0.469484	2.98052e-07	1.69347e-05	6.44202
LINC01988	ENSG00000283036	lncRNA	0.782801	3.00039e-07	1.69994e-05	6.43579
ACSL1	ENSG00000151726	protein_coding	0.807913	3.02483e-07	1.70894e-05	6.42819
ITGAM	ENSG00000169896	protein_coding	0.611584	3.0382e-07	1.71166e-05	6.42406
AL049796.1	ENSG00000260464	lncRNA	-0.452849	3.05392e-07	1.71333e-05	6.41923
PGS1	ENSG00000087157	protein_coding	0.607396	3.05829e-07	1.71333e-05	6.41789
LINC01259	ENSG00000249667	lncRNA	-0.729919	3.08135e-07	1.72073e-05	6.41085
ZNF681	ENSG00000196172	protein_coding	-0.661645	3.08871e-07	1.72073e-05	6.40861
F5	ENSG00000198734	protein_coding	0.672654	3.11508e-07	1.72586e-05	6.40065
LY9	ENSG00000122224	protein_coding	-0.594459	3.11518e-07	1.72586e-05	6.40062
GALNT12	ENSG00000119514	protein_coding	-0.535977	3.1243e-07	1.72613e-05	6.39788
ITGA7	ENSG00000135424	protein_coding	0.935927	3.1595e-07	1.74077e-05	6.38739
GBA	ENSG00000177628	protein_coding	0.604254	3.20759e-07	1.7609e-05	6.37324
LINC00342	ENSG00000232931	lncRNA	-0.543968	3.21665e-07	1.7609e-05	6.37059
MTX3	ENSG00000177034	protein_coding	-0.50547	3.24005e-07	1.7609e-05	6.3638
PLBD1-AS1	ENSG00000256751	lncRNA	0.600904	3.23459e-07	1.7609e-05	6.36538
ST3GAL4	ENSG00000110080	protein_coding	0.645663	3.23315e-07	1.7609e-05	6.3658
ETS2	ENSG00000157557	protein_coding	0.600246	3.2855e-07	1.78076e-05	6.35075
AGK	ENSG00000006530	protein_coding	-0.488836	3.34176e-07	1.80149e-05	6.33485
NAIPP1	ENSG00000250687	transcribed_unprocessed_pseudogene	0.778395	3.33527e-07	1.80149e-05	6.33667
UNC5A	ENSG00000113763	protein_coding	0.642029	3.36074e-07	1.80685e-05	6.32955
RNU6-37P	ENSG00000199562	snRNA	0.505988	3.40473e-07	1.82559e-05	6.31737
THNSL1	ENSG00000185875	protein_coding	-0.619945	3.43403e-07	1.83638e-05	6.30934
UBE3D	ENSG00000118420	protein_coding	-0.485676	3.44361e-07	1.83659e-05	6.30673
AC022762.2	ENSG00000267940	lncRNA	0.446319	3.50081e-07	1.86213e-05	6.2913
RNVU1-27	ENSG00000274210	snRNA	-0.466772	3.56695e-07	1.89228e-05	6.27377
AC139720.1	ENSG00000249806	lncRNA	-0.728811	3.6051e-07	1.9026e-05	6.26381
IL18RAP	ENSG00000115607	protein_coding	1.02872	3.60543e-07	1.9026e-05	6.26372
LINC01934	ENSG00000234663	lncRNA	-0.724387	3.6709e-07	1.93205e-05	6.24687
AC007556.1	ENSG00000235321	lncRNA	0.791277	3.76126e-07	1.93379e-05	6.2241
AC087854.1	ENSG00000251034	lncRNA	-0.526015	3.78056e-07	1.93379e-05	6.21931
ALOX5	ENSG00000012779	protein_coding	0.545072	3.77356e-07	1.93379e-05	6.22104
IFITM1	ENSG00000185885	protein_coding	0.687955	3.73844e-07	1.93379e-05	6.2298
KL	ENSG00000133116	protein_coding	0.736793	3.71761e-07	1.93379e-05	6.23503
MANSC1	ENSG00000111261	protein_coding	0.780797	3.70123e-07	1.93379e-05	6.23917
RORA-AS1	ENSG00000245534	lncRNA	-0.619555	3.7433e-07	1.93379e-05	6.22859
SH3GLB1	ENSG00000097033	protein_coding	0.532321	3.75411e-07	1.93379e-05	6.22588
SKAP1	ENSG00000141293	protein_coding	-0.527485	3.70957e-07	1.93379e-05	6.23706
SPAG16	ENSG00000144451	protein_coding	-0.562906	3.7275e-07	1.93379e-05	6.23255
TRAJ3	ENSG00000211886	TR_J_gene	-0.650272	3.70489e-07	1.93379e-05	6.23824
HAPLN3	ENSG00000140511	protein_coding	-0.61991	3.79056e-07	1.93396e-05	6.21684
AC245884.2	ENSG00000234436	unprocessed_pseudogene	0.689936	3.82446e-07	1.94629e-05	6.2085
PRKCQ-AS1	ENSG00000237943	lncRNA	-0.725759	3.86856e-07	1.96373e-05	6.19776
TRAV8-3	ENSG00000211787	TR_V_gene	-0.669733	3.90691e-07	1.97773e-05	6.18853
ZNF354B	ENSG00000178338	protein_coding	-0.458035	3.9159e-07	1.97773e-05	6.18638
DDHD2	ENSG00000085788	protein_coding	-0.476999	3.92936e-07	1.97953e-05	6.18316
NAIPP2	ENSG00000179978	unprocessed_pseudogene	0.632403	3.93958e-07	1.97969e-05	6.18073
AGAP1	ENSG00000157985	protein_coding	-0.739788	3.97964e-07	1.98095e-05	6.17126
AL035661.1	ENSG00000274173	lncRNA	1.12051	3.99162e-07	1.98095e-05	6.16844
AL353597.2	ENSG00000229559	transcribed_processed_pseudogene	-0.644187	3.96365e-07	1.98095e-05	6.17503
C21orf62-AS1	ENSG00000205930	lncRNA	-0.458169	3.98189e-07	1.98095e-05	6.17073
LCK	ENSG00000182866	protein_coding	-0.681876	3.96286e-07	1.98095e-05	6.17521
B3GNT5	ENSG00000176597	protein_coding	0.577704	4.0517e-07	1.99263e-05	6.15446
CD2	ENSG00000116824	protein_coding	-0.673273	4.05711e-07	1.99263e-05	6.15321
S100A12	ENSG00000163221	protein_coding	1.01659	4.10481e-07	1.99263e-05	6.14226
SIDT1-AS1	ENSG00000239453	lncRNA	-0.532948	4.07945e-07	1.99263e-05	6.14806
SLC2A3	ENSG00000059804	protein_coding	0.712754	4.03479e-07	1.99263e-05	6.15837
TBC1D8	ENSG00000204634	protein_coding	0.476201	4.06771e-07	1.99263e-05	6.15076
TRAJ34	ENSG00000211855	TR_J_gene	-0.628863	4.10226e-07	1.99263e-05	6.14285
UBAP1	ENSG00000165006	protein_coding	0.457887	4.09378e-07	1.99263e-05	6.14478
ZNF663P	ENSG00000215452	transcribed_unitary_pseudogene	0.490548	4.08118e-07	1.99263e-05	6.14767
AUTS2	ENSG00000158321	protein_coding	-0.573552	4.14624e-07	2.00262e-05	6.13286
KIAA0040	ENSG00000235750	protein_coding	0.478796	4.15641e-07	2.00262e-05	6.13057
TRAV13-2	ENSG00000211791	TR_V_gene	-0.715437	4.15215e-07	2.00262e-05	6.13153
TRBV18	ENSG00000276557	TR_V_gene	-0.637328	4.16545e-07	2.00262e-05	6.12853
SLC9A4	ENSG00000180251	protein_coding	0.776212	4.20679e-07	2.01764e-05	6.11929
AL132780.1	ENSG00000257285	lncRNA	0.57013	4.25946e-07	2.03802e-05	6.10764
AL365361.1	ENSG00000259834	lncRNA	-0.61439	4.31203e-07	2.05335e-05	6.09616
USB1	ENSG00000103005	protein_coding	0.585111	4.30368e-07	2.05335e-05	6.09797
C19orf38	ENSG00000214212	protein_coding	0.477241	4.34004e-07	2.0582e-05	6.0901
KLHL32	ENSG00000186231	protein_coding	-0.537073	4.3531e-07	2.0582e-05	6.08729
SLA	ENSG00000155926	protein_coding	0.536298	4.35126e-07	2.0582e-05	6.08768
AC010727.1	ENSG00000288050	lncRNA	-0.46834	4.40544e-07	2.07347e-05	6.0761
TRAC	ENSG00000277734	TR_C_gene	-0.731614	4.41454e-07	2.07347e-05	6.07417
ZNF566	ENSG00000186017	protein_coding	-0.484966	4.4165e-07	2.07347e-05	6.07375
LINC02273	ENSG00000245954	lncRNA	-0.711267	4.46233e-07	2.09009e-05	6.06409
ROPN1L	ENSG00000145491	protein_coding	0.629064	4.4776e-07	2.09233e-05	6.06089
AC015849.5	ENSG00000270977	transcribed_processed_pseudogene	-0.646536	4.55067e-07	2.11514e-05	6.04574
AC084871.2	ENSG00000251139	lncRNA	0.799622	4.55812e-07	2.11514e-05	6.04421
SOCS3	ENSG00000184557	protein_coding	0.96533	4.55318e-07	2.11514e-05	6.04522
AC010275.1	ENSG00000248268	lncRNA	-0.72079	4.62881e-07	2.14077e-05	6.0298
TRBV15	ENSG00000276819	TR_V_gene	-0.660727	4.63477e-07	2.14077e-05	6.0286
LHFPL5	ENSG00000197753	protein_coding	0.557094	4.6513e-07	2.14346e-05	6.02527
ABCB1	ENSG00000085563	protein_coding	-0.621173	4.66374e-07	2.14425e-05	6.02277
UBXN2B	ENSG00000215114	protein_coding	0.494653	4.68846e-07	2.15067e-05	6.01782
AC066616.2	ENSG00000259600	processed_pseudogene	0.710508	4.71571e-07	2.15146e-05	6.01239
NEMP2	ENSG00000189362	protein_coding	-0.478591	4.71388e-07	2.15146e-05	6.01276
POR	ENSG00000127948	protein_coding	0.526485	4.72293e-07	2.15146e-05	6.01096
RPL10A	ENSG00000198755	protein_coding	-0.472194	4.73322e-07	2.15146e-05	6.00893
AL034397.3	ENSG00000274536	lncRNA	0.573674	4.77679e-07	2.15479e-05	6.00035
IPO5P1	ENSG00000269837	transcribed_processed_pseudogene	-0.535169	4.76941e-07	2.15479e-05	6.0018
MIR3142HG	ENSG00000253522	lncRNA	-0.628982	4.78364e-07	2.15479e-05	5.99901
VNN1	ENSG00000112299	protein_coding	1.13954	4.77452e-07	2.15479e-05	6.00079
HLA-DOA	ENSG00000204252	protein_coding	-0.652782	4.8508e-07	2.18013e-05	5.98596
MAF	ENSG00000178573	protein_coding	-0.468653	4.91225e-07	2.2028e-05	5.97418
ZNF527	ENSG00000189164	protein_coding	-0.491599	4.92709e-07	2.20452e-05	5.97136
TECPR2	ENSG00000196663	protein_coding	0.565622	5.0349e-07	2.24773e-05	5.9511
SIPA1L2	ENSG00000116991	protein_coding	0.784868	5.07376e-07	2.26003e-05	5.94391
GPRASP1	ENSG00000198932	protein_coding	-0.627516	5.10385e-07	2.26335e-05	5.93837
IL2RA	ENSG00000134460	protein_coding	-0.616612	5.09923e-07	2.26335e-05	5.93922
LMO7	ENSG00000136153	protein_coding	-0.498896	5.13273e-07	2.2661e-05	5.93309
SLC35G1	ENSG00000176273	protein_coding	-0.461683	5.12252e-07	2.2661e-05	5.93496
LINC01375	ENSG00000226159	lncRNA	-0.576128	5.20499e-07	2.29295e-05	5.92001
MGAM	ENSG00000257335	protein_coding	0.829262	5.3848e-07	2.36694e-05	5.88823
TSPO	ENSG00000100300	protein_coding	0.490183	5.41438e-07	2.37473e-05	5.88311
BACH2	ENSG00000112182	protein_coding	-0.755009	5.46508e-07	2.37726e-05	5.87439
MAFG	ENSG00000197063	protein_coding	0.507515	5.4677e-07	2.37726e-05	5.87394
NR1I3	ENSG00000143257	protein_coding	0.45625	5.45706e-07	2.37726e-05	5.87576
RNU6-316P	ENSG00000212329	snRNA	-0.449317	5.44863e-07	2.37726e-05	5.87721
MYO10	ENSG00000145555	protein_coding	0.869902	5.4844e-07	2.37935e-05	5.87109
LINC01267	ENSG00000251576	lncRNA	0.567436	5.5255e-07	2.39199e-05	5.8641
ANXA3	ENSG00000138772	protein_coding	1.01184	5.55306e-07	2.39873e-05	5.85945
TET1	ENSG00000138336	protein_coding	-0.502524	5.6106e-07	2.41836e-05	5.8498
EPB41L2	ENSG00000079819	protein_coding	-0.475176	5.68294e-07	2.44428e-05	5.83782
SERPINB1	ENSG00000021355	protein_coding	0.561859	5.87229e-07	2.5203e-05	5.80716
IL1RN	ENSG00000136689	protein_coding	0.593633	5.98065e-07	2.55583e-05	5.79005
RALB	ENSG00000144118	protein_coding	0.577549	5.96929e-07	2.55583e-05	5.79183
ARL4C	ENSG00000188042	protein_coding	-0.592489	6.04307e-07	2.577e-05	5.78034
NAIPP3	ENSG00000248477	transcribed_unprocessed_pseudogene	0.613936	6.09028e-07	2.58063e-05	5.77306
TRAJ51	ENSG00000248366	TR_J_pseudogene	-0.605109	6.07217e-07	2.58063e-05	5.77585
VWA8-AS1	ENSG00000278338	lncRNA	0.689805	6.08176e-07	2.58063e-05	5.77437
HLA-DPB1	ENSG00000223865	protein_coding	-0.53814	6.12965e-07	2.58635e-05	5.76703
IFNAR1	ENSG00000142166	protein_coding	0.463785	6.11867e-07	2.58635e-05	5.76871
TRAJ11	ENSG00000211878	TR_J_gene	-0.665713	6.15914e-07	2.59332e-05	5.76254
AKT3	ENSG00000117020	protein_coding	-0.455813	6.24691e-07	2.62475e-05	5.74931
TYROBP	ENSG00000011600	protein_coding	0.461333	6.26204e-07	2.62559e-05	5.74705
ADAT2	ENSG00000189007	protein_coding	-0.501995	6.28627e-07	2.63024e-05	5.74344
ITM2A	ENSG00000078596	protein_coding	-0.658614	6.3931e-07	2.66791e-05	5.72768
SQOR	ENSG00000137767	protein_coding	0.510022	6.40297e-07	2.66791e-05	5.72623
CCDC71L	ENSG00000253276	protein_coding	0.598298	6.43161e-07	2.66985e-05	5.72206
CLYBL	ENSG00000125246	protein_coding	-0.532723	6.43435e-07	2.66985e-05	5.72166
AC084398.2	ENSG00000257202	lncRNA	0.404457	6.4855e-07	2.67674e-05	5.71425
BMX	ENSG00000102010	protein_coding	0.942934	6.46814e-07	2.67674e-05	5.71676
E2F3	ENSG00000112242	protein_coding	0.501501	6.49309e-07	2.67674e-05	5.71316
SULT1B1	ENSG00000173597	protein_coding	0.645513	6.50448e-07	2.67674e-05	5.71152
HAUS4	ENSG00000092036	protein_coding	0.537299	6.56804e-07	2.69182e-05	5.70243
TRAV20	ENSG00000211800	TR_V_gene	-0.617882	6.56169e-07	2.69182e-05	5.70333
MATK	ENSG00000007264	protein_coding	-0.663797	6.62415e-07	2.70926e-05	5.69447
METAP1D	ENSG00000172878	protein_coding	-0.450607	6.71176e-07	2.73949e-05	5.68219
ZDHHC19	ENSG00000163958	protein_coding	1.03589	6.73353e-07	2.74278e-05	5.67916
AL391832.2	ENSG00000238005	lncRNA	0.657549	6.8025e-07	2.76004e-05	5.66963
CLEC5A	ENSG00000258227	protein_coding	0.771663	6.81419e-07	2.76004e-05	5.66802
WBP1LP1	ENSG00000243661	processed_pseudogene	-0.524787	6.81729e-07	2.76004e-05	5.6676
FBL	ENSG00000105202	protein_coding	-0.433603	6.87679e-07	2.7729e-05	5.65947
SNURF	ENSG00000273173	protein_coding	-0.494987	6.86793e-07	2.7729e-05	5.66068
GPAT3	ENSG00000138678	protein_coding	0.573716	6.9683e-07	2.78837e-05	5.64711
GUSBP1	ENSG00000183666	transcribed_unprocessed_pseudogene	-0.467178	6.93957e-07	2.78837e-05	5.65097
LINC02520	ENSG00000204110	lncRNA	-0.729888	6.97093e-07	2.78837e-05	5.64676
THEM4	ENSG00000159445	protein_coding	-0.622369	6.96459e-07	2.78837e-05	5.64761
DRAM1	ENSG00000136048	protein_coding	0.455885	7.01271e-07	2.79391e-05	5.64117
ICOS	ENSG00000163600	protein_coding	-0.738692	7.01223e-07	2.79391e-05	5.64123
AC025164.2	ENSG00000245904	lncRNA	-0.442486	7.03337e-07	2.79657e-05	5.63842
AC020636.2	ENSG00000260234	protein_coding	0.89735	7.07616e-07	2.808e-05	5.63275
NLRC3	ENSG00000167984	protein_coding	-0.575284	7.09364e-07	2.80936e-05	5.63044
B4GALT5	ENSG00000158470	protein_coding	0.678196	7.13658e-07	2.82078e-05	5.6248
TMEM177	ENSG00000144120	protein_coding	-0.430809	7.22348e-07	2.8495e-05	5.61348
AC107241.1	ENSG00000259274	lncRNA	-0.554475	7.30298e-07	2.87519e-05	5.60325
SLC22A4	ENSG00000197208	protein_coding	0.62552	7.38235e-07	2.90073e-05	5.59314
GIMAP5	ENSG00000196329	protein_coding	-0.468764	7.43729e-07	2.91658e-05	5.58621
AC136297.1	ENSG00000287935	lncRNA	0.553442	7.45846e-07	2.91724e-05	5.58355
TRBJ1-3	ENSG00000282133	TR_J_gene	-0.596334	7.46813e-07	2.91724e-05	5.58234
ARL11	ENSG00000152213	protein_coding	0.44206	7.50896e-07	2.92389e-05	5.57724
IL4R	ENSG00000077238	protein_coding	0.591699	7.51511e-07	2.92389e-05	5.57648
TRAV8-6	ENSG00000211795	TR_V_gene	-0.589064	7.52901e-07	2.92389e-05	5.57475
LBH	ENSG00000213626	protein_coding	-0.519131	7.59085e-07	2.94219e-05	5.5671
AC008608.2	ENSG00000271737	lncRNA	-0.445328	7.66881e-07	2.96093e-05	5.55755
BMPR1A	ENSG00000107779	protein_coding	-0.502049	7.66344e-07	2.96093e-05	5.55821
MGAM2	ENSG00000257743	protein_coding	0.935177	7.75007e-07	2.98654e-05	5.5477
CHIC1	ENSG00000204116	protein_coding	-0.60436	7.82001e-07	3.0077e-05	5.5393
AK5	ENSG00000154027	protein_coding	-0.722071	7.86601e-07	3.01958e-05	5.53382
CCR4	ENSG00000183813	protein_coding	-0.582304	7.91277e-07	3.03171e-05	5.52828
TRAJ39	ENSG00000211850	TR_J_gene	-0.623564	7.95082e-07	3.04047e-05	5.52379
AL513534.3	ENSG00000260400	lncRNA	-0.516512	7.98865e-07	3.0491e-05	5.51936
MARCHF3	ENSG00000173926	protein_coding	0.580793	8.06361e-07	3.07185e-05	5.51063
AC064853.2	ENSG00000285843	polymorphic_pseudogene	0.513149	8.0875e-07	3.0751e-05	5.50786
BDH1	ENSG00000161267	protein_coding	-0.501024	8.1409e-07	3.08953e-05	5.50171
HPCAL4	ENSG00000116983	protein_coding	-0.702949	8.17103e-07	3.09509e-05	5.49826
GPA33	ENSG00000143167	protein_coding	-0.671822	8.18714e-07	3.09533e-05	5.49642
AC093010.1	ENSG00000240487	processed_pseudogene	-0.558812	8.21621e-07	3.09726e-05	5.4931
ID3	ENSG00000117318	protein_coding	-0.632576	8.22322e-07	3.09726e-05	5.49231
ANKRD20A5P	ENSG00000186481	transcribed_unprocessed_pseudogene	-0.59664	8.29946e-07	3.10923e-05	5.48368
LINC00426	ENSG00000238121	lncRNA	-0.498059	8.30164e-07	3.10923e-05	5.48343
ZNF319	ENSG00000166188	protein_coding	0.418753	8.29217e-07	3.10923e-05	5.4845
AC034238.2	ENSG00000240535	lncRNA	-0.687953	8.36879e-07	3.12268e-05	5.4759
STAT3	ENSG00000168610	protein_coding	0.464902	8.36509e-07	3.12268e-05	5.47632
PRKCD	ENSG00000163932	protein_coding	0.48488	8.39883e-07	3.1252e-05	5.47256
ZNF607	ENSG00000198182	protein_coding	-0.518409	8.40677e-07	3.1252e-05	5.47167
C11orf42	ENSG00000180878	protein_coding	0.47709	8.49621e-07	3.15258e-05	5.46178
NFE2	ENSG00000123405	protein_coding	0.567654	8.53221e-07	3.16008e-05	5.45783
HDAC9	ENSG00000048052	protein_coding	-0.536592	8.56568e-07	3.16661e-05	5.45417
AC055748.1	ENSG00000244720	processed_pseudogene	-0.786682	8.63234e-07	3.18537e-05	5.44693
AC132872.5	ENSG00000287737	lncRNA	0.617334	8.73748e-07	3.21823e-05	5.43561
AGGF1P1	ENSG00000214273	processed_pseudogene	-0.598289	8.77492e-07	3.22158e-05	5.43162
TRAJ7	ENSG00000211882	TR_J_gene	-0.650218	8.77881e-07	3.22158e-05	5.4312
OR52X1P	ENSG00000234895	unitary_pseudogene	0.580605	8.84507e-07	3.23995e-05	5.42417
AC135626.2	ENSG00000287328	unprocessed_pseudogene	0.552389	8.87297e-07	3.24423e-05	5.42123
AL138713.1	ENSG00000280348	TEC	-0.657411	9.11211e-07	3.32031e-05	5.39638
PIGL	ENSG00000108474	protein_coding	-0.539268	9.11426e-07	3.32031e-05	5.39616
AC129492.1	ENSG00000214999	lncRNA	-0.449917	9.23117e-07	3.35621e-05	5.38425
RADX	ENSG00000147231	protein_coding	-0.590882	9.24637e-07	3.35621e-05	5.38271
AL158055.1	ENSG00000226530	lncRNA	-0.668775	9.27799e-07	3.36159e-05	5.37952
AC116158.3	ENSG00000286786	lncRNA	-0.540516	9.33602e-07	3.36447e-05	5.3737
SHISA5	ENSG00000164054	protein_coding	0.50652	9.32187e-07	3.36447e-05	5.37511
WDR54	ENSG00000005448	protein_coding	-0.489106	9.3364e-07	3.36447e-05	5.37366
AC012569.1	ENSG00000267293	processed_pseudogene	0.743377	9.35664e-07	3.3657e-05	5.37164
TRIB1	ENSG00000173334	protein_coding	0.549341	9.48793e-07	3.4068e-05	5.35862
RGL4	ENSG00000159496	protein_coding	0.709335	9.53195e-07	3.41647e-05	5.35429
DCAF13P2	ENSG00000250816	processed_pseudogene	0.674241	9.56516e-07	3.42224e-05	5.35104
PIM3	ENSG00000198355	protein_coding	0.496722	9.58824e-07	3.42437e-05	5.34879
CEP78	ENSG00000148019	protein_coding	-0.629635	9.70268e-07	3.44082e-05	5.3377
CLVS1	ENSG00000177182	protein_coding	0.515806	9.65163e-07	3.44082e-05	5.34263
PASK	ENSG00000115687	protein_coding	-0.533229	9.70312e-07	3.44082e-05	5.33766
YAE1	ENSG00000241127	protein_coding	-0.492163	9.69724e-07	3.44082e-05	5.33823
BCAS4	ENSG00000124243	protein_coding	-0.545518	9.72248e-07	3.44159e-05	5.3358
GALNT14	ENSG00000158089	protein_coding	0.879558	9.98423e-07	3.51902e-05	5.31098
RN7SL634P	ENSG00000242894	misc_RNA	0.614473	9.99402e-07	3.51902e-05	5.31006
SPATA13-AS1	ENSG00000227213	lncRNA	-0.5377	9.98746e-07	3.51902e-05	5.31068
C1RL	ENSG00000139178	protein_coding	0.501325	1.00164e-06	3.52071e-05	5.30797
ABCD2	ENSG00000173208	protein_coding	-0.820182	1.00577e-06	3.52903e-05	5.30413
TRAJ8	ENSG00000211881	TR_J_pseudogene	-0.622648	1.00894e-06	3.53394e-05	5.30119
AC008966.1	ENSG00000247796	lncRNA	-0.472661	1.01277e-06	3.5343e-05	5.29765
AC072022.1	ENSG00000228804	lncRNA	0.578063	1.01261e-06	3.5343e-05	5.2978
MARS2	ENSG00000247626	protein_coding	-0.449221	1.01435e-06	3.5343e-05	5.2962
NOP58	ENSG00000055044	protein_coding	-0.485047	1.02272e-06	3.54495e-05	5.28852
PLCE1	ENSG00000138193	protein_coding	-0.462269	1.02158e-06	3.54495e-05	5.28956
SLC37A3	ENSG00000157800	protein_coding	0.629266	1.02175e-06	3.54495e-05	5.28941
ADAM32	ENSG00000197140	protein_coding	0.454167	1.03421e-06	3.56009e-05	5.27809
C5orf63	ENSG00000164241	protein_coding	-0.567676	1.02944e-06	3.56009e-05	5.2824
FKBP5	ENSG00000096060	protein_coding	0.805781	1.03069e-06	3.56009e-05	5.28127
TRAJ13	ENSG00000211876	TR_J_gene	-0.677871	1.03356e-06	3.56009e-05	5.27867
AC009229.3	ENSG00000273006	lncRNA	0.650474	1.03776e-06	3.56181e-05	5.27488
PRKACB	ENSG00000142875	protein_coding	-0.561246	1.03827e-06	3.56181e-05	5.27442
CD6	ENSG00000013725	protein_coding	-0.736869	1.04544e-06	3.5703e-05	5.268
LINC00865	ENSG00000232229	lncRNA	-0.482997	1.04602e-06	3.5703e-05	5.26748
ZNF248	ENSG00000198105	protein_coding	-0.500192	1.0461e-06	3.5703e-05	5.26741
ABHD12B	ENSG00000131969	protein_coding	0.654373	1.04796e-06	3.57055e-05	5.26575
MARCKS	ENSG00000277443	protein_coding	0.56038	1.05898e-06	3.60196e-05	5.25598
ADGRG3	ENSG00000182885	protein_coding	0.796616	1.07588e-06	3.6351e-05	5.24118
GPR160	ENSG00000173890	protein_coding	0.554929	1.07599e-06	3.6351e-05	5.24109
PPP4R1L	ENSG00000124224	transcribed_unprocessed_pseudogene	0.43747	1.07503e-06	3.6351e-05	5.24193
SEMA4F	ENSG00000135622	protein_coding	-0.491065	1.07227e-06	3.6351e-05	5.24432
TRAV22	ENSG00000211802	TR_V_gene	-0.597215	1.08402e-06	3.65605e-05	5.23415
CXCL16	ENSG00000161921	protein_coding	0.622422	1.09815e-06	3.66925e-05	5.22205
DYSF	ENSG00000135636	protein_coding	0.818738	1.09301e-06	3.66925e-05	5.22643
OLFM1	ENSG00000130558	protein_coding	-0.719757	1.09132e-06	3.66925e-05	5.22787
OSGEPL1	ENSG00000128694	protein_coding	-0.428609	1.09853e-06	3.66925e-05	5.22173
TMEM185B	ENSG00000226479	protein_coding	0.464848	1.10058e-06	3.66925e-05	5.21999
ZBTB10	ENSG00000205189	protein_coding	-0.507895	1.10216e-06	3.66925e-05	5.21864
ZNF286A	ENSG00000187607	protein_coding	-0.522823	1.09595e-06	3.66925e-05	5.22393
ZNF69	ENSG00000198429	protein_coding	-0.467243	1.10261e-06	3.66925e-05	5.21827
MYD88	ENSG00000172936	protein_coding	0.532849	1.10907e-06	3.68461e-05	5.21281
AC080023.1	ENSG00000254554	lncRNA	0.610837	1.11114e-06	3.68536e-05	5.21107
AQP9	ENSG00000103569	protein_coding	0.687747	1.11598e-06	3.69229e-05	5.20701
TSEN34	ENSG00000170892	protein_coding	0.478521	1.11692e-06	3.69229e-05	5.20622
CCR12P	ENSG00000238241	transcribed_unprocessed_pseudogene	-0.721945	1.12348e-06	3.70786e-05	5.20075
CPEB1-AS1	ENSG00000259462	lncRNA	0.602163	1.1322e-06	3.71927e-05	5.19353
IGHEP2	ENSG00000254017	IG_C_pseudogene	0.491427	1.13624e-06	3.71927e-05	5.19021
ITGA4	ENSG00000115232	protein_coding	-0.473392	1.13014e-06	3.71927e-05	5.19523
PLXNC1	ENSG00000136040	protein_coding	0.518023	1.13498e-06	3.71927e-05	5.19124
TCEA3	ENSG00000204219	protein_coding	-0.617072	1.13472e-06	3.71927e-05	5.19146
AC015920.1	ENSG00000278972	TEC	-0.540483	1.16433e-06	3.80499e-05	5.1674
MAN1C1	ENSG00000117643	protein_coding	-0.563578	1.16775e-06	3.80994e-05	5.16466
GLT1D1	ENSG00000151948	protein_coding	0.556217	1.17707e-06	3.83411e-05	5.15723
EVL	ENSG00000196405	protein_coding	-0.57379	1.19119e-06	3.8738e-05	5.1461
SLC40A1	ENSG00000138449	protein_coding	0.536114	1.19922e-06	3.89358e-05	5.13983
PHF21A	ENSG00000135365	protein_coding	0.437292	1.21487e-06	3.93799e-05	5.12772
MLLT3	ENSG00000171843	protein_coding	-0.509179	1.21739e-06	3.93977e-05	5.12579
GCFC2	ENSG00000005436	protein_coding	-0.4456	1.22044e-06	3.94326e-05	5.12345
AL353662.1	ENSG00000227383	processed_pseudogene	0.462513	1.22242e-06	3.94328e-05	5.12194
GNB2	ENSG00000172354	protein_coding	0.477505	1.22649e-06	3.95005e-05	5.11883
KLF14	ENSG00000266265	protein_coding	0.865132	1.24088e-06	3.97738e-05	5.10794
RIC3	ENSG00000166405	protein_coding	-0.686944	1.23738e-06	3.97738e-05	5.11058
SACS	ENSG00000151835	protein_coding	-0.607843	1.24194e-06	3.97738e-05	5.10714
ZNF831	ENSG00000124203	protein_coding	-0.611629	1.24293e-06	3.97738e-05	5.1064
BST1	ENSG00000109743	protein_coding	0.483023	1.25832e-06	4.01379e-05	5.09491
ZNF853	ENSG00000236609	protein_coding	-0.569828	1.25791e-06	4.01379e-05	5.09521
FUT7	ENSG00000180549	protein_coding	0.585662	1.26704e-06	4.03516e-05	5.08846
KCNJ15	ENSG00000157551	protein_coding	0.701996	1.27301e-06	4.04192e-05	5.08408
TRAJ53	ENSG00000211837	TR_J_gene	-0.531092	1.27321e-06	4.04192e-05	5.08393
AC116353.6	ENSG00000283602	transcribed_unitary_pseudogene	0.548845	1.27781e-06	4.04749e-05	5.08056
PADI2	ENSG00000117115	protein_coding	0.81039	1.27901e-06	4.04749e-05	5.07969
CD55	ENSG00000196352	protein_coding	0.635866	1.28439e-06	4.0581e-05	5.07577
COX10-AS1	ENSG00000236088	lncRNA	-0.432955	1.2888e-06	4.06561e-05	5.07257
AC097376.3	ENSG00000273247	lncRNA	0.437418	1.30962e-06	4.12479e-05	5.0576
CLIC5	ENSG00000112782	protein_coding	-0.517715	1.31311e-06	4.12926e-05	5.05512
SH2D1B	ENSG00000198574	protein_coding	-0.694822	1.31844e-06	4.13952e-05	5.05134
UPB1	ENSG00000100024	protein_coding	0.621441	1.3322e-06	4.17617e-05	5.04165
TRBV3-1	ENSG00000237702	TR_V_gene	-0.673641	1.35109e-06	4.22875e-05	5.02851
NR1D2	ENSG00000174738	protein_coding	-0.484951	1.35513e-06	4.23478e-05	5.02572
DYNLT1	ENSG00000146425	protein_coding	0.428345	1.3751e-06	4.26305e-05	5.01206
IFITM3	ENSG00000142089	protein_coding	0.748958	1.3678e-06	4.26305e-05	5.01703
LINC00671	ENSG00000213373	lncRNA	0.690595	1.37498e-06	4.26305e-05	5.01214
PRR5L	ENSG00000135362	protein_coding	-0.56527	1.3791e-06	4.26305e-05	5.00935
RTN3	ENSG00000133318	protein_coding	0.45403	1.37418e-06	4.26305e-05	5.01269
SELENOM	ENSG00000198832	protein_coding	-0.474837	1.37582e-06	4.26305e-05	5.01157
SLAMF1	ENSG00000117090	protein_coding	-0.548013	1.3776e-06	4.26305e-05	5.01036
CTLA4	ENSG00000163599	protein_coding	-0.593972	1.38486e-06	4.27425e-05	5.00546
LANCL1	ENSG00000115365	protein_coding	-0.458819	1.39038e-06	4.28469e-05	5.00174
AC004825.3	ENSG00000287643	lncRNA	0.443371	1.39783e-06	4.29077e-05	4.99676
OSCAR	ENSG00000170909	protein_coding	0.55481	1.39653e-06	4.29077e-05	4.99762
TGFBR3	ENSG00000069702	protein_coding	-0.721536	1.39879e-06	4.29077e-05	4.99612
AC016831.5	ENSG00000271522	lncRNA	0.612662	1.4248e-06	4.35401e-05	4.97892
GADD45B	ENSG00000099860	protein_coding	0.495099	1.42594e-06	4.35401e-05	4.97817
PLIN5	ENSG00000214456	protein_coding	0.6804	1.42506e-06	4.35401e-05	4.97875
AC008555.1	ENSG00000261754	lncRNA	-0.544582	1.44426e-06	4.39797e-05	4.96626
FPR2	ENSG00000171049	protein_coding	0.618904	1.44473e-06	4.39797e-05	4.96595
GPR174	ENSG00000147138	protein_coding	-0.695914	1.45433e-06	4.42046e-05	4.95977
CLUHP3	ENSG00000131797	transcribed_unprocessed_pseudogene	-0.598994	1.46365e-06	4.44203e-05	4.95381
ALDH1A2	ENSG00000128918	protein_coding	0.653834	1.47159e-06	4.45937e-05	4.94876
MIR3945HG	ENSG00000251230	lncRNA	0.757573	1.47601e-06	4.466e-05	4.94596
SNHG1	ENSG00000255717	lncRNA	-0.42751	1.47945e-06	4.46965e-05	4.94379
MBLAC2	ENSG00000176055	protein_coding	-0.49603	1.49092e-06	4.49749e-05	4.93659
AC009432.2	ENSG00000287950	lncRNA	0.567658	1.50538e-06	4.53429e-05	4.92758
CD3G	ENSG00000160654	protein_coding	-0.65835	1.52756e-06	4.59416e-05	4.91393
ALKBH8	ENSG00000137760	protein_coding	-0.473638	1.56715e-06	4.70374e-05	4.89006
STAT4	ENSG00000138378	protein_coding	-0.553704	1.5687e-06	4.70374e-05	4.88913
TRBD1	ENSG00000282431	TR_D_gene	-0.560855	1.58183e-06	4.73601e-05	4.88135
AC005153.1	ENSG00000286658	lncRNA	0.774488	1.59047e-06	4.73612e-05	4.87627
SH2D1A	ENSG00000183918	protein_coding	-0.75636	1.59078e-06	4.73612e-05	4.87609
TRPM2	ENSG00000142185	protein_coding	0.610363	1.59134e-06	4.73612e-05	4.87576
ZFP82	ENSG00000181007	protein_coding	-0.510091	1.58928e-06	4.73612e-05	4.87697
C2CD4D	ENSG00000225556	protein_coding	-0.499089	1.60064e-06	4.75674e-05	4.87032
AL731567.1	ENSG00000231964	lncRNA	0.579071	1.62248e-06	4.81448e-05	4.85768
WDR86-AS1	ENSG00000243836	lncRNA	-0.643059	1.647e-06	4.87999e-05	4.84369
JDP2	ENSG00000140044	protein_coding	0.521408	1.66347e-06	4.9215e-05	4.8344
AC020636.1	ENSG00000243273	lncRNA	0.844554	1.67007e-06	4.92646e-05	4.83071
SIRPG-AS1	ENSG00000237914	lncRNA	-0.643627	1.67001e-06	4.92646e-05	4.83074
FBLN7	ENSG00000144152	protein_coding	-0.582119	1.6949e-06	4.99233e-05	4.81694
NLRC4	ENSG00000091106	protein_coding	0.606285	1.70153e-06	4.99716e-05	4.8133
RN7SKP16	ENSG00000222112	misc_RNA	0.713912	1.70013e-06	4.99716e-05	4.81406
AC007278.1	ENSG00000234389	lncRNA	1.00338	1.72123e-06	5.04021e-05	4.80256
PEBP1	ENSG00000089220	protein_coding	-0.497894	1.71892e-06	5.04021e-05	4.80381
PHC2	ENSG00000134686	protein_coding	0.730419	1.72795e-06	5.05249e-05	4.79892
STX3	ENSG00000166900	protein_coding	0.496907	1.73303e-06	5.05994e-05	4.79619
CEBPD	ENSG00000221869	protein_coding	0.624389	1.74032e-06	5.06561e-05	4.79227
SLC16A3	ENSG00000141526	protein_coding	0.481843	1.73848e-06	5.06561e-05	4.79326
SYNE1-AS1	ENSG00000234577	lncRNA	0.456362	1.74257e-06	5.06561e-05	4.79107
AP003327.2	ENSG00000287426	lncRNA	-0.618603	1.74688e-06	5.07076e-05	4.78876
PRSS3P1	ENSG00000250591	unprocessed_pseudogene	-0.562393	1.7705e-06	5.13189e-05	4.77623
AC015912.3	ENSG00000274213	lncRNA	0.628778	1.78189e-06	5.15743e-05	4.77025
DGKE	ENSG00000153933	protein_coding	-0.421057	1.79388e-06	5.16225e-05	4.764
KLRC1	ENSG00000134545	protein_coding	-0.802415	1.78948e-06	5.16225e-05	4.76629
RN7SL5P	ENSG00000265735	misc_RNA	0.496527	1.7883e-06	5.16225e-05	4.7669
TXK	ENSG00000074966	protein_coding	-0.612452	1.79275e-06	5.16225e-05	4.76459
LYN	ENSG00000254087	protein_coding	0.471545	1.80295e-06	5.18089e-05	4.75929
APMAP	ENSG00000101474	protein_coding	0.566216	1.81593e-06	5.21071e-05	4.7526
RCAN3	ENSG00000117602	protein_coding	-0.60809	1.82087e-06	5.21741e-05	4.75007
KHDRBS2	ENSG00000112232	protein_coding	-0.583513	1.82781e-06	5.22979e-05	4.74652
TMEM263	ENSG00000151135	protein_coding	-0.537368	1.83259e-06	5.23598e-05	4.74408
BCL6	ENSG00000113916	protein_coding	0.755962	1.86633e-06	5.32476e-05	4.72707
TRAT1	ENSG00000163519	protein_coding	-0.78756	1.87957e-06	5.35175e-05	4.72047
ZNF749	ENSG00000186230	protein_coding	-0.453779	1.88114e-06	5.35175e-05	4.7197
ACKR3	ENSG00000144476	protein_coding	-0.482713	1.88981e-06	5.36878e-05	4.71541
AC010326.1	ENSG00000152454	protein_coding	-0.461202	1.90644e-06	5.40835e-05	4.70724
AC121334.3	ENSG00000285732	lncRNA	-0.632642	1.91718e-06	5.42343e-05	4.702
ZIK1	ENSG00000171649	protein_coding	-0.533937	1.91605e-06	5.42343e-05	4.70255
AC003681.1	ENSG00000279159	lncRNA	0.445755	1.93551e-06	5.452e-05	4.69313
AC093673.1	ENSG00000232533	lncRNA	0.450317	1.9336e-06	5.452e-05	4.69405
ASPH	ENSG00000198363	protein_coding	0.673595	1.93818e-06	5.452e-05	4.69184
C1QTNF3	ENSG00000082196	protein_coding	-0.470283	1.93292e-06	5.452e-05	4.69437
STXBP4	ENSG00000166263	protein_coding	-0.442941	1.94728e-06	5.46988e-05	4.68747
KLRF1	ENSG00000150045	protein_coding	-0.74862	1.95811e-06	5.49259e-05	4.6823
IFNGR2	ENSG00000159128	protein_coding	0.443836	1.97201e-06	5.52385e-05	4.6757
AC087763.2	ENSG00000270966	processed_pseudogene	-0.475953	1.98381e-06	5.54911e-05	4.67014
MXD1	ENSG00000059728	protein_coding	0.571676	1.9953e-06	5.57347e-05	4.66476
AL359962.2	ENSG00000273160	lncRNA	-0.562933	2.00281e-06	5.58032e-05	4.66126
TRBV14	ENSG00000275743	TR_V_gene	-0.613157	2.00334e-06	5.58032e-05	4.66101
AC124248.1	ENSG00000259704	lncRNA	0.506823	2.01629e-06	5.60859e-05	4.655
FAM98B	ENSG00000171262	protein_coding	-0.487215	2.02622e-06	5.62058e-05	4.65042
OLAH	ENSG00000152463	protein_coding	1.45536	2.02411e-06	5.62058e-05	4.65139
CYP1B1-AS1	ENSG00000232973	lncRNA	0.68096	2.03971e-06	5.62678e-05	4.64423
IFNG-AS1	ENSG00000255733	lncRNA	-0.782019	2.03247e-06	5.62678e-05	4.64755
KANTR	ENSG00000232593	protein_coding	-0.476491	2.03668e-06	5.62678e-05	4.64562
KLHL2	ENSG00000109466	protein_coding	0.624058	2.03777e-06	5.62678e-05	4.64512
FCMR	ENSG00000162894	protein_coding	-0.647081	2.04439e-06	5.63193e-05	4.64209
HLA-DMB	ENSG00000242574	protein_coding	-0.507786	2.05891e-06	5.65633e-05	4.6355
TRAJ50	ENSG00000211839	TR_J_gene	-0.574982	2.05776e-06	5.65633e-05	4.63602
WDR89	ENSG00000140006	protein_coding	-0.533231	2.06257e-06	5.65862e-05	4.63384
PRKCH	ENSG00000027075	protein_coding	-0.516555	2.07519e-06	5.68546e-05	4.62815
SHISAL2A	ENSG00000182183	protein_coding	-0.577148	2.08322e-06	5.69965e-05	4.62455
PIK3AP1	ENSG00000155629	protein_coding	0.464949	2.09359e-06	5.7202e-05	4.61992
ERLIN1	ENSG00000107566	protein_coding	0.609852	2.0983e-06	5.72524e-05	4.61783
VPS9D1	ENSG00000075399	protein_coding	0.560387	2.1101e-06	5.74958e-05	4.6126
RRAS2	ENSG00000133818	protein_coding	-0.539669	2.12668e-06	5.78688e-05	4.6053
CBLB	ENSG00000114423	protein_coding	-0.494212	2.16389e-06	5.88015e-05	4.58913
AC114744.1	ENSG00000214846	processed_pseudogene	0.575681	2.17231e-06	5.89502e-05	4.58551
JAK3	ENSG00000105639	protein_coding	0.564593	2.18151e-06	5.90178e-05	4.58157
PPAT	ENSG00000128059	protein_coding	-0.481952	2.18622e-06	5.90178e-05	4.57956
SPATA5	ENSG00000145375	protein_coding	-0.470856	2.18762e-06	5.90178e-05	4.57896
SYTL2	ENSG00000137501	protein_coding	-0.652612	2.18956e-06	5.90178e-05	4.57814
TRBV24-1	ENSG00000211750	TR_V_gene	-0.59171	2.18054e-06	5.90178e-05	4.58199
SPN	ENSG00000197471	protein_coding	-0.487093	2.19513e-06	5.90883e-05	4.57577
DPH6	ENSG00000134146	protein_coding	-0.567104	2.20398e-06	5.91673e-05	4.57202
SAMD3	ENSG00000164483	protein_coding	-0.650128	2.20286e-06	5.91673e-05	4.57249
AC245884.7	ENSG00000251431	unprocessed_pseudogene	0.479466	2.22077e-06	5.95169e-05	4.56495
TEF	ENSG00000167074	protein_coding	-0.441113	2.22296e-06	5.95169e-05	4.56403
TRGV9	ENSG00000211695	TR_V_gene	-0.693443	2.22651e-06	5.95323e-05	4.56254
AC245014.3	ENSG00000276216	lncRNA	-0.434584	2.2518e-06	5.99843e-05	4.55201
TRBV23-1	ENSG00000211749	TR_V_gene	-0.598966	2.24896e-06	5.99843e-05	4.55319
TREML2	ENSG00000112195	protein_coding	0.502753	2.25241e-06	5.99843e-05	4.55176
GOLGA8B	ENSG00000215252	protein_coding	-0.591375	2.27552e-06	6.04192e-05	4.54224
UVRAG-DT	ENSG00000255507	lncRNA	0.501627	2.27301e-06	6.04192e-05	4.54327
WSB1	ENSG00000109046	protein_coding	0.45563	2.27781e-06	6.04192e-05	4.54131
HCK	ENSG00000101336	protein_coding	0.45383	2.29771e-06	6.08665e-05	4.5332
RNU6-915P	ENSG00000201813	snRNA	-0.45197	2.31087e-06	6.1134e-05	4.52788
ADAMTS3	ENSG00000156140	protein_coding	0.73682	2.31809e-06	6.12216e-05	4.52497
KCNQ5-AS1	ENSG00000229154	lncRNA	-0.50444	2.3203e-06	6.12216e-05	4.52408
PPP1R3B	ENSG00000173281	protein_coding	0.592116	2.32352e-06	6.12258e-05	4.52279
HAUS1P1	ENSG00000251453	processed_pseudogene	0.536268	2.32767e-06	6.12544e-05	4.52112
SVIL	ENSG00000197321	protein_coding	0.48542	2.33628e-06	6.14003e-05	4.51768
AL136171.2	ENSG00000286071	lncRNA	0.499877	2.34891e-06	6.15704e-05	4.51266
FGD4	ENSG00000139132	protein_coding	0.492377	2.34765e-06	6.15704e-05	4.51316
ANKRD36	ENSG00000135976	protein_coding	-0.57092	2.35945e-06	6.17657e-05	4.50848
ZSCAN12	ENSG00000158691	protein_coding	-0.530955	2.36582e-06	6.18515e-05	4.50597
AC021646.2	ENSG00000270506	processed_pseudogene	0.496467	2.38857e-06	6.22835e-05	4.49705
MB21D2	ENSG00000180611	protein_coding	-0.561959	2.38727e-06	6.22835e-05	4.49756
PDZD4	ENSG00000067840	protein_coding	-0.707791	2.39357e-06	6.23325e-05	4.49511
AL359762.1	ENSG00000284882	lncRNA	0.490764	2.40961e-06	6.26292e-05	4.48888
GPR183	ENSG00000169508	protein_coding	-0.547083	2.41122e-06	6.26292e-05	4.48826
DNAH14	ENSG00000185842	protein_coding	0.429374	2.42566e-06	6.29224e-05	4.48269
APBB1	ENSG00000166313	protein_coding	-0.549486	2.44616e-06	6.3372e-05	4.47485
BIN1	ENSG00000136717	protein_coding	-0.52511	2.4665e-06	6.37253e-05	4.46713
CA6	ENSG00000131686	protein_coding	-0.739527	2.47147e-06	6.37253e-05	4.46526
SMARCD3	ENSG00000082014	protein_coding	0.531909	2.46709e-06	6.37253e-05	4.46691
STK39	ENSG00000198648	protein_coding	-0.438885	2.47254e-06	6.37253e-05	4.46485
CFLAR	ENSG00000003402	protein_coding	0.439511	2.48606e-06	6.39913e-05	4.45977
NUPR1	ENSG00000176046	protein_coding	0.720801	2.49136e-06	6.40453e-05	4.45779
PSTPIP2	ENSG00000152229	protein_coding	0.7074	2.49905e-06	6.41605e-05	4.45492
SBNO2	ENSG00000064932	protein_coding	0.592492	2.52907e-06	6.4848e-05	4.44379
FBXO32	ENSG00000156804	protein_coding	-0.442261	2.55587e-06	6.54513e-05	4.43397
AL353597.1	ENSG00000227920	lncRNA	-0.684746	2.56145e-06	6.54897e-05	4.43194
DBP	ENSG00000105516	protein_coding	-0.422349	2.5685e-06	6.54897e-05	4.42937
TRAJ6	ENSG00000211883	TR_J_gene	-0.622866	2.57047e-06	6.54897e-05	4.42866
TRBV13	ENSG00000276405	TR_V_gene	-0.610194	2.567e-06	6.54897e-05	4.42992
APOBEC3A	ENSG00000128383	protein_coding	0.568388	2.5812e-06	6.55615e-05	4.42478
BASP1	ENSG00000176788	protein_coding	0.716241	2.58312e-06	6.55615e-05	4.42409
BASP1-AS1	ENSG00000215196	lncRNA	0.808641	2.57795e-06	6.55615e-05	4.42595
AC090627.1	ENSG00000235300	lncRNA	-0.675788	2.59219e-06	6.57082e-05	4.42082
AL358334.2	ENSG00000258711	lncRNA	0.591047	2.60547e-06	6.59614e-05	4.41606
ESYT1	ENSG00000139641	protein_coding	-0.448139	2.61106e-06	6.59967e-05	4.41406
PRSS1	ENSG00000204983	protein_coding	-0.557081	2.61677e-06	6.59967e-05	4.41203
Z85996.2	ENSG00000285888	lncRNA	0.785402	2.61381e-06	6.59967e-05	4.41308
LINC01684	ENSG00000237484	lncRNA	-0.477393	2.63339e-06	6.63323e-05	4.40613
AL355390.1	ENSG00000177596	lncRNA	-0.657142	2.63725e-06	6.63458e-05	4.40477
AC009656.1	ENSG00000255060	lncRNA	-0.527996	2.65815e-06	6.67651e-05	4.39741
LPAL2	ENSG00000213071	transcribed_unprocessed_pseudogene	-0.557174	2.66059e-06	6.67651e-05	4.39655
AC008040.2	ENSG00000242583	processed_pseudogene	0.496445	2.66676e-06	6.6836e-05	4.3944
AL162615.1	ENSG00000237788	processed_pseudogene	0.43828	2.69486e-06	6.72123e-05	4.38463
MINDY4B	ENSG00000214237	protein_coding	0.704789	2.69521e-06	6.72123e-05	4.38451
PTPDC1	ENSG00000158079	protein_coding	-0.473554	2.69029e-06	6.72123e-05	4.38621
TRIM61	ENSG00000183439	protein_coding	-0.531337	2.69106e-06	6.72123e-05	4.38595
TRAV12-1	ENSG00000211785	TR_V_gene	-0.65628	2.70454e-06	6.72772e-05	4.38129
ZC3H12B	ENSG00000102053	protein_coding	-0.445656	2.70202e-06	6.72772e-05	4.38216
NSUN5P2	ENSG00000106133	transcribed_unprocessed_pseudogene	-0.428234	2.71637e-06	6.74875e-05	4.37722
ST6GALNAC3	ENSG00000184005	protein_coding	0.565023	2.7425e-06	6.79677e-05	4.36831
STAT5B	ENSG00000173757	protein_coding	0.428726	2.74214e-06	6.79677e-05	4.36843
AC002480.1	ENSG00000232759	lncRNA	-0.574378	2.75805e-06	6.81841e-05	4.36304
Z84492.1	ENSG00000271858	lncRNA	-0.381048	2.75695e-06	6.81841e-05	4.36341
GOLGA2P5	ENSG00000238105	transcribed_unprocessed_pseudogene	-0.454995	2.77303e-06	6.83965e-05	4.35799
TRAV14DV4	ENSG00000211792	TR_V_gene	-0.670097	2.77348e-06	6.83965e-05	4.35784
CC2D2A	ENSG00000048342	protein_coding	0.611615	2.78216e-06	6.8526e-05	4.35493
MTX1	ENSG00000173171	protein_coding	0.485249	2.79087e-06	6.85717e-05	4.35202
TRAJ14	ENSG00000211875	TR_J_gene	-0.655384	2.78874e-06	6.85717e-05	4.35273
BDH2	ENSG00000164039	protein_coding	-0.468518	2.8228e-06	6.91882e-05	4.34142
TRAV2	ENSG00000211776	TR_V_gene	-0.577232	2.82288e-06	6.91882e-05	4.3414
FAM151B	ENSG00000152380	protein_coding	0.434259	2.83278e-06	6.92611e-05	4.33814
SMKR1	ENSG00000240204	protein_coding	-0.437052	2.83134e-06	6.92611e-05	4.33861
ANKRD36C	ENSG00000174501	protein_coding	-0.613105	2.83809e-06	6.92791e-05	4.33639
RN7SL674P	ENSG00000239899	misc_RNA	0.559777	2.84044e-06	6.92791e-05	4.33562
AC099535.2	ENSG00000287348	lncRNA	-0.429228	2.88864e-06	7.01977e-05	4.31995
RARA-AS1	ENSG00000265666	lncRNA	0.531145	2.88599e-06	7.01977e-05	4.3208
SDR42E1	ENSG00000184860	protein_coding	-0.575961	2.88519e-06	7.01977e-05	4.32106
URI1	ENSG00000105176	protein_coding	-0.450222	2.89819e-06	7.03445e-05	4.31687
ZNF827	ENSG00000151612	protein_coding	-0.571555	2.94433e-06	7.13777e-05	4.30216
AC072022.2	ENSG00000285938	protein_coding	0.686603	2.95674e-06	7.14463e-05	4.29824
CCDC152	ENSG00000198865	protein_coding	-0.552293	2.95652e-06	7.14463e-05	4.29831
SUPT3H	ENSG00000196284	protein_coding	-0.490715	2.95801e-06	7.14463e-05	4.29784
ZNF229	ENSG00000278318	protein_coding	-0.542775	2.96145e-06	7.14463e-05	4.29676
RPS2P36	ENSG00000227032	processed_pseudogene	0.419066	2.96998e-06	7.15658e-05	4.29408
AL513128.3	ENSG00000286810	lncRNA	-0.541506	2.97881e-06	7.16379e-05	4.29132
PATJ	ENSG00000132849	protein_coding	-0.650078	2.98014e-06	7.16379e-05	4.2909
AL137139.2	ENSG00000286757	lncRNA	-0.499134	2.98822e-06	7.16599e-05	4.28838
CD82	ENSG00000085117	protein_coding	0.472956	2.98808e-06	7.16599e-05	4.28842
ANO9	ENSG00000185101	protein_coding	-0.573895	3.00926e-06	7.20782e-05	4.28185
NUDT10	ENSG00000122824	protein_coding	-0.481404	3.0242e-06	7.23493e-05	4.27723
LAPTM5	ENSG00000162511	protein_coding	0.406495	3.03685e-06	7.2565e-05	4.27335
KCNH7	ENSG00000184611	protein_coding	0.850567	3.0661e-06	7.31767e-05	4.26442
AP5B1	ENSG00000254470	protein_coding	0.553456	3.07316e-06	7.32578e-05	4.26228
ASAP1	ENSG00000153317	protein_coding	0.422467	3.08237e-06	7.33736e-05	4.25949
MTMR8	ENSG00000102043	protein_coding	-0.499642	3.08536e-06	7.33736e-05	4.25859
MDS2	ENSG00000197880	lncRNA	-0.610155	3.0896e-06	7.33872e-05	4.25731
AL391832.3	ENSG00000258082	lncRNA	0.518063	3.1053e-06	7.36727e-05	4.25259
CD63	ENSG00000135404	protein_coding	0.43433	3.12997e-06	7.37332e-05	4.24522
GOLGA2P10	ENSG00000255769	transcribed_unprocessed_pseudogene	-0.49763	3.12691e-06	7.37332e-05	4.24613
MYBL1	ENSG00000185697	protein_coding	-0.619508	3.11539e-06	7.37332e-05	4.24957
SELL	ENSG00000188404	protein_coding	0.524159	3.12376e-06	7.37332e-05	4.24707
ZDBF2	ENSG00000204186	protein_coding	-0.637592	3.12006e-06	7.37332e-05	4.24817
ZNF540	ENSG00000171817	protein_coding	-0.619399	3.12401e-06	7.37332e-05	4.247
AC244472.1	ENSG00000286831	lncRNA	-0.55569	3.14023e-06	7.38878e-05	4.24217
OMG	ENSG00000126861	protein_coding	0.417027	3.16775e-06	7.43603e-05	4.23405
ZNF501	ENSG00000186446	protein_coding	-0.463767	3.16546e-06	7.43603e-05	4.23472
PYHIN1	ENSG00000163564	protein_coding	-0.653687	3.17984e-06	7.45566e-05	4.2305
SFXN2	ENSG00000156398	protein_coding	-0.507733	3.20143e-06	7.48135e-05	4.2242
TFE3	ENSG00000068323	protein_coding	0.452853	3.19512e-06	7.48135e-05	4.22604
TRAJ12	ENSG00000211877	TR_J_gene	-0.64227	3.20202e-06	7.48135e-05	4.22403
MXD3	ENSG00000213347	protein_coding	0.4488	3.20645e-06	7.48296e-05	4.22274
TRAV9-2	ENSG00000211793	TR_V_gene	-0.643071	3.21054e-06	7.48377e-05	4.22156
AC098869.2	ENSG00000250893	lncRNA	0.521148	3.22331e-06	7.50325e-05	4.21786
ATP11A	ENSG00000068650	protein_coding	0.467924	3.2264e-06	7.50325e-05	4.21697
GSEC	ENSG00000280832	lncRNA	0.687186	3.2322e-06	7.50802e-05	4.21529
AC006946.1	ENSG00000235328	processed_pseudogene	0.610934	3.23682e-06	7.51001e-05	4.21397
CARD11	ENSG00000198286	protein_coding	-0.536784	3.25494e-06	7.54331e-05	4.20877
RPL30P7	ENSG00000244361	processed_pseudogene	0.522557	3.25963e-06	7.54543e-05	4.20743
OR52L2P	ENSG00000262980	unprocessed_pseudogene	0.562081	3.29761e-06	7.62452e-05	4.19664
AC073655.3	ENSG00000287237	lncRNA	0.531357	3.33574e-06	7.68822e-05	4.18594
NLRP12	ENSG00000142405	protein_coding	0.473637	3.33387e-06	7.68822e-05	4.18646
SLC12A5-AS1	ENSG00000204044	lncRNA	0.565619	3.33669e-06	7.68822e-05	4.18567
AC022784.5	ENSG00000254340	lncRNA	0.546785	3.37851e-06	7.76085e-05	4.17408
LIMA1	ENSG00000050405	protein_coding	-0.485714	3.37561e-06	7.76085e-05	4.17488
MCTP2	ENSG00000140563	protein_coding	0.54806	3.38037e-06	7.76085e-05	4.17356
PKIA-AS1	ENSG00000254266	lncRNA	-0.614758	3.38373e-06	7.76085e-05	4.17264
MTND4P14	ENSG00000236254	unprocessed_pseudogene	0.462162	3.39416e-06	7.77584e-05	4.16978
C15orf41	ENSG00000186073	protein_coding	-0.434076	3.42311e-06	7.8332e-05	4.16187
HHAT	ENSG00000054392	protein_coding	-0.454754	3.46209e-06	7.91335e-05	4.15133
WARS2-AS1	ENSG00000231365	lncRNA	-0.439164	3.47421e-06	7.92294e-05	4.14807
WDR17	ENSG00000150627	protein_coding	-0.447198	3.47027e-06	7.92294e-05	4.14913
P2RX1	ENSG00000108405	protein_coding	0.462051	3.47864e-06	7.92401e-05	4.14689
KRT8P3	ENSG00000254285	processed_pseudogene	0.58424	3.50271e-06	7.96071e-05	4.14047
MRPS33	ENSG00000090263	protein_coding	-0.454723	3.50149e-06	7.96071e-05	4.14079
HSPA1B	ENSG00000204388	protein_coding	0.518527	3.50802e-06	7.96373e-05	4.13906
IER3	ENSG00000137331	protein_coding	0.483802	3.51953e-06	7.98079e-05	4.13601
OR4D1	ENSG00000141194	protein_coding	-0.442603	3.52501e-06	7.98416e-05	4.13456
AL356274.1	ENSG00000274549	unprocessed_pseudogene	0.748353	3.53806e-06	8.00467e-05	4.13112
AL078604.2	ENSG00000237927	lncRNA	0.770254	3.55562e-06	8.01718e-05	4.12651
AL359962.1	ENSG00000233411	lncRNA	-0.487398	3.55502e-06	8.01718e-05	4.12667
TRAV10	ENSG00000211784	TR_V_gene	-0.54622	3.55263e-06	8.01718e-05	4.1273
AC063948.1	ENSG00000257543	lncRNA	-0.40141	3.58013e-06	8.04523e-05	4.12012
FAM153A	ENSG00000170074	protein_coding	-0.700267	3.57671e-06	8.04523e-05	4.12101
ITPKC	ENSG00000086544	protein_coding	0.486921	3.58009e-06	8.04523e-05	4.12013
IL24	ENSG00000162892	protein_coding	-0.625433	3.58447e-06	8.04595e-05	4.11899
EIF4E2P1	ENSG00000213384	processed_pseudogene	0.553182	3.60679e-06	8.0833e-05	4.11321
TRBC1	ENSG00000211751	TR_C_gene	-0.66716	3.61142e-06	8.0833e-05	4.11202
TRIM2	ENSG00000109654	protein_coding	-0.497074	3.61324e-06	8.0833e-05	4.11155
AL121839.2	ENSG00000260711	lncRNA	-0.632528	3.62382e-06	8.09792e-05	4.10883
NQO2	ENSG00000124588	protein_coding	0.528143	3.63639e-06	8.1081e-05	4.10561
S100A8	ENSG00000143546	protein_coding	0.838955	3.63648e-06	8.1081e-05	4.10558
ADCY4	ENSG00000129467	protein_coding	0.554415	3.65389e-06	8.13079e-05	4.10114
QPCT	ENSG00000115828	protein_coding	0.615116	3.65479e-06	8.13079e-05	4.10091
FAM86C1	ENSG00000158483	protein_coding	-0.42214	3.68813e-06	8.18675e-05	4.09246
USP44	ENSG00000136014	protein_coding	-0.617077	3.68514e-06	8.18675e-05	4.09321
TGFA	ENSG00000163235	protein_coding	0.681045	3.69724e-06	8.19787e-05	4.09016
ALS2CL	ENSG00000178038	protein_coding	-0.567438	3.70491e-06	8.20577e-05	4.08823
ETNK2	ENSG00000143845	protein_coding	-0.459794	3.7098e-06	8.20753e-05	4.087
AL354877.1	ENSG00000224067	processed_pseudogene	0.730411	3.72988e-06	8.24282e-05	4.08198
ABLIM2	ENSG00000163995	protein_coding	-0.487221	3.77068e-06	8.3238e-05	4.07186
AL109767.1	ENSG00000235785	lncRNA	-0.602274	3.79384e-06	8.36569e-05	4.06616
CSNK1G2P1	ENSG00000234534	processed_pseudogene	0.408668	3.79862e-06	8.36701e-05	4.06498
AL138778.1	ENSG00000286285	lncRNA	-0.568064	3.80705e-06	8.37012e-05	4.06292
PLEKHO2	ENSG00000241839	protein_coding	0.456348	3.8084e-06	8.37012e-05	4.06259
AC092329.4	ENSG00000284428	lncRNA	-0.470871	3.81996e-06	8.3771e-05	4.05977
DPY19L4	ENSG00000156162	protein_coding	-0.425029	3.81874e-06	8.3771e-05	4.06007
AL390066.2	ENSG00000224950	lncRNA	0.460779	3.83257e-06	8.39555e-05	4.0567
AKT3-IT1	ENSG00000228939	lncRNA	-0.526013	3.86191e-06	8.45057e-05	4.04961
QSOX1	ENSG00000116260	protein_coding	0.477439	3.87948e-06	8.47974e-05	4.04538
CCDC180	ENSG00000197816	protein_coding	-0.496298	3.89917e-06	8.51347e-05	4.04067
AC112496.1	ENSG00000241886	lncRNA	0.602833	3.90475e-06	8.51635e-05	4.03934
AC023830.3	ENSG00000278434	lncRNA	-0.397757	3.92331e-06	8.54752e-05	4.03493
AL442125.1	ENSG00000276248	lncRNA	0.446189	3.93571e-06	8.56521e-05	4.03199
AC079926.1	ENSG00000207171	snoRNA	0.534667	3.95786e-06	8.59611e-05	4.02677
AC106779.1	ENSG00000261302	lncRNA	-0.495464	3.95863e-06	8.59611e-05	4.02659
ZNF678	ENSG00000181450	protein_coding	-0.535536	3.96281e-06	8.59611e-05	4.02561
AC119673.1	ENSG00000201944	snoRNA	-0.411492	3.99039e-06	8.63887e-05	4.01915
MORC4	ENSG00000133131	protein_coding	-0.459161	3.99116e-06	8.63887e-05	4.01898
AL356274.2	ENSG00000279511	TEC	0.712359	4.00389e-06	8.64771e-05	4.01601
SLC16A10	ENSG00000112394	protein_coding	-0.679967	4.00091e-06	8.64771e-05	4.01671
SHOC1	ENSG00000165181	protein_coding	0.733501	4.0209e-06	8.67508e-05	4.01207
CASP4	ENSG00000196954	protein_coding	0.474385	4.06473e-06	8.7602e-05	4.00198
HCN2	ENSG00000099822	protein_coding	-0.419168	4.10086e-06	8.82854e-05	3.99375
GZMK	ENSG00000113088	protein_coding	-0.821147	4.1192e-06	8.84899e-05	3.98959
TOM1	ENSG00000100284	protein_coding	0.427317	4.11796e-06	8.84899e-05	3.98988
AC093227.1	ENSG00000267152	lncRNA	-0.427986	4.14941e-06	8.84995e-05	3.9828
AC107027.3	ENSG00000261167	lncRNA	-0.416504	4.15183e-06	8.84995e-05	3.98225
ITPRIP	ENSG00000148841	protein_coding	0.445262	4.14969e-06	8.84995e-05	3.98273
NCALD	ENSG00000104490	protein_coding	-0.593483	4.15505e-06	8.84995e-05	3.98153
RN7SL396P	ENSG00000244642	misc_RNA	0.539574	4.14749e-06	8.84995e-05	3.98323
RNU6-1149P	ENSG00000252619	snRNA	-0.407922	4.13936e-06	8.84995e-05	3.98505
SLC9A8	ENSG00000197818	protein_coding	0.493854	4.14621e-06	8.84995e-05	3.98352
SNX27	ENSG00000143376	protein_coding	0.485409	4.12879e-06	8.84995e-05	3.98743
CTSD	ENSG00000117984	protein_coding	0.499489	4.17522e-06	8.8747e-05	3.97703
PCSK9	ENSG00000169174	protein_coding	0.988494	4.17554e-06	8.8747e-05	3.97696
TTC39B	ENSG00000155158	protein_coding	-0.427689	4.20233e-06	8.92214e-05	3.97101
FAM110C	ENSG00000184731	protein_coding	-0.539961	4.20738e-06	8.92339e-05	3.96989
CCDC102A	ENSG00000135736	protein_coding	-0.500439	4.21911e-06	8.93878e-05	3.9673
AC106865.2	ENSG00000287216	lncRNA	0.479903	4.24866e-06	8.99186e-05	3.96081
AC005041.4	ENSG00000286623	lncRNA	-0.372138	4.26151e-06	9.00407e-05	3.958
TRUB1	ENSG00000165832	protein_coding	-0.438384	4.26343e-06	9.00407e-05	3.95758
DOK3	ENSG00000146094	protein_coding	0.576639	4.27129e-06	9.01116e-05	3.95586
AC073585.1	ENSG00000255624	transcribed_processed_pseudogene	-0.503762	4.28166e-06	9.02352e-05	3.95361
LAX1	ENSG00000122188	protein_coding	-0.547507	4.29066e-06	9.03297e-05	3.95166
APBA2	ENSG00000034053	protein_coding	-0.592082	4.29996e-06	9.03964e-05	3.94964
JUNB	ENSG00000171223	protein_coding	0.489568	4.30287e-06	9.03964e-05	3.94901
AC092745.2	ENSG00000256552	transcribed_processed_pseudogene	0.561648	4.32805e-06	9.08299e-05	3.94359
SEMA4A	ENSG00000196189	protein_coding	0.563338	4.34472e-06	9.10843e-05	3.94001
AGBL3	ENSG00000146856	protein_coding	-0.412674	4.36025e-06	9.13141e-05	3.93669
CRPPA-AS1	ENSG00000229688	lncRNA	-0.408675	4.36779e-06	9.13607e-05	3.93508
TRBJ1-6	ENSG00000282780	TR_J_gene	-0.538289	4.37161e-06	9.13607e-05	3.93427
AC092053.6	ENSG00000287958	lncRNA	-0.55067	4.38352e-06	9.1514e-05	3.93174
LINC01806	ENSG00000227403	lncRNA	-0.527484	4.40989e-06	9.19686e-05	3.92616
EPHA4	ENSG00000116106	protein_coding	-0.659005	4.43251e-06	9.2344e-05	3.9214
GRINA	ENSG00000178719	protein_coding	0.703395	4.46402e-06	9.29037e-05	3.91481
HAUS5	ENSG00000249115	protein_coding	-0.467511	4.47788e-06	9.30952e-05	3.91193
ADAMTSL5	ENSG00000185761	protein_coding	-0.480207	4.48802e-06	9.32091e-05	3.90982
TRAJ17	ENSG00000211872	TR_J_gene	-0.605621	4.50275e-06	9.34181e-05	3.90678
ELOVL4	ENSG00000118402	protein_coding	-0.574662	4.51776e-06	9.36324e-05	3.90368
PRKCQ	ENSG00000065675	protein_coding	-0.432068	4.5405e-06	9.40061e-05	3.89901
RTTN	ENSG00000176225	protein_coding	-0.417597	4.57241e-06	9.45689e-05	3.8925
AC019205.1	ENSG00000229852	lncRNA	-0.457531	4.58078e-06	9.46442e-05	3.8908
RN7SKP1	ENSG00000202395	misc_RNA	0.704674	4.59301e-06	9.4799e-05	3.88832
LINC00544	ENSG00000122043	lncRNA	-0.555769	4.61396e-06	9.51332e-05	3.88408
FOXC1	ENSG00000054598	protein_coding	0.598994	4.64776e-06	9.57314e-05	3.8773
CD58	ENSG00000116815	protein_coding	0.398515	4.66164e-06	9.582e-05	3.87452
XPO6	ENSG00000169180	protein_coding	0.49226	4.6586e-06	9.582e-05	3.87513
GK-AS1	ENSG00000243055	lncRNA	0.590646	4.67539e-06	9.6004e-05	3.87178
ATP11AUN	ENSG00000197595	lncRNA	0.399872	4.68544e-06	9.61115e-05	3.86979
CLEC4D	ENSG00000166527	protein_coding	0.721756	4.70646e-06	9.64439e-05	3.86562
NUCKS1	ENSG00000069275	protein_coding	-0.430285	4.72189e-06	9.6661e-05	3.86258
RPS12P24	ENSG00000230283	processed_pseudogene	0.657303	4.72913e-06	9.67102e-05	3.86116
ABHD17C	ENSG00000136379	protein_coding	0.455076	4.74634e-06	9.6864e-05	3.85778
TRBV5-7	ENSG00000211731	TR_V_gene	-0.473588	4.74631e-06	9.6864e-05	3.85778
TRAJ22	ENSG00000211867	TR_J_gene	-0.66642	4.78025e-06	9.74567e-05	3.85116
GAPDHP60	ENSG00000248180	processed_pseudogene	0.474847	4.78841e-06	9.75236e-05	3.84957
FGR	ENSG00000000938	protein_coding	0.448923	4.82508e-06	9.77727e-05	3.84248
H3P36	ENSG00000236534	processed_pseudogene	0.418178	4.81716e-06	9.77727e-05	3.84401
METTL7B	ENSG00000170439	protein_coding	0.811478	4.82031e-06	9.77727e-05	3.8434
PRSS2	ENSG00000275896	protein_coding	-0.540378	4.80582e-06	9.77727e-05	3.8462
TRBV6-7	ENSG00000253188	TR_V_gene	-0.465253	4.81815e-06	9.77727e-05	3.84381
PHLDB2	ENSG00000144824	protein_coding	-0.556581	4.93666e-06	9.99324e-05	3.82122
AC139769.2	ENSG00000267924	lncRNA	-0.501427	4.94502e-06	0.0001	3.81965
SEZ6L	ENSG00000100095	protein_coding	-0.588878	4.95556e-06	0.000100112	3.81767
IL21R	ENSG00000103522	protein_coding	-0.53334	4.97813e-06	0.000100467	3.81344
TSPYL2	ENSG00000184205	protein_coding	-0.442187	5.0217e-06	0.000101244	3.80534
AL929472.4	ENSG00000235673	processed_pseudogene	0.410244	5.05266e-06	0.000101766	3.79962
AL078644.1	ENSG00000261024	transcribed_processed_pseudogene	0.481016	5.07227e-06	0.00010191	3.79602
PDYN-AS1	ENSG00000233896	lncRNA	0.547564	5.07514e-06	0.00010191	3.7955
SORT1	ENSG00000134243	protein_coding	0.515117	5.07244e-06	0.00010191	3.79599
HDAC4	ENSG00000068024	protein_coding	0.455296	5.08489e-06	0.000102004	3.79371
AC008760.1	ENSG00000269680	lncRNA	-0.434583	5.13728e-06	0.000102951	3.78418
AC127521.1	ENSG00000262823	lncRNA	-0.582668	5.17388e-06	0.000103581	3.77758
TPRG1	ENSG00000188001	protein_coding	-0.445505	5.20878e-06	0.000104176	3.77133
RPL7AP53	ENSG00000235962	processed_pseudogene	-0.528742	5.24339e-06	0.000104763	3.76518
THEMIS	ENSG00000172673	protein_coding	-0.660944	5.2953e-06	0.000105695	3.75602
HOOK1	ENSG00000134709	protein_coding	-0.655894	5.33003e-06	0.000106282	3.74994
EVA1C	ENSG00000166979	protein_coding	-0.408551	5.34501e-06	0.000106474	3.74733
CRTAM	ENSG00000109943	protein_coding	-0.579772	5.36423e-06	0.000106751	3.744
B3GNT8	ENSG00000177191	protein_coding	0.476663	5.39732e-06	0.000107196	3.73828
PA2G4P4	ENSG00000230457	processed_pseudogene	-0.422396	5.39558e-06	0.000107196	3.73858
LDOC1	ENSG00000182195	protein_coding	-0.448751	5.43185e-06	0.000107775	3.73235
AC020703.1	ENSG00000249309	lncRNA	0.690356	5.43868e-06	0.000107803	3.73119
CLECL1	ENSG00000184293	protein_coding	-0.57852	5.45026e-06	0.000107926	3.72921
AC010501.2	ENSG00000271714	lncRNA	-0.390668	5.48348e-06	0.00010837	3.72356
LANCL1-AS1	ENSG00000234281	lncRNA	-0.440671	5.48353e-06	0.00010837	3.72355
FZD3	ENSG00000104290	protein_coding	-0.504302	5.50521e-06	0.000108691	3.71988
TRBV22-1	ENSG00000240578	TR_V_pseudogene	-0.461777	5.51096e-06	0.000108691	3.71891
ZNF461	ENSG00000197808	protein_coding	-0.396443	5.51607e-06	0.000108691	3.71805
AC009229.4	ENSG00000280276	TEC	0.591478	5.57693e-06	0.00010958	3.70785
LINC02731	ENSG00000204241	lncRNA	-0.47757	5.57764e-06	0.00010958	3.70774
MAGEE1	ENSG00000198934	protein_coding	-0.496218	5.56974e-06	0.00010958	3.70905
B4GAT1	ENSG00000174684	protein_coding	-0.430216	5.61855e-06	0.000110258	3.70094
BSND	ENSG00000162399	protein_coding	0.902616	5.6256e-06	0.000110258	3.69978
TRBV7-7	ENSG00000253291	TR_V_gene	-0.465193	5.63417e-06	0.000110258	3.69836
ZFYVE28	ENSG00000159733	protein_coding	-0.511268	5.63371e-06	0.000110258	3.69844
P3H4	ENSG00000141696	protein_coding	-0.422537	5.64043e-06	0.000110272	3.69733
RTL6	ENSG00000188636	protein_coding	-0.420307	5.65138e-06	0.000110379	3.69553
AC005332.2	ENSG00000267731	lncRNA	-0.561678	5.65734e-06	0.000110387	3.69455
TRBJ2-3	ENSG00000211767	TR_J_gene	-0.487042	5.67197e-06	0.000110457	3.69215
ZNF571	ENSG00000180479	protein_coding	-0.485583	5.66951e-06	0.000110457	3.69255
DNAH17	ENSG00000187775	protein_coding	0.709203	5.68897e-06	0.00011068	3.68937
TRBV5-1	ENSG00000211734	TR_V_gene	-0.698632	5.71059e-06	0.000110885	3.68584
TRIM21	ENSG00000132109	protein_coding	0.414224	5.70907e-06	0.000110885	3.68609
ZNF391	ENSG00000124613	protein_coding	-0.504537	5.72342e-06	0.000111027	3.68376
AIM2	ENSG00000163568	protein_coding	0.694197	5.75775e-06	0.000111369	3.6782
IL17RA	ENSG00000177663	protein_coding	0.546134	5.74849e-06	0.000111369	3.67969
SUCLG2-AS1	ENSG00000241316	lncRNA	-0.48592	5.75599e-06	0.000111369	3.67848
TRAV8-2	ENSG00000211786	TR_V_gene	-0.550505	5.786e-06	0.000111807	3.67365
AC010609.1	ENSG00000253980	lncRNA	-0.58105	5.81824e-06	0.000112321	3.66849
AC123567.2	ENSG00000258035	lncRNA	0.526951	5.8467e-06	0.000112653	3.66395
RN7SL862P	ENSG00000242651	misc_RNA	0.432259	5.84529e-06	0.000112653	3.66418
PLBD1	ENSG00000121316	protein_coding	0.567225	5.85343e-06	0.000112674	3.66288
MPRIP	ENSG00000133030	protein_coding	-0.395512	5.90198e-06	0.0001135	3.65521
AC037459.4	ENSG00000287467	lncRNA	-0.455816	5.91693e-06	0.000113678	3.65286
LRRIQ3	ENSG00000162620	protein_coding	-0.531334	5.92577e-06	0.000113738	3.65147
RAB7A	ENSG00000075785	protein_coding	0.449995	5.95523e-06	0.000114194	3.64686
SYN2	ENSG00000157152	protein_coding	0.531953	5.96696e-06	0.00011431	3.64503
AC091429.1	ENSG00000242477	processed_pseudogene	-0.375333	5.99265e-06	0.000114621	3.64104
HORMAD2-AS1	ENSG00000227117	lncRNA	0.405782	5.99883e-06	0.000114621	3.64008
LILRB3	ENSG00000204577	protein_coding	0.631058	6.00041e-06	0.000114621	3.63984
AC021188.1	ENSG00000230747	lncRNA	-0.456867	6.02131e-06	0.000114911	3.63661
RN7SKP97	ENSG00000222898	misc_RNA	0.595588	6.05918e-06	0.000115523	3.63078
OR7E7P	ENSG00000238228	unprocessed_pseudogene	-0.455065	6.06577e-06	0.000115539	3.62977
SUGT1P4-STRA6LP	ENSG00000254876	lncRNA	-0.468668	6.07162e-06	0.00011554	3.62888
AL158011.2	ENSG00000286655	lncRNA	-0.438878	6.16288e-06	0.000117165	3.61501
FBXO4	ENSG00000151876	protein_coding	-0.398778	6.21511e-06	0.000118046	3.60717
RAB31	ENSG00000168461	protein_coding	0.458309	6.22337e-06	0.000118091	3.60594
OXCT1	ENSG00000083720	protein_coding	-0.50043	6.2798e-06	0.000119048	3.59755
THOC3	ENSG00000051596	protein_coding	-0.415191	6.37367e-06	0.000120713	3.58377
EEF1A1	ENSG00000156508	protein_coding	-0.411214	6.40999e-06	0.000121172	3.57849
TRAJ10	ENSG00000211879	TR_J_gene	-0.631538	6.40904e-06	0.000121172	3.57863
KCNG2	ENSG00000178342	protein_coding	0.494995	6.49387e-06	0.000122642	3.56641
TRBJ1-1	ENSG00000282320	TR_J_gene	-0.503511	6.50836e-06	0.000122799	3.56434
RRAGD	ENSG00000025039	protein_coding	0.45481	6.51823e-06	0.00012287	3.56294
LINC00649	ENSG00000237945	lncRNA	-0.58281	6.533e-06	0.000123032	3.56083
AC090948.3	ENSG00000272529	lncRNA	-0.508709	6.59476e-06	0.000123918	3.55209
CYP19A1	ENSG00000137869	protein_coding	0.821214	6.59864e-06	0.000123918	3.55155
NPL	ENSG00000135838	protein_coding	0.415354	6.5967e-06	0.000123918	3.55182
NDRG2	ENSG00000165795	protein_coding	-0.385058	6.60685e-06	0.000123956	3.55039
GPRASP2	ENSG00000158301	protein_coding	-0.423597	6.63135e-06	0.000124102	3.54695
PLAUR	ENSG00000011422	protein_coding	0.479987	6.63327e-06	0.000124102	3.54668
ZNF404	ENSG00000176222	protein_coding	-0.395398	6.63004e-06	0.000124102	3.54714
CSNK1A1L	ENSG00000180138	protein_coding	0.684961	6.64327e-06	0.000124173	3.54528
SIRPB1	ENSG00000101307	protein_coding	0.607423	6.66239e-06	0.000124414	3.54262
EXPH5	ENSG00000110723	protein_coding	-0.482178	6.676e-06	0.000124552	3.54072
AMOT	ENSG00000126016	protein_coding	-0.44785	6.68963e-06	0.000124665	3.53883
TRAJ47	ENSG00000211842	TR_J_gene	-0.528614	6.69452e-06	0.000124665	3.53815
SPATA20P1	ENSG00000231123	processed_pseudogene	0.662566	6.72269e-06	0.000125073	3.53425
NSUN7	ENSG00000179299	protein_coding	0.65637	6.7356e-06	0.000125197	3.53246
KRT128P	ENSG00000258120	unprocessed_pseudogene	-0.678525	6.75764e-06	0.00012549	3.52943
DUSP1	ENSG00000120129	protein_coding	0.712817	6.78304e-06	0.000125845	3.52595
TSEN54	ENSG00000182173	protein_coding	-0.469814	6.81643e-06	0.000126347	3.52139
RDH13	ENSG00000160439	protein_coding	-0.409308	6.83601e-06	0.000126593	3.51872
TRAV23DV6	ENSG00000211803	TR_V_gene	-0.637869	6.85833e-06	0.000126889	3.51569
GZMAP1	ENSG00000249454	unprocessed_pseudogene	-0.468356	6.88183e-06	0.000126985	3.51252
TMEM30B	ENSG00000182107	protein_coding	-0.456939	6.87795e-06	0.000126985	3.51304
UNG	ENSG00000076248	protein_coding	-0.426073	6.88258e-06	0.000126985	3.51241
ZNF563	ENSG00000188868	protein_coding	-0.388172	6.8894e-06	0.000126994	3.5115
SLFN12L	ENSG00000205045	protein_coding	-0.504066	6.93112e-06	0.000127645	3.50589
AC106795.1	ENSG00000170089	transcribed_unprocessed_pseudogene	-0.453856	6.94561e-06	0.000127677	3.50395
JAKMIP2-AS1	ENSG00000280780	lncRNA	-0.500354	6.94522e-06	0.000127677	3.504
ZNF154	ENSG00000179909	protein_coding	-0.579511	6.99577e-06	0.000128481	3.49727
MYRIP	ENSG00000170011	protein_coding	0.427657	7.03915e-06	0.000129159	3.49153
RN7SL552P	ENSG00000239466	misc_RNA	0.467552	7.05952e-06	0.000129414	3.48884
FLOT2	ENSG00000132589	protein_coding	0.607122	7.07939e-06	0.000129541	3.48623
SEMA5A	ENSG00000112902	protein_coding	-0.543709	7.07928e-06	0.000129541	3.48625
TRAJ1	ENSG00000211888	TR_J_gene	-0.556316	7.10218e-06	0.000129839	3.48325
PDCL3P2	ENSG00000282989	processed_pseudogene	-0.589488	7.12413e-06	0.000130121	3.48038
DNAJC24	ENSG00000170946	protein_coding	-0.428314	7.18745e-06	0.000131038	3.47216
SGSM1	ENSG00000167037	protein_coding	-0.541359	7.18226e-06	0.000131038	3.47283
AC024267.4	ENSG00000264304	lncRNA	0.446125	7.20925e-06	0.000131197	3.46935
AC079209.1	ENSG00000253214	lncRNA	0.709856	7.20363e-06	0.000131197	3.47008
TRAJ21	ENSG00000211868	TR_J_gene	-0.636781	7.22334e-06	0.000131333	3.46754
TRAJ56	ENSG00000211835	TR_J_gene	-0.529978	7.23751e-06	0.000131472	3.46572
CCDC102B	ENSG00000150636	protein_coding	-0.445908	7.29828e-06	0.000132455	3.45795
RN7SL128P	ENSG00000240869	misc_RNA	0.564934	7.3322e-06	0.000132881	3.45365
TOX4P1	ENSG00000248697	processed_pseudogene	0.496664	7.33501e-06	0.000132881	3.45329
IFI16	ENSG00000163565	protein_coding	0.427386	7.34529e-06	0.000132946	3.45199
LMTK2	ENSG00000164715	protein_coding	0.460424	7.39349e-06	0.000133698	3.44592
TXN	ENSG00000136810	protein_coding	0.556313	7.45361e-06	0.000134663	3.4384
NAP1L2	ENSG00000186462	protein_coding	-0.561318	7.46653e-06	0.000134775	3.43679
AC023813.2	ENSG00000260033	processed_pseudogene	0.40251	7.49253e-06	0.000134969	3.43357
LINC01093	ENSG00000249173	lncRNA	0.818593	7.48588e-06	0.000134969	3.43439
PKD1L3	ENSG00000277481	protein_coding	0.454964	7.49752e-06	0.000134969	3.43295
EHD1	ENSG00000110047	protein_coding	0.417117	7.56681e-06	0.000135849	3.42441
FCER1A	ENSG00000179639	protein_coding	-1.01769	7.56635e-06	0.000135849	3.42446
PFKFB4	ENSG00000114268	protein_coding	0.491071	7.56585e-06	0.000135849	3.42452
AC004585.1	ENSG00000266088	lncRNA	-0.537049	7.58065e-06	0.000135976	3.42271
LINC01237	ENSG00000233806	lncRNA	-0.514031	7.62944e-06	0.000136606	3.41675
LRRC37A9P	ENSG00000271013	processed_pseudogene	-0.576556	7.62465e-06	0.000136606	3.41734
TIGIT	ENSG00000181847	protein_coding	-0.656846	7.64976e-06	0.000136847	3.41428
NECTIN3	ENSG00000177707	protein_coding	-0.570675	7.66053e-06	0.000136917	3.41298
LIPM	ENSG00000173239	protein_coding	0.971935	7.68131e-06	0.000137008	3.41046
RPL13A	ENSG00000142541	protein_coding	-0.397421	7.68614e-06	0.000137008	3.40988
ZNF204P	ENSG00000204789	processed_pseudogene	-0.710829	7.68479e-06	0.000137008	3.41004
GRAMD1A	ENSG00000089351	protein_coding	0.531233	7.72105e-06	0.000137508	3.40567
AL133410.1	ENSG00000227388	lncRNA	-0.459632	7.73195e-06	0.000137579	3.40436
AC067945.3	ENSG00000231858	lncRNA	-0.420873	7.75779e-06	0.000137794	3.40127
ZC3H12D	ENSG00000178199	protein_coding	-0.447676	7.75555e-06	0.000137794	3.40153
MROCKI	ENSG00000227502	lncRNA	0.571986	7.79222e-06	0.000138283	3.39715
AC006369.1	ENSG00000236213	lncRNA	-0.587054	7.80224e-06	0.000138338	3.39596
LINC02576	ENSG00000232613	lncRNA	-0.448047	7.80992e-06	0.000138351	3.39505
DANCR	ENSG00000226950	lncRNA	-0.431203	7.82276e-06	0.000138456	3.39352
MARCHF9	ENSG00000139266	protein_coding	-0.445872	7.83645e-06	0.000138576	3.3919
AC017104.1	ENSG00000224376	lncRNA	-0.417146	7.85621e-06	0.000138802	3.38956
FAM102A	ENSG00000167106	protein_coding	-0.755748	7.89774e-06	0.000139413	3.38467
CHST15	ENSG00000182022	protein_coding	0.477978	7.92112e-06	0.000139702	3.38192
KIF3C	ENSG00000084731	protein_coding	0.521484	7.94565e-06	0.000139979	3.37905
LONRF3	ENSG00000175556	protein_coding	0.46038	7.95079e-06	0.000139979	3.37845
HLA-DPA1	ENSG00000231389	protein_coding	-0.493312	8.02153e-06	0.000140976	3.37023
LINC01993	ENSG00000204277	lncRNA	0.685573	8.01587e-06	0.000140976	3.37089
SPTLC2	ENSG00000100596	protein_coding	0.377606	8.06082e-06	0.000141542	3.3657
AC007271.1	ENSG00000287771	lncRNA	0.865764	8.11316e-06	0.00014201	3.35969
AC083806.2	ENSG00000274554	lncRNA	-0.403896	8.11586e-06	0.00014201	3.35938
AP001429.1	ENSG00000270116	lncRNA	-0.407074	8.10439e-06	0.00014201	3.36069
STX18-AS1	ENSG00000247708	lncRNA	-0.489838	8.10107e-06	0.00014201	3.36107
STARD9	ENSG00000159433	protein_coding	-0.514366	8.14394e-06	0.000142377	3.35617
FAM160B1	ENSG00000151553	protein_coding	0.411245	8.16248e-06	0.000142576	3.35406
RPS27AP9	ENSG00000242706	processed_pseudogene	0.424554	8.17521e-06	0.000142674	3.35262
LINC01485	ENSG00000254211	lncRNA	0.635723	8.1888e-06	0.000142786	3.35108
ZNF662	ENSG00000182983	protein_coding	-0.56236	8.20381e-06	0.000142924	3.34938
MBOAT2	ENSG00000143797	protein_coding	0.475749	8.23329e-06	0.000143312	3.34605
AC114878.2	ENSG00000270911	processed_pseudogene	0.449521	8.26421e-06	0.00014367	3.34257
ADAMTS10	ENSG00000142303	protein_coding	-0.644075	8.27541e-06	0.00014367	3.34131
TRIB2	ENSG00000071575	protein_coding	-0.558769	8.27025e-06	0.00014367	3.34189
AL158136.1	ENSG00000287789	lncRNA	-0.686043	8.30496e-06	0.000143833	3.338
ODCP	ENSG00000244556	processed_pseudogene	0.406962	8.29697e-06	0.000143833	3.3389
TRBV12-4	ENSG00000276953	TR_V_gene	-0.598199	8.30633e-06	0.000143833	3.33785
LMNB1	ENSG00000113368	protein_coding	0.564577	8.36778e-06	0.000144771	3.33101
ZNF141	ENSG00000131127	protein_coding	-0.459839	8.39628e-06	0.000145139	3.32785
TRAF1	ENSG00000056558	protein_coding	-0.455409	8.4098e-06	0.000145247	3.32636
RBM47	ENSG00000163694	protein_coding	0.534473	8.43744e-06	0.000145599	3.32332
MRTFB	ENSG00000186260	protein_coding	-0.440059	8.4479e-06	0.000145653	3.32216
AC092376.3	ENSG00000285918	lncRNA	-0.385279	8.48232e-06	0.000145995	3.31839
AC093627.22	ENSG00000287883	lncRNA	0.474211	8.47503e-06	0.000145995	3.31919
AL049833.3	ENSG00000280070	TEC	-0.396843	8.50848e-06	0.00014632	3.31553
KIF3A	ENSG00000131437	protein_coding	-0.429593	8.54277e-06	0.000146756	3.3118
LINC02595	ENSG00000231566	lncRNA	-0.458663	8.54852e-06	0.000146756	3.31118
CSRNP1	ENSG00000144655	protein_coding	0.471035	8.59328e-06	0.000147398	3.30633
AP002026.1	ENSG00000246090	lncRNA	-0.451514	8.61358e-06	0.000147619	3.30414
AC136475.7	ENSG00000270030	lncRNA	0.537373	8.64001e-06	0.000147819	3.3013
MTCYBP35	ENSG00000251340	processed_pseudogene	0.468429	8.63898e-06	0.000147819	3.30141
ZNF813	ENSG00000198346	protein_coding	-0.440641	8.64946e-06	0.000147854	3.30028
AL096816.1	ENSG00000280135	TEC	-0.477838	8.66578e-06	0.00014788	3.29853
LINC01725	ENSG00000233008	lncRNA	-0.552635	8.66211e-06	0.00014788	3.29893
NOC3L	ENSG00000173145	protein_coding	-0.466972	8.68371e-06	0.00014806	3.29662
RWDD2A	ENSG00000013392	protein_coding	-0.403169	8.71226e-06	0.00014842	3.29357
PTPRK	ENSG00000152894	protein_coding	-0.675242	8.7241e-06	0.000148495	3.29231
AL031123.2	ENSG00000261211	lncRNA	0.68479	8.74047e-06	0.000148633	3.29057
LINC01352	ENSG00000238078	lncRNA	0.475309	8.74707e-06	0.000148633	3.28987
NECAB1	ENSG00000123119	protein_coding	0.781343	8.80055e-06	0.000149415	3.28421
TRAV19	ENSG00000211799	TR_V_gene	-0.65695	8.81462e-06	0.000149527	3.28273
CKMT2-AS1	ENSG00000247572	lncRNA	-0.403522	8.83757e-06	0.000149673	3.28032
PGLYRP1	ENSG00000008438	protein_coding	0.676117	8.83819e-06	0.000149673	3.28025
AC011773.1	ENSG00000254208	lncRNA	-0.477511	8.85812e-06	0.000149884	3.27816
AP003110.1	ENSG00000255084	lncRNA	-0.408564	8.90446e-06	0.000150363	3.27332
NFATC2	ENSG00000101096	protein_coding	-0.554098	8.90688e-06	0.000150363	3.27307
PDSS1P1	ENSG00000182347	processed_pseudogene	0.434412	8.90899e-06	0.000150363	3.27285
AC132872.2	ENSG00000264548	lncRNA	0.491441	8.9171e-06	0.000150373	3.27201
LINC01907	ENSG00000226125	lncRNA	0.511778	8.93084e-06	0.000150478	3.27058
ADAMTS4	ENSG00000158859	protein_coding	-0.489555	8.96204e-06	0.000150876	3.26734
MTND5P32	ENSG00000259379	processed_pseudogene	0.688967	8.97057e-06	0.000150893	3.26646
PACSIN2	ENSG00000100266	protein_coding	0.400957	9.01277e-06	0.000151475	3.2621
DDX60L	ENSG00000181381	protein_coding	0.565767	9.0214e-06	0.000151493	3.26122
AC093865.1	ENSG00000273118	lncRNA	-0.444681	9.06655e-06	0.000151741	3.25659
AL161430.1	ENSG00000286334	lncRNA	-0.413238	9.06097e-06	0.000151741	3.25716
HAR1A	ENSG00000225978	lncRNA	-0.470215	9.0461e-06	0.000151741	3.25868
OR7E126P	ENSG00000254593	unprocessed_pseudogene	-0.426886	9.05499e-06	0.000151741	3.25777
ZNF570	ENSG00000171827	protein_coding	-0.402309	9.0809e-06	0.000151855	3.25512
PTGFR	ENSG00000122420	protein_coding	0.784367	9.13149e-06	0.000152573	3.24996
AL359922.3	ENSG00000279670	TEC	-0.395586	9.13933e-06	0.000152576	3.24917
CFAP97	ENSG00000164323	protein_coding	-0.467046	9.18806e-06	0.000153262	3.24423
AKAP6	ENSG00000151320	protein_coding	-0.682894	9.20113e-06	0.000153352	3.24292
AC004890.2	ENSG00000244560	transcribed_unprocessed_pseudogene	-0.48093	9.24079e-06	0.000153863	3.23892
ZSWIM5	ENSG00000162415	protein_coding	-0.494142	9.24715e-06	0.000153863	3.23829
AL358334.3	ENSG00000258745	lncRNA	0.483353	9.27861e-06	0.000154258	3.23514
FCGR2A	ENSG00000143226	protein_coding	0.506135	9.30978e-06	0.000154647	3.23202
KANK3	ENSG00000186994	protein_coding	-0.359009	9.37324e-06	0.000155572	3.22572
ATF7IP2	ENSG00000166669	protein_coding	-0.431691	9.40075e-06	0.000155802	3.223
KLRG1	ENSG00000139187	protein_coding	-0.675506	9.41042e-06	0.000155802	3.22205
LINC02596	ENSG00000233431	lncRNA	0.590967	9.40382e-06	0.000155802	3.2227
CREB5	ENSG00000146592	protein_coding	0.54186	9.41879e-06	0.000155811	3.22122
AC015961.1	ENSG00000267651	lncRNA	-0.424141	9.44473e-06	0.000155876	3.21867
AL049634.1	ENSG00000242324	unprocessed_pseudogene	0.448378	9.44607e-06	0.000155876	3.21854
CDA	ENSG00000158825	protein_coding	0.607077	9.44256e-06	0.000155876	3.21889
MLLT10P1	ENSG00000238151	processed_pseudogene	-0.421782	9.47655e-06	0.00015625	3.21555
ANKS6	ENSG00000165138	protein_coding	-0.455485	9.57941e-06	0.000157816	3.20554
AL033519.2	ENSG00000218749	processed_pseudogene	0.697951	9.62073e-06	0.000158366	3.20155
CD3E	ENSG00000198851	protein_coding	-0.645281	9.69811e-06	0.000159377	3.19412
SMARCAD1	ENSG00000163104	protein_coding	-0.452313	9.69235e-06	0.000159377	3.19467
ATP6V0E2-AS1	ENSG00000204934	lncRNA	-0.429831	9.75445e-06	0.00016004	3.18874
TAS2R31	ENSG00000256436	protein_coding	-0.452055	9.75369e-06	0.00016004	3.18881
AL109741.1	ENSG00000225938	lncRNA	-0.485017	9.90167e-06	0.000162322	3.17485
KIF21A	ENSG00000139116	protein_coding	-0.566698	9.91395e-06	0.000162391	3.1737
CASD1	ENSG00000127995	protein_coding	-0.469489	9.97513e-06	0.000163169	3.16799
SLAMF6	ENSG00000162739	protein_coding	-0.498753	9.97779e-06	0.000163169	3.16775
SLCO4C1	ENSG00000173930	protein_coding	0.416002	1.00007e-05	0.000163411	3.16561
MPZ	ENSG00000158887	polymorphic_pseudogene	0.497988	1.00363e-05	0.000163621	3.16232
NPR2	ENSG00000159899	protein_coding	-0.446387	1.00381e-05	0.000163621	3.16215
RAB19	ENSG00000146955	protein_coding	0.594703	1.00221e-05	0.000163621	3.16364
AC040970.1	ENSG00000253210	lncRNA	0.418417	1.00483e-05	0.000163653	3.16121
TRAJ32	ENSG00000211857	TR_J_gene	-0.566504	1.01244e-05	0.000164758	3.15422
ZNF341-AS1	ENSG00000230753	lncRNA	0.376854	1.01326e-05	0.000164758	3.15346
IMPDH1	ENSG00000106348	protein_coding	0.440062	1.01678e-05	0.000165196	3.15025
SIT1	ENSG00000137078	protein_coding	-0.556283	1.01854e-05	0.000165348	3.14864
AL009179.1	ENSG00000281706	lncRNA	-0.441125	1.0202e-05	0.000165482	3.14714
CBS	ENSG00000160200	protein_coding	0.633513	1.02606e-05	0.000166163	3.14183
TRAJ25	ENSG00000211864	TR_J_gene	-0.555722	1.02554e-05	0.000166163	3.1423
HTATIP2	ENSG00000109854	protein_coding	0.403168	1.03194e-05	0.000166981	3.13652
KCNQ5	ENSG00000185760	protein_coding	-0.467302	1.03314e-05	0.000167039	3.13545
AL357033.1	ENSG00000167046	lncRNA	0.502563	1.04013e-05	0.000167918	3.12919
UBTD1	ENSG00000165886	protein_coding	0.446662	1.04025e-05	0.000167918	3.12909
SLC38A1	ENSG00000111371	protein_coding	-0.446453	1.0428e-05	0.000168193	3.12682
AC046158.1	ENSG00000260733	lncRNA	-0.423209	1.04504e-05	0.000168419	3.12483
OR56A7P	ENSG00000255481	unprocessed_pseudogene	0.487594	1.04622e-05	0.000168474	3.12378
LDHB	ENSG00000111716	polymorphic_pseudogene	-0.570497	1.04836e-05	0.000168683	3.12188
AC006033.2	ENSG00000272908	lncRNA	-0.419804	1.05113e-05	0.000168867	3.11944
THOC1	ENSG00000079134	protein_coding	-0.419983	1.0512e-05	0.000168867	3.11938
LINC01871	ENSG00000235576	lncRNA	-0.589187	1.05621e-05	0.000169537	3.11497
AGMAT	ENSG00000116771	protein_coding	-0.495505	1.07068e-05	0.000171584	3.10235
LINC02325	ENSG00000246084	lncRNA	-0.530126	1.07037e-05	0.000171584	3.10262
ZNF572	ENSG00000180938	protein_coding	-0.445356	1.07155e-05	0.000171585	3.1016
GPRIN3	ENSG00000185477	protein_coding	-0.503275	1.07493e-05	0.000171988	3.09868
AC093890.1	ENSG00000249741	processed_pseudogene	-0.428421	1.08029e-05	0.000172709	3.09406
AC011379.1	ENSG00000250069	lncRNA	0.615769	1.08161e-05	0.000172781	3.09294
RNF144B	ENSG00000137393	protein_coding	0.487358	1.08465e-05	0.000173128	3.09034
LINC02100	ENSG00000248693	lncRNA	-0.452004	1.08678e-05	0.00017333	3.08851
PLPP3	ENSG00000162407	protein_coding	0.455915	1.08964e-05	0.000173647	3.08608
ANKS1A	ENSG00000064999	protein_coding	0.420122	1.09197e-05	0.000173868	3.0841
ZHX3	ENSG00000174306	protein_coding	-0.385484	1.09276e-05	0.000173868	3.08343
TRBJ1-5	ENSG00000282173	TR_J_gene	-0.510845	1.096e-05	0.000174245	3.08068
AC026748.1	ENSG00000279908	TEC	-0.405003	1.10289e-05	0.000174839	3.07487
AC116158.1	ENSG00000259326	lncRNA	-0.50457	1.10498e-05	0.000174839	3.07311
FOS	ENSG00000170345	protein_coding	0.67082	1.10457e-05	0.000174839	3.07346
LLGL2	ENSG00000073350	protein_coding	-0.463694	1.10113e-05	0.000174839	3.07635
MTCYBP23	ENSG00000259671	processed_pseudogene	0.655799	1.10187e-05	0.000174839	3.07573
SIRPD	ENSG00000125900	protein_coding	0.426373	1.10328e-05	0.000174839	3.07455
RPAP2P1	ENSG00000270874	processed_pseudogene	-0.436625	1.11095e-05	0.000175644	3.06812
AC025884.1	ENSG00000258732	unprocessed_pseudogene	-0.600723	1.11651e-05	0.000176383	3.06349
ZNF614	ENSG00000142556	protein_coding	-0.407605	1.12018e-05	0.000176824	3.06045
IGFBP4	ENSG00000141753	protein_coding	-0.507089	1.12129e-05	0.000176859	3.05953
ABCE1	ENSG00000164163	protein_coding	-0.465762	1.13594e-05	0.00017903	3.0475
LINC01801	ENSG00000267767	lncRNA	-0.522222	1.14559e-05	0.000180408	3.03966
CHCHD6	ENSG00000159685	protein_coding	-0.408453	1.14933e-05	0.000180676	3.03664
HNRNPA1L2	ENSG00000139675	protein_coding	-0.433736	1.15091e-05	0.000180676	3.03537
MTARC1	ENSG00000186205	protein_coding	0.602092	1.15015e-05	0.000180676	3.03597
NAMPT	ENSG00000105835	protein_coding	0.65622	1.14829e-05	0.000180676	3.03748
PLIN4	ENSG00000167676	protein_coding	0.695396	1.16282e-05	0.000182404	3.02582
GNG10	ENSG00000242616	protein_coding	0.502825	1.16698e-05	0.000182816	3.02251
PPP1R16B	ENSG00000101445	protein_coding	-0.45551	1.16728e-05	0.000182816	3.02227
SERPINA1	ENSG00000197249	protein_coding	0.568955	1.17082e-05	0.000183227	3.01947
NSMF	ENSG00000165802	protein_coding	-0.42397	1.18042e-05	0.000184584	3.0119
TRBV19	ENSG00000211746	TR_V_gene	-0.636682	1.18531e-05	0.000185205	3.00806
SLC25A44	ENSG00000160785	protein_coding	0.450829	1.18977e-05	0.000185756	3.00458
FTLP3	ENSG00000226608	processed_pseudogene	0.448362	1.19236e-05	0.000186016	3.00257
AC079781.3	ENSG00000232097	processed_pseudogene	-0.425264	1.1951e-05	0.000186263	3.00044
HSD17B8	ENSG00000204228	protein_coding	-0.410869	1.19667e-05	0.000186263	2.99922
TRBV5-4	ENSG00000230099	TR_V_gene	-0.515893	1.19674e-05	0.000186263	2.99917
ZNF33B	ENSG00000196693	protein_coding	-0.410033	1.19941e-05	0.000186533	2.99711
AC068700.1	ENSG00000260398	lncRNA	-0.403004	1.2041e-05	0.000186827	2.99349
BCL2	ENSG00000171791	protein_coding	-0.528836	1.2033e-05	0.000186827	2.99411
SIGIRR	ENSG00000185187	protein_coding	-0.377917	1.20307e-05	0.000186827	2.99428
PPP4R1	ENSG00000154845	protein_coding	0.419481	1.20615e-05	0.000187	2.99191
TRAV21	ENSG00000211801	TR_V_gene	-0.632228	1.21284e-05	0.000187891	2.98679
MTHFD1P1	ENSG00000231831	processed_pseudogene	-0.595991	1.21465e-05	0.000188026	2.9854
N4BP2	ENSG00000078177	protein_coding	-0.471244	1.22201e-05	0.00018902	2.9798
HSPA1A	ENSG00000204389	protein_coding	0.487882	1.23043e-05	0.000190174	2.97344
TRAJ28	ENSG00000211861	TR_J_gene	-0.560939	1.23287e-05	0.000190405	2.9716
AC016493.1	ENSG00000267039	lncRNA	-0.391745	1.24098e-05	0.000191486	2.96553
CNR2	ENSG00000188822	protein_coding	-0.650197	1.24179e-05	0.000191486	2.96492
LINC02696	ENSG00000254427	lncRNA	-0.424548	1.24343e-05	0.000191591	2.9637
FAHD2CP	ENSG00000231584	transcribed_unprocessed_pseudogene	-0.40436	1.24612e-05	0.000191859	2.9617
KCNA3	ENSG00000177272	protein_coding	-0.47884	1.25316e-05	0.000192793	2.95648
AC009305.1	ENSG00000234579	lncRNA	0.551097	1.25445e-05	0.000192844	2.95552
CSPG4P10	ENSG00000276710	transcribed_unprocessed_pseudogene	-0.439139	1.25721e-05	0.00019312	2.95349
AC009927.1	ENSG00000250031	processed_pseudogene	0.470572	1.25975e-05	0.000193362	2.95162
HSF2	ENSG00000025156	protein_coding	-0.434321	1.26322e-05	0.000193746	2.94907
PTPN13	ENSG00000163629	protein_coding	-0.582901	1.26766e-05	0.000194278	2.94582
AC019254.1	ENSG00000259182	lncRNA	0.608449	1.27743e-05	0.000195625	2.93871
AC074138.1	ENSG00000276071	lncRNA	-0.389992	1.28054e-05	0.000195951	2.93645
TRAJ45	ENSG00000211844	TR_J_gene	-0.576149	1.28272e-05	0.000196135	2.93488
LYZL6	ENSG00000275722	protein_coding	-0.463111	1.28609e-05	0.000196462	2.93245
SMYD5	ENSG00000135632	protein_coding	-0.437703	1.28682e-05	0.000196462	2.93192
ZNF502	ENSG00000196653	protein_coding	-0.497945	1.29115e-05	0.000196972	2.92881
ZNF675	ENSG00000197372	protein_coding	-0.445253	1.29289e-05	0.000197086	2.92756
STXBP2	ENSG00000076944	protein_coding	0.405209	1.3073e-05	0.000199132	2.91729
AC078889.1	ENSG00000256072	lncRNA	0.579412	1.30965e-05	0.000199186	2.91563
MBNL1-AS1	ENSG00000229619	lncRNA	-0.393334	1.30932e-05	0.000199186	2.91586
E2F3P1	ENSG00000267046	processed_pseudogene	-0.564682	1.31565e-05	0.000199947	2.91139
GK	ENSG00000198814	protein_coding	0.583002	1.31883e-05	0.000200279	2.90915
APOA2	ENSG00000158874	protein_coding	0.501022	1.32002e-05	0.000200307	2.90832
IL1R1	ENSG00000115594	protein_coding	0.777203	1.32262e-05	0.000200549	2.90649
AC090948.2	ENSG00000272498	lncRNA	-0.494218	1.32468e-05	0.00020071	2.90505
CD5	ENSG00000110448	protein_coding	-0.589082	1.32633e-05	0.000200806	2.9039
TMEM25	ENSG00000149582	protein_coding	-0.446114	1.33224e-05	0.00020155	2.89978
PLXNA1	ENSG00000114554	protein_coding	-0.508546	1.33789e-05	0.000202251	2.89586
RAC2	ENSG00000128340	protein_coding	0.42687	1.34519e-05	0.000203095	2.89082
TRAJ43	ENSG00000211846	TR_J_gene	-0.538105	1.3455e-05	0.000203095	2.89061
ANK3	ENSG00000151150	protein_coding	-0.647339	1.34695e-05	0.000203161	2.88961
RPSA	ENSG00000168028	protein_coding	-0.421975	1.35304e-05	0.000203924	2.88543
LINC01825	ENSG00000223466	lncRNA	-0.532341	1.35545e-05	0.000204134	2.88378
ARL4AP2	ENSG00000248780	processed_pseudogene	0.503298	1.35751e-05	0.000204291	2.88237
MAOA	ENSG00000189221	protein_coding	1.18988	1.36188e-05	0.000204794	2.8794
IKZF2	ENSG00000030419	protein_coding	-0.63198	1.3636e-05	0.000204899	2.87823
COL6A2	ENSG00000142173	protein_coding	-0.644522	1.36506e-05	0.000204964	2.87724
FAM66B	ENSG00000215374	lncRNA	-0.459365	1.36859e-05	0.000205339	2.87485
ATP10A	ENSG00000206190	protein_coding	-0.523216	1.37154e-05	0.000205628	2.87285
COPS8P2	ENSG00000214552	processed_pseudogene	-0.562361	1.37653e-05	0.000206222	2.86949
AC090948.4	ENSG00000287377	lncRNA	-0.449998	1.37952e-05	0.000206361	2.86748
KREMEN1	ENSG00000183762	protein_coding	0.854108	1.37861e-05	0.000206361	2.86809
MAGOHB	ENSG00000111196	protein_coding	-0.414409	1.3815e-05	0.000206503	2.86615
GLB1L3	ENSG00000166105	protein_coding	-0.523249	1.39004e-05	0.000207623	2.86044
RGMA	ENSG00000182175	protein_coding	0.554456	1.39206e-05	0.00020777	2.85909
TRAJ9	ENSG00000211880	TR_J_gene	-0.561442	1.39421e-05	0.000207935	2.85767
AC004540.1	ENSG00000214870	lncRNA	0.535765	1.3996e-05	0.000207965	2.85409
CXCR1	ENSG00000163464	protein_coding	0.549256	1.39826e-05	0.000207965	2.85498
MEGF9	ENSG00000106780	protein_coding	0.49174	1.39921e-05	0.000207965	2.85435
SLC30A4	ENSG00000104154	protein_coding	-0.442987	1.39663e-05	0.000207965	2.85606
TRAJ44	ENSG00000211845	TR_J_gene	-0.567074	1.39807e-05	0.000207965	2.85511
ECE1	ENSG00000117298	protein_coding	0.524827	1.40721e-05	0.000208827	2.84907
RPS23	ENSG00000186468	protein_coding	-0.423226	1.40749e-05	0.000208827	2.84888
CASP17P	ENSG00000235505	transcribed_unprocessed_pseudogene	-0.514839	1.41394e-05	0.000209627	2.84465
MRPS17P5	ENSG00000274493	processed_pseudogene	-0.570099	1.41544e-05	0.000209696	2.84366
TBKBP1	ENSG00000198933	protein_coding	0.497672	1.41752e-05	0.000209848	2.84231
ATP8A2P2	ENSG00000229800	processed_pseudogene	0.438127	1.42372e-05	0.000210298	2.83827
RNF24	ENSG00000101236	protein_coding	0.590452	1.42296e-05	0.000210298	2.83876
RNU6-313P	ENSG00000252126	snRNA	0.532815	1.42324e-05	0.000210298	2.83858
RPL10P19	ENSG00000233609	transcribed_processed_pseudogene	-0.518255	1.4287e-05	0.000210879	2.83503
AC073326.1	ENSG00000228540	lncRNA	-0.430795	1.43562e-05	0.000211743	2.83056
AF165147.1	ENSG00000232855	lncRNA	-0.594823	1.44271e-05	0.000212633	2.82599
LITAF	ENSG00000189067	protein_coding	0.476285	1.45012e-05	0.000213567	2.82125
RFC3	ENSG00000133119	protein_coding	-0.427982	1.45485e-05	0.000214106	2.81824
GPR27	ENSG00000170837	protein_coding	0.570018	1.46248e-05	0.000214912	2.81339
RPL23AP30	ENSG00000226658	processed_pseudogene	0.484275	1.46169e-05	0.000214912	2.81389
AL442635.1	ENSG00000274008	misc_RNA	0.439421	1.46374e-05	0.00021494	2.81259
ARRB2	ENSG00000141480	protein_coding	0.413368	1.47322e-05	0.000216015	2.80661
TRGV1	ENSG00000211701	TR_V_gene	-0.463693	1.47228e-05	0.000216015	2.80721
RPL9P33	ENSG00000244071	processed_pseudogene	0.547246	1.47519e-05	0.000216145	2.80538
GTPBP3	ENSG00000130299	protein_coding	-0.375798	1.48551e-05	0.000217499	2.79892
CD1E	ENSG00000158488	protein_coding	-0.541212	1.48888e-05	0.000217832	2.79682
EEF2K	ENSG00000103319	protein_coding	-0.460227	1.49241e-05	0.000218189	2.79463
GSN	ENSG00000148180	protein_coding	0.425398	1.49804e-05	0.000218852	2.79114
TRAJ5	ENSG00000211884	TR_J_gene	-0.563023	1.4997e-05	0.000218934	2.79012
TUBA1A	ENSG00000167552	protein_coding	0.463475	1.50353e-05	0.000219333	2.78776
CCIN	ENSG00000185972	protein_coding	0.473896	1.5103e-05	0.000220161	2.7836
TRAJ48	ENSG00000211841	TR_J_gene	-0.537311	1.52753e-05	0.00022251	2.77309
AC015911.11	ENSG00000286065	lncRNA	-0.560927	1.53703e-05	0.000223243	2.76735
AF305872.2	ENSG00000287736	lncRNA	0.488222	1.5364e-05	0.000223243	2.76773
H3P47	ENSG00000179101	processed_pseudogene	0.440737	1.53608e-05	0.000223243	2.76793
LRRN1	ENSG00000175928	protein_coding	0.569146	1.5358e-05	0.000223243	2.7681
AC018552.2	ENSG00000260467	lncRNA	0.582497	1.54189e-05	0.000223352	2.76443
AC068580.4	ENSG00000250644	protein_coding	0.525672	1.54213e-05	0.000223352	2.76429
CASC3	ENSG00000108349	protein_coding	0.416985	1.54245e-05	0.000223352	2.7641
FAM66C	ENSG00000226711	lncRNA	-0.391706	1.54322e-05	0.000223352	2.76363
LIPT2	ENSG00000175536	protein_coding	-0.388346	1.54336e-05	0.000223352	2.76355
RPL35AP31	ENSG00000233460	processed_pseudogene	0.50091	1.55248e-05	0.000224356	2.75809
TPST1	ENSG00000169902	protein_coding	0.845614	1.55255e-05	0.000224356	2.75805
ACAD11	ENSG00000240303	protein_coding	-0.407207	1.55605e-05	0.000224438	2.75596
AL133383.4	ENSG00000279401	TEC	0.441712	1.5574e-05	0.000224438	2.75517
AP001434.1	ENSG00000226012	lncRNA	0.624567	1.5576e-05	0.000224438	2.75504
PLEKHF1	ENSG00000166289	protein_coding	-0.554312	1.5575e-05	0.000224438	2.7551
LINC02694	ENSG00000175779	lncRNA	-0.447362	1.56161e-05	0.000224854	2.75267
NIBAN1	ENSG00000135842	protein_coding	0.538043	1.5668e-05	0.000225439	2.74959
AC010168.1	ENSG00000214772	lncRNA	0.428687	1.57082e-05	0.000225764	2.74722
SHROOM4	ENSG00000158352	protein_coding	0.575424	1.57132e-05	0.000225764	2.74693
RNU6-1262P	ENSG00000252026	snRNA	-0.406729	1.57604e-05	0.000226279	2.74415
ZNF519	ENSG00000175322	protein_coding	-0.470874	1.5882e-05	0.000227862	2.73704
AL078604.3	ENSG00000276413	processed_pseudogene	0.467937	1.59361e-05	0.000228475	2.73389
AC061992.2	ENSG00000266970	lncRNA	0.56621	1.59999e-05	0.000229061	2.73018
RPL7L1P3	ENSG00000235090	processed_pseudogene	0.398536	1.59952e-05	0.000229061	2.73046
AC005050.3	ENSG00000286076	lncRNA	0.703841	1.60868e-05	0.00023014	2.72518
CARNMT1	ENSG00000156017	protein_coding	-0.398422	1.61199e-05	0.000230349	2.72327
FAM157C	ENSG00000260528	lncRNA	0.59151	1.61244e-05	0.000230349	2.72301
TRBV17	ENSG00000277880	TR_V_gene	-0.41548	1.61662e-05	0.000230781	2.72062
AC073111.4	ENSG00000284691	protein_coding	-0.445188	1.61846e-05	0.000230879	2.71956
AC215522.2	ENSG00000282572	lncRNA	0.553718	1.63252e-05	0.000232718	2.71156
TAS2R38	ENSG00000257138	protein_coding	0.503414	1.63562e-05	0.000232994	2.7098
PTTG4P	ENSG00000258571	processed_pseudogene	0.40179	1.65277e-05	0.000235269	2.70015
PLSCR1	ENSG00000188313	protein_coding	0.658127	1.65884e-05	0.000235799	2.69675
ZNF239	ENSG00000196793	protein_coding	-0.494861	1.65856e-05	0.000235799	2.69691
SCART1	ENSG00000214279	protein_coding	-0.609849	1.6667e-05	0.000236579	2.69238
TFAP4	ENSG00000090447	protein_coding	-0.38842	1.66632e-05	0.000236579	2.69259
AP000769.1	ENSG00000173727	transcribed_unprocessed_pseudogene	0.414786	1.67541e-05	0.000237479	2.68755
TRAV35	ENSG00000211814	TR_V_pseudogene	-0.424422	1.67491e-05	0.000237479	2.68783
HPD	ENSG00000158104	protein_coding	0.435446	1.67925e-05	0.000237855	2.68543
AL512625.3	ENSG00000287168	lncRNA	0.399059	1.68189e-05	0.000238059	2.68398
TPT1P10	ENSG00000180221	processed_pseudogene	0.391515	1.69604e-05	0.000239893	2.67622
ANKEF1	ENSG00000132623	protein_coding	-0.45229	1.70542e-05	0.000240919	2.67112
CCDC86	ENSG00000110104	protein_coding	-0.43391	1.70571e-05	0.000240919	2.67097
CPD	ENSG00000108582	protein_coding	0.485487	1.71694e-05	0.000242335	2.66489
AC133919.1	ENSG00000260507	lncRNA	0.486291	1.72647e-05	0.000243501	2.65977
TRAV12-2	ENSG00000211789	TR_V_gene	-0.594305	1.72764e-05	0.000243501	2.65914
AL137058.2	ENSG00000273784	lncRNA	-0.409812	1.74317e-05	0.000245369	2.65086
XCL2	ENSG00000143185	protein_coding	-0.58817	1.74334e-05	0.000245369	2.65077
FAT4	ENSG00000196159	protein_coding	-0.555026	1.7484e-05	0.00024586	2.64809
SNHG8	ENSG00000269893	lncRNA	-0.411945	1.7493e-05	0.00024586	2.64761
FES	ENSG00000182511	protein_coding	0.397181	1.75286e-05	0.000246088	2.64573
IATPR	ENSG00000233387	lncRNA	-0.522283	1.75461e-05	0.000246088	2.64481
TRAJ4	ENSG00000211885	TR_J_gene	-0.581488	1.7536e-05	0.000246088	2.64534
Z99572.1	ENSG00000213062	lncRNA	0.379653	1.7671e-05	0.000247666	2.63824
NBL1	ENSG00000158747	protein_coding	-0.507099	1.77462e-05	0.000248547	2.63431
SSH1	ENSG00000084112	protein_coding	0.46609	1.78063e-05	0.000249213	2.63119
FAAH2	ENSG00000165591	protein_coding	-0.614635	1.7845e-05	0.00024958	2.62918
ACTN1	ENSG00000072110	protein_coding	0.483965	1.78624e-05	0.000249649	2.62828
GCSAM	ENSG00000174500	protein_coding	-0.528466	1.78773e-05	0.000249682	2.62751
CBY3	ENSG00000204659	protein_coding	-0.357038	1.79285e-05	0.0002497	2.62486
MTCO2P11	ENSG00000235917	unprocessed_pseudogene	0.456752	1.79185e-05	0.0002497	2.62537
SAT1	ENSG00000130066	protein_coding	0.439926	1.78915e-05	0.0002497	2.62677
TRAJ16	ENSG00000211873	TR_J_gene	-0.577302	1.79082e-05	0.0002497	2.62591
LINC00398	ENSG00000237879	lncRNA	0.489155	1.79508e-05	0.000249837	2.62371
ADM	ENSG00000148926	protein_coding	0.701052	1.79889e-05	0.000250193	2.62175
RDM1	ENSG00000278023	protein_coding	-0.489069	1.80855e-05	0.000251362	2.61679
CFAP44	ENSG00000206530	protein_coding	-0.383661	1.81219e-05	0.000251693	2.61493
PPARG	ENSG00000132170	protein_coding	0.613706	1.82739e-05	0.000253629	2.6072
CCDC196	ENSG00000196553	protein_coding	-0.520092	1.838e-05	0.000254924	2.60184
MTND5P14	ENSG00000230225	unprocessed_pseudogene	0.446503	1.84031e-05	0.000254982	2.60069
SIGLEC9	ENSG00000129450	protein_coding	0.463932	1.84097e-05	0.000254982	2.60035
FERMT3	ENSG00000149781	protein_coding	0.367974	1.85275e-05	0.000256082	2.59445
NPM1	ENSG00000181163	protein_coding	-0.439522	1.8525e-05	0.000256082	2.59458
RPS3AP43	ENSG00000242661	processed_pseudogene	0.458906	1.85258e-05	0.000256082	2.59454
SNX25	ENSG00000109762	protein_coding	-0.473303	1.85829e-05	0.000256669	2.59169
FABP5P7	ENSG00000234964	processed_pseudogene	0.377274	1.87557e-05	0.000258878	2.58313
AC018755.5	ENSG00000286236	lncRNA	0.562878	1.88808e-05	0.000260424	2.57698
ZNF70	ENSG00000187792	protein_coding	-0.402945	1.89086e-05	0.000260628	2.57562
AC073332.1	ENSG00000237773	lncRNA	-0.373578	1.90106e-05	0.000261854	2.57064
RNF175	ENSG00000145428	protein_coding	0.587222	1.92064e-05	0.000264369	2.56116
TRAJ59	ENSG00000211832	TR_J_gene	-0.411618	1.92404e-05	0.000264655	2.55953
PCBP4	ENSG00000090097	protein_coding	-0.437564	1.93494e-05	0.000265972	2.5543
ALPK1	ENSG00000073331	protein_coding	0.472975	1.93706e-05	0.000266073	2.55329
GPR141BP	ENSG00000283444	unitary_pseudogene	0.513148	1.93834e-05	0.000266073	2.55268
CACNA1C	ENSG00000151067	protein_coding	-0.433839	1.94212e-05	0.000266408	2.55088
MAPK3	ENSG00000102882	protein_coding	0.409179	1.94416e-05	0.000266506	2.5499
NR2E1	ENSG00000112333	protein_coding	0.646554	1.94995e-05	0.000267117	2.54715
AL136456.1	ENSG00000227240	lncRNA	-0.557887	1.95484e-05	0.000267603	2.54484
AC099811.1	ENSG00000236194	lncRNA	0.391131	1.96126e-05	0.000268299	2.5418
RPL5	ENSG00000122406	protein_coding	-0.425911	1.9642e-05	0.000268516	2.54042
UBALD2	ENSG00000185262	protein_coding	0.403813	1.97669e-05	0.00027004	2.53455
LINC00920	ENSG00000246898	lncRNA	-0.567339	1.98553e-05	0.000271063	2.53043
TYW3	ENSG00000162623	protein_coding	-0.440614	1.9878e-05	0.000271187	2.52937
RAB32	ENSG00000118508	protein_coding	0.444278	1.98999e-05	0.000271301	2.52835
TRAJ19	ENSG00000211870	TR_J_gene	-0.59707	1.99143e-05	0.000271312	2.52768
CELF3	ENSG00000159409	protein_coding	0.395301	1.99789e-05	0.000272007	2.52469
TNFSF14	ENSG00000125735	protein_coding	0.418201	2.0045e-05	0.000272721	2.52164
CCDC141	ENSG00000163492	protein_coding	-0.636408	2.018e-05	0.000274371	2.51543
STOM	ENSG00000148175	protein_coding	0.54117	2.03398e-05	0.000276356	2.50813
ADA	ENSG00000196839	protein_coding	-0.469909	2.03881e-05	0.000276824	2.50594
CTHRC1P1	ENSG00000271005	processed_pseudogene	-0.540777	2.04702e-05	0.00027775	2.50222
MIR938	ENSG00000216035	miRNA	0.452841	2.0517e-05	0.000278197	2.50011
TRAV24	ENSG00000211805	TR_V_gene	-0.56128	2.05398e-05	0.000278318	2.49908
CROT	ENSG00000005469	protein_coding	-0.412389	2.06247e-05	0.000279174	2.49527
TRAJ31	ENSG00000211858	TR_J_gene	-0.588105	2.06309e-05	0.000279174	2.49499
DSC1	ENSG00000134765	protein_coding	-0.733045	2.07193e-05	0.000280025	2.49104
RTEL1P1	ENSG00000251441	transcribed_processed_pseudogene	0.523196	2.0726e-05	0.000280025	2.49074
SDCBP	ENSG00000137575	protein_coding	0.468463	2.07358e-05	0.000280025	2.4903
CDR2	ENSG00000140743	protein_coding	-0.415718	2.08078e-05	0.000280807	2.4871
FCGR1B	ENSG00000198019	protein_coding	0.712964	2.08942e-05	0.000281783	2.48327
SLC5A10	ENSG00000154025	protein_coding	-0.465419	2.09958e-05	0.000282962	2.47878
KRT8P38	ENSG00000226358	processed_pseudogene	0.523393	2.10381e-05	0.000283171	2.47692
ROPN1B	ENSG00000114547	protein_coding	-0.501388	2.10396e-05	0.000283171	2.47685
AC018413.1	ENSG00000265778	lncRNA	0.395105	2.10989e-05	0.000283697	2.47425
AC246785.2	ENSG00000233586	processed_pseudogene	-0.40643	2.11071e-05	0.000283697	2.47389
GPR79	ENSG00000232374	processed_pseudogene	0.413155	2.11829e-05	0.000284335	2.47058
STX11	ENSG00000135604	protein_coding	0.518831	2.11759e-05	0.000284335	2.47088
AC012123.1	ENSG00000228835	lncRNA	-0.458866	2.12414e-05	0.000284793	2.46803
TRAV4	ENSG00000211778	TR_V_gene	-0.541961	2.12456e-05	0.000284793	2.46785
RNU4-2	ENSG00000202538	snRNA	0.614502	2.13661e-05	0.000286216	2.46262
RASGEF1A	ENSG00000198915	protein_coding	0.39683	2.14972e-05	0.000287781	2.45696
TTC24	ENSG00000187862	protein_coding	-0.513157	2.16571e-05	0.000289728	2.45011
ZNF600	ENSG00000189190	protein_coding	-0.437348	2.16785e-05	0.00028982	2.4492
AC006238.2	ENSG00000285653	lncRNA	0.474703	2.17995e-05	0.000291048	2.44405
ZCCHC18	ENSG00000166707	protein_coding	-0.404568	2.17986e-05	0.000291048	2.44409
RPL21P109	ENSG00000237816	processed_pseudogene	0.452336	2.18871e-05	0.000292023	2.44034
AC104046.1	ENSG00000259630	transcribed_processed_pseudogene	-0.449904	2.19613e-05	0.000292623	2.43721
NUMB	ENSG00000133961	protein_coding	0.434473	2.19511e-05	0.000292623	2.43765
AP003086.3	ENSG00000288393	transcribed_processed_pseudogene	0.607507	2.20272e-05	0.00029311	2.43444
FSIP2	ENSG00000188738	protein_coding	-0.5874	2.20161e-05	0.00029311	2.43491
URAD	ENSG00000183463	protein_coding	0.429663	2.20548e-05	0.000293282	2.43329
C17orf113	ENSG00000267221	protein_coding	-0.388808	2.2725e-05	0.000301994	2.40562
NT5DC3	ENSG00000111696	protein_coding	0.419189	2.27825e-05	0.000302557	2.40328
GTPBP1	ENSG00000100226	protein_coding	0.413658	2.28654e-05	0.000303456	2.39992
RETN	ENSG00000104918	protein_coding	1.06576	2.2915e-05	0.000303913	2.39792
TMIGD3	ENSG00000121933	protein_coding	0.812832	2.29442e-05	0.000304098	2.39674
MSH2-OT1	ENSG00000235760	lncRNA	-0.362184	2.29858e-05	0.000304448	2.39507
FTH1	ENSG00000167996	protein_coding	0.549475	2.30194e-05	0.000304691	2.39372
AP003498.1	ENSG00000248671	lncRNA	-0.399226	2.3235e-05	0.000307341	2.3851
ENTPD1	ENSG00000138185	protein_coding	0.383794	2.32843e-05	0.000307789	2.38315
G6PD	ENSG00000160211	protein_coding	0.457144	2.33906e-05	0.000308787	2.37893
TPD52	ENSG00000076554	protein_coding	-0.499518	2.3386e-05	0.000308787	2.37912
AC009486.1	ENSG00000261117	lncRNA	-0.382665	2.34464e-05	0.00030932	2.37673
AC241952.2	ENSG00000275131	transcribed_unprocessed_pseudogene	-0.381682	2.35016e-05	0.000309639	2.37456
PCED1B-AS1	ENSG00000247774	lncRNA	-0.398642	2.34927e-05	0.000309639	2.37491
TAFA1	ENSG00000183662	protein_coding	-0.520556	2.35582e-05	0.00031018	2.37234
ADAMTS5	ENSG00000154736	protein_coding	-0.720012	2.3631e-05	0.000310503	2.36949
AL390195.3	ENSG00000260948	lncRNA	-0.430001	2.36603e-05	0.000310503	2.36834
FAHD2B	ENSG00000144199	protein_coding	-0.428196	2.36015e-05	0.000310503	2.37064
SLC25A36	ENSG00000114120	protein_coding	-0.393208	2.36541e-05	0.000310503	2.36858
ZNF781	ENSG00000196381	protein_coding	-0.572131	2.36346e-05	0.000310503	2.36934
SEMA4C	ENSG00000168758	protein_coding	-0.439797	2.36782e-05	0.000310533	2.36764
AATK	ENSG00000181409	protein_coding	0.621854	2.37006e-05	0.000310586	2.36677
ADAM9	ENSG00000168615	protein_coding	0.400274	2.37132e-05	0.000310586	2.36628
ESM1	ENSG00000164283	protein_coding	-0.503675	2.37767e-05	0.000311214	2.3638
CARD11-AS1	ENSG00000237286	lncRNA	-0.445758	2.38324e-05	0.000311738	2.36164
TRAV18	ENSG00000211798	TR_V_gene	-0.464668	2.39308e-05	0.000312821	2.35783
SARDH	ENSG00000123453	protein_coding	-0.540303	2.39662e-05	0.000313079	2.35647
DDIAS	ENSG00000165490	protein_coding	0.457439	2.39919e-05	0.00031321	2.35548
AL078624.1	ENSG00000271399	processed_pseudogene	0.467818	2.40646e-05	0.000313545	2.35268
PLCXD2	ENSG00000240891	protein_coding	-0.412556	2.40545e-05	0.000313545	2.35307
ZNF829	ENSG00000185869	protein_coding	-0.414284	2.40518e-05	0.000313545	2.35317
AC009041.1	ENSG00000260496	lncRNA	-0.486134	2.42681e-05	0.00031527	2.3449
AC073115.1	ENSG00000229628	lncRNA	-0.436018	2.42915e-05	0.00031527	2.34401
ATP9A	ENSG00000054793	protein_coding	0.636675	2.42773e-05	0.00031527	2.34455
FTL	ENSG00000087086	protein_coding	0.418584	2.42234e-05	0.00031527	2.3466
PTK2B	ENSG00000120899	protein_coding	0.348436	2.42398e-05	0.00031527	2.34598
ST6GALNAC6	ENSG00000160408	protein_coding	-0.483836	2.42655e-05	0.00031527	2.345
LIPK	ENSG00000204021	protein_coding	0.552899	2.43548e-05	0.000315886	2.3416
OR52B2	ENSG00000255307	protein_coding	0.447613	2.44025e-05	0.000316299	2.3398
NAPGP1	ENSG00000271408	processed_pseudogene	0.456068	2.4451e-05	0.000316723	2.33796
AC009229.1	ENSG00000227292	lncRNA	0.453588	2.4681e-05	0.000319289	2.32931
KHDC1	ENSG00000135314	protein_coding	-0.393082	2.46801e-05	0.000319289	2.32935
DHRS13	ENSG00000167536	protein_coding	0.531079	2.47238e-05	0.000319635	2.32771
CHPT1	ENSG00000111666	protein_coding	0.429446	2.47934e-05	0.000320121	2.32512
RTN2	ENSG00000125744	protein_coding	0.476471	2.47799e-05	0.000320121	2.32562
FAM135A	ENSG00000082269	protein_coding	-0.407081	2.48965e-05	0.000321175	2.32128
TRAV17	ENSG00000211797	TR_V_gene	-0.584574	2.49071e-05	0.000321175	2.32089
ACE2	ENSG00000130234	protein_coding	0.45716	2.49479e-05	0.000321494	2.31937
FAM172BP	ENSG00000175841	processed_pseudogene	-0.386228	2.4983e-05	0.000321739	2.31807
ME3	ENSG00000151376	protein_coding	-0.445843	2.50029e-05	0.000321788	2.31734
AC092580.1	ENSG00000229405	processed_pseudogene	-0.485211	2.51997e-05	0.000324112	2.3101
AL033519.5	ENSG00000287458	lncRNA	0.723771	2.52571e-05	0.000324433	2.30799
AL159972.1	ENSG00000279463	lncRNA	-0.525446	2.52487e-05	0.000324433	2.3083
TUFT1	ENSG00000143367	protein_coding	0.51898	2.532e-05	0.000325032	2.3057
AL121985.3	ENSG00000275801	unprocessed_pseudogene	-0.426643	2.53422e-05	0.000325108	2.30489
RPL23AP66	ENSG00000243141	processed_pseudogene	0.496918	2.53586e-05	0.00032511	2.30429
TLR2	ENSG00000137462	protein_coding	0.53325	2.54259e-05	0.000325764	2.30184
AC022075.1	ENSG00000245648	lncRNA	-0.60065	2.55391e-05	0.000327005	2.29774
F12	ENSG00000131187	protein_coding	0.497211	2.57057e-05	0.000328717	2.29173
VSIR	ENSG00000107738	protein_coding	0.4394	2.56983e-05	0.000328717	2.292
EXD3	ENSG00000187609	protein_coding	-0.356135	2.57326e-05	0.000328851	2.29076
CCDC50	ENSG00000152492	protein_coding	-0.416504	2.5752e-05	0.000328889	2.29007
AP002505.2	ENSG00000279275	TEC	-0.434087	2.58819e-05	0.000330337	2.28542
AC011092.2	ENSG00000255476	lncRNA	0.419881	2.5948e-05	0.000330808	2.28306
AL133384.2	ENSG00000279796	TEC	-0.433214	2.59583e-05	0.000330808	2.2827
NMUR1	ENSG00000171596	protein_coding	-0.639718	2.59839e-05	0.000330808	2.28179
TRAJ23	ENSG00000211866	TR_J_gene	-0.564647	2.5985e-05	0.000330808	2.28175
MMP23B	ENSG00000189409	protein_coding	-0.483024	2.60052e-05	0.000330856	2.28103
DLG3	ENSG00000082458	protein_coding	-0.493036	2.60626e-05	0.000331374	2.27899
IL7	ENSG00000104432	protein_coding	-0.41794	2.61344e-05	0.000332076	2.27645
CD3D	ENSG00000167286	protein_coding	-0.577547	2.62286e-05	0.000333043	2.27313
MMP25	ENSG00000008516	protein_coding	0.63654	2.62438e-05	0.000333043	2.27259
DMAC1	ENSG00000137038	protein_coding	-0.393937	2.64487e-05	0.000335431	2.26541
AL034550.2	ENSG00000277301	lncRNA	-0.530867	2.67205e-05	0.000338663	2.25596
ACOX1	ENSG00000161533	protein_coding	0.398575	2.67924e-05	0.000339359	2.25349
TRAJ20	ENSG00000211869	TR_J_gene	-0.567892	2.68527e-05	0.000339907	2.25141
RNU6-141P	ENSG00000222431	snRNA	0.385684	2.69478e-05	0.000340896	2.24814
PLD4	ENSG00000166428	protein_coding	-0.671632	2.69663e-05	0.000340914	2.24751
AC008114.1	ENSG00000255649	lncRNA	0.485917	2.70634e-05	0.000341926	2.24419
LINC01215	ENSG00000271856	lncRNA	-0.472376	2.71191e-05	0.000342413	2.24229
DSCR10	ENSG00000233316	lncRNA	0.458366	2.7249e-05	0.000343403	2.23788
KLF5	ENSG00000102554	protein_coding	0.479227	2.72365e-05	0.000343403	2.2383
TRPC1	ENSG00000144935	protein_coding	-0.513721	2.72435e-05	0.000343403	2.23806
LINC02363	ENSG00000180712	lncRNA	0.529419	2.72918e-05	0.000343725	2.23643
TP53I11	ENSG00000175274	protein_coding	0.611463	2.73363e-05	0.000344069	2.23492
CRYZ	ENSG00000116791	protein_coding	-0.483587	2.74027e-05	0.000344255	2.23268
MSL1	ENSG00000188895	protein_coding	0.41241	2.7396e-05	0.000344255	2.23291
TSEN15	ENSG00000198860	protein_coding	-0.398858	2.73835e-05	0.000344255	2.23333
AC090825.1	ENSG00000259363	lncRNA	-0.478153	2.75111e-05	0.0003454	2.22904
RPGRIP1L	ENSG00000103494	protein_coding	-0.433257	2.77474e-05	0.000348149	2.22114
THBS4	ENSG00000113296	protein_coding	-0.383398	2.7914e-05	0.0003498	2.21561
TMEM14A	ENSG00000096092	protein_coding	-0.435577	2.79024e-05	0.0003498	2.21599
ALG10B	ENSG00000175548	protein_coding	-0.432143	2.80111e-05	0.000350796	2.21241
AL513327.1	ENSG00000225313	lncRNA	0.631754	2.80677e-05	0.000351066	2.21054
KLF7-IT1	ENSG00000237892	lncRNA	0.397257	2.80564e-05	0.000351066	2.21091
AC087672.2	ENSG00000254288	lncRNA	0.587784	2.81757e-05	0.000352196	2.20699
AL109615.4	ENSG00000287562	lncRNA	-0.371047	2.82077e-05	0.000352376	2.20595
AC008533.1	ENSG00000285366	TEC	0.462909	2.8333e-05	0.000353429	2.20185
OTUD7A	ENSG00000169918	protein_coding	-0.466197	2.83627e-05	0.000353429	2.20089
P4HA2	ENSG00000072682	protein_coding	0.43614	2.83596e-05	0.000353429	2.20099
TMCO3	ENSG00000150403	protein_coding	0.384614	2.8343e-05	0.000353429	2.20153
AL021707.6	ENSG00000272669	lncRNA	0.514115	2.85389e-05	0.000355149	2.19517
AP001042.1	ENSG00000205622	lncRNA	0.424739	2.85895e-05	0.000355149	2.19353
AP001318.3	ENSG00000278215	processed_pseudogene	0.437541	2.85621e-05	0.000355149	2.19442
ARID3A	ENSG00000116017	protein_coding	0.375278	2.8572e-05	0.000355149	2.1941
UBQLN4P1	ENSG00000241627	processed_pseudogene	0.666699	2.85603e-05	0.000355149	2.19448
KCNH1	ENSG00000143473	protein_coding	-0.394635	2.88994e-05	0.000358776	2.18358
AC139491.7	ENSG00000285476	protein_coding	-0.523492	2.90134e-05	0.000359843	2.17994
EOMES	ENSG00000163508	protein_coding	-0.618249	2.90393e-05	0.000359843	2.17912
ZSCAN23	ENSG00000187987	protein_coding	-0.571473	2.90357e-05	0.000359843	2.17923
IL27	ENSG00000197272	protein_coding	0.476129	2.93058e-05	0.000362921	2.17068
AL359715.4	ENSG00000279022	TEC	-0.399209	2.9663e-05	0.000367116	2.1595
LINC01350	ENSG00000228309	lncRNA	0.453367	2.97147e-05	0.000367528	2.15789
KLHL31	ENSG00000124743	protein_coding	-0.429559	2.97933e-05	0.000368273	2.15545
PHOSPHO2	ENSG00000144362	protein_coding	-0.385048	2.98541e-05	0.000368796	2.15357
GOLGA6L9	ENSG00000197978	protein_coding	-0.439096	2.9917e-05	0.000369346	2.15163
AC055811.4	ENSG00000278864	TEC	-0.465288	3.00313e-05	0.000369992	2.14811
TCF3P1	ENSG00000236567	processed_pseudogene	0.49902	3.00434e-05	0.000369992	2.14774
ZNF10	ENSG00000256223	protein_coding	-0.428992	3.00406e-05	0.000369992	2.14782
ZNF876P	ENSG00000198155	transcribed_unprocessed_pseudogene	-0.37652	3.00165e-05	0.000369992	2.14856
AC091769.1	ENSG00000276531	unprocessed_pseudogene	0.350738	3.01115e-05	0.000370603	2.14565
UGCG	ENSG00000148154	protein_coding	0.569498	3.01553e-05	0.000370914	2.14431
AC139769.1	ENSG00000233836	transcribed_unprocessed_pseudogene	-0.470006	3.0354e-05	0.000373128	2.13824
IRAK1BP1	ENSG00000146243	protein_coding	-0.356686	3.04076e-05	0.000373558	2.13661
CD27	ENSG00000139193	protein_coding	-0.504875	3.04641e-05	0.000373563	2.1349
FMNL3	ENSG00000161791	protein_coding	-0.454289	3.04531e-05	0.000373563	2.13523
TNFAIP6	ENSG00000123610	protein_coding	0.761729	3.04337e-05	0.000373563	2.13582
SNORD89	ENSG00000212283	snoRNA	0.366391	3.04905e-05	0.000373658	2.1341
RNU6-1003P	ENSG00000252908	snRNA	0.494802	3.06041e-05	0.000374821	2.13067
TIMP2	ENSG00000035862	protein_coding	0.583777	3.07311e-05	0.000376145	2.12685
AC003989.2	ENSG00000243621	processed_pseudogene	-0.411238	3.09016e-05	0.000377309	2.12174
AL032821.1	ENSG00000234484	lncRNA	0.453	3.08958e-05	0.000377309	2.12191
APOBR	ENSG00000184730	protein_coding	0.563268	3.0855e-05	0.000377309	2.12313
KLRC4	ENSG00000183542	protein_coding	-0.623375	3.08945e-05	0.000377309	2.12195
AC132872.1	ENSG00000260563	lncRNA	0.427018	3.09788e-05	0.00037779	2.11944
GUSBP2	ENSG00000241549	transcribed_unprocessed_pseudogene	-0.453784	3.09652e-05	0.00037779	2.11984
KLF7	ENSG00000118263	protein_coding	0.420969	3.10658e-05	0.00037862	2.11685
AC079907.2	ENSG00000258308	lncRNA	0.394712	3.11709e-05	0.000379351	2.11373
H1-7	ENSG00000187166	protein_coding	-0.410829	3.1163e-05	0.000379351	2.11397
PHC1P1	ENSG00000179899	processed_pseudogene	-0.441665	3.11826e-05	0.000379351	2.11338
RAB33B	ENSG00000172007	protein_coding	0.443871	3.12428e-05	0.000379852	2.1116
AC233976.1	ENSG00000229151	lncRNA	-0.544917	3.1299e-05	0.000380073	2.10995
AGGF1P2	ENSG00000233435	processed_pseudogene	-0.592918	3.12929e-05	0.000380073	2.11012
GOLGA8A	ENSG00000175265	protein_coding	-0.520706	3.13316e-05	0.000380238	2.10899
RNU1-28P	ENSG00000206588	snRNA	0.47527	3.14524e-05	0.000381473	2.10543
RNU4-1	ENSG00000200795	snRNA	0.604488	3.1531e-05	0.000381963	2.10313
ZNF569	ENSG00000196437	protein_coding	-0.378839	3.15246e-05	0.000381963	2.10332
AL353662.2	ENSG00000233668	processed_pseudogene	0.414559	3.156e-05	0.000382037	2.10228
PRDM11	ENSG00000019485	protein_coding	-0.396186	3.15754e-05	0.000382037	2.10183
AC027271.1	ENSG00000272576	lncRNA	-0.357854	3.1654e-05	0.000382669	2.09954
ZNF112	ENSG00000062370	protein_coding	-0.488031	3.16659e-05	0.000382669	2.09919
ADAR	ENSG00000160710	protein_coding	0.425888	3.16863e-05	0.000382685	2.0986
CABP4	ENSG00000175544	protein_coding	-0.44729	3.19554e-05	0.000385469	2.09079
CXXC5	ENSG00000171604	protein_coding	-0.393761	3.1937e-05	0.000385469	2.09132
JAKMIP2	ENSG00000176049	protein_coding	-0.577411	3.201e-05	0.000385895	2.08922
AC009812.1	ENSG00000251867	lncRNA	-0.37414	3.20354e-05	0.000385968	2.08848
AC092111.2	ENSG00000276417	lncRNA	-0.414429	3.22313e-05	0.000388096	2.08286
DPP4-DT	ENSG00000230918	lncRNA	-0.421062	3.22733e-05	0.000388363	2.08165
TRG-AS1	ENSG00000281103	lncRNA	-0.464295	3.22924e-05	0.000388363	2.08111
FAM53C	ENSG00000120709	protein_coding	0.444094	3.27091e-05	0.000393138	2.06928
AL357793.2	ENSG00000237011	lncRNA	-0.439545	3.27874e-05	0.000393706	2.06707
MIR6131	ENSG00000277073	miRNA	0.445369	3.28049e-05	0.000393706	2.06658
PHLDB3	ENSG00000176531	protein_coding	-0.368933	3.28154e-05	0.000393706	2.06628
IKZF3	ENSG00000161405	protein_coding	-0.500243	3.29782e-05	0.000395422	2.06172
AC073288.2	ENSG00000242578	lncRNA	0.39999	3.30675e-05	0.000396255	2.05922
HPN-AS1	ENSG00000227392	lncRNA	0.600904	3.31737e-05	0.00039729	2.05627
AC003957.1	ENSG00000279825	TEC	-0.526279	3.3404e-05	0.000399809	2.04988
RN7SL382P	ENSG00000240723	misc_RNA	0.425315	3.34653e-05	0.000400303	2.04819
SPATA41	ENSG00000189419	lncRNA	0.409366	3.34993e-05	0.00040047	2.04725
AC009229.2	ENSG00000229160	lncRNA	0.52392	3.36286e-05	0.000401776	2.0437
AC079142.1	ENSG00000285679	lncRNA	-0.371966	3.36935e-05	0.000402311	2.04192
SLC4A4	ENSG00000080493	protein_coding	-0.545936	3.39005e-05	0.000404541	2.03627
AC116021.1	ENSG00000254639	lncRNA	0.426083	3.40363e-05	0.000405677	2.03258
GNS	ENSG00000135677	protein_coding	0.362329	3.40356e-05	0.000405677	2.0326
TRBV4-1	ENSG00000211710	TR_V_gene	-0.645256	3.409e-05	0.000406075	2.03113
FUT2	ENSG00000176920	protein_coding	-0.434543	3.41516e-05	0.000406567	2.02946
SLC29A2	ENSG00000174669	protein_coding	-0.49902	3.44175e-05	0.000409489	2.02231
AC245052.2	ENSG00000224579	unprocessed_pseudogene	0.456378	3.45008e-05	0.00040954	2.02008
CLEC4E	ENSG00000166523	protein_coding	0.638292	3.45038e-05	0.00040954	2.02
RN7SKP134	ENSG00000200830	misc_RNA	0.435601	3.44906e-05	0.00040954	2.02035
SARM1	ENSG00000004139	protein_coding	-0.410216	3.44556e-05	0.00040954	2.02129
NCF2	ENSG00000116701	protein_coding	0.389977	3.50128e-05	0.000415336	2.00649
LTK	ENSG00000062524	protein_coding	-0.570285	3.50936e-05	0.000416047	2.00436
PTPN4	ENSG00000088179	protein_coding	-0.442404	3.51311e-05	0.000416246	2.00338
AKAP5	ENSG00000179841	protein_coding	-0.432284	3.52015e-05	0.000416832	2.00153
POLR2M	ENSG00000255529	protein_coding	-0.375404	3.52595e-05	0.000417272	2.00001
EPAS1	ENSG00000116016	protein_coding	0.593737	3.53312e-05	0.000417626	1.99814
TUB	ENSG00000166402	protein_coding	-0.548934	3.53221e-05	0.000417626	1.99838
TRBJ1-2	ENSG00000282420	TR_J_gene	-0.489476	3.56023e-05	0.000420583	1.99109
WNT7A	ENSG00000154764	protein_coding	-0.614212	3.573e-05	0.000421842	1.98778
KLHL8	ENSG00000145332	protein_coding	0.419513	3.59165e-05	0.000423681	1.98298
KRT18P34	ENSG00000244515	processed_pseudogene	0.385018	3.59281e-05	0.000423681	1.98268
CAMKK1	ENSG00000004660	protein_coding	0.531124	3.60089e-05	0.000424383	1.98061
AL133284.1	ENSG00000230894	lncRNA	-0.448857	3.60559e-05	0.000424437	1.97941
KIAA1324L	ENSG00000164659	protein_coding	-0.581905	3.60487e-05	0.000424437	1.97959
TLK2P2	ENSG00000228828	processed_pseudogene	-0.453531	3.61021e-05	0.00042473	1.97823
TOMM20P2	ENSG00000255987	processed_pseudogene	-0.541075	3.61274e-05	0.000424778	1.97758
HLA-DQA1	ENSG00000196735	protein_coding	-0.601377	3.61819e-05	0.000424934	1.97619
SPATA1	ENSG00000122432	protein_coding	0.376185	3.61831e-05	0.000424934	1.97616
AL136419.3	ENSG00000286931	lncRNA	-0.396983	3.6221e-05	0.000425129	1.9752
FSBP	ENSG00000265817	protein_coding	-0.572859	3.62644e-05	0.000425215	1.97409
TNIP1	ENSG00000145901	protein_coding	0.392671	3.62709e-05	0.000425215	1.97393
KCNN4	ENSG00000104783	protein_coding	-0.413246	3.63346e-05	0.000425713	1.97231
KCNQ5-IT1	ENSG00000233844	lncRNA	-0.468329	3.63989e-05	0.000426216	1.97068
MXRA8	ENSG00000162576	protein_coding	-0.43857	3.65331e-05	0.000427287	1.96728
PEX3	ENSG00000034693	protein_coding	-0.407253	3.65193e-05	0.000427287	1.96763
DACH1	ENSG00000276644	protein_coding	0.55455	3.66011e-05	0.000427833	1.96557
OR10V3P	ENSG00000254743	unprocessed_pseudogene	0.368239	3.66717e-05	0.000428408	1.96379
KCNS2	ENSG00000156486	protein_coding	0.427914	3.69213e-05	0.000430973	1.95754
ZNF420	ENSG00000197050	protein_coding	-0.454273	3.69344e-05	0.000430973	1.95721
SIRPG	ENSG00000089012	protein_coding	-0.542925	3.7145e-05	0.000433178	1.95197
AL157935.3	ENSG00000257524	protein_coding	-0.40045	3.72169e-05	0.000433511	1.95018
EDAR	ENSG00000135960	protein_coding	-0.573066	3.71973e-05	0.000433511	1.95067
C8orf88	ENSG00000253250	protein_coding	0.55357	3.72436e-05	0.000433569	1.94952
AL157935.2	ENSG00000227218	lncRNA	-0.532399	3.72928e-05	0.000433889	1.9483
SPI1	ENSG00000066336	protein_coding	0.548916	3.75089e-05	0.00043615	1.94298
PFAS	ENSG00000178921	protein_coding	-0.361449	3.75598e-05	0.000436489	1.94172
AL163193.1	ENSG00000237088	processed_pseudogene	-0.494888	3.7598e-05	0.000436678	1.94079
AC069431.2	ENSG00000270554	processed_pseudogene	0.434751	3.78518e-05	0.000439371	1.93458
AL117335.1	ENSG00000276649	lncRNA	0.407453	3.79307e-05	0.000440031	1.93266
BTG1P1	ENSG00000256720	processed_pseudogene	-0.653737	3.83338e-05	0.00044445	1.92292
STRBP	ENSG00000165209	protein_coding	-0.469253	3.84987e-05	0.000446103	1.91896
RNU4-38P	ENSG00000201342	snRNA	0.423094	3.87175e-05	0.000448379	1.91373
PCED1B	ENSG00000179715	protein_coding	-0.510264	3.87778e-05	0.000448818	1.9123
CD177P1	ENSG00000204933	unprocessed_pseudogene	0.76747	3.88325e-05	0.00044919	1.911
PFN1P2	ENSG00000270392	transcribed_processed_pseudogene	-0.412244	3.8858e-05	0.000449225	1.9104
AL022315.2	ENSG00000273866	misc_RNA	-0.377002	3.89706e-05	0.000449531	1.90773
GPR19	ENSG00000183150	protein_coding	-0.383203	3.8907e-05	0.000449531	1.90923
OR52B4	ENSG00000221996	protein_coding	0.463829	3.89617e-05	0.000449531	1.90794
ZNF516	ENSG00000101493	protein_coding	0.421976	3.89744e-05	0.000449531	1.90764
TRBV10-1	ENSG00000211717	TR_V_gene	-0.43224	3.94783e-05	0.000455082	1.89579
MCTP1-AS1	ENSG00000249545	lncRNA	0.429528	3.95292e-05	0.000455406	1.89461
ZNF532	ENSG00000074657	protein_coding	-0.391659	3.96425e-05	0.000456448	1.89197
AL627309.5	ENSG00000241860	lncRNA	0.556983	3.97143e-05	0.000456563	1.8903
C11orf1	ENSG00000137720	protein_coding	-0.373991	3.97025e-05	0.000456563	1.89057
RPLP0	ENSG00000089157	protein_coding	-0.361218	3.9721e-05	0.000456563	1.89015
AC006483.2	ENSG00000272719	lncRNA	0.386361	4.00207e-05	0.000459743	1.88322
ITPRIPL1	ENSG00000198885	protein_coding	-0.452571	4.01756e-05	0.000461259	1.87965
ARL10	ENSG00000175414	protein_coding	-0.434794	4.02444e-05	0.000461784	1.87808
AC004024.1	ENSG00000257624	processed_pseudogene	-0.360006	4.07725e-05	0.000467574	1.86606
CCNA1	ENSG00000133101	protein_coding	0.772003	4.08206e-05	0.000467704	1.86497
TRIM47	ENSG00000132481	protein_coding	-0.400152	4.08305e-05	0.000467704	1.86475
PHF14	ENSG00000106443	protein_coding	-0.40818	4.10355e-05	0.000469782	1.86013
LINC01712	ENSG00000231364	lncRNA	-0.481271	4.11934e-05	0.000471165	1.85659
TRBV6-1	ENSG00000211706	TR_V_gene	-0.532258	4.12034e-05	0.000471165	1.85637
KPNA5	ENSG00000196911	protein_coding	-0.47366	4.15119e-05	0.000474422	1.84949
TRAJ33	ENSG00000211856	TR_J_gene	-0.553445	4.15634e-05	0.000474739	1.84835
TAS2R50	ENSG00000212126	protein_coding	-0.450081	4.17015e-05	0.000476045	1.84529
AC087627.1	ENSG00000253983	lncRNA	0.455555	4.17794e-05	0.000476662	1.84358
ZDHHC18	ENSG00000204160	protein_coding	0.47779	4.18777e-05	0.000477511	1.84141
CEACAM3	ENSG00000170956	protein_coding	0.470683	4.20556e-05	0.000479266	1.8375
RAB20	ENSG00000139832	protein_coding	0.607033	4.21048e-05	0.000479554	1.83643
FOSL2	ENSG00000075426	protein_coding	0.509735	4.21576e-05	0.000479882	1.83527
RPS3AP32	ENSG00000240047	processed_pseudogene	0.562624	4.22336e-05	0.000480473	1.83361
SLC22A15	ENSG00000163393	protein_coding	0.430135	4.22989e-05	0.000480943	1.83219
SRXN1	ENSG00000271303	protein_coding	0.454453	4.26086e-05	0.000484189	1.82546
AC015911.7	ENSG00000267369	processed_pseudogene	-0.551019	4.26707e-05	0.000484619	1.82412
RPL13AP25	ENSG00000136149	processed_pseudogene	-0.387328	4.27298e-05	0.000485015	1.82285
RPSAP22	ENSG00000229648	processed_pseudogene	0.404669	4.29697e-05	0.000487462	1.81769
NABP1	ENSG00000173559	protein_coding	0.44498	4.30951e-05	0.000488607	1.815
LINC02245	ENSG00000237638	lncRNA	-0.402073	4.31265e-05	0.000488685	1.81433
TRAV5	ENSG00000211779	TR_V_gene	-0.564486	4.32395e-05	0.000489688	1.81192
KAZN	ENSG00000189337	protein_coding	0.729425	4.34534e-05	0.000491555	1.80737
PLCB1	ENSG00000182621	protein_coding	-0.387979	4.34321e-05	0.000491555	1.80782
AC069257.1	ENSG00000222335	misc_RNA	0.53265	4.35372e-05	0.000492224	1.8056
TRAV30	ENSG00000259092	TR_V_gene	-0.452647	4.37493e-05	0.000494342	1.80112
TRAJ52	ENSG00000211838	TR_J_gene	-0.474638	4.38031e-05	0.00049467	1.79999
OR2L5	ENSG00000197454	protein_coding	-0.453882	4.3957e-05	0.000495848	1.79676
ZNF280B	ENSG00000275004	protein_coding	-0.378738	4.39507e-05	0.000495848	1.79689
CD81	ENSG00000110651	protein_coding	-0.384859	4.40696e-05	0.000496839	1.7944
AC092964.1	ENSG00000279862	TEC	0.36633	4.41523e-05	0.000497491	1.79267
PRR4	ENSG00000111215	protein_coding	-0.373864	4.42262e-05	0.000498043	1.79113
DGAT2	ENSG00000062282	protein_coding	0.520021	4.43947e-05	0.000499402	1.78763
SPRED1	ENSG00000166068	protein_coding	-0.502234	4.43968e-05	0.000499402	1.78758
NAMPTP1	ENSG00000229644	processed_pseudogene	0.695044	4.45076e-05	0.000500367	1.78529
A2MP1	ENSG00000256069	transcribed_unprocessed_pseudogene	-0.713075	4.48138e-05	0.000503243	1.77897
CCPG1	ENSG00000260916	protein_coding	0.374396	4.47901e-05	0.000503243	1.77946
AL365295.1	ENSG00000237356	lncRNA	-0.368908	4.50208e-05	0.000505284	1.77472
HIP1	ENSG00000127946	protein_coding	0.521606	4.51498e-05	0.000506448	1.77209
AC092745.5	ENSG00000286895	lncRNA	0.409496	4.53708e-05	0.000508642	1.76759
AC009495.3	ENSG00000235192	lncRNA	0.364629	4.55944e-05	0.000510575	1.76306
RN7SKP26	ENSG00000222179	misc_RNA	0.527349	4.55877e-05	0.000510575	1.7632
AC134349.2	ENSG00000256981	unprocessed_pseudogene	-0.364292	4.5719e-05	0.000511685	1.76055
VNN2	ENSG00000112303	protein_coding	0.583898	4.59515e-05	0.000513999	1.75587
AC004917.1	ENSG00000243797	lncRNA	0.765446	4.60342e-05	0.000514637	1.75422
AC078777.1	ENSG00000235872	lncRNA	-0.418007	4.6216e-05	0.00051638	1.75059
RN7SL752P	ENSG00000239437	misc_RNA	0.428813	4.64318e-05	0.000518501	1.7463
AC104695.4	ENSG00000270640	lncRNA	0.402141	4.65173e-05	0.000519166	1.7446
AC073655.1	ENSG00000258172	lncRNA	0.512431	4.68868e-05	0.000522999	1.73731
TRBJ2-2P	ENSG00000211766	TR_J_gene	-0.416936	4.72301e-05	0.000526534	1.73059
AC010210.1	ENSG00000250608	lncRNA	0.481362	4.73209e-05	0.000527252	1.72883
ZFP1	ENSG00000184517	protein_coding	-0.378926	4.74288e-05	0.00052816	1.72673
TRBV6-4	ENSG00000211713	TR_V_gene	-0.451154	4.75938e-05	0.000529703	1.72353
AC138969.1	ENSG00000183889	protein_coding	-0.369194	4.76458e-05	0.000529986	1.72252
TRAJ35	ENSG00000211854	TR_J_gene	-0.515999	4.77011e-05	0.000530306	1.72146
RNY1P10	ENSG00000200138	misc_RNA	0.440151	4.79601e-05	0.00053289	1.71647
AC002073.1	ENSG00000202019	misc_RNA	0.523594	4.807e-05	0.000533815	1.71436
HLA-DPB2	ENSG00000224557	transcribed_unprocessed_pseudogene	-0.416864	4.83148e-05	0.000535938	1.70968
PARP15	ENSG00000173200	protein_coding	-0.451927	4.82905e-05	0.000535938	1.71015
AC099791.2	ENSG00000271200	lncRNA	-0.358134	4.85067e-05	0.000537626	1.70603
ZNF382	ENSG00000161298	protein_coding	-0.405186	4.85207e-05	0.000537626	1.70577
ARMC12	ENSG00000157343	protein_coding	0.482316	4.87694e-05	0.000540082	1.70106
DHRS9	ENSG00000073737	protein_coding	0.610455	4.88757e-05	0.000540959	1.69905
AC087645.2	ENSG00000267737	lncRNA	0.523578	4.90221e-05	0.00054228	1.6963
SYT17	ENSG00000103528	protein_coding	-0.464702	4.93543e-05	0.000545653	1.69008
WDR66	ENSG00000158023	protein_coding	0.385239	4.93877e-05	0.00054572	1.68946
MIR5690	ENSG00000265527	miRNA	0.632701	4.94203e-05	0.000545779	1.68885
IGSF8	ENSG00000162729	protein_coding	-0.369299	4.94709e-05	0.000545865	1.68791
RHOH	ENSG00000168421	protein_coding	-0.446846	4.94827e-05	0.000545865	1.68769
RPS8	ENSG00000142937	protein_coding	-0.388911	4.95203e-05	0.00054598	1.68699
DTX3L	ENSG00000163840	protein_coding	0.40182	4.9589e-05	0.000546436	1.68571
PRR13	ENSG00000205352	protein_coding	0.363438	4.97145e-05	0.000547516	1.68338
TRAJ37	ENSG00000278661	TR_J_gene	-0.536713	4.98627e-05	0.000548846	1.68064
MAN2A2	ENSG00000196547	protein_coding	0.468689	4.99587e-05	0.000549406	1.67887
TRBV11-2	ENSG00000241657	lncRNA	-0.506616	4.99685e-05	0.000549406	1.67869
AC244453.2	ENSG00000233029	lncRNA	0.687258	5.01341e-05	0.000550622	1.67565
ADAM28	ENSG00000042980	protein_coding	-0.504887	5.01341e-05	0.000550622	1.67564
CD160	ENSG00000117281	protein_coding	-0.439628	5.02662e-05	0.000551165	1.67322
CDK14	ENSG00000058091	protein_coding	0.366464	5.02272e-05	0.000551165	1.67394
DNAJB13	ENSG00000187726	protein_coding	-0.41167	5.0263e-05	0.000551165	1.67328
GPSM3	ENSG00000213654	protein_coding	0.431438	5.03897e-05	0.000552216	1.67096
TRMT13	ENSG00000122435	protein_coding	-0.367848	5.04232e-05	0.00055228	1.67035
C12orf42	ENSG00000179088	protein_coding	-0.545781	5.07321e-05	0.000554752	1.66473
HRH2	ENSG00000113749	protein_coding	0.56521	5.07238e-05	0.000554752	1.66488
TMEM260	ENSG00000070269	protein_coding	0.378014	5.06916e-05	0.000554752	1.66546
ANKRD33B	ENSG00000164236	protein_coding	0.405887	5.08487e-05	0.00055542	1.66261
OR52B3P	ENSG00000175800	unitary_pseudogene	0.465728	5.08462e-05	0.00055542	1.66266
AC008124.1	ENSG00000273015	lncRNA	-0.366003	5.09844e-05	0.000556598	1.66016
AC017028.2	ENSG00000287405	lncRNA	0.502319	5.10666e-05	0.000557192	1.65868
BX539320.1	ENSG00000278869	lncRNA	0.493596	5.11325e-05	0.000557302	1.65749
SGCB	ENSG00000163069	protein_coding	-0.414459	5.11256e-05	0.000557302	1.65761
TGFA-IT1	ENSG00000224606	lncRNA	0.504198	5.12969e-05	0.00055879	1.65453
LIPC-AS1	ENSG00000259293	lncRNA	0.556327	5.13626e-05	0.000558897	1.65336
SIRPA	ENSG00000198053	protein_coding	0.489704	5.13479e-05	0.000558897	1.65362
BEND7	ENSG00000165626	protein_coding	0.65422	5.13978e-05	0.000558975	1.65273
NAP1L3	ENSG00000186310	protein_coding	-0.473458	5.14898e-05	0.000559672	1.65108
PAX3	ENSG00000135903	protein_coding	0.562318	5.15897e-05	0.000560222	1.64929
PHACTR1	ENSG00000112137	protein_coding	0.413144	5.15965e-05	0.000560222	1.64917
BAZ1A	ENSG00000198604	protein_coding	0.422198	5.16538e-05	0.00056054	1.64815
TMEM237	ENSG00000155755	protein_coding	-0.401942	5.1869e-05	0.00056257	1.64432
CCDC136	ENSG00000128596	protein_coding	-0.41104	5.20356e-05	0.000564072	1.64137
UPK1B	ENSG00000114638	protein_coding	0.427105	5.20644e-05	0.000564077	1.64086
SEMA4B	ENSG00000185033	protein_coding	0.432368	5.21056e-05	0.000564219	1.64013
EXT1	ENSG00000182197	protein_coding	0.369976	5.21886e-05	0.000564812	1.63867
UBE2D1	ENSG00000072401	protein_coding	0.473841	5.25264e-05	0.00056816	1.63273
AL137782.1	ENSG00000261553	lncRNA	-0.423253	5.27363e-05	0.000569199	1.62906
C1QBPP2	ENSG00000213409	processed_pseudogene	-0.373436	5.26848e-05	0.000569199	1.62996
CERKL	ENSG00000188452	protein_coding	-0.425556	5.27026e-05	0.000569199	1.62965
CYP4F3	ENSG00000186529	protein_coding	0.515168	5.27231e-05	0.000569199	1.62929
TRBV16	ENSG00000275243	TR_V_gene	-0.432027	5.2864e-05	0.00057027	1.62683
HEG1	ENSG00000173706	protein_coding	-0.479933	5.30451e-05	0.00057162	1.62369
IL1B	ENSG00000125538	protein_coding	0.513828	5.30463e-05	0.00057162	1.62366
AC092658.1	ENSG00000248196	processed_pseudogene	0.399035	5.31176e-05	0.000572079	1.62243
AC055753.1	ENSG00000249820	processed_pseudogene	-0.397537	5.3301e-05	0.000573746	1.61926
AC027279.1	ENSG00000260816	lncRNA	-0.442612	5.33964e-05	0.000574464	1.61761
PZP	ENSG00000126838	protein_coding	-0.719796	5.36007e-05	0.000576352	1.61409
CEP290	ENSG00000198707	protein_coding	-0.492214	5.41594e-05	0.000582046	1.60455
DISC1-IT1	ENSG00000226758	lncRNA	0.465104	5.42951e-05	0.000583191	1.60225
TLR4	ENSG00000136869	protein_coding	0.485089	5.47788e-05	0.000588071	1.59408
RCBTB2P1	ENSG00000235150	processed_pseudogene	0.573621	5.54587e-05	0.000595051	1.58273
CNN2	ENSG00000064666	protein_coding	0.439829	5.55358e-05	0.000595558	1.58145
AC103563.9	ENSG00000287362	lncRNA	-0.392827	5.5581e-05	0.000595724	1.58071
AC024940.6	ENSG00000275097	lncRNA	-0.34076	5.57728e-05	0.00059628	1.57754
AC106820.5	ENSG00000260874	lncRNA	-0.353158	5.57593e-05	0.00059628	1.57776
KLHDC1	ENSG00000197776	protein_coding	-0.348399	5.5782e-05	0.00059628	1.57738
PKIB	ENSG00000135549	protein_coding	-0.378979	5.57648e-05	0.00059628	1.57767
RNF157	ENSG00000141576	protein_coding	-0.500187	5.57254e-05	0.00059628	1.57832
ADM2	ENSG00000128165	protein_coding	0.394606	5.58951e-05	0.000596868	1.57552
RARA	ENSG00000131759	protein_coding	0.514224	5.58967e-05	0.000596868	1.57549
AL022097.1	ENSG00000270174	lncRNA	-0.397716	5.60609e-05	0.000598008	1.57279
BCL2A1	ENSG00000140379	protein_coding	0.664442	5.60632e-05	0.000598008	1.57276
TRBJ2-6	ENSG00000211770	TR_J_gene	-0.461652	5.63363e-05	0.000600601	1.56828
LINC01876	ENSG00000226383	lncRNA	-0.591923	5.64709e-05	0.000601339	1.56609
PHACTR3	ENSG00000087495	protein_coding	0.412753	5.64774e-05	0.000601339	1.56598
TRAV1-1	ENSG00000255569	TR_V_gene	-0.523195	5.64958e-05	0.000601339	1.56568
AC087286.1	ENSG00000259276	lncRNA	0.381814	5.66619e-05	0.000602786	1.56298
ITPR3	ENSG00000096433	protein_coding	-0.507966	5.67676e-05	0.00060359	1.56127
FBXL5	ENSG00000118564	protein_coding	0.450333	5.68794e-05	0.000604457	1.55946
MAML3	ENSG00000196782	protein_coding	0.455468	5.70747e-05	0.00060621	1.5563
RNU6-331P	ENSG00000207455	snRNA	0.372496	5.74363e-05	0.000609727	1.55049
AL353660.1	ENSG00000286330	lncRNA	-0.672067	5.78284e-05	0.000612344	1.54423
LINC01278	ENSG00000235437	lncRNA	-0.379895	5.77597e-05	0.000612344	1.54533
MMP25-AS1	ENSG00000261971	lncRNA	0.578225	5.78359e-05	0.000612344	1.54411
RPS6	ENSG00000137154	protein_coding	-0.369402	5.77613e-05	0.000612344	1.5453
SAMD15	ENSG00000100583	protein_coding	0.406328	5.77996e-05	0.000612344	1.54469
AL136038.6	ENSG00000270878	processed_pseudogene	-0.375829	5.7936e-05	0.000613079	1.54252
TAS2R39	ENSG00000236398	protein_coding	0.605661	5.81081e-05	0.000614575	1.53979
LINC02193	ENSG00000260923	lncRNA	0.657432	5.83159e-05	0.000616447	1.53651
AC005747.1	ENSG00000007237	protein_coding	0.586304	5.86662e-05	0.000619496	1.531
ADM5	ENSG00000224420	protein_coding	-0.37416	5.86408e-05	0.000619496	1.5314
LRRC4	ENSG00000128594	protein_coding	0.444846	5.87775e-05	0.000620343	1.52926
CYB5R2	ENSG00000166394	protein_coding	0.368069	5.90222e-05	0.000622597	1.52543
CEACAM1	ENSG00000079385	protein_coding	0.633276	5.91036e-05	0.000623127	1.52417
EDARADD	ENSG00000186197	protein_coding	-0.404969	5.95745e-05	0.00062743	1.51687
MRVI1	ENSG00000072952	protein_coding	0.550144	5.95532e-05	0.00062743	1.51719
KCNJ2	ENSG00000123700	protein_coding	0.541765	6.05259e-05	0.000637115	1.50229
STK3	ENSG00000104375	protein_coding	0.429238	6.05927e-05	0.000637483	1.50128
ALPL	ENSG00000162551	protein_coding	0.919431	6.0655e-05	0.000637803	1.50033
SNED1	ENSG00000162804	protein_coding	-0.392031	6.07948e-05	0.000638936	1.49821
AC013726.1	ENSG00000201013	misc_RNA	0.376269	6.09149e-05	0.000639862	1.4964
AC092868.2	ENSG00000259674	processed_pseudogene	-0.436508	6.0994e-05	0.000640357	1.49521
AC103563.2	ENSG00000231062	lncRNA	-0.493296	6.11211e-05	0.000641019	1.49329
ACSM3	ENSG00000005187	protein_coding	-0.563096	6.11044e-05	0.000641019	1.49354
AL359504.2	ENSG00000271576	lncRNA	-0.382165	6.13679e-05	0.000643269	1.48958
RPL12P18	ENSG00000213400	processed_pseudogene	-0.453779	6.1573e-05	0.000645081	1.48652
RNU1-27P	ENSG00000206596	snRNA	0.451374	6.17352e-05	0.000646442	1.4841
EIF2AK2	ENSG00000055332	protein_coding	0.512079	6.18641e-05	0.000647453	1.48218
ADIRF-AS1	ENSG00000272734	lncRNA	-0.383823	6.20204e-05	0.000648589	1.47986
AL390066.3	ENSG00000286276	lncRNA	0.447285	6.20376e-05	0.000648589	1.4796
NSG1	ENSG00000168824	protein_coding	-0.432652	6.21761e-05	0.000649698	1.47755
CD59	ENSG00000085063	protein_coding	0.478643	6.24389e-05	0.000652104	1.47367
AP000640.1	ENSG00000254477	lncRNA	0.394296	6.25372e-05	0.000652789	1.47223
AC242376.2	ENSG00000274471	transcribed_unprocessed_pseudogene	-0.407645	6.25785e-05	0.00065288	1.47162
ASB9P1	ENSG00000258527	processed_pseudogene	0.470411	6.26264e-05	0.000653039	1.47091
CACNA2D3	ENSG00000157445	protein_coding	-0.600287	6.27644e-05	0.000654137	1.46889
TM4SF19-AS1	ENSG00000235897	lncRNA	-0.351269	6.31819e-05	0.000658144	1.46279
SPON1	ENSG00000262655	protein_coding	-0.447208	6.33074e-05	0.000659108	1.46097
TRDC	ENSG00000211829	TR_C_gene	-0.636881	6.34913e-05	0.00066068	1.4583
RPL39P28	ENSG00000244432	processed_pseudogene	-0.480485	6.3723e-05	0.000662579	1.45495
SYNGR1	ENSG00000100321	protein_coding	-0.414432	6.37401e-05	0.000662579	1.4547
MIR342	ENSG00000199082	miRNA	-0.409653	6.39352e-05	0.000664262	1.45189
AC108925.1	ENSG00000286010	lncRNA	-0.66479	6.39847e-05	0.00066443	1.45118
MAB21L1	ENSG00000180660	protein_coding	-0.377234	6.40639e-05	0.000664908	1.45005
LINC02217	ENSG00000248455	lncRNA	0.679406	6.48427e-05	0.000672642	1.43893
MTCO3P11	ENSG00000237711	unprocessed_pseudogene	0.400002	6.49005e-05	0.000672893	1.43811
SELPLG	ENSG00000110876	protein_coding	0.39277	6.49528e-05	0.000673086	1.43737
FAM238A	ENSG00000233261	transcribed_unprocessed_pseudogene	0.34795	6.50607e-05	0.000673506	1.43585
LIPF	ENSG00000182333	protein_coding	0.562803	6.50367e-05	0.000673506	1.43619
AFF2	ENSG00000155966	protein_coding	0.450167	6.51402e-05	0.000673981	1.43473
AP003119.1	ENSG00000254632	lncRNA	0.494561	6.53756e-05	0.000676066	1.43141
ANKRD36B	ENSG00000196912	protein_coding	-0.561638	6.5858e-05	0.000680703	1.42465
KCTD15	ENSG00000153885	protein_coding	-0.374974	6.5943e-05	0.000681229	1.42346
AL139286.1	ENSG00000271164	processed_pseudogene	0.471442	6.60175e-05	0.000681647	1.42243
CEP72	ENSG00000112877	protein_coding	-0.366662	6.62568e-05	0.000683412	1.4191
RN7SL732P	ENSG00000264618	misc_RNA	0.367315	6.62247e-05	0.000683412	1.41954
TRAJ29	ENSG00000211860	TR_J_gene	-0.52925	6.64027e-05	0.000684564	1.41708
LINC01410	ENSG00000238113	lncRNA	0.385056	6.64515e-05	0.000684714	1.4164
DZIP3	ENSG00000198919	protein_coding	-0.39954	6.6521e-05	0.000685077	1.41544
GCA	ENSG00000115271	protein_coding	0.583183	6.6649e-05	0.000686042	1.41367
MFN2	ENSG00000116688	protein_coding	0.388238	6.67903e-05	0.000687143	1.41173
TRGC1	ENSG00000211689	TR_C_gene	-0.582716	6.6846e-05	0.000687363	1.41096
CHSY1	ENSG00000131873	protein_coding	0.384692	6.69728e-05	0.000687959	1.40922
TBX21	ENSG00000073861	protein_coding	-0.57914	6.6959e-05	0.000687959	1.40941
AC087257.1	ENSG00000248100	lncRNA	-0.362531	6.70387e-05	0.000688282	1.40831
LINC00161	ENSG00000226935	lncRNA	-0.454814	6.71824e-05	0.00068922	1.40635
TIFAB	ENSG00000255833	protein_coding	-0.501134	6.7199e-05	0.00068922	1.40612
AC132872.3	ENSG00000275888	lncRNA	0.432987	6.73715e-05	0.000690636	1.40376
AL109809.4	ENSG00000286288	lncRNA	0.461124	6.79484e-05	0.000696131	1.39592
AP001266.2	ENSG00000255557	lncRNA	0.441593	6.79771e-05	0.000696131	1.39554
SLC35A4	ENSG00000176087	protein_coding	0.391	6.80534e-05	0.000696555	1.3945
AC015912.2	ENSG00000262408	processed_pseudogene	0.438545	6.81726e-05	0.000697418	1.3929
AC016831.3	ENSG00000232716	processed_pseudogene	0.510144	6.83723e-05	0.000699025	1.39021
LINC01513	ENSG00000246016	lncRNA	0.492833	6.84139e-05	0.000699025	1.38965
SDCBPP1	ENSG00000226705	processed_pseudogene	0.645788	6.84346e-05	0.000699025	1.38937
ABTB1	ENSG00000114626	protein_coding	0.43861	6.88991e-05	0.000703411	1.38315
PBX4	ENSG00000105717	protein_coding	-0.375189	6.89649e-05	0.000703723	1.38228
MAGEH1	ENSG00000187601	protein_coding	-0.412827	6.91312e-05	0.000704744	1.38006
NEXMIF	ENSG00000050030	protein_coding	-0.507148	6.91354e-05	0.000704744	1.38001
TRAV29DV5	ENSG00000211810	TR_V_gene	-0.494884	6.92732e-05	0.000705789	1.37818
AL049597.2	ENSG00000261737	lncRNA	0.418468	6.95357e-05	0.000708102	1.3747
AC007272.2	ENSG00000273975	misc_RNA	0.384962	6.98831e-05	0.000710917	1.37012
TRBV6-8	ENSG00000253534	TR_V_gene	-0.422428	6.98755e-05	0.000710917	1.37022
AC095057.3	ENSG00000260296	lncRNA	-0.429556	7.00214e-05	0.000711961	1.3683
AL157400.4	ENSG00000240996	lncRNA	-0.415891	7.01804e-05	0.000713215	1.36622
TRBV6-6	ENSG00000211724	TR_V_gene	-0.49927	7.02319e-05	0.000713376	1.36554
AC079193.2	ENSG00000249258	lncRNA	-0.45015	7.03495e-05	0.000714208	1.36401
HHEX	ENSG00000152804	protein_coding	0.342425	7.05062e-05	0.000715436	1.36196
GOLGA8VP	ENSG00000259236	unprocessed_pseudogene	-0.391962	7.06512e-05	0.000716544	1.36007
AC114878.1	ENSG00000230718	processed_pseudogene	0.412352	7.09026e-05	0.000718001	1.35681
AL021393.1	ENSG00000226772	lncRNA	0.588018	7.08485e-05	0.000718001	1.35751
BCL3	ENSG00000069399	protein_coding	0.548371	7.09022e-05	0.000718001	1.35681
MIR663AHG	ENSG00000227195	lncRNA	-0.494822	7.09982e-05	0.000718605	1.35557
SLC66A2	ENSG00000122490	protein_coding	0.361613	7.10602e-05	0.000718869	1.35477
RNF149	ENSG00000163162	protein_coding	0.423122	7.11875e-05	0.000719792	1.35312
ZNF826P	ENSG00000231205	transcribed_unprocessed_pseudogene	-0.459427	7.12865e-05	0.00072043	1.35185
AQP3	ENSG00000165272	protein_coding	-0.513972	7.15526e-05	0.00072258	1.34842
FAM157B	ENSG00000233013	transcribed_unprocessed_pseudogene	0.476181	7.15715e-05	0.00072258	1.34818
MYO5B	ENSG00000167306	protein_coding	-0.430266	7.17532e-05	0.000723683	1.34585
TRBV27	ENSG00000211752	TR_V_gene	-0.521866	7.17406e-05	0.000723683	1.34601
MTATP6P11	ENSG00000228097	unprocessed_pseudogene	0.395382	7.19443e-05	0.000725245	1.3434
AL732406.1	ENSG00000286151	unprocessed_pseudogene	-0.433476	7.21421e-05	0.000726873	1.34088
ECHDC3	ENSG00000134463	protein_coding	0.742122	7.23043e-05	0.00072814	1.33882
CARD16	ENSG00000204397	protein_coding	0.44954	7.25846e-05	0.000730232	1.33526
CD180	ENSG00000134061	protein_coding	-0.40218	7.25851e-05	0.000730232	1.33526
MS4A4A	ENSG00000110079	protein_coding	0.608249	7.31492e-05	0.000735538	1.32814
LOXL1	ENSG00000129038	protein_coding	0.429076	7.3301e-05	0.000736387	1.32624
NLRP9P1	ENSG00000256581	unprocessed_pseudogene	0.482733	7.33073e-05	0.000736387	1.32616
RPL5P13	ENSG00000242134	processed_pseudogene	-0.477028	7.33916e-05	0.000736863	1.3251
ZNF677	ENSG00000197928	protein_coding	-0.347511	7.3562e-05	0.000738204	1.32297
CNGB1	ENSG00000070729	protein_coding	0.599998	7.36793e-05	0.00073901	1.32151
USP51	ENSG00000247746	protein_coding	-0.377102	7.37583e-05	0.000739432	1.32052
AP001628.1	ENSG00000225218	lncRNA	-0.380521	7.37996e-05	0.000739475	1.32001
EZHIP	ENSG00000187690	protein_coding	-0.391301	7.38654e-05	0.000739572	1.31919
[truncated: 4,296 more rows]

## Sheet: S file 1D
Supplementary file 1D – Common module assignment for 5000 most variant in all TBM cohort. The resulting 15 clusters are named by a module (i.e. a color, as is the default output by the WGCNA algorithm).
Ensembl ID	Gene symbol	Gene type	module
ENSG00000256069	A2MP1	transcribed_unprocessed_pseudogene	black
ENSG00000104970	KIR3DX1	transcribed_unprocessed_pseudogene	black
ENSG00000256667	KLRA1P	transcribed_unprocessed_pseudogene	black
ENSG00000213071	LPAL2	transcribed_unprocessed_pseudogene	black
ENSG00000172460	PRSS30P	transcribed_unitary_pseudogene	black
ENSG00000270977	AC015849.5	transcribed_processed_pseudogene	black
ENSG00000256553	TRAV1-2	TR_V_gene	black
ENSG00000211753	TRBV28	TR_V_gene	black
ENSG00000211804	TRDV1	TR_V_gene	black
ENSG00000256590	TRDV3	TR_V_gene	black
ENSG00000211694	TRGV10	TR_V_gene	black
ENSG00000233306	TRGV2	TR_V_gene	black
ENSG00000211699	TRGV3	TR_V_gene	black
ENSG00000211698	TRGV4	TR_V_gene	black
ENSG00000211697	TRGV5	TR_V_gene	black
ENSG00000211696	TRGV8	TR_V_gene	black
ENSG00000211695	TRGV9	TR_V_gene	black
ENSG00000211825	TRDJ1	TR_J_gene	black
ENSG00000211827	TRDJ2	TR_J_gene	black
ENSG00000211828	TRDJ3	TR_J_gene	black
ENSG00000211826	TRDJ4	TR_J_gene	black
ENSG00000211829	TRDC	TR_C_gene	black
ENSG00000211689	TRGC1	TR_C_gene	black
ENSG00000227191	TRGC2	TR_C_gene	black
ENSG00000175899	A2M	protein_coding	black
ENSG00000085563	ABCB1	protein_coding	black
ENSG00000205336	ADGRG1	protein_coding	black
ENSG00000159618	ADGRG5	protein_coding	black
ENSG00000214944	ARHGEF28	protein_coding	black
ENSG00000188042	ARL4C	protein_coding	black
ENSG00000109956	B3GAT1	protein_coding	black
ENSG00000125864	BFSP1	protein_coding	black
ENSG00000173068	BNC2	protein_coding	black
ENSG00000262874	C19orf84	protein_coding	black
ENSG00000116667	C1orf21	protein_coding	black
ENSG00000181215	C4orf50	protein_coding	black
ENSG00000186648	CARMIL3	protein_coding	black
ENSG00000179071	CCDC89	protein_coding	black
ENSG00000275302	CCL4	protein_coding	black
ENSG00000271503	CCL5	protein_coding	black
ENSG00000160791	CCR5	protein_coding	black
ENSG00000116824	CD2	protein_coding	black
ENSG00000198821	CD247	protein_coding	black
ENSG00000153563	CD8A	protein_coding	black
ENSG00000148019	CEP78	protein_coding	black
ENSG00000136213	CHST12	protein_coding	black
ENSG00000160318	CLDND2	protein_coding	black
ENSG00000169583	CLIC3	protein_coding	black
ENSG00000198756	COLGALT2	protein_coding	black
ENSG00000168329	CX3CR1	protein_coding	black
ENSG00000160882	CYP11B1	protein_coding	black
ENSG00000170967	DDI1	protein_coding	black
ENSG00000082458	DLG3	protein_coding	black
ENSG00000197057	DTHD1	protein_coding	black
ENSG00000158050	DUSP2	protein_coding	black
ENSG00000112796	ENPP5	protein_coding	black
ENSG00000163508	EOMES	protein_coding	black
ENSG00000117560	FASLG	protein_coding	black
ENSG00000160856	FCRL3	protein_coding	black
ENSG00000181036	FCRL6	protein_coding	black
ENSG00000137441	FGFBP2	protein_coding	black
ENSG00000147234	FRMPD3	protein_coding	black
ENSG00000162676	GFI1	protein_coding	black
ENSG00000149328	GLB1L2	protein_coding	black
ENSG00000115523	GNLY	protein_coding	black
ENSG00000174946	GPR171	protein_coding	black
ENSG00000147138	GPR174	protein_coding	black
ENSG00000145649	GZMA	protein_coding	black
ENSG00000100453	GZMB	protein_coding	black
ENSG00000100450	GZMH	protein_coding	black
ENSG00000113088	GZMK	protein_coding	black
ENSG00000197540	GZMM	protein_coding	black
ENSG00000171476	HOPX	protein_coding	black
ENSG00000111537	IFNG	protein_coding	black
ENSG00000100385	IL2RB	protein_coding	black
ENSG00000176049	JAKMIP2	protein_coding	black
ENSG00000196169	KIF19	protein_coding	black
ENSG00000139116	KIF21A	protein_coding	black
ENSG00000243772	KIR2DL3	protein_coding	black
ENSG00000240403	KIR3DL2	protein_coding	black
ENSG00000205809	KLRC2	protein_coding	black
ENSG00000205810	KLRC3	protein_coding	black
ENSG00000183542	KLRC4	protein_coding	black
ENSG00000255819	KLRC4-KLRK1	protein_coding	black
ENSG00000134539	KLRD1	protein_coding	black
ENSG00000150045	KLRF1	protein_coding	black
ENSG00000139187	KLRG1	protein_coding	black
ENSG00000213809	KLRK1	protein_coding	black
ENSG00000089692	LAG3	protein_coding	black
ENSG00000167618	LAIR2	protein_coding	black
ENSG00000162398	LEXM	protein_coding	black
ENSG00000133067	LGR6	protein_coding	black
ENSG00000105370	LIM2	protein_coding	black
ENSG00000007264	MATK	protein_coding	black
ENSG00000153898	MCOLN2	protein_coding	black
ENSG00000055732	MCOLN3	protein_coding	black
ENSG00000185697	MYBL1	protein_coding	black
ENSG00000071909	MYO3B	protein_coding	black
ENSG00000196586	MYO6	protein_coding	black
ENSG00000104490	NCALD	protein_coding	black
ENSG00000149294	NCAM1	protein_coding	black
ENSG00000105374	NKG7	protein_coding	black
ENSG00000171596	NMUR1	protein_coding	black
ENSG00000171246	NPTX1	protein_coding	black
ENSG00000074590	NUAK1	protein_coding	black
ENSG00000188389	PDCD1	protein_coding	black
ENSG00000170962	PDGFD	protein_coding	black
ENSG00000113721	PDGFRB	protein_coding	black
ENSG00000144824	PHLDB2	protein_coding	black
ENSG00000166289	PLEKHF1	protein_coding	black
ENSG00000174348	PODN	protein_coding	black
ENSG00000156475	PPP2R2B	protein_coding	black
ENSG00000180644	PRF1	protein_coding	black
ENSG00000135362	PRR5L	protein_coding	black
ENSG00000150687	PRSS23	protein_coding	black
ENSG00000168229	PTGDR	protein_coding	black
ENSG00000163564	PYHIN1	protein_coding	black
ENSG00000126838	PZP	protein_coding	black
ENSG00000069667	RORA	protein_coding	black
ENSG00000198963	RORB	protein_coding	black
ENSG00000133818	RRAS2	protein_coding	black
ENSG00000020633	RUNX3	protein_coding	black
ENSG00000180739	S1PR5	protein_coding	black
ENSG00000164483	SAMD3	protein_coding	black
ENSG00000170624	SGCD	protein_coding	black
ENSG00000183918	SH2D1A	protein_coding	black
ENSG00000198574	SH2D1B	protein_coding	black
ENSG00000162739	SLAMF6	protein_coding	black
ENSG00000162383	SLC1A7	protein_coding	black
ENSG00000080493	SLC4A4	protein_coding	black
ENSG00000166750	SLFN5	protein_coding	black
ENSG00000159674	SPON2	protein_coding	black
ENSG00000138378	STAT4	protein_coding	black
ENSG00000137501	SYTL2	protein_coding	black
ENSG00000109680	TBC1D19	protein_coding	black
ENSG00000073861	TBX21	protein_coding	black
ENSG00000069702	TGFBR3	protein_coding	black
ENSG00000181847	TIGIT	protein_coding	black
ENSG00000164342	TLR3	protein_coding	black
ENSG00000050730	TNIP3	protein_coding	black
ENSG00000104321	TRPA1	protein_coding	black
ENSG00000138741	TRPC3	protein_coding	black
ENSG00000141161	UNC45B	protein_coding	black
ENSG00000162692	VCAM1	protein_coding	black
ENSG00000205221	VIT	protein_coding	black
ENSG00000162643	WDR63	protein_coding	black
ENSG00000143185	XCL2	protein_coding	black
ENSG00000176083	ZNF683	protein_coding	black
ENSG00000236609	ZNF853	protein_coding	black
ENSG00000267369	AC015911.7	processed_pseudogene	black
ENSG00000267554	AC015911.8	processed_pseudogene	black
ENSG00000232036	AL078645.2	processed_pseudogene	black
ENSG00000256720	BTG1P1	processed_pseudogene	black
ENSG00000271005	CTHRC1P1	processed_pseudogene	black
ENSG00000267046	E2F3P1	processed_pseudogene	black
ENSG00000225079	FTH1P22	processed_pseudogene	black
ENSG00000213049	HNRNPA1P34	processed_pseudogene	black
ENSG00000256937	KRT17P8	processed_pseudogene	black
ENSG00000271013	LRRC37A9P	processed_pseudogene	black
ENSG00000282989	PDCL3P2	processed_pseudogene	black
ENSG00000256817	TPT1P12	processed_pseudogene	black
ENSG00000255776	VDAC2P2	processed_pseudogene	black
ENSG00000221957	KIR2DS4	polymorphic_pseudogene	black
ENSG00000245105	A2M-AS1	lncRNA	black
ENSG00000267731	AC005332.2	lncRNA	black
ENSG00000278740	AC005332.7	lncRNA	black
ENSG00000273824	AC008033.3	lncRNA	black
ENSG00000256427	AC010175.1	lncRNA	black
ENSG00000257642	AC011313.1	lncRNA	black
ENSG00000287630	AC011370.1	lncRNA	black
ENSG00000286065	AC015911.11	lncRNA	black
ENSG00000267074	AC015911.3	lncRNA	black
ENSG00000286942	AC017104.6	lncRNA	black
ENSG00000245648	AC022075.1	lncRNA	black
ENSG00000228334	AC024028.1	lncRNA	black
ENSG00000287958	AC092053.6	lncRNA	black
ENSG00000273179	AC092535.5	lncRNA	black
ENSG00000272763	AC103702.2	lncRNA	black
ENSG00000287786	AC113615.2	lncRNA	black
ENSG00000276241	AC243829.2	lncRNA	black
ENSG00000232855	AF165147.1	lncRNA	black
ENSG00000237422	AL158071.4	lncRNA	black
ENSG00000288016	AL162493.1	lncRNA	black
ENSG00000258379	AL355097.1	lncRNA	black
ENSG00000287277	AL392086.3	lncRNA	black
ENSG00000287989	AL450352.1	lncRNA	black
ENSG00000285847	AL713852.1	lncRNA	black
ENSG00000255548	AP003043.1	lncRNA	black
ENSG00000255545	AP004608.1	lncRNA	black
ENSG00000203280	KIAA1671-AS1	lncRNA	black
ENSG00000246526	LINC002481	lncRNA	black
ENSG00000232117	LINC00384	lncRNA	black
ENSG00000214851	LINC00612	lncRNA	black
ENSG00000238266	LINC00707	lncRNA	black
ENSG00000189238	LINC00943	lncRNA	black
ENSG00000256128	LINC00944	lncRNA	black
ENSG00000237248	LINC00987	lncRNA	black
ENSG00000235576	LINC01871	lncRNA	black
ENSG00000272282	LINC02084	lncRNA	black
ENSG00000244649	LINC02086	lncRNA	black
ENSG00000258869	LINC02312	lncRNA	black
ENSG00000251301	LINC02384	lncRNA	black
ENSG00000273415	LINC02725	lncRNA	black
ENSG00000255998	LINC02824	lncRNA	black
ENSG00000235531	MSC-AS1	lncRNA	black
ENSG00000231898	MYO3B-AS1	lncRNA	black
ENSG00000211670	IGLV3-9	IG_V_gene	black
ENSG00000111788	AC009533.1	unprocessed_pseudogene	blue
ENSG00000204745	AC083899.1	unprocessed_pseudogene	blue
ENSG00000276758	AC245884.12	unprocessed_pseudogene	blue
ENSG00000234436	AC245884.2	unprocessed_pseudogene	blue
ENSG00000274549	AL356274.1	unprocessed_pseudogene	blue
ENSG00000218809	AL391903.1	unprocessed_pseudogene	blue
ENSG00000284715	AP001153.1	unprocessed_pseudogene	blue
ENSG00000204933	CD177P1	unprocessed_pseudogene	blue
ENSG00000215630	GUSBP9	unprocessed_pseudogene	blue
ENSG00000216331	H1-12P	unprocessed_pseudogene	blue
ENSG00000237257	MTND2P8	unprocessed_pseudogene	blue
ENSG00000179978	NAIPP2	unprocessed_pseudogene	blue
ENSG00000165178	NCF1C	unprocessed_pseudogene	blue
ENSG00000256581	NLRP9P1	unprocessed_pseudogene	blue
ENSG00000168126	OR2W6P	unprocessed_pseudogene	blue
ENSG00000262980	OR52L2P	unprocessed_pseudogene	blue
ENSG00000224203	RPS23P10	unprocessed_pseudogene	blue
ENSG00000283444	GPR141BP	unitary_pseudogene	blue
ENSG00000175800	OR52B3P	unitary_pseudogene	blue
ENSG00000234895	OR52X1P	unitary_pseudogene	blue
ENSG00000286640	AC093151.5	transcribed_unprocessed_pseudogene	blue
ENSG00000215559	ANKRD20A11P	transcribed_unprocessed_pseudogene	blue
ENSG00000237438	CECR7	transcribed_unprocessed_pseudogene	blue
ENSG00000228314	CYP4F29P	transcribed_unprocessed_pseudogene	blue
ENSG00000236438	FAM157A	transcribed_unprocessed_pseudogene	blue
ENSG00000233013	FAM157B	transcribed_unprocessed_pseudogene	blue
ENSG00000160766	GBAP1	transcribed_unprocessed_pseudogene	blue
ENSG00000240268	MOXD2P	transcribed_unprocessed_pseudogene	blue
ENSG00000250687	NAIPP1	transcribed_unprocessed_pseudogene	blue
ENSG00000248477	NAIPP3	transcribed_unprocessed_pseudogene	blue
ENSG00000182487	NCF1B	transcribed_unprocessed_pseudogene	blue
ENSG00000171658	NMRAL2P	transcribed_unprocessed_pseudogene	blue
ENSG00000272595	OR10AH1P	transcribed_unprocessed_pseudogene	blue
ENSG00000254681	PKD1P5	transcribed_unprocessed_pseudogene	blue
ENSG00000232457	SLC16A6P1	transcribed_unprocessed_pseudogene	blue
ENSG00000184106	TREML3P	transcribed_unprocessed_pseudogene	blue
ENSG00000159247	TUBBP5	transcribed_unprocessed_pseudogene	blue
ENSG00000159904	ZNF890P	transcribed_unprocessed_pseudogene	blue
ENSG00000283602	AC116353.6	transcribed_unitary_pseudogene	blue
ENSG00000225873	C3orf86	transcribed_unitary_pseudogene	blue
ENSG00000246082	NUDT16P1	transcribed_unitary_pseudogene	blue
ENSG00000204791	SMPD5	transcribed_unitary_pseudogene	blue
ENSG00000249138	AC084871.1	transcribed_processed_pseudogene	blue
ENSG00000232450	AL133517.1	transcribed_processed_pseudogene	blue
ENSG00000228463	AP006222.1	transcribed_processed_pseudogene	blue
ENSG00000231345	BEND3P1	transcribed_processed_pseudogene	blue
ENSG00000271304	DPRXP2	transcribed_processed_pseudogene	blue
ENSG00000213492	NT5C3AP1	transcribed_processed_pseudogene	blue
ENSG00000211803	TRAV23DV6	TR_V_gene	blue
ENSG00000276953	TRBV12-4	TR_V_gene	blue
ENSG00000283063	TRBV6-2	TR_V_gene	blue
ENSG00000279825	AC003957.1	TEC	blue
ENSG00000279400	AC008957.3	TEC	blue
ENSG00000280276	AC009229.4	TEC	blue
ENSG00000279368	AL031123.3	TEC	blue
ENSG00000279164	AL118508.2	TEC	blue
ENSG00000279511	AL356274.2	TEC	blue
ENSG00000200795	RNU4-1	snRNA	blue
ENSG00000202538	RNU4-2	snRNA	blue
ENSG00000252908	RNU6-1003P	snRNA	blue
ENSG00000200087	SNORA73B	snoRNA	blue
ENSG00000222489	SNORA79B	snoRNA	blue
ENSG00000165029	ABCA1	protein_coding	blue
ENSG00000131969	ABHD12B	protein_coding	blue
ENSG00000260234	AC020636.2	protein_coding	blue
ENSG00000285938	AC072022.2	protein_coding	blue
ENSG00000176244	ACBD7	protein_coding	blue
ENSG00000110455	ACCS	protein_coding	blue
ENSG00000151726	ACSL1	protein_coding	blue
ENSG00000111058	ACSS3	protein_coding	blue
ENSG00000148848	ADAM12	protein_coding	blue
ENSG00000154736	ADAMTS5	protein_coding	blue
ENSG00000138031	ADCY3	protein_coding	blue
ENSG00000129467	ADCY4	protein_coding	blue
ENSG00000118492	ADGB	protein_coding	blue
ENSG00000152990	ADGRA3	protein_coding	blue
ENSG00000111452	ADGRD1	protein_coding	blue
ENSG00000182885	ADGRG3	protein_coding	blue
ENSG00000148926	ADM	protein_coding	blue
ENSG00000155966	AFF2	protein_coding	blue
ENSG00000160224	AIRE	protein_coding	blue
ENSG00000282988	AL031777.2	protein_coding	blue
ENSG00000285444	AL162377.3	protein_coding	blue
ENSG00000278384	AL354822.1	protein_coding	blue
ENSG00000128918	ALDH1A2	protein_coding	blue
ENSG00000132965	ALOX5AP	protein_coding	blue
ENSG00000162551	ALPL	protein_coding	blue
ENSG00000189127	ANKRD34B	protein_coding	blue
ENSG00000011201	ANOS1	protein_coding	blue
ENSG00000138772	ANXA3	protein_coding	blue
ENSG00000103723	AP3B2	protein_coding	blue
ENSG00000163697	APBB2	protein_coding	blue
ENSG00000101474	APMAP	protein_coding	blue
ENSG00000128383	APOBEC3A	protein_coding	blue
ENSG00000103569	AQP9	protein_coding	blue
ENSG00000128805	ARHGAP22	protein_coding	blue
ENSG00000137962	ARHGAP29	protein_coding	blue
ENSG00000157343	ARMC12	protein_coding	blue
ENSG00000242498	ARPIN	protein_coding	blue
ENSG00000113369	ARRDC3	protein_coding	blue
ENSG00000198363	ASPH	protein_coding	blue
ENSG00000054793	ATP9A	protein_coding	blue
ENSG00000169255	B3GALNT1	protein_coding	blue
ENSG00000176597	B3GNT5	protein_coding	blue
ENSG00000158470	B4GALT5	protein_coding	blue
ENSG00000176788	BASP1	protein_coding	blue
ENSG00000060982	BCAT1	protein_coding	blue
ENSG00000140379	BCL2A1	protein_coding	blue
ENSG00000113916	BCL6	protein_coding	blue
ENSG00000165626	BEND7	protein_coding	blue
ENSG00000102010	BMX	protein_coding	blue
ENSG00000162399	BSND	protein_coding	blue
ENSG00000113303	BTNL8	protein_coding	blue
ENSG00000165810	BTNL9	protein_coding	blue
ENSG00000171860	C3AR1	protein_coding	blue
ENSG00000185056	C5orf47	protein_coding	blue
ENSG00000225940	C5orf67	protein_coding	blue
ENSG00000253250	C8orf88	protein_coding	blue
ENSG00000074410	CA12	protein_coding	blue
ENSG00000167434	CA4	protein_coding	blue
ENSG00000198216	CACNA1E	protein_coding	blue
ENSG00000157445	CACNA2D3	protein_coding	blue
ENSG00000162949	CAPN13	protein_coding	blue
ENSG00000256812	CAPNS2	protein_coding	blue
ENSG00000137757	CASP5	protein_coding	blue
ENSG00000160200	CBS	protein_coding	blue
ENSG00000274276	CBSL	protein_coding	blue
ENSG00000048342	CC2D2A	protein_coding	blue
ENSG00000253276	CCDC71L	protein_coding	blue
ENSG00000133101	CCNA1	protein_coding	blue
ENSG00000135083	CCNJL	protein_coding	blue
ENSG00000204936	CD177	protein_coding	blue
ENSG00000158481	CD1C	protein_coding	blue
ENSG00000158488	CD1E	protein_coding	blue
ENSG00000196352	CD55	protein_coding	blue
ENSG00000085063	CD59	protein_coding	blue
ENSG00000176749	CDK5R1	protein_coding	blue
ENSG00000163624	CDS1	protein_coding	blue
ENSG00000079385	CEACAM1	protein_coding	blue
ENSG00000170956	CEACAM3	protein_coding	blue
ENSG00000105352	CEACAM4	protein_coding	blue
ENSG00000172216	CEBPB	protein_coding	blue
ENSG00000221869	CEBPD	protein_coding	blue
ENSG00000123219	CENPK	protein_coding	blue
ENSG00000188596	CFAP54	protein_coding	blue
ENSG00000120051	CFAP58	protein_coding	blue
ENSG00000133063	CHIT1	protein_coding	blue
ENSG00000164695	CHMP4C	protein_coding	blue
ENSG00000136026	CKAP4	protein_coding	blue
ENSG00000166527	CLEC4D	protein_coding	blue
ENSG00000166523	CLEC4E	protein_coding	blue
ENSG00000152672	CLEC4F	protein_coding	blue
ENSG00000258227	CLEC5A	protein_coding	blue
ENSG00000205846	CLEC6A	protein_coding	blue
ENSG00000163646	CLRN1	protein_coding	blue
ENSG00000140932	CMTM2	protein_coding	blue
ENSG00000070729	CNGB1	protein_coding	blue
ENSG00000188822	CNR2	protein_coding	blue
ENSG00000106714	CNTNAP3	protein_coding	blue
ENSG00000283378	CNTNAP3C	protein_coding	blue
ENSG00000197467	COL13A1	protein_coding	blue
ENSG00000092758	COL9A3	protein_coding	blue
ENSG00000108582	CPD	protein_coding	blue
ENSG00000109472	CPE	protein_coding	blue
ENSG00000203710	CR1	protein_coding	blue
ENSG00000146592	CREB5	protein_coding	blue
ENSG00000103196	CRISPLD2	protein_coding	blue
ENSG00000147408	CSGALNACT1	protein_coding	blue
ENSG00000180138	CSNK1A1L	protein_coding	blue
ENSG00000077984	CST7	protein_coding	blue
ENSG00000161921	CXCL16	protein_coding	blue
ENSG00000163464	CXCR1	protein_coding	blue
ENSG00000180871	CXCR2	protein_coding	blue
ENSG00000137869	CYP19A1	protein_coding	blue
ENSG00000138061	CYP1B1	protein_coding	blue
ENSG00000186529	CYP4F3	protein_coding	blue
ENSG00000120306	CYSTM1	protein_coding	blue
ENSG00000276644	DACH1	protein_coding	blue
ENSG00000213722	DDAH2	protein_coding	blue
ENSG00000013573	DDX11	protein_coding	blue
ENSG00000062282	DGAT2	protein_coding	blue
ENSG00000167536	DHRS13	protein_coding	blue
ENSG00000118997	DNAH7	protein_coding	blue
ENSG00000128512	DOCK4	protein_coding	blue
ENSG00000134755	DSC2	protein_coding	blue
ENSG00000120129	DUSP1	protein_coding	blue
ENSG00000079393	DUSP13	protein_coding	blue
ENSG00000136160	EDNRB	protein_coding	blue
ENSG00000203666	EFCAB2	protein_coding	blue
ENSG00000118402	ELOVL4	protein_coding	blue
ENSG00000116016	EPAS1	protein_coding	blue
ENSG00000095203	EPB41L4B	protein_coding	blue
ENSG00000196411	EPHB4	protein_coding	blue
ENSG00000113719	ERGIC1	protein_coding	blue
ENSG00000107566	ERLIN1	protein_coding	blue
ENSG00000157557	ETS2	protein_coding	blue
ENSG00000164251	F2RL1	protein_coding	blue
ENSG00000198734	F5	protein_coding	blue
ENSG00000145384	FABP2	protein_coding	blue
ENSG00000184731	FAM110C	protein_coding	blue
ENSG00000155744	FAM126B	protein_coding	blue
ENSG00000283597	FAM169B	protein_coding	blue
ENSG00000163520	FBLN2	protein_coding	blue
ENSG00000161040	FBXL13	protein_coding	blue
ENSG00000118564	FBXL5	protein_coding	blue
ENSG00000186431	FCAR	protein_coding	blue
ENSG00000158869	FCER1G	protein_coding	blue
ENSG00000143226	FCGR2A	protein_coding	blue
ENSG00000162747	FCGR3B	protein_coding	blue
ENSG00000126262	FFAR2	protein_coding	blue
ENSG00000185897	FFAR3	protein_coding	blue
ENSG00000129682	FGF13	protein_coding	blue
ENSG00000137312	FLOT1	protein_coding	blue
ENSG00000102755	FLT1	protein_coding	blue
ENSG00000119686	FLVCR2	protein_coding	blue
ENSG00000115414	FN1	protein_coding	blue
ENSG00000110203	FOLR3	protein_coding	blue
ENSG00000170345	FOS	protein_coding	blue
ENSG00000171051	FPR1	protein_coding	blue
ENSG00000171049	FPR2	protein_coding	blue
ENSG00000053108	FSTL4	protein_coding	blue
ENSG00000167996	FTH1	protein_coding	blue
ENSG00000180549	FUT7	protein_coding	blue
ENSG00000123689	G0S2	protein_coding	blue
ENSG00000111886	GABRR2	protein_coding	blue
ENSG00000116717	GADD45A	protein_coding	blue
ENSG00000158089	GALNT14	protein_coding	blue
ENSG00000115271	GCA	protein_coding	blue
ENSG00000134864	GGACT	protein_coding	blue
ENSG00000121742	GJB6	protein_coding	blue
ENSG00000198814	GK	protein_coding	blue
ENSG00000229894	GK3P	protein_coding	blue
ENSG00000107249	GLIS3	protein_coding	blue
ENSG00000151948	GLT1D1	protein_coding	blue
ENSG00000138678	GPAT3	protein_coding	blue
ENSG00000187037	GPR141	protein_coding	blue
ENSG00000173890	GPR160	protein_coding	blue
ENSG00000170837	GPR27	protein_coding	blue
ENSG00000126251	GPR42	protein_coding	blue
ENSG00000139572	GPR84	protein_coding	blue
ENSG00000106070	GRB10	protein_coding	blue
ENSG00000213366	GSTM2	protein_coding	blue
ENSG00000168765	GSTM4	protein_coding	blue
ENSG00000070019	GUCY2C	protein_coding	blue
ENSG00000163754	GYG1	protein_coding	blue
ENSG00000187475	H1-6	protein_coding	blue
ENSG00000084110	HAL	protein_coding	blue
ENSG00000182782	HCAR2	protein_coding	blue
ENSG00000255398	HCAR3	protein_coding	blue
ENSG00000048052	HDAC9	protein_coding	blue
ENSG00000138411	HECW2	protein_coding	blue
ENSG00000160883	HK3	protein_coding	blue
ENSG00000231389	HLA-DPA1	protein_coding	blue
ENSG00000196735	HLA-DQA1	protein_coding	blue
ENSG00000179344	HLA-DQB1	protein_coding	blue
ENSG00000204632	HLA-G	protein_coding	blue
ENSG00000143452	HORMAD1	protein_coding	blue
ENSG00000257017	HP	protein_coding	blue
ENSG00000099377	HSD3B7	protein_coding	blue
ENSG00000204389	HSPA1A	protein_coding	blue
ENSG00000204388	HSPA1B	protein_coding	blue
ENSG00000173110	HSPA6	protein_coding	blue
ENSG00000185201	IFITM2	protein_coding	blue
ENSG00000142089	IFITM3	protein_coding	blue
ENSG00000115457	IGFBP2	protein_coding	blue
ENSG00000115604	IL18R1	protein_coding	blue
ENSG00000115607	IL18RAP	protein_coding	blue
ENSG00000125538	IL1B	protein_coding	blue
ENSG00000115594	IL1R1	protein_coding	blue
ENSG00000115590	IL1R2	protein_coding	blue
ENSG00000196083	IL1RAP	protein_coding	blue
ENSG00000115598	IL1RL2	protein_coding	blue
ENSG00000136689	IL1RN	protein_coding	blue
ENSG00000162594	IL23R	protein_coding	blue
ENSG00000077238	IL4R	protein_coding	blue
ENSG00000163083	INHBB	protein_coding	blue
ENSG00000188487	INSC	protein_coding	blue
ENSG00000248099	INSL3	protein_coding	blue
ENSG00000090376	IRAK3	protein_coding	blue
ENSG00000119669	IRF2BPL	protein_coding	blue
ENSG00000185950	IRS2	protein_coding	blue
ENSG00000135424	ITGA7	protein_coding	blue
ENSG00000132470	ITGB4	protein_coding	blue
ENSG00000189337	KAZN	protein_coding	blue
ENSG00000120696	KBTBD7	protein_coding	blue
ENSG00000276289	KCNE1B	protein_coding	blue
ENSG00000184611	KCNH7	protein_coding	blue
ENSG00000157551	KCNJ15	protein_coding	blue
ENSG00000123700	KCNJ2	protein_coding	blue
ENSG00000137261	KIAA0319	protein_coding	blue
ENSG00000185261	KIAA0825	protein_coding	blue
ENSG00000054523	KIF1B	protein_coding	blue
ENSG00000165115	KIF27	protein_coding	blue
ENSG00000133116	KL	protein_coding	blue
ENSG00000266265	KLF14	protein_coding	blue
ENSG00000102554	KLF5	protein_coding	blue
ENSG00000185909	KLHDC8B	protein_coding	blue
ENSG00000109466	KLHL2	protein_coding	blue
ENSG00000183762	KREMEN1	protein_coding	blue
ENSG00000108244	KRT23	protein_coding	blue
ENSG00000115919	KYNU	protein_coding	blue
ENSG00000100079	LGALS2	protein_coding	blue
ENSG00000113594	LIFR	protein_coding	blue
ENSG00000187116	LILRA5	protein_coding	blue
ENSG00000244482	LILRA6	protein_coding	blue
ENSG00000204577	LILRB3	protein_coding	blue
ENSG00000182541	LIMK2	protein_coding	blue
ENSG00000072163	LIMS2	protein_coding	blue
ENSG00000111052	LIN7A	protein_coding	blue
ENSG00000174482	LINGO2	protein_coding	blue
ENSG00000182333	LIPF	protein_coding	blue
ENSG00000204022	LIPJ	protein_coding	blue
ENSG00000204021	LIPK	protein_coding	blue
ENSG00000204020	LIPN	protein_coding	blue
ENSG00000113368	LMNB1	protein_coding	blue
ENSG00000087253	LPCAT2	protein_coding	blue
ENSG00000171236	LRG1	protein_coding	blue
ENSG00000168702	LRP1B	protein_coding	blue
ENSG00000128606	LRRC17	protein_coding	blue
ENSG00000129295	LRRC6	protein_coding	blue
ENSG00000188906	LRRK2	protein_coding	blue
ENSG00000175928	LRRN1	protein_coding	blue
ENSG00000181016	LSMEM1	protein_coding	blue
ENSG00000213903	LTB4R	protein_coding	blue
ENSG00000154589	LY96	protein_coding	blue
ENSG00000173212	MAB21L3	protein_coding	blue
ENSG00000111837	MAK	protein_coding	blue
ENSG00000111261	MANSC1	protein_coding	blue
ENSG00000189221	MAOA	protein_coding	blue
ENSG00000108984	MAP2K6	protein_coding	blue
ENSG00000091436	MAP3K20	protein_coding	blue
ENSG00000112062	MAPK14	protein_coding	blue
ENSG00000173926	MARCHF3	protein_coding	blue
ENSG00000277443	MARCKS	protein_coding	blue
ENSG00000180611	MB21D2	protein_coding	blue
ENSG00000183019	MCEMP1	protein_coding	blue
ENSG00000140563	MCTP2	protein_coding	blue
ENSG00000170439	METTL7B	protein_coding	blue
ENSG00000257335	MGAM	protein_coding	blue
ENSG00000257743	MGAM2	protein_coding	blue
ENSG00000271605	MILR1	protein_coding	blue
ENSG00000214237	MINDY4B	protein_coding	blue
ENSG00000196549	MME	protein_coding	blue
ENSG00000100985	MMP9	protein_coding	blue
ENSG00000072952	MRVI1	protein_coding	blue
ENSG00000110079	MS4A4A	protein_coding	blue
ENSG00000198736	MSRB1	protein_coding	blue
ENSG00000148450	MSRB2	protein_coding	blue
ENSG00000186205	MTARC1	protein_coding	blue
ENSG00000059728	MXD1	protein_coding	blue
ENSG00000145555	MYO10	protein_coding	blue
ENSG00000169994	MYO7B	protein_coding	blue
ENSG00000249437	NAIP	protein_coding	blue
ENSG00000105835	NAMPT	protein_coding	blue
ENSG00000158747	NBL1	protein_coding	blue
ENSG00000158517	NCF1	protein_coding	blue
ENSG00000119013	NDUFB3	protein_coding	blue
ENSG00000123119	NECAB1	protein_coding	blue
ENSG00000130202	NECTIN2	protein_coding	blue
ENSG00000123405	NFE2	protein_coding	blue
ENSG00000230257	NFE4	protein_coding	blue
ENSG00000165030	NFIL3	protein_coding	blue
ENSG00000100906	NFKBIA	protein_coding	blue
ENSG00000135842	NIBAN1	protein_coding	blue
ENSG00000091106	NLRC4	protein_coding	blue
ENSG00000174885	NLRP6	protein_coding	blue
ENSG00000167207	NOD2	protein_coding	blue
ENSG00000124588	NQO2	protein_coding	blue
ENSG00000112333	NR2E1	protein_coding	blue
ENSG00000170091	NSG2	protein_coding	blue
ENSG00000179299	NSUN7	protein_coding	blue
ENSG00000141698	NT5C3B	protein_coding	blue
ENSG00000074527	NTN4	protein_coding	blue
ENSG00000176046	NUPR1	protein_coding	blue
ENSG00000188039	NWD1	protein_coding	blue
ENSG00000152463	OLAH	protein_coding	blue
ENSG00000130558	OLFM1	protein_coding	blue
ENSG00000285231	OOSP3	protein_coding	blue
ENSG00000178814	OPLAH	protein_coding	blue
ENSG00000168131	OR2B2	protein_coding	blue
ENSG00000124657	OR2B6	protein_coding	blue
ENSG00000229314	ORM1	protein_coding	blue
ENSG00000079156	OSBPL6	protein_coding	blue
ENSG00000099985	OSM	protein_coding	blue
ENSG00000124507	PACSIN1	protein_coding	blue
ENSG00000159339	PADI4	protein_coding	blue
ENSG00000160191	PDE9A	protein_coding	blue
ENSG00000123836	PFKFB2	protein_coding	blue
ENSG00000170525	PFKFB3	protein_coding	blue
ENSG00000142657	PGD	protein_coding	blue
ENSG00000008438	PGLYRP1	protein_coding	blue
ENSG00000154330	PGM5	protein_coding	blue
ENSG00000087157	PGS1	protein_coding	blue
ENSG00000134686	PHC2	protein_coding	blue
ENSG00000153823	PID1	protein_coding	blue
ENSG00000108474	PIGL	protein_coding	blue
ENSG00000146070	PLA2G7	protein_coding	blue
ENSG00000122861	PLAU	protein_coding	blue
ENSG00000163803	PLB1	protein_coding	blue
ENSG00000166428	PLD4	protein_coding	blue
ENSG00000214456	PLIN5	protein_coding	blue
ENSG00000180316	PNPLA1	protein_coding	blue
ENSG00000173281	PPP1R3B	protein_coding	blue
ENSG00000138738	PRDM5	protein_coding	blue
ENSG00000113494	PRLR	protein_coding	blue
ENSG00000163421	PROK2	protein_coding	blue
ENSG00000135378	PRRG4	protein_coding	blue
ENSG00000148344	PTGES	protein_coding	blue
ENSG00000122420	PTGFR	protein_coding	blue
ENSG00000155093	PTPRN2	protein_coding	blue
ENSG00000100504	PYGL	protein_coding	blue
ENSG00000115828	QPCT	protein_coding	blue
ENSG00000146955	RAB19	protein_coding	blue
ENSG00000100228	RAB36	protein_coding	blue
ENSG00000144118	RALB	protein_coding	blue
ENSG00000163694	RBM47	protein_coding	blue
ENSG00000227729	RD3L	protein_coding	blue
ENSG00000169891	REPS2	protein_coding	blue
ENSG00000104918	RETN	protein_coding	blue
ENSG00000159496	RGL4	protein_coding	blue
ENSG00000116741	RGS2	protein_coding	blue
ENSG00000137393	RNF144B	protein_coding	blue
ENSG00000145428	RNF175	protein_coding	blue
ENSG00000145491	ROPN1L	protein_coding	blue
ENSG00000143365	RORC	protein_coding	blue
ENSG00000100218	RSPH14	protein_coding	blue
ENSG00000163191	S100A11	protein_coding	blue
ENSG00000163221	S100A12	protein_coding	blue
ENSG00000163220	S100A9	protein_coding	blue
ENSG00000163993	S100P	protein_coding	blue
ENSG00000155307	SAMSN1	protein_coding	blue
ENSG00000111961	SASH1	protein_coding	blue
ENSG00000169432	SCN9A	protein_coding	blue
ENSG00000141574	SECTM1	protein_coding	blue
ENSG00000188404	SELL	protein_coding	blue
ENSG00000167680	SEMA6B	protein_coding	blue
ENSG00000021355	SERPINB1	protein_coding	blue
ENSG00000197632	SERPINB2	protein_coding	blue
ENSG00000100095	SEZ6L	protein_coding	blue
ENSG00000164023	SGMS2	protein_coding	blue
ENSG00000156463	SH3RF2	protein_coding	blue
ENSG00000165181	SHOC1	protein_coding	blue
ENSG00000168779	SHOX2	protein_coding	blue
ENSG00000158352	SHROOM4	protein_coding	blue
ENSG00000105501	SIGLEC5	protein_coding	blue
ENSG00000116991	SIPA1L2	protein_coding	blue
ENSG00000018280	SLC11A1	protein_coding	blue
ENSG00000079215	SLC1A3	protein_coding	blue
ENSG00000197208	SLC22A4	protein_coding	blue
ENSG00000112053	SLC26A8	protein_coding	blue
ENSG00000173262	SLC2A14	protein_coding	blue
ENSG00000059804	SLC2A3	protein_coding	blue
ENSG00000136867	SLC31A2	protein_coding	blue
ENSG00000157800	SLC37A3	protein_coding	blue
ENSG00000138449	SLC40A1	protein_coding	blue
ENSG00000144290	SLC4A10	protein_coding	blue
ENSG00000151012	SLC7A11	protein_coding	blue
ENSG00000183023	SLC8A1	protein_coding	blue
ENSG00000180251	SLC9A4	protein_coding	blue
ENSG00000101187	SLCO4A1	protein_coding	blue
ENSG00000124107	SLPI	protein_coding	blue
ENSG00000172594	SMPDL3A	protein_coding	blue
ENSG00000184557	SOCS3	protein_coding	blue
ENSG00000285441	SOD2	protein_coding	blue
ENSG00000134243	SORT1	protein_coding	blue
ENSG00000166068	SPRED1	protein_coding	blue
ENSG00000122862	SRGN	protein_coding	blue
ENSG00000096063	SRPK1	protein_coding	blue
ENSG00000110080	ST3GAL4	protein_coding	blue
ENSG00000184005	ST6GALNAC3	protein_coding	blue
ENSG00000127954	STEAP4	protein_coding	blue
ENSG00000148175	STOM	protein_coding	blue
ENSG00000135604	STX11	protein_coding	blue
ENSG00000198829	SUCNR1	protein_coding	blue
ENSG00000173597	SULT1B1	protein_coding	blue
ENSG00000157152	SYN2	protein_coding	blue
ENSG00000146399	TAAR1	protein_coding	blue
ENSG00000158710	TAGLN2	protein_coding	blue
ENSG00000236398	TAS2R39	protein_coding	blue
ENSG00000221937	TAS2R40	protein_coding	blue
ENSG00000180113	TDRD6	protein_coding	blue
ENSG00000156414	TDRD9	protein_coding	blue
ENSG00000196663	TECPR2	protein_coding	blue
ENSG00000042832	TG	protein_coding	blue
ENSG00000163235	TGFA	protein_coding	blue
ENSG00000178726	THBD	protein_coding	blue
ENSG00000255833	TIFAB	protein_coding	blue
ENSG00000137462	TLR2	protein_coding	blue
ENSG00000136869	TLR4	protein_coding	blue
ENSG00000187554	TLR5	protein_coding	blue
ENSG00000101916	TLR8	protein_coding	blue
ENSG00000183160	TMEM119	protein_coding	blue
ENSG00000151952	TMEM132D	protein_coding	blue
ENSG00000146859	TMEM140	protein_coding	blue
ENSG00000181778	TMEM252	protein_coding	blue
ENSG00000281106	TMEM272	protein_coding	blue
ENSG00000181458	TMEM45A	protein_coding	blue
ENSG00000151715	TMEM45B	protein_coding	blue
ENSG00000183578	TNFAIP8L3	protein_coding	blue
ENSG00000173535	TNFRSF10C	protein_coding	blue
ENSG00000116147	TNR	protein_coding	blue
ENSG00000169902	TPST1	protein_coding	blue
ENSG00000124731	TREM1	protein_coding	blue
ENSG00000173334	TRIB1	protein_coding	blue
ENSG00000121060	TRIM25	protein_coding	blue
ENSG00000100505	TRIM9	protein_coding	blue
ENSG00000119121	TRPM6	protein_coding	blue
ENSG00000157514	TSC22D3	protein_coding	blue
ENSG00000121297	TSHZ3	protein_coding	blue
ENSG00000105948	TTC26	protein_coding	blue
ENSG00000133985	TTC9	protein_coding	blue
ENSG00000143367	TUFT1	protein_coding	blue
ENSG00000136810	TXN	protein_coding	blue
ENSG00000072401	UBE2D1	protein_coding	blue
ENSG00000100024	UPB1	protein_coding	blue
ENSG00000183696	UPP1	protein_coding	blue
ENSG00000112299	VNN1	protein_coding	blue
ENSG00000112303	VNN2	protein_coding	blue
ENSG00000093134	VNN3	protein_coding	blue
ENSG00000075399	VPS9D1	protein_coding	blue
ENSG00000155659	VSIG4	protein_coding	blue
ENSG00000163625	WDFY3	protein_coding	blue
ENSG00000116729	WLS	protein_coding	blue
ENSG00000143184	XCL1	protein_coding	blue
ENSG00000206077	ZDHHC11B	protein_coding	blue
ENSG00000163958	ZDHHC19	protein_coding	blue
ENSG00000165061	ZMAT4	protein_coding	blue
ENSG00000197013	ZNF429	protein_coding	blue
ENSG00000183621	ZNF438	protein_coding	blue
ENSG00000198342	ZNF442	protein_coding	blue
ENSG00000223547	ZNF844	protein_coding	blue
ENSG00000234358	AC003080.1	processed_pseudogene	blue
ENSG00000256708	AC007458.1	processed_pseudogene	blue
ENSG00000225402	AC010878.1	processed_pseudogene	blue
ENSG00000267293	AC012569.1	processed_pseudogene	blue
ENSG00000284167	AC013437.2	processed_pseudogene	blue
ENSG00000232716	AC016831.3	processed_pseudogene	blue
ENSG00000259496	AC021818.2	processed_pseudogene	blue
ENSG00000240934	AC066616.1	processed_pseudogene	blue
ENSG00000259600	AC066616.2	processed_pseudogene	blue
ENSG00000213557	AC068050.1	processed_pseudogene	blue
ENSG00000258215	AC078886.1	processed_pseudogene	blue
ENSG00000232578	AC093311.1	processed_pseudogene	blue
ENSG00000259707	AC105339.4	processed_pseudogene	blue
ENSG00000258632	AC135626.1	processed_pseudogene	blue
ENSG00000233974	AC138951.1	processed_pseudogene	blue
ENSG00000273644	AC215522.1	processed_pseudogene	blue
ENSG00000235081	AC245052.3	processed_pseudogene	blue
ENSG00000232599	AL008707.1	processed_pseudogene	blue
ENSG00000217275	AL031777.1	processed_pseudogene	blue
ENSG00000224025	AL353616.1	processed_pseudogene	blue
ENSG00000224067	AL354877.1	processed_pseudogene	blue
ENSG00000258878	AL355076.3	processed_pseudogene	blue
ENSG00000178146	AL672207.1	processed_pseudogene	blue
ENSG00000248780	ARL4AP2	processed_pseudogene	blue
ENSG00000229106	BTBD6P1	processed_pseudogene	blue
ENSG00000218991	CCNG1P1	processed_pseudogene	blue
ENSG00000271461	CKAP2LP1	processed_pseudogene	blue
ENSG00000250816	DCAF13P2	processed_pseudogene	blue
ENSG00000237135	DDX10P1	processed_pseudogene	blue
ENSG00000228432	DHFRP2	processed_pseudogene	blue
ENSG00000229663	DPY19L4P1	processed_pseudogene	blue
ENSG00000213384	EIF4E2P1	processed_pseudogene	blue
ENSG00000231047	GCNT1P3	processed_pseudogene	blue
ENSG00000177590	GIMAP3P	processed_pseudogene	blue
ENSG00000235655	H3P6	processed_pseudogene	blue
ENSG00000240680	H4P1	processed_pseudogene	blue
ENSG00000251453	HAUS1P1	processed_pseudogene	blue
ENSG00000218194	HLFP1	processed_pseudogene	blue
ENSG00000234737	KRT18P15	processed_pseudogene	blue
ENSG00000254285	KRT8P3	processed_pseudogene	blue
ENSG00000231766	MTCO2P5	processed_pseudogene	blue
ENSG00000259651	MTCO3P23	processed_pseudogene	blue
ENSG00000225476	MTCO3P5	processed_pseudogene	blue
ENSG00000224288	MTCYBP11	processed_pseudogene	blue
ENSG00000259671	MTCYBP23	processed_pseudogene	blue
ENSG00000259626	MTND3P12	processed_pseudogene	blue
ENSG00000227557	MTND3P9	processed_pseudogene	blue
ENSG00000236300	MTND4LP12	processed_pseudogene	blue
ENSG00000232772	MTND4P22	processed_pseudogene	blue
ENSG00000224852	MTND5P24	processed_pseudogene	blue
ENSG00000259379	MTND5P32	processed_pseudogene	blue
ENSG00000226839	MTND6P11	processed_pseudogene	blue
ENSG00000257210	NACAP8	processed_pseudogene	blue
ENSG00000229644	NAMPTP1	processed_pseudogene	blue
ENSG00000259078	PTBP1P	processed_pseudogene	blue
ENSG00000249936	RAC1P2	processed_pseudogene	blue
ENSG00000225422	RBMS1P1	processed_pseudogene	blue
ENSG00000235150	RCBTB2P1	processed_pseudogene	blue
ENSG00000203616	RHOT1P2	processed_pseudogene	blue
ENSG00000237169	RPL12P27	processed_pseudogene	blue
ENSG00000243141	RPL23AP66	processed_pseudogene	blue
ENSG00000233460	RPL35AP31	processed_pseudogene	blue
ENSG00000227770	RPL7P12	processed_pseudogene	blue
ENSG00000230283	RPS12P24	processed_pseudogene	blue
ENSG00000243664	RPS29P12	processed_pseudogene	blue
ENSG00000240047	RPS3AP32	processed_pseudogene	blue
ENSG00000270954	RPSAP75	processed_pseudogene	blue
ENSG00000236785	SDR42E1P5	processed_pseudogene	blue
ENSG00000230965	SNX18P13	processed_pseudogene	blue
ENSG00000231123	SPATA20P1	processed_pseudogene	blue
ENSG00000241721	SUMO1P1	processed_pseudogene	blue
ENSG00000241627	UBQLN4P1	processed_pseudogene	blue
ENSG00000237719	Z95152.1	processed_pseudogene	blue
ENSG00000158887	MPZ	polymorphic_pseudogene	blue
ENSG00000222335	AC069257.1	misc_RNA	blue
ENSG00000200998	AC112253.1	misc_RNA	blue
ENSG00000222179	RN7SKP26	misc_RNA	blue
ENSG00000223117	RN7SKP296	misc_RNA	blue
ENSG00000271765	RN7SKP299	misc_RNA	blue
ENSG00000201428	RN7SKP71	misc_RNA	blue
ENSG00000199883	RN7SKP90	misc_RNA	blue
ENSG00000222898	RN7SKP97	misc_RNA	blue
ENSG00000242894	RN7SL634P	misc_RNA	blue
ENSG00000239899	RN7SL674P	misc_RNA	blue
ENSG00000264764	MIR4772	miRNA	blue
ENSG00000207763	MIR617	miRNA	blue
ENSG00000251259	AC004069.1	lncRNA	blue
ENSG00000234477	AC004231.1	lncRNA	blue
ENSG00000214870	AC004540.1	lncRNA	blue
ENSG00000282840	AC004554.2	lncRNA	blue
ENSG00000266088	AC004585.1	lncRNA	blue
ENSG00000243797	AC004917.1	lncRNA	blue
ENSG00000286076	AC005050.3	lncRNA	blue
ENSG00000286658	AC005153.1	lncRNA	blue
ENSG00000284930	AC005280.2	lncRNA	blue
ENSG00000231412	AC005392.2	lncRNA	blue
ENSG00000272396	AC005392.3	lncRNA	blue
ENSG00000261596	AC005632.3	lncRNA	blue
ENSG00000287771	AC007271.1	lncRNA	blue
ENSG00000234389	AC007278.1	lncRNA	blue
ENSG00000236525	AC007278.2	lncRNA	blue
ENSG00000261997	AC007336.1	lncRNA	blue
ENSG00000270120	AC007728.3	lncRNA	blue
ENSG00000287255	AC007877.1	lncRNA	blue
ENSG00000259268	AC007950.1	lncRNA	blue
ENSG00000255649	AC008114.1	lncRNA	blue
ENSG00000274441	AC008957.2	lncRNA	blue
ENSG00000267751	AC009005.1	lncRNA	blue
ENSG00000286894	AC009141.1	lncRNA	blue
ENSG00000223725	AC009226.1	lncRNA	blue
ENSG00000229160	AC009229.2	lncRNA	blue
ENSG00000273006	AC009229.3	lncRNA	blue
ENSG00000285984	AC009301.1	lncRNA	blue
ENSG00000234579	AC009305.1	lncRNA	blue
ENSG00000287950	AC009432.2	lncRNA	blue
ENSG00000249478	AC010307.3	lncRNA	blue
ENSG00000250409	AC010608.1	lncRNA	blue
ENSG00000247199	AC011346.1	lncRNA	blue
ENSG00000254363	AC011379.2	lncRNA	blue
ENSG00000267240	AC011524.2	lncRNA	blue
ENSG00000254291	AC011676.4	lncRNA	blue
ENSG00000257258	AC012150.1	lncRNA	blue
ENSG00000275278	AC012150.2	lncRNA	blue
ENSG00000274213	AC015912.3	lncRNA	blue
ENSG00000287317	AC016769.6	lncRNA	blue
ENSG00000271522	AC016831.5	lncRNA	blue
ENSG00000286236	AC018755.5	lncRNA	blue
ENSG00000259182	AC019254.1	lncRNA	blue
ENSG00000287537	AC020612.4	lncRNA	blue
ENSG00000243273	AC020636.1	lncRNA	blue
ENSG00000249309	AC020703.1	lncRNA	blue
ENSG00000267780	AC021594.2	lncRNA	blue
ENSG00000253736	AC022217.4	lncRNA	blue
ENSG00000254340	AC022784.5	lncRNA	blue
ENSG00000276900	AC023157.3	lncRNA	blue
ENSG00000249409	AC025741.1	lncRNA	blue
ENSG00000256249	AC026333.3	lncRNA	blue
ENSG00000266970	AC061992.2	lncRNA	blue
ENSG00000273972	AC068722.2	lncRNA	blue
ENSG00000228804	AC072022.1	lncRNA	blue
ENSG00000254789	AC073172.1	lncRNA	blue
ENSG00000268170	AC073342.2	lncRNA	blue
ENSG00000243953	AC073359.1	lncRNA	blue
ENSG00000230730	AC074011.1	lncRNA	blue
ENSG00000256072	AC078889.1	lncRNA	blue
ENSG00000253214	AC079209.1	lncRNA	blue
ENSG00000243144	AC079760.2	lncRNA	blue
ENSG00000254554	AC080023.1	lncRNA	blue
ENSG00000251139	AC084871.2	lncRNA	blue
ENSG00000286256	AC084871.4	lncRNA	blue
ENSG00000254695	AC087379.2	lncRNA	blue
ENSG00000267737	AC087645.2	lncRNA	blue
ENSG00000253115	AC087672.1	lncRNA	blue
ENSG00000254288	AC087672.2	lncRNA	blue
ENSG00000260555	AC092681.2	lncRNA	blue
ENSG00000255801	AC092746.1	lncRNA	blue
ENSG00000287131	AC096970.1	lncRNA	blue
ENSG00000251379	AC099550.1	lncRNA	blue
ENSG00000286830	AC105052.5	lncRNA	blue
ENSG00000255029	AC110058.1	lncRNA	blue
ENSG00000241886	AC112496.1	lncRNA	blue
ENSG00000288582	AC114778.2	lncRNA	blue
ENSG00000287737	AC132872.5	lncRNA	blue
ENSG00000287935	AC136297.1	lncRNA	blue
ENSG00000255328	AC136475.5	lncRNA	blue
ENSG00000270030	AC136475.7	lncRNA	blue
ENSG00000270972	AC136475.9	lncRNA	blue
ENSG00000257322	AC138123.1	lncRNA	blue
ENSG00000257746	AC138123.2	lncRNA	blue
ENSG00000282572	AC215522.2	lncRNA	blue
ENSG00000283061	AC215522.3	lncRNA	blue
ENSG00000268355	AC243960.3	lncRNA	blue
ENSG00000275210	AC245884.11	lncRNA	blue
ENSG00000235888	AF064858.1	lncRNA	blue
ENSG00000226772	AL021393.1	lncRNA	blue
ENSG00000272189	AL024508.1	lncRNA	blue
ENSG00000261211	AL031123.2	lncRNA	blue
ENSG00000274536	AL034397.3	lncRNA	blue
ENSG00000274173	AL035661.1	lncRNA	blue
ENSG00000230492	AL049651.1	lncRNA	blue
ENSG00000237927	AL078604.2	lncRNA	blue
ENSG00000284825	AL121935.1	lncRNA	blue
ENSG00000257285	AL132780.1	lncRNA	blue
ENSG00000287913	AL132986.1	lncRNA	blue
ENSG00000287167	AL133313.1	lncRNA	blue
ENSG00000236911	AL137789.1	lncRNA	blue
ENSG00000283384	AL138694.1	lncRNA	blue
ENSG00000284977	AL160272.1	lncRNA	blue
ENSG00000233569	AL161630.1	lncRNA	blue
ENSG00000179253	AL162457.1	lncRNA	blue
ENSG00000283064	AL353759.1	lncRNA	blue
ENSG00000231616	AL354733.2	lncRNA	blue
ENSG00000258711	AL358334.2	lncRNA	blue
ENSG00000272914	AL359532.1	lncRNA	blue
ENSG00000285280	AL390957.1	lncRNA	blue
ENSG00000286865	AL391097.3	lncRNA	blue
ENSG00000238005	AL391832.2	lncRNA	blue
ENSG00000233461	AL445524.1	lncRNA	blue
ENSG00000261055	AL450468.2	lncRNA	blue
ENSG00000273112	AL590385.2	lncRNA	blue
ENSG00000233651	AL590399.5	lncRNA	blue
ENSG00000237372	AL606807.1	lncRNA	blue
ENSG00000238009	AL627309.1	lncRNA	blue
ENSG00000285647	AL671883.3	lncRNA	blue
ENSG00000226012	AP001434.1	lncRNA	blue
ENSG00000286044	AP001977.1	lncRNA	blue
ENSG00000254420	AP003086.1	lncRNA	blue
ENSG00000254632	AP003119.1	lncRNA	blue
ENSG00000215196	BASP1-AS1	lncRNA	blue
ENSG00000278869	BX539320.1	lncRNA	blue
ENSG00000273812	BX640514.2	lncRNA	blue
ENSG00000231233	CFAP58-DT	lncRNA	blue
ENSG00000239265	CLRN1-AS1	lncRNA	blue
ENSG00000259462	CPEB1-AS1	lncRNA	blue
ENSG00000232973	CYP1B1-AS1	lncRNA	blue
ENSG00000225572	DOCK4-AS1	lncRNA	blue
ENSG00000243055	GK-AS1	lncRNA	blue
ENSG00000229331	GK-IT1	lncRNA	blue
ENSG00000232284	GNG12-AS1	lncRNA	blue
ENSG00000280832	GSEC	lncRNA	blue
ENSG00000223534	HLA-DQB1-AS1	lncRNA	blue
ENSG00000259424	IRAIN	lncRNA	blue
ENSG00000267365	KCNJ2-AS1	lncRNA	blue
ENSG00000237803	LINC00211	lncRNA	blue
ENSG00000228705	LINC00659	lncRNA	blue
ENSG00000268658	LINC00664	lncRNA	blue
ENSG00000232677	LINC00665	lncRNA	blue
ENSG00000213373	LINC00671	lncRNA	blue
ENSG00000203721	LINC00862	lncRNA	blue
ENSG00000233058	LINC00884	lncRNA	blue
ENSG00000249173	LINC01093	lncRNA	blue
ENSG00000251442	LINC01094	lncRNA	blue
ENSG00000281162	LINC01127	lncRNA	blue
ENSG00000259687	LINC01220	lncRNA	blue
ENSG00000267659	LINC01482	lncRNA	blue
ENSG00000234506	LINC01506	lncRNA	blue
ENSG00000246016	LINC01513	lncRNA	blue
ENSG00000261453	LINC01735	lncRNA	blue
ENSG00000226125	LINC01907	lncRNA	blue
ENSG00000253315	LINC01932	lncRNA	blue
ENSG00000204277	LINC01993	lncRNA	blue
ENSG00000260923	LINC02193	lncRNA	blue
ENSG00000248455	LINC02217	lncRNA	blue
ENSG00000233431	LINC02596	lncRNA	blue
ENSG00000212743	LINC02656	lncRNA	blue
ENSG00000233321	LINC02669	lncRNA	blue
ENSG00000254946	LINC02751	lncRNA	blue
ENSG00000259293	LIPC-AS1	lncRNA	blue
ENSG00000278090	LUNAR1	lncRNA	blue
ENSG00000238133	MAP3K20-AS1	lncRNA	blue
ENSG00000251230	MIR3945HG	lncRNA	blue
ENSG00000283408	MIR548A1HG	lncRNA	blue
ENSG00000269956	MKNK1-AS1	lncRNA	blue
ENSG00000240666	MME-AS1	lncRNA	blue
ENSG00000227502	MROCKI	lncRNA	blue
ENSG00000177112	MRVI1-AS1	lncRNA	blue
ENSG00000233896	PDYN-AS1	lncRNA	blue
ENSG00000256751	PLBD1-AS1	lncRNA	blue
ENSG00000264630	PRKCA-AS1	lncRNA	blue
ENSG00000265666	RARA-AS1	lncRNA	blue
ENSG00000227354	RBM26-AS1	lncRNA	blue
ENSG00000258545	RHOXF1-AS1	lncRNA	blue
ENSG00000236107	SCN1A-AS1	lncRNA	blue
ENSG00000204044	SLC12A5-AS1	lncRNA	blue
ENSG00000227028	SLC8A1-AS1	lncRNA	blue
ENSG00000226337	TMEM252-DT	lncRNA	blue
ENSG00000180769	WDFY3-AS2	lncRNA	blue
ENSG00000285888	Z85996.2	lncRNA	blue
ENSG00000258732	AC025884.1	unprocessed_pseudogene	brown
ENSG00000258120	KRT128P	unprocessed_pseudogene	brown
ENSG00000227242	NBPF13P	unprocessed_pseudogene	brown
ENSG00000158482	SNX29P1	unprocessed_pseudogene	brown
ENSG00000250771	AC106865.1	transcribed_unprocessed_pseudogene	brown
ENSG00000233836	AC139769.1	transcribed_unprocessed_pseudogene	brown
ENSG00000186481	ANKRD20A5P	transcribed_unprocessed_pseudogene	brown
ENSG00000235505	CASP17P	transcribed_unprocessed_pseudogene	brown
ENSG00000238241	CCR12P	transcribed_unprocessed_pseudogene	brown
ENSG00000248334	WHAMMP2	transcribed_unprocessed_pseudogene	brown
ENSG00000231205	ZNF826P	transcribed_unprocessed_pseudogene	brown
ENSG00000285417	BX571818.1	transcribed_unitary_pseudogene	brown
ENSG00000229052	AL449283.1	transcribed_processed_pseudogene	brown
ENSG00000259513	CYCSP38	transcribed_processed_pseudogene	brown
ENSG00000255569	TRAV1-1	TR_V_gene	brown
ENSG00000211785	TRAV12-1	TR_V_gene	brown
ENSG00000211789	TRAV12-2	TR_V_gene	brown
ENSG00000211794	TRAV12-3	TR_V_gene	brown
ENSG00000211788	TRAV13-1	TR_V_gene	brown
ENSG00000211791	TRAV13-2	TR_V_gene	brown
ENSG00000211792	TRAV14DV4	TR_V_gene	brown
ENSG00000211796	TRAV16	TR_V_gene	brown
ENSG00000211797	TRAV17	TR_V_gene	brown
ENSG00000211799	TRAV19	TR_V_gene	brown
ENSG00000211776	TRAV2	TR_V_gene	brown
ENSG00000211800	TRAV20	TR_V_gene	brown
ENSG00000211801	TRAV21	TR_V_gene	brown
ENSG00000211802	TRAV22	TR_V_gene	brown
ENSG00000211805	TRAV24	TR_V_gene	brown
ENSG00000211806	TRAV25	TR_V_gene	brown
ENSG00000211807	TRAV26-1	TR_V_gene	brown
ENSG00000211809	TRAV27	TR_V_gene	brown
ENSG00000211810	TRAV29DV5	TR_V_gene	brown
ENSG00000211777	TRAV3	TR_V_gene	brown
ENSG00000211778	TRAV4	TR_V_gene	brown
ENSG00000211779	TRAV5	TR_V_gene	brown
ENSG00000211782	TRAV8-1	TR_V_gene	brown
ENSG00000211786	TRAV8-2	TR_V_gene	brown
ENSG00000211787	TRAV8-3	TR_V_gene	brown
ENSG00000211790	TRAV8-4	TR_V_gene	brown
ENSG00000211795	TRAV8-6	TR_V_gene	brown
ENSG00000211793	TRAV9-2	TR_V_gene	brown
ENSG00000229769	TRBV10-2	TR_V_gene	brown
ENSG00000275791	TRBV10-3	TR_V_gene	brown
ENSG00000274752	TRBV12-3	TR_V_gene	brown
ENSG00000276405	TRBV13	TR_V_gene	brown
ENSG00000275743	TRBV14	TR_V_gene	brown
ENSG00000276819	TRBV15	TR_V_gene	brown
ENSG00000276557	TRBV18	TR_V_gene	brown
ENSG00000211746	TRBV19	TR_V_gene	brown
ENSG00000226660	TRBV2	TR_V_gene	brown
ENSG00000211747	TRBV20-1	TR_V_gene	brown
ENSG00000211749	TRBV23-1	TR_V_gene	brown
ENSG00000211750	TRBV24-1	TR_V_gene	brown
ENSG00000211752	TRBV27	TR_V_gene	brown
ENSG00000232869	TRBV29-1	TR_V_gene	brown
ENSG00000237702	TRBV3-1	TR_V_gene	brown
ENSG00000237254	TRBV30	TR_V_gene	brown
ENSG00000211710	TRBV4-1	TR_V_gene	brown
ENSG00000211745	TRBV4-2	TR_V_gene	brown
ENSG00000211734	TRBV5-1	TR_V_gene	brown
ENSG00000230099	TRBV5-4	TR_V_gene	brown
ENSG00000211725	TRBV5-5	TR_V_gene	brown
ENSG00000211728	TRBV5-6	TR_V_gene	brown
ENSG00000211706	TRBV6-1	TR_V_gene	brown
ENSG00000211721	TRBV6-5	TR_V_gene	brown
ENSG00000211724	TRBV6-6	TR_V_gene	brown
ENSG00000282939	TRBV7-2	TR_V_gene	brown
ENSG00000278030	TRBV7-9	TR_V_gene	brown
ENSG00000211716	TRBV9	TR_V_gene	brown
ENSG00000211821	TRDV2	TR_V_gene	brown
ENSG00000248366	TRAJ51	TR_J_pseudogene	brown
ENSG00000211881	TRAJ8	TR_J_pseudogene	brown
ENSG00000211879	TRAJ10	TR_J_gene	brown
ENSG00000211878	TRAJ11	TR_J_gene	brown
ENSG00000211877	TRAJ12	TR_J_gene	brown
ENSG00000211876	TRAJ13	TR_J_gene	brown
ENSG00000211875	TRAJ14	TR_J_gene	brown
ENSG00000211873	TRAJ16	TR_J_gene	brown
ENSG00000211872	TRAJ17	TR_J_gene	brown
ENSG00000211871	TRAJ18	TR_J_gene	brown
ENSG00000211870	TRAJ19	TR_J_gene	brown
ENSG00000211869	TRAJ20	TR_J_gene	brown
ENSG00000211868	TRAJ21	TR_J_gene	brown
ENSG00000211867	TRAJ22	TR_J_gene	brown
ENSG00000211866	TRAJ23	TR_J_gene	brown
ENSG00000211865	TRAJ24	TR_J_gene	brown
ENSG00000211864	TRAJ25	TR_J_gene	brown
ENSG00000211863	TRAJ26	TR_J_gene	brown
ENSG00000211862	TRAJ27	TR_J_gene	brown
ENSG00000211861	TRAJ28	TR_J_gene	brown
ENSG00000211860	TRAJ29	TR_J_gene	brown
ENSG00000211886	TRAJ3	TR_J_gene	brown
ENSG00000211859	TRAJ30	TR_J_gene	brown
ENSG00000211858	TRAJ31	TR_J_gene	brown
ENSG00000211857	TRAJ32	TR_J_gene	brown
ENSG00000211856	TRAJ33	TR_J_gene	brown
ENSG00000211855	TRAJ34	TR_J_gene	brown
ENSG00000211854	TRAJ35	TR_J_gene	brown
ENSG00000276699	TRAJ36	TR_J_gene	brown
ENSG00000278661	TRAJ37	TR_J_gene	brown
ENSG00000211851	TRAJ38	TR_J_gene	brown
ENSG00000211850	TRAJ39	TR_J_gene	brown
ENSG00000211885	TRAJ4	TR_J_gene	brown
ENSG00000211849	TRAJ40	TR_J_gene	brown
ENSG00000211847	TRAJ42	TR_J_gene	brown
ENSG00000211846	TRAJ43	TR_J_gene	brown
ENSG00000211845	TRAJ44	TR_J_gene	brown
ENSG00000211844	TRAJ45	TR_J_gene	brown
ENSG00000211843	TRAJ46	TR_J_gene	brown
ENSG00000211841	TRAJ48	TR_J_gene	brown
ENSG00000211884	TRAJ5	TR_J_gene	brown
ENSG00000211839	TRAJ50	TR_J_gene	brown
ENSG00000211835	TRAJ56	TR_J_gene	brown
ENSG00000211883	TRAJ6	TR_J_gene	brown
ENSG00000211882	TRAJ7	TR_J_gene	brown
ENSG00000211880	TRAJ9	TR_J_gene	brown
ENSG00000282420	TRBJ1-2	TR_J_gene	brown
ENSG00000281958	TRBJ1-4	TR_J_gene	brown
ENSG00000277734	TRAC	TR_C_gene	brown
ENSG00000211751	TRBC1	TR_C_gene	brown
ENSG00000211772	TRBC2	TR_C_gene	brown
ENSG00000278972	AC015920.1	TEC	brown
ENSG00000278962	AC092645.1	TEC	brown
ENSG00000280119	AC093642.2	TEC	brown
ENSG00000279662	AC131649.2	TEC	brown
ENSG00000280014	AC243960.7	TEC	brown
ENSG00000280348	AL138713.1	TEC	brown
ENSG00000200269	RNU6-838P	snRNA	brown
ENSG00000005471	ABCB4	protein_coding	brown
ENSG00000173208	ABCD2	protein_coding	brown
ENSG00000099204	ABLIM1	protein_coding	brown
ENSG00000285476	AC139491.7	protein_coding	brown
ENSG00000164398	ACSL6	protein_coding	brown
ENSG00000123612	ACVR1C	protein_coding	brown
ENSG00000114739	ACVR2B	protein_coding	brown
ENSG00000114948	ADAM23	protein_coding	brown
ENSG00000042980	ADAM28	protein_coding	brown
ENSG00000168594	ADAM29	protein_coding	brown
ENSG00000154734	ADAMTS1	protein_coding	brown
ENSG00000111863	ADTRP	protein_coding	brown
ENSG00000144218	AFF3	protein_coding	brown
ENSG00000116771	AGMAT	protein_coding	brown
ENSG00000135541	AHI1	protein_coding	brown
ENSG00000185567	AHNAK2	protein_coding	brown
ENSG00000154027	AK5	protein_coding	brown
ENSG00000151320	AKAP6	protein_coding	brown
ENSG00000198796	ALPK2	protein_coding	brown
ENSG00000181754	AMIGO1	protein_coding	brown
ENSG00000151150	ANK3	protein_coding	brown
ENSG00000135976	ANKRD36	protein_coding	brown
ENSG00000196912	ANKRD36B	protein_coding	brown
ENSG00000166313	APBB1	protein_coding	brown
ENSG00000165272	AQP3	protein_coding	brown
ENSG00000168646	AXIN2	protein_coding	brown
ENSG00000112182	BACH2	protein_coding	brown
ENSG00000153064	BANK1	protein_coding	brown
ENSG00000127152	BCL11B	protein_coding	brown
ENSG00000171791	BCL2	protein_coding	brown
ENSG00000110987	BCL7A	protein_coding	brown
ENSG00000188848	BEND4	protein_coding	brown
ENSG00000162373	BEND5	protein_coding	brown
ENSG00000133134	BEX2	protein_coding	brown
ENSG00000136573	BLK	protein_coding	brown
ENSG00000095585	BLNK	protein_coding	brown
ENSG00000152785	BMP3	protein_coding	brown
ENSG00000186265	BTLA	protein_coding	brown
ENSG00000179088	C12orf42	protein_coding	brown
ENSG00000227051	C14orf132	protein_coding	brown
ENSG00000265590	C21orf59-TCP10L	protein_coding	brown
ENSG00000164241	C5orf63	protein_coding	brown
ENSG00000131686	CA6	protein_coding	brown
ENSG00000182389	CACNB4	protein_coding	brown
ENSG00000152495	CAMK4	protein_coding	brown
ENSG00000133962	CATSPERB	protein_coding	brown
ENSG00000163492	CCDC141	protein_coding	brown
ENSG00000198865	CCDC152	protein_coding	brown
ENSG00000196553	CCDC196	protein_coding	brown
ENSG00000183813	CCR4	protein_coding	brown
ENSG00000112486	CCR6	protein_coding	brown
ENSG00000126353	CCR7	protein_coding	brown
ENSG00000179934	CCR8	protein_coding	brown
ENSG00000184305	CCSER1	protein_coding	brown
ENSG00000177455	CD19	protein_coding	brown
ENSG00000091972	CD200	protein_coding	brown
ENSG00000012124	CD22	protein_coding	brown
ENSG00000139193	CD27	protein_coding	brown
ENSG00000178562	CD28	protein_coding	brown
ENSG00000204345	CD300LD	protein_coding	brown
ENSG00000167286	CD3D	protein_coding	brown
ENSG00000160654	CD3G	protein_coding	brown
ENSG00000102245	CD40LG	protein_coding	brown
ENSG00000137101	CD72	protein_coding	brown
ENSG00000105369	CD79A	protein_coding	brown
ENSG00000007312	CD79B	protein_coding	brown
ENSG00000172116	CD8B	protein_coding	brown
ENSG00000254126	CD8B2	protein_coding	brown
ENSG00000153283	CD96	protein_coding	brown
ENSG00000128536	CDHR3	protein_coding	brown
ENSG00000204116	CHIC1	protein_coding	brown
ENSG00000134121	CHL1	protein_coding	brown
ENSG00000109684	CLNK	protein_coding	brown
ENSG00000149970	CNKSR2	protein_coding	brown
ENSG00000174469	CNTNAP2	protein_coding	brown
ENSG00000154529	CNTNAP3B	protein_coding	brown
ENSG00000082438	COBLL1	protein_coding	brown
ENSG00000082293	COL19A1	protein_coding	brown
ENSG00000169031	COL4A3	protein_coding	brown
ENSG00000081052	COL4A4	protein_coding	brown
ENSG00000124772	CPNE5	protein_coding	brown
ENSG00000117322	CR2	protein_coding	brown
ENSG00000182809	CRIP2	protein_coding	brown
ENSG00000109943	CRTAM	protein_coding	brown
ENSG00000163599	CTLA4	protein_coding	brown
ENSG00000117984	CTSD	protein_coding	brown
ENSG00000160683	CXCR5	protein_coding	brown
ENSG00000165617	DACT1	protein_coding	brown
ENSG00000170959	DCDC1	protein_coding	brown
ENSG00000257093	DENND11	protein_coding	brown
ENSG00000170456	DENND5B	protein_coding	brown
ENSG00000151240	DIP2C	protein_coding	brown
ENSG00000115423	DNAH6	protein_coding	brown
ENSG00000124721	DNAH8	protein_coding	brown
ENSG00000206052	DOK6	protein_coding	brown
ENSG00000197635	DPP4	protein_coding	brown
ENSG00000134765	DSC1	protein_coding	brown
ENSG00000171451	DSEL	protein_coding	brown
ENSG00000135144	DTX1	protein_coding	brown
ENSG00000127334	DYRK2	protein_coding	brown
ENSG00000164330	EBF1	protein_coding	brown
ENSG00000158813	EDA	protein_coding	brown
ENSG00000135960	EDAR	protein_coding	brown
ENSG00000165521	EML5	protein_coding	brown
ENSG00000132464	ENAM	protein_coding	brown
ENSG00000116106	EPHA4	protein_coding	brown
ENSG00000120915	EPHX2	protein_coding	brown
ENSG00000134954	ETS1	protein_coding	brown
ENSG00000131187	F12	protein_coding	brown
ENSG00000165591	FAAH2	protein_coding	brown
ENSG00000170074	FAM153A	protein_coding	brown
ENSG00000182230	FAM153B	protein_coding	brown
ENSG00000154319	FAM167A	protein_coding	brown
ENSG00000198780	FAM169A	protein_coding	brown
ENSG00000111879	FAM184A	protein_coding	brown
ENSG00000196159	FAT4	protein_coding	brown
ENSG00000140092	FBLN5	protein_coding	brown
ENSG00000144152	FBLN7	protein_coding	brown
ENSG00000104921	FCER2	protein_coding	brown
ENSG00000163534	FCRL1	protein_coding	brown
ENSG00000132704	FCRL2	protein_coding	brown
ENSG00000143297	FCRL5	protein_coding	brown
ENSG00000132185	FCRLA	protein_coding	brown
ENSG00000189283	FHIT	protein_coding	brown
ENSG00000122025	FLT3	protein_coding	brown
ENSG00000183090	FREM3	protein_coding	brown
ENSG00000265817	FSBP	protein_coding	brown
ENSG00000188738	FSIP2	protein_coding	brown
ENSG00000104290	FZD3	protein_coding	brown
ENSG00000130222	GADD45G	protein_coding	brown
ENSG00000171766	GATM	protein_coding	brown
ENSG00000176928	GCNT4	protein_coding	brown
ENSG00000174500	GCSAM	protein_coding	brown
ENSG00000143869	GDF7	protein_coding	brown
ENSG00000166105	GLB1L3	protein_coding	brown
ENSG00000186417	GLDN	protein_coding	brown
ENSG00000255151	GLYATL1B	protein_coding	brown
ENSG00000176533	GNG7	protein_coding	brown
ENSG00000155265	GOLGA7B	protein_coding	brown
ENSG00000175265	GOLGA8A	protein_coding	brown
ENSG00000215252	GOLGA8B	protein_coding	brown
ENSG00000143167	GPA33	protein_coding	brown
ENSG00000150625	GPM6A	protein_coding	brown
ENSG00000154165	GPR15	protein_coding	brown
ENSG00000169508	GPR183	protein_coding	brown
ENSG00000135898	GPR55	protein_coding	brown
ENSG00000198932	GPRASP1	protein_coding	brown
ENSG00000185477	GPRIN3	protein_coding	brown
ENSG00000134202	GSTM3	protein_coding	brown
ENSG00000140511	HAPLN3	protein_coding	brown
ENSG00000181333	HEPHL1	protein_coding	brown
ENSG00000156510	HKDC1	protein_coding	brown
ENSG00000204252	HLA-DOA	protein_coding	brown
ENSG00000241106	HLA-DOB	protein_coding	brown
ENSG00000134709	HOOK1	protein_coding	brown
ENSG00000116983	HPCAL4	protein_coding	brown
ENSG00000002587	HS3ST1	protein_coding	brown
ENSG00000165868	HSPA12A	protein_coding	brown
ENSG00000163600	ICOS	protein_coding	brown
ENSG00000117318	ID3	protein_coding	brown
ENSG00000146674	IGFBP3	protein_coding	brown
ENSG00000254709	IGLL5	protein_coding	brown
ENSG00000030419	IKZF2	protein_coding	brown
ENSG00000134460	IL2RA	protein_coding	brown
ENSG00000168685	IL7R	protein_coding	brown
ENSG00000109452	INPP4B	protein_coding	brown
ENSG00000101230	ISM1	protein_coding	brown
ENSG00000113263	ITK	protein_coding	brown
ENSG00000078596	ITM2A	protein_coding	brown
ENSG00000107104	KANK1	protein_coding	brown
ENSG00000026559	KCNG1	protein_coding	brown
ENSG00000183960	KCNH8	protein_coding	brown
ENSG00000156113	KCNMA1	protein_coding	brown
ENSG00000112232	KHDRBS2	protein_coding	brown
ENSG00000164659	KIAA1324L	protein_coding	brown
ENSG00000168280	KIF5C	protein_coding	brown
ENSG00000118922	KLF12	protein_coding	brown
ENSG00000102349	KLF8	protein_coding	brown
ENSG00000197705	KLHL14	protein_coding	brown
ENSG00000186231	KLHL32	protein_coding	brown
ENSG00000111796	KLRB1	protein_coding	brown
ENSG00000170486	KRT72	protein_coding	brown
ENSG00000186049	KRT73	protein_coding	brown
ENSG00000058085	LAMC2	protein_coding	brown
ENSG00000133424	LARGE1	protein_coding	brown
ENSG00000122188	LAX1	protein_coding	brown
ENSG00000182866	LCK	protein_coding	brown
ENSG00000138795	LEF1	protein_coding	brown
ENSG00000145721	LIX1	protein_coding	brown
ENSG00000173114	LRRN3	protein_coding	brown
ENSG00000172264	MACROD2	protein_coding	brown
ENSG00000172005	MAL	protein_coding	brown
ENSG00000164114	MAP9	protein_coding	brown
ENSG00000153208	MERTK	protein_coding	brown
ENSG00000155970	MICU3	protein_coding	brown
ENSG00000080561	MID2	protein_coding	brown
ENSG00000179455	MKRN3	protein_coding	brown
ENSG00000079931	MOXD1	protein_coding	brown
ENSG00000156738	MS4A1	protein_coding	brown
ENSG00000129422	MTUS1	protein_coding	brown
ENSG00000104177	MYEF2	protein_coding	brown
ENSG00000145911	N4BP3	protein_coding	brown
ENSG00000186462	NAP1L2	protein_coding	brown
ENSG00000186310	NAP1L3	protein_coding	brown
ENSG00000172915	NBEA	protein_coding	brown
ENSG00000142794	NBPF3	protein_coding	brown
ENSG00000177707	NECTIN3	protein_coding	brown
ENSG00000277586	NEFL	protein_coding	brown
ENSG00000184613	NELL2	protein_coding	brown
ENSG00000166342	NETO1	protein_coding	brown
ENSG00000050030	NEXMIF	protein_coding	brown
ENSG00000167483	NIBAN3	protein_coding	brown
ENSG00000183691	NOG	protein_coding	brown
ENSG00000151623	NR3C2	protein_coding	brown
ENSG00000091129	NRCAM	protein_coding	brown
ENSG00000162631	NTNG1	protein_coding	brown
ENSG00000255582	OR10G2	protein_coding	brown
ENSG00000196539	OR2T3	protein_coding	brown
ENSG00000144645	OSBPL10	protein_coding	brown
ENSG00000170909	OSCAR	protein_coding	brown
ENSG00000085465	OVGP1	protein_coding	brown
ENSG00000154814	OXNAD1	protein_coding	brown
ENSG00000083454	P2RX5	protein_coding	brown
ENSG00000078589	P2RY10	protein_coding	brown
ENSG00000124374	PAIP2B	protein_coding	brown
ENSG00000169116	PARM1	protein_coding	brown
ENSG00000132849	PATJ	protein_coding	brown
ENSG00000196092	PAX5	protein_coding	brown
ENSG00000184226	PCDH9	protein_coding	brown
ENSG00000242265	PEG10	protein_coding	brown
ENSG00000164530	PI16	protein_coding	brown
ENSG00000107593	PKD2L1	protein_coding	brown
ENSG00000107679	PLEKHA1	protein_coding	brown
ENSG00000187510	PLEKHG7	protein_coding	brown
ENSG00000124225	PMEPA1	protein_coding	brown
ENSG00000110777	POU2AF1	protein_coding	brown
ENSG00000212993	POU5F1B	protein_coding	brown
ENSG00000132170	PPARG	protein_coding	brown
ENSG00000270339	PPIAL4H	protein_coding	brown
ENSG00000158528	PPP1R9A	protein_coding	brown
ENSG00000138669	PRKG2	protein_coding	brown
ENSG00000185345	PRKN	protein_coding	brown
ENSG00000163629	PTPN13	protein_coding	brown
ENSG00000127329	PTPRB	protein_coding	brown
ENSG00000144724	PTPRG	protein_coding	brown
ENSG00000152894	PTPRK	protein_coding	brown
ENSG00000173482	PTPRM	protein_coding	brown
ENSG00000139832	RAB20	protein_coding	brown
ENSG00000137502	RAB30	protein_coding	brown
ENSG00000147231	RADX	protein_coding	brown
ENSG00000136237	RAPGEF5	protein_coding	brown
ENSG00000113319	RASGRF2	protein_coding	brown
ENSG00000172575	RASGRP1	protein_coding	brown
ENSG00000169435	RASSF6	protein_coding	brown
ENSG00000117602	RCAN3	protein_coding	brown
ENSG00000174136	RGMB	protein_coding	brown
ENSG00000166405	RIC3	protein_coding	brown
ENSG00000176406	RIMS2	protein_coding	brown
ENSG00000129538	RNASE1	protein_coding	brown
ENSG00000114547	ROPN1B	protein_coding	brown
ENSG00000160307	S100B	protein_coding	brown
ENSG00000170989	S1PR1	protein_coding	brown
ENSG00000177570	SAMD12	protein_coding	brown
ENSG00000123453	SARDH	protein_coding	brown
ENSG00000153253	SCN3A	protein_coding	brown
ENSG00000184860	SDR42E1	protein_coding	brown
ENSG00000075213	SEMA3A	protein_coding	brown
ENSG00000112902	SEMA5A	protein_coding	brown
ENSG00000127990	SGCE	protein_coding	brown
ENSG00000161640	SIGLEC11	protein_coding	brown
ENSG00000105492	SIGLEC6	protein_coding	brown
ENSG00000137078	SIT1	protein_coding	brown
ENSG00000117090	SLAMF1	protein_coding	brown
ENSG00000112394	SLC16A10	protein_coding	brown
ENSG00000169507	SLC38A11	protein_coding	brown
ENSG00000165300	SLITRK5	protein_coding	brown
ENSG00000082014	SMARCD3	protein_coding	brown
ENSG00000172554	SNTG2	protein_coding	brown
ENSG00000156395	SORCS3	protein_coding	brown
ENSG00000134532	SOX5	protein_coding	brown
ENSG00000152582	SPEF2	protein_coding	brown
ENSG00000269404	SPIB	protein_coding	brown
ENSG00000196542	SPTSSB	protein_coding	brown
ENSG00000111728	ST8SIA1	protein_coding	brown
ENSG00000105889	STEAP1B	protein_coding	brown
ENSG00000165209	STRBP	protein_coding	brown
ENSG00000196502	SULT1A1	protein_coding	brown
ENSG00000097096	SYDE2	protein_coding	brown
ENSG00000103528	SYT17	protein_coding	brown
ENSG00000183662	TAFA1	protein_coding	brown
ENSG00000136111	TBC1D4	protein_coding	brown
ENSG00000165929	TC2N	protein_coding	brown
ENSG00000204219	TCEA3	protein_coding	brown
ENSG00000100721	TCL1A	protein_coding	brown
ENSG00000185339	TCN2	protein_coding	brown
ENSG00000135426	TESPA1	protein_coding	brown
ENSG00000159445	THEM4	protein_coding	brown
ENSG00000196407	THEM5	protein_coding	brown
ENSG00000172673	THEMIS	protein_coding	brown
ENSG00000185875	THNSL1	protein_coding	brown
ENSG00000145850	TIMD4	protein_coding	brown
ENSG00000100234	TIMP3	protein_coding	brown
ENSG00000164112	TMEM155	protein_coding	brown
ENSG00000121895	TMEM156	protein_coding	brown
ENSG00000131634	TMEM204	protein_coding	brown
ENSG00000151135	TMEM263	protein_coding	brown
ENSG00000167664	TMIGD2	protein_coding	brown
ENSG00000240505	TNFRSF13B	protein_coding	brown
ENSG00000159958	TNFRSF13C	protein_coding	brown
ENSG00000215788	TNFRSF25	protein_coding	brown
ENSG00000076554	TPD52	protein_coding	brown
ENSG00000186854	TRABD2A	protein_coding	brown
ENSG00000082512	TRAF5	protein_coding	brown
ENSG00000163519	TRAT1	protein_coding	brown
ENSG00000071575	TRIB2	protein_coding	brown
ENSG00000109654	TRIM2	protein_coding	brown
ENSG00000144935	TRPC1	protein_coding	brown
ENSG00000204296	TSBP1	protein_coding	brown
ENSG00000182463	TSHZ2	protein_coding	brown
ENSG00000074966	TXK	protein_coding	brown
ENSG00000160185	UBASH3A	protein_coding	brown
ENSG00000174607	UGT8	protein_coding	brown
ENSG00000223443	USP17L2	protein_coding	brown
ENSG00000226430	USP17L7	protein_coding	brown
ENSG00000136014	USP44	protein_coding	brown
ENSG00000128218	VPREB3	protein_coding	brown
ENSG00000101842	VSIG1	protein_coding	brown
ENSG00000002745	WNT16	protein_coding	brown
ENSG00000154764	WNT7A	protein_coding	brown
ENSG00000182489	XKRX	protein_coding	brown
ENSG00000157077	ZFYVE9	protein_coding	brown
ENSG00000171649	ZIK1	protein_coding	brown
ENSG00000176293	ZNF135	protein_coding	brown
ENSG00000179909	ZNF154	protein_coding	brown
ENSG00000278318	ZNF229	protein_coding	brown
ENSG00000196793	ZNF239	protein_coding	brown
ENSG00000197134	ZNF257	protein_coding	brown
ENSG00000138311	ZNF365	protein_coding	brown
ENSG00000124613	ZNF391	protein_coding	brown
ENSG00000170954	ZNF415	protein_coding	brown
ENSG00000173258	ZNF483	protein_coding	brown
ENSG00000171817	ZNF540	protein_coding	brown
ENSG00000182983	ZNF662	protein_coding	brown
ENSG00000198046	ZNF667	protein_coding	brown
ENSG00000196172	ZNF681	protein_coding	brown
ENSG00000147180	ZNF711	protein_coding	brown
ENSG00000214652	ZNF727	protein_coding	brown
ENSG00000196381	ZNF781	protein_coding	brown
ENSG00000188227	ZNF793	protein_coding	brown
ENSG00000174255	ZNF80	protein_coding	brown
ENSG00000127903	ZNF835	protein_coding	brown
ENSG00000197385	ZNF860	protein_coding	brown
ENSG00000187987	ZSCAN23	protein_coding	brown
ENSG00000162415	ZSWIM5	protein_coding	brown
ENSG00000263366	ABHD17AP5	processed_pseudogene	brown
ENSG00000235833	AC017099.1	processed_pseudogene	brown
ENSG00000240787	AC092916.2	processed_pseudogene	brown
ENSG00000240487	AC093010.1	processed_pseudogene	brown
ENSG00000254923	AC130366.1	processed_pseudogene	brown
ENSG00000225544	AC245452.2	processed_pseudogene	brown
ENSG00000270268	AL009028.1	processed_pseudogene	brown
ENSG00000213172	AL031985.1	processed_pseudogene	brown
ENSG00000218730	AL117342.1	processed_pseudogene	brown
ENSG00000232208	AL139415.1	processed_pseudogene	brown
ENSG00000237088	AL163193.1	processed_pseudogene	brown
ENSG00000237971	AL445523.1	processed_pseudogene	brown
ENSG00000122872	ARL4AP1	processed_pseudogene	brown
ENSG00000225569	CCT4P2	processed_pseudogene	brown
ENSG00000214552	COPS8P2	processed_pseudogene	brown
ENSG00000228168	HNRNPA1P21	processed_pseudogene	brown
ENSG00000236946	HNRNPA1P70	processed_pseudogene	brown
ENSG00000256356	HSPA8P5	processed_pseudogene	brown
ENSG00000274493	MRPS17P5	processed_pseudogene	brown
ENSG00000231831	MTHFD1P1	processed_pseudogene	brown
ENSG00000251149	MTND5P5	processed_pseudogene	brown
ENSG00000236521	NPAP1P4	processed_pseudogene	brown
ENSG00000229417	NPM1P25	processed_pseudogene	brown
ENSG00000227212	PFN1P6	processed_pseudogene	brown
ENSG00000236570	RAD23BP1	processed_pseudogene	brown
ENSG00000240954	RPL4P1	processed_pseudogene	brown
ENSG00000242134	RPL5P13	processed_pseudogene	brown
ENSG00000255987	TOMM20P2	processed_pseudogene	brown
ENSG00000215105	TTC3P1	processed_pseudogene	brown
ENSG00000204789	ZNF204P	processed_pseudogene	brown
ENSG00000222078	RN7SKP110	misc_RNA	brown
ENSG00000199218	RN7SKP184	misc_RNA	brown
ENSG00000264781	MIR4537	miRNA	brown
ENSG00000263413	MIR4538	miRNA	brown
ENSG00000265612	MIR4539	miRNA	brown
ENSG00000232759	AC002480.1	lncRNA	brown
ENSG00000232949	AC002480.2	lncRNA	brown
ENSG00000270157	AC004918.5	lncRNA	brown
ENSG00000287778	AC006230.1	lncRNA	brown
ENSG00000287554	AC006364.1	lncRNA	brown
ENSG00000236213	AC006369.1	lncRNA	brown
ENSG00000228590	AC007381.1	lncRNA	brown
ENSG00000271109	AC008555.4	lncRNA	brown
ENSG00000286797	AC009315.1	lncRNA	brown
ENSG00000286457	AC009560.3	lncRNA	brown
ENSG00000287508	AC009560.4	lncRNA	brown
ENSG00000248268	AC010275.1	lncRNA	brown
ENSG00000249318	AC010468.2	lncRNA	brown
ENSG00000253980	AC010609.1	lncRNA	brown
ENSG00000228577	AC010731.3	lncRNA	brown
ENSG00000286122	AC016074.2	lncRNA	brown
ENSG00000236283	AC019197.1	lncRNA	brown
ENSG00000285535	AC021683.5	lncRNA	brown
ENSG00000269954	AC022239.1	lncRNA	brown
ENSG00000259591	AC022898.1	lncRNA	brown
ENSG00000225885	AC023590.1	lncRNA	brown
ENSG00000258168	AC025569.1	lncRNA	brown
ENSG00000285095	AC025887.2	lncRNA	brown
ENSG00000240535	AC034238.2	lncRNA	brown
ENSG00000223808	AC044784.1	lncRNA	brown
ENSG00000287069	AC061958.1	lncRNA	brown
ENSG00000237471	AC073115.2	lncRNA	brown
ENSG00000287733	AC083862.3	lncRNA	brown
ENSG00000235300	AC090627.1	lncRNA	brown
ENSG00000259363	AC090825.1	lncRNA	brown
ENSG00000271964	AC090948.1	lncRNA	brown
ENSG00000272498	AC090948.2	lncRNA	brown
ENSG00000272529	AC090948.3	lncRNA	brown
ENSG00000230393	AC092667.1	lncRNA	brown
ENSG00000287649	AC093418.1	lncRNA	brown
ENSG00000287647	AC093575.1	lncRNA	brown
ENSG00000233850	AC103563.7	lncRNA	brown
ENSG00000253924	AC103831.1	lncRNA	brown
ENSG00000259692	AC104041.1	lncRNA	brown
ENSG00000224099	AC104823.1	lncRNA	brown
ENSG00000224610	AC108879.1	lncRNA	brown
ENSG00000286010	AC108925.1	lncRNA	brown
ENSG00000249717	AC110760.2	lncRNA	brown
ENSG00000285782	AC116099.1	lncRNA	brown
ENSG00000259326	AC116158.1	lncRNA	brown
ENSG00000253535	AC120193.1	lncRNA	brown
ENSG00000285732	AC121334.3	lncRNA	brown
ENSG00000253456	AC136424.1	lncRNA	brown
ENSG00000253811	AC136424.2	lncRNA	brown
ENSG00000250801	AC138965.1	lncRNA	brown
ENSG00000249806	AC139720.1	lncRNA	brown
ENSG00000249186	AC140125.3	lncRNA	brown
ENSG00000229151	AC233976.1	lncRNA	brown
ENSG00000287767	AC233976.2	lncRNA	brown
ENSG00000268027	AC243960.1	lncRNA	brown
ENSG00000286831	AC244472.1	lncRNA	brown
ENSG00000244620	AC246787.2	lncRNA	brown
ENSG00000287979	AC253572.2	lncRNA	brown
ENSG00000228939	AKT3-IT1	lncRNA	brown
ENSG00000227486	AL050309.1	lncRNA	brown
ENSG00000286546	AL079338.1	lncRNA	brown
ENSG00000226455	AL121787.1	lncRNA	brown
ENSG00000260711	AL121839.2	lncRNA	brown
ENSG00000260271	AL132996.1	lncRNA	brown
ENSG00000258927	AL133467.2	lncRNA	brown
ENSG00000227240	AL136456.1	lncRNA	brown
ENSG00000276476	AL136962.1	lncRNA	brown
ENSG00000286285	AL138778.1	lncRNA	brown
ENSG00000257275	AL139020.1	lncRNA	brown
ENSG00000226530	AL158055.1	lncRNA	brown
ENSG00000287789	AL158136.1	lncRNA	brown
ENSG00000279463	AL159972.1	lncRNA	brown
ENSG00000250850	AL161781.2	lncRNA	brown
ENSG00000259097	AL163932.1	lncRNA	brown
ENSG00000286330	AL353660.1	lncRNA	brown
ENSG00000231703	AL354993.1	lncRNA	brown
ENSG00000258760	AL355076.2	lncRNA	brown
ENSG00000287679	AL355347.1	lncRNA	brown
ENSG00000177596	AL355390.1	lncRNA	brown
ENSG00000247287	AL359220.1	lncRNA	brown
ENSG00000259834	AL365361.1	lncRNA	brown
ENSG00000223492	AL391097.1	lncRNA	brown
ENSG00000227705	AL391097.2	lncRNA	brown
ENSG00000272320	AL445309.1	lncRNA	brown
ENSG00000285797	AL512658.2	lncRNA	brown
ENSG00000287092	AL589693.1	lncRNA	brown
ENSG00000227945	AL590006.1	lncRNA	brown
ENSG00000232682	AL592430.2	lncRNA	brown
ENSG00000255240	AP001636.3	lncRNA	brown
ENSG00000251309	AP002075.1	lncRNA	brown
ENSG00000288097	AP002448.1	lncRNA	brown
ENSG00000287426	AP003327.2	lncRNA	brown
ENSG00000245869	AP004609.3	lncRNA	brown
ENSG00000182352	C17orf77	lncRNA	brown
ENSG00000234614	C2CD4D-AS1	lncRNA	brown
ENSG00000254166	CASC19	lncRNA	brown
ENSG00000246228	CASC8	lncRNA	brown
ENSG00000280997	CCAT2	lncRNA	brown
ENSG00000237986	CELF2-AS2	lncRNA	brown
ENSG00000233355	CHRM3-AS2	lncRNA	brown
ENSG00000196167	COLCA1	lncRNA	brown
ENSG00000253364	COPDA1	lncRNA	brown
ENSG00000229153	EPHA1-AS1	lncRNA	brown
ENSG00000204677	FAM153CP	lncRNA	brown
ENSG00000226777	FAM30A	lncRNA	brown
ENSG00000255052	FAM66D	lncRNA	brown
ENSG00000263417	GTSCR1	lncRNA	brown
ENSG00000233387	IATPR	lncRNA	brown
ENSG00000255733	IFNG-AS1	lncRNA	brown
ENSG00000232021	LEF1-AS1	lncRNA	brown
ENSG00000253314	LINC00293	lncRNA	brown
ENSG00000235665	LINC00298	lncRNA	brown
ENSG00000235532	LINC00402	lncRNA	brown
ENSG00000235621	LINC00494	lncRNA	brown
ENSG00000122043	LINC00544	lncRNA	brown
ENSG00000254275	LINC00824	lncRNA	brown
ENSG00000245164	LINC00861	lncRNA	brown
ENSG00000246898	LINC00920	lncRNA	brown
ENSG00000247982	LINC00926	lncRNA	brown
ENSG00000228495	LINC01013	lncRNA	brown
ENSG00000245937	LINC01184	lncRNA	brown
ENSG00000271856	LINC01215	lncRNA	brown
ENSG00000249667	LINC01259	lncRNA	brown
ENSG00000230317	LINC01284	lncRNA	brown
ENSG00000281097	LINC01395	lncRNA	brown
ENSG00000246223	LINC01550	lncRNA	brown
ENSG00000231364	LINC01712	lncRNA	brown
ENSG00000233008	LINC01725	lncRNA	brown
ENSG00000279082	LINC01727	lncRNA	brown
ENSG00000234184	LINC01781	lncRNA	brown
ENSG00000226320	LINC01811	lncRNA	brown
ENSG00000223466	LINC01825	lncRNA	brown
ENSG00000226383	LINC01876	lncRNA	brown
ENSG00000231682	LINC01891	lncRNA	brown
ENSG00000234663	LINC01934	lncRNA	brown
ENSG00000245954	LINC02273	lncRNA	brown
ENSG00000258511	LINC02295	lncRNA	brown
ENSG00000246084	LINC02325	lncRNA	brown
ENSG00000205056	LINC02397	lncRNA	brown
ENSG00000255970	LINC02421	lncRNA	brown
ENSG00000256039	LINC02446	lncRNA	brown
ENSG00000204110	LINC02520	lncRNA	brown
ENSG00000235142	LINC02532	lncRNA	brown
ENSG00000225948	LINC02648	lncRNA	brown
ENSG00000234752	LINC02676	lncRNA	brown
ENSG00000251637	LINC02754	lncRNA	brown
ENSG00000251513	LIX1-AS1	lncRNA	brown
ENSG00000197880	MDS2	lncRNA	brown
ENSG00000253522	MIR3142HG	lncRNA	brown
ENSG00000236901	MIR600HG	lncRNA	brown
ENSG00000227195	MIR663AHG	lncRNA	brown
ENSG00000232490	OSBPL10-AS1	lncRNA	brown
ENSG00000152931	PART1	lncRNA	brown
ENSG00000253438	PCAT1	lncRNA	brown
ENSG00000254266	PKIA-AS1	lncRNA	brown
ENSG00000237943	PRKCQ-AS1	lncRNA	brown
ENSG00000282961	PRNCR1	lncRNA	brown
ENSG00000246763	RGMB-AS1	lncRNA	brown
ENSG00000245534	RORA-AS1	lncRNA	brown
ENSG00000281641	SAMD12-AS1	lncRNA	brown
ENSG00000228956	SATB1-AS1	lncRNA	brown
ENSG00000237914	SIRPG-AS1	lncRNA	brown
ENSG00000256120	SOX5-AS1	lncRNA	brown
ENSG00000187621	TCL6	lncRNA	brown
ENSG00000241657	TRBV11-2	lncRNA	brown
ENSG00000225914	TSBP1-AS1	lncRNA	brown
ENSG00000269553	U62631.1	lncRNA	brown
ENSG00000243836	WDR86-AS1	lncRNA	brown
ENSG00000211968	IGHV1-58	IG_V_gene	brown
ENSG00000242580	IGKV1D-43	IG_V_gene	brown
ENSG00000237111	IGHJ3P	IG_J_pseudogene	brown
ENSG00000242887	IGHJ3	IG_J_gene	brown
ENSG00000240041	IGHJ4	IG_J_gene	brown
ENSG00000242472	IGHJ5	IG_J_gene	brown
ENSG00000211900	IGHJ6	IG_J_gene	brown
ENSG00000211930	IGHD3-3	IG_D_gene	brown
ENSG00000222037	IGLC6	IG_C_pseudogene	brown
ENSG00000211898	IGHD	IG_C_gene	brown
ENSG00000211891	IGHE	IG_C_gene	brown
ENSG00000211899	IGHM	IG_C_gene	brown
ENSG00000279958	AC019278.1	TEC	cyan
ENSG00000281969	AL592158.1	TEC	cyan
ENSG00000181751	C5orf30	protein_coding	cyan
ENSG00000177575	CD163	protein_coding	cyan
ENSG00000177675	CD163L1	protein_coding	cyan
ENSG00000146122	DAAM2	protein_coding	cyan
ENSG00000102780	DGKH	protein_coding	cyan
ENSG00000158560	DYNC1I1	protein_coding	cyan
ENSG00000134463	ECHDC3	protein_coding	cyan
ENSG00000096060	FKBP5	protein_coding	cyan
ENSG00000248905	FMN1	protein_coding	cyan
ENSG00000054598	FOXC1	protein_coding	cyan
ENSG00000180509	KCNE1	protein_coding	cyan
ENSG00000175445	LPL	protein_coding	cyan
ENSG00000124615	MOCS1	protein_coding	cyan
ENSG00000169174	PCSK9	protein_coding	cyan
ENSG00000164105	SAP30	protein_coding	cyan
ENSG00000164106	SCRG1	protein_coding	cyan
ENSG00000121933	TMIGD3	protein_coding	cyan
ENSG00000109906	ZBTB16	protein_coding	cyan
ENSG00000168916	ZNF608	protein_coding	cyan
ENSG00000218749	AL033519.2	processed_pseudogene	cyan
ENSG00000229696	KARS1P1	processed_pseudogene	cyan
ENSG00000237263	MAPK6P3	processed_pseudogene	cyan
ENSG00000284154	MIR3605	miRNA	cyan
ENSG00000265527	MIR5690	miRNA	cyan
ENSG00000250608	AC010210.1	lncRNA	cyan
ENSG00000270112	AC090241.2	lncRNA	cyan
ENSG00000274776	AC090241.3	lncRNA	cyan
ENSG00000288025	AC093849.4	lncRNA	cyan
ENSG00000258831	AC103996.2	lncRNA	cyan
ENSG00000249112	AC112196.1	lncRNA	cyan
ENSG00000251456	AC113398.2	lncRNA	cyan
ENSG00000287458	AL033519.5	lncRNA	cyan
ENSG00000231530	AL157932.1	lncRNA	cyan
ENSG00000256947	AP002518.2	lncRNA	cyan
ENSG00000286463	AP002755.1	lncRNA	cyan
ENSG00000235033	DAAM2-AS1	lncRNA	cyan
ENSG00000234690	EPCAM-DT	lncRNA	cyan
ENSG00000258754	LINC01579	lncRNA	cyan
ENSG00000258785	LINC01580	lncRNA	cyan
ENSG00000259724	LINC01581	lncRNA	cyan
ENSG00000258476	LINC02207	lncRNA	cyan
ENSG00000278338	VWA8-AS1	lncRNA	cyan
ENSG00000265531	FCGR1CP	unprocessed_pseudogene	green
ENSG00000163016	ALMS1P1	transcribed_unprocessed_pseudogene	green
ENSG00000225492	GBP1P1	transcribed_unprocessed_pseudogene	green
ENSG00000234571	H2BP2	transcribed_unprocessed_pseudogene	green
ENSG00000224593	AC092427.1	transcribed_processed_pseudogene	green
ENSG00000258872	FDPSP3	transcribed_processed_pseudogene	green
ENSG00000234515	PPP1R2P1	transcribed_processed_pseudogene	green
ENSG00000279236	AC064801.2	TEC	green
ENSG00000280270	AC068299.2	TEC	green
ENSG00000279320	AC069528.2	TEC	green
ENSG00000279296	PRAL	TEC	green
ENSG00000207171	AC079926.1	snoRNA	green
ENSG00000122729	ACO1	protein_coding	green
ENSG00000102794	ACOD1	protein_coding	green
ENSG00000135298	ADGRB3	protein_coding	green
ENSG00000163568	AIM2	protein_coding	green
ENSG00000165092	ALDH1A1	protein_coding	green
ENSG00000152766	ANKRD22	protein_coding	green
ENSG00000109511	ANXA10	protein_coding	green
ENSG00000100342	APOL1	protein_coding	green
ENSG00000100336	APOL4	protein_coding	green
ENSG00000221963	APOL6	protein_coding	green
ENSG00000162772	ATF3	protein_coding	green
ENSG00000168062	BATF2	protein_coding	green
ENSG00000130303	BST2	protein_coding	green
ENSG00000173372	C1QA	protein_coding	green
ENSG00000173369	C1QB	protein_coding	green
ENSG00000159189	C1QC	protein_coding	green
ENSG00000166278	C2	protein_coding	green
ENSG00000188820	CALHM6	protein_coding	green
ENSG00000204397	CARD16	protein_coding	green
ENSG00000255221	CARD17	protein_coding	green
ENSG00000087589	CASS4	protein_coding	green
ENSG00000269720	CCDC194	protein_coding	green
ENSG00000108691	CCL2	protein_coding	green
ENSG00000108700	CCL8	protein_coding	green
ENSG00000163823	CCR1	protein_coding	green
ENSG00000121797	CCRL2	protein_coding	green
ENSG00000120217	CD274	protein_coding	green
ENSG00000163814	CDCP1	protein_coding	green
ENSG00000170558	CDH2	protein_coding	green
ENSG00000087237	CETP	protein_coding	green
ENSG00000086065	CHMP5	protein_coding	green
ENSG00000160716	CHRNB2	protein_coding	green
ENSG00000134326	CMPK2	protein_coding	green
ENSG00000135047	CTSL	protein_coding	green
ENSG00000169245	CXCL10	protein_coding	green
ENSG00000169248	CXCL11	protein_coding	green
ENSG00000138755	CXCL9	protein_coding	green
ENSG00000008283	CYB561	protein_coding	green
ENSG00000107201	DDX58	protein_coding	green
ENSG00000137628	DDX60	protein_coding	green
ENSG00000181381	DDX60L	protein_coding	green
ENSG00000073737	DHRS9	protein_coding	green
ENSG00000108771	DHX58	protein_coding	green
ENSG00000183690	EFHC2	protein_coding	green
ENSG00000169242	EFNA1	protein_coding	green
ENSG00000055332	EIF2AK2	protein_coding	green
ENSG00000133106	EPSTI1	protein_coding	green
ENSG00000164308	ERAP2	protein_coding	green
ENSG00000178965	ERICH3	protein_coding	green
ENSG00000010030	ETV7	protein_coding	green
ENSG00000179044	EXOC3L1	protein_coding	green
ENSG00000078098	FAP	protein_coding	green
ENSG00000177294	FBXO39	protein_coding	green
ENSG00000116663	FBXO6	protein_coding	green
ENSG00000150337	FCGR1A	protein_coding	green
ENSG00000198019	FCGR1B	protein_coding	green
ENSG00000125531	FNDC11	protein_coding	green
ENSG00000172159	FRMD3	protein_coding	green
ENSG00000143891	GALM	protein_coding	green
ENSG00000117228	GBP1	protein_coding	green
ENSG00000162645	GBP2	protein_coding	green
ENSG00000117226	GBP3	protein_coding	green
ENSG00000162654	GBP4	protein_coding	green
ENSG00000154451	GBP5	protein_coding	green
ENSG00000183347	GBP6	protein_coding	green
ENSG00000213512	GBP7	protein_coding	green
ENSG00000131979	GCH1	protein_coding	green
ENSG00000023171	GRAMD1B	protein_coding	green
ENSG00000178075	GRAMD1C	protein_coding	green
ENSG00000130589	HELZ2	protein_coding	green
ENSG00000138646	HERC5	protein_coding	green
ENSG00000138642	HERC6	protein_coding	green
ENSG00000188290	HES4	protein_coding	green
ENSG00000163666	HESX1	protein_coding	green
ENSG00000135116	HRK	protein_coding	green
ENSG00000166033	HTRA1	protein_coding	green
ENSG00000165949	IFI27	protein_coding	green
ENSG00000068079	IFI35	protein_coding	green
ENSG00000137965	IFI44	protein_coding	green
ENSG00000137959	IFI44L	protein_coding	green
ENSG00000126709	IFI6	protein_coding	green
ENSG00000115267	IFIH1	protein_coding	green
ENSG00000185745	IFIT1	protein_coding	green
ENSG00000119922	IFIT2	protein_coding	green
ENSG00000119917	IFIT3	protein_coding	green
ENSG00000152778	IFIT5	protein_coding	green
ENSG00000185885	IFITM1	protein_coding	green
ENSG00000164509	IL31RA	protein_coding	green
ENSG00000185507	IRF7	protein_coding	green
ENSG00000187608	ISG15	protein_coding	green
ENSG00000151364	KCTD14	protein_coding	green
ENSG00000165185	KIAA1958	protein_coding	green
ENSG00000189013	KIR2DL4	protein_coding	green
ENSG00000157404	KIT	protein_coding	green
ENSG00000130487	KLHDC7B	protein_coding	green
ENSG00000078081	LAMP3	protein_coding	green
ENSG00000002549	LAP3	protein_coding	green
ENSG00000108679	LGALS3BP	protein_coding	green
ENSG00000145685	LHFPL2	protein_coding	green
ENSG00000128342	LIF	protein_coding	green
ENSG00000173239	LIPM	protein_coding	green
ENSG00000160932	LY6E	protein_coding	green
ENSG00000162591	MEGF6	protein_coding	green
ENSG00000155363	MOV10	protein_coding	green
ENSG00000125148	MT2A	protein_coding	green
ENSG00000157601	MX1	protein_coding	green
ENSG00000041515	MYO16	protein_coding	green
ENSG00000138119	MYOF	protein_coding	green
ENSG00000144035	NAT8	protein_coding	green
ENSG00000163121	NEURL3	protein_coding	green
ENSG00000124785	NRN1	protein_coding	green
ENSG00000179915	NRXN1	protein_coding	green
ENSG00000089127	OAS1	protein_coding	green
ENSG00000111335	OAS2	protein_coding	green
ENSG00000111331	OAS3	protein_coding	green
ENSG00000135114	OASL	protein_coding	green
ENSG00000115155	OTOF	protein_coding	green
ENSG00000174944	P2RY14	protein_coding	green
ENSG00000178685	PARP10	protein_coding	green
ENSG00000059378	PARP12	protein_coding	green
ENSG00000173193	PARP14	protein_coding	green
ENSG00000138496	PARP9	protein_coding	green
ENSG00000135903	PAX3	protein_coding	green
ENSG00000197646	PDCD1LG2	protein_coding	green
ENSG00000105499	PLA2G4C	protein_coding	green
ENSG00000133321	PLAAT4	protein_coding	green
ENSG00000145287	PLAC8	protein_coding	green
ENSG00000115896	PLCL1	protein_coding	green
ENSG00000188313	PLSCR1	protein_coding	green
ENSG00000163746	PLSCR2	protein_coding	green
ENSG00000140464	PML	protein_coding	green
ENSG00000152229	PSTPIP2	protein_coding	green
ENSG00000060656	PTPRU	protein_coding	green
ENSG00000179165	PXT1	protein_coding	green
ENSG00000129667	RHBDF2	protein_coding	green
ENSG00000175643	RMI2	protein_coding	green
ENSG00000173821	RNF213	protein_coding	green
ENSG00000092200	RPGRIP1	protein_coding	green
ENSG00000134321	RSAD2	protein_coding	green
ENSG00000136514	RTP4	protein_coding	green
ENSG00000145016	RUBCN	protein_coding	green
ENSG00000188282	RUFY4	protein_coding	green
ENSG00000020577	SAMD4A	protein_coding	green
ENSG00000177409	SAMD9L	protein_coding	green
ENSG00000074660	SCARF1	protein_coding	green
ENSG00000284194	SCO2	protein_coding	green
ENSG00000146555	SDK1	protein_coding	green
ENSG00000108387	SEPTIN4	protein_coding	green
ENSG00000149131	SERPING1	protein_coding	green
ENSG00000088827	SIGLEC1	protein_coding	green
ENSG00000158714	SLAMF8	protein_coding	green
ENSG00000111181	SLC6A12	protein_coding	green
ENSG00000214872	SMTNL1	protein_coding	green
ENSG00000185338	SOCS1	protein_coding	green
ENSG00000196141	SPATS2L	protein_coding	green
ENSG00000115415	STAT1	protein_coding	green
ENSG00000170581	STAT2	protein_coding	green
ENSG00000168394	TAP1	protein_coding	green
ENSG00000145365	TIFA	protein_coding	green
ENSG00000134809	TIMM10	protein_coding	green
ENSG00000101342	TLDC2	protein_coding	green
ENSG00000184012	TMPRSS2	protein_coding	green
ENSG00000123610	TNFAIP6	protein_coding	green
ENSG00000121858	TNFSF10	protein_coding	green
ENSG00000102524	TNFSF13B	protein_coding	green
ENSG00000181634	TNFSF15	protein_coding	green
ENSG00000132274	TRIM22	protein_coding	green
ENSG00000121236	TRIM6	protein_coding	green
ENSG00000156587	UBE2L6	protein_coding	green
ENSG00000184979	USP18	protein_coding	green
ENSG00000168899	VAMP5	protein_coding	green
ENSG00000168658	VWA3B	protein_coding	green
ENSG00000140105	WARS1	protein_coding	green
ENSG00000132530	XAF1	protein_coding	green
ENSG00000124256	ZBP1	protein_coding	green
ENSG00000141664	ZCCHC2	protein_coding	green
ENSG00000178175	ZNF366	protein_coding	green
ENSG00000117010	ZNF684	protein_coding	green
ENSG00000224891	AC007899.1	processed_pseudogene	green
ENSG00000229023	AC067945.1	processed_pseudogene	green
ENSG00000238015	AC104837.2	processed_pseudogene	green
ENSG00000266920	ACTBP9	processed_pseudogene	green
ENSG00000215874	CAPNS1P1	processed_pseudogene	green
ENSG00000263179	HNRNPCP4	processed_pseudogene	green
ENSG00000236878	MTATP6P26	processed_pseudogene	green
ENSG00000227788	MTCO3P43	processed_pseudogene	green
ENSG00000233286	MTND3P10	processed_pseudogene	green
ENSG00000243104	MTND4LP14	processed_pseudogene	green
ENSG00000234065	MTND4P26	processed_pseudogene	green
ENSG00000223549	MTND5P28	processed_pseudogene	green
ENSG00000249934	NCOA4P2	processed_pseudogene	green
ENSG00000239570	SETP11	processed_pseudogene	green
ENSG00000238025	ZDHHC4P1	processed_pseudogene	green
ENSG00000199668	AC009121.1	misc_RNA	green
ENSG00000202046	AC012363.1	misc_RNA	green
ENSG00000242113	RN7SL124P	misc_RNA	green
ENSG00000257452	AC004551.1	lncRNA	green
ENSG00000249502	AC006160.1	lncRNA	green
ENSG00000235321	AC007556.1	lncRNA	green
ENSG00000263080	AC009121.4	lncRNA	green
ENSG00000286020	AC011997.2	lncRNA	green
ENSG00000224789	AC012363.2	lncRNA	green
ENSG00000287299	AC012459.1	lncRNA	green
ENSG00000250616	AC012645.1	lncRNA	green
ENSG00000287543	AC013486.1	lncRNA	green
ENSG00000271947	AC017076.1	lncRNA	green
ENSG00000256948	AC026369.3	lncRNA	green
ENSG00000287188	AC068989.1	lncRNA	green
ENSG00000232518	AC074366.1	lncRNA	green
ENSG00000286273	AC078816.1	lncRNA	green
ENSG00000286216	AC104335.2	lncRNA	green
ENSG00000277511	AC116407.2	lncRNA	green
ENSG00000233785	AC131011.2	lncRNA	green
ENSG00000233030	AC243772.2	lncRNA	green
ENSG00000233029	AC244453.2	lncRNA	green
ENSG00000234998	AC244453.3	lncRNA	green
ENSG00000287756	AL031293.1	lncRNA	green
ENSG00000237529	AL137847.2	lncRNA	green
ENSG00000258521	AL157871.2	lncRNA	green
ENSG00000237626	AL161629.1	lncRNA	green
ENSG00000286162	AL162253.2	lncRNA	green
ENSG00000287839	AL353807.5	lncRNA	green
ENSG00000230910	AL391807.1	lncRNA	green
ENSG00000225886	AL445490.1	lncRNA	green
ENSG00000227466	AL590783.1	lncRNA	green
ENSG00000287393	AL591468.1	lncRNA	green
ENSG00000286548	AL596214.1	lncRNA	green
ENSG00000254602	AP000662.1	lncRNA	green
ENSG00000228318	AP001610.2	lncRNA	green
ENSG00000177335	C8orf31	lncRNA	green
ENSG00000224666	ETV7-AS1	lncRNA	green
ENSG00000231528	FAM225A	lncRNA	green
ENSG00000197301	HMGA2-AS1	lncRNA	green
ENSG00000205837	LINC00487	lncRNA	green
ENSG00000223387	LINC02068	lncRNA	green
ENSG00000223914	LINC02471	lncRNA	green
ENSG00000226004	LINC02528	lncRNA	green
ENSG00000260943	LINC02555	lncRNA	green
[truncated: 3,004 more rows]

## Sheet: S file 1E
Supplementary file 1E – Summary of gene module memberships (MM) and gene significance (GS) with mortalilty within each module. The MM specifies the within-module connectivity, determined by pearson correlation between gene expression and PC1 of given module. The GS specifies log10 P value for association of gene with mortality using cox-regresion, adjusting for Age, HIV status and Dexamethasone t…
			Discovery (n=142)				Validation (n=139)
Gene symbol	Module	Gene type	MM in Discovery	GS in Discovery	HR in Discovery	GS Rank in Discovery	MM in Validation	GS in Validation	HR in Validation	GS Rank in Validation	Hub gene
ASPH	blue	protein_coding	0.773931	4.25201	2.39		0.817029	1.44678	1.7
CLRN1	blue	protein_coding	0.851837	4.25201	1.98	1	0.770705	1.13486	1.37
GK3P	blue	protein_coding	0.810734	4.25201	2.97		0.838666	1.56288	1.92
IL1R2	blue	protein_coding	0.897496	4.25201	1.76	2	0.871245	1.75148	1.44	23
NSUN7	blue	protein_coding	0.668787	4.25201	2.39		0.735868	0.806548	1.38
RNF175	blue	protein_coding	0.851384	4.24304	2.67	3	0.860995	1.29992	1.7	74
OPLAH	blue	protein_coding	0.789099	4.24155	2.35		0.792529	1.47559	1.7
B3GNT5	blue	protein_coding	0.720653	4.20972	3.52		0.746217	1.9747	1.82
AC020636.2	blue	protein_coding	0.868677	4.1902	2.13	4	0.813763	1.01107	1.43
MCEMP1	blue	protein_coding	0.903217	4.16528	1.91	5	0.867912	2.44588	1.71	1	Yes
APBB2	blue	protein_coding	0.491663	4.1619	2.85		0.625837	0.227531	1.2
CYSTM1	blue	protein_coding	0.899948	4.1619	2.09	6	0.864739	2.39765	1.94	2	Yes
FLOT1	blue	protein_coding	0.917899	4.1619	3.08	7	0.923334	1.7517	2	22
NFKBIA	blue	protein_coding	0.838572	4.1552	3.48		0.854323	1.61371	2.12	40
CD177	blue	protein_coding	0.900078	4.08861	1.49	8	0.821417	1.69358	1.28
ETS2	blue	protein_coding	0.932752	4.08861	2.99	9	0.92678	1.83337	2.25	15	Yes
GABRR2	blue	protein_coding	0.566978	4.08861	2.73		0.597734	0.409177	1.31
IL1R1	blue	protein_coding	0.723381	4.08861	2.22		0.734304	0.581594	1.25
IRAK3	blue	protein_coding	0.922061	4.08861	2.42	10	0.865856	1.65753	1.89	34
LRG1	blue	protein_coding	0.926998	4.08861	2.51	11	0.937115	1.27387	1.55	77
MAPK14	blue	protein_coding	0.917174	4.08861	2.91	12	0.931722	1.54301	1.85	47
OLAH	blue	protein_coding	0.710389	4.08861	1.55		0.727584	1.14303	1.24
PGD	blue	protein_coding	0.906168	4.08861	2.82	13	0.881514	1.97055	2.31	11	Yes
UPP1	blue	protein_coding	0.869713	4.08861	2.49	14	0.877769	1.86625	1.88	14	Yes
GYG1	blue	protein_coding	0.833073	4.06137	2.11		0.784164	2.22073	1.95
SAMSN1	blue	protein_coding	0.778885	4.06137	2.1		0.714219	2.48635	2.15
KLHL2	blue	protein_coding	0.932149	4.03047	2.69	15	0.917043	1.46442	1.87	58
KLF14	blue	protein_coding	0.700002	4.02364	1.79		0.716384	1.72747	1.52
CSGALNACT1	blue	protein_coding	0.358077	3.99385	3.04		0.320443	0.167121	1.17
FCAR	blue	protein_coding	0.930279	3.99385	2.57	16	0.91517	2.38771	2.34	3	Yes
PYGL	blue	protein_coding	0.931063	3.99024	2.69	17	0.925189	1.43152	1.86	62
CST7	blue	protein_coding	0.75961	3.98863	2.2		0.750462	1.42272	1.69
DGAT2	blue	protein_coding	0.858551	3.96171	3.02	18	0.852938	0.480289	1.37	100
GADD45A	blue	protein_coding	0.696599	3.96171	2.02		0.717271	2.17495	1.84
KIF1B	blue	protein_coding	0.903334	3.94392	2.9	19	0.90513	2.07374	2.34	6	Yes
NIBAN1	blue	protein_coding	0.899793	3.928	2.96	20	0.908012	0.866464	1.54	95
PLIN5	blue	protein_coding	0.799979	3.928	2.9		0.821686	1.04091	1.55
IL18R1	blue	protein_coding	0.839842	3.87869	1.7		0.805286	1.7238	1.44
NAIP	blue	protein_coding	0.804988	3.85413	2.47		0.790866	1.90447	1.87
PFKFB2	blue	protein_coding	0.773437	3.85413	1.66		0.776004	1.88968	1.53
SYN2	blue	protein_coding	0.730369	3.84806	3.03		0.744685	1.06635	1.74
TAS2R39	blue	protein_coding	0.602832	3.83545	2.12		0.661339	1.21444	1.57
TLR2	blue	protein_coding	0.846506	3.82745	2.83		0.85599	1.3276	1.81	70
ARMC12	blue	protein_coding	0.534795	3.79047	3.17		0.610237	0.640884	1.54
IL4R	blue	protein_coding	0.830818	3.79047	2.67		0.807739	1.15665	1.68
GRB10	blue	protein_coding	0.844486	3.77569	1.84		0.854422	1.64194	1.52	36
SRPK1	blue	protein_coding	0.914189	3.77569	2.8	21	0.925743	1.45775	2.03	60
TLR5	blue	protein_coding	0.945619	3.77569	2.76	22	0.946414	1.78953	1.91	18
CNGB1	blue	protein_coding	0.74396	3.74162	3.02		0.825537	0.559188	1.33
SLC26A8	blue	protein_coding	0.894021	3.73818	2.58	23	0.875821	1.73762	1.84	26
ST6GALNAC3	blue	protein_coding	0.695183	3.73818	2.43		0.756026	2.04657	2.24
WDFY3	blue	protein_coding	0.943545	3.73662	3.16	24	0.945404	1.80283	2.22	16
FPR1	blue	protein_coding	0.91877	3.69579	3.05	25	0.934358	1.59466	2.01	42
NQO2	blue	protein_coding	0.843425	3.64915	3.2		0.798181	1.81688	2.56
ZNF438	blue	protein_coding	0.904252	3.64915	3.03	26	0.880777	1.7432	2	24
MCTP2	blue	protein_coding	0.887873	3.64839	2.75	27	0.90042	1.2825	1.8	76
SULT1B1	blue	protein_coding	0.891415	3.64184	2.73	28	0.888462	1.77329	2.13	20
KCNH7	blue	protein_coding	0.866448	3.62224	2.03	29	0.890214	1.15309	1.41	87
ACBD7	blue	protein_coding	0.309809	3.61199	2.71		0.445351	0.923634	1.66
ROPN1L	blue	protein_coding	0.883632	3.61199	3.32	30	0.925001	1.62998	1.98	38
FCER1G	blue	protein_coding	0.83941	3.60935	2.59		0.819813	2.10088	2.24
NFIL3	blue	protein_coding	0.938025	3.59518	2.91	31	0.942424	2.06581	2.77	7
UPB1	blue	protein_coding	0.55754	3.59372	2.74		0.504969	0.814134	1.5
MINDY4B	blue	protein_coding	0.801913	3.59195	2.13		0.78179	0.697261	1.41
CR1	blue	protein_coding	0.925619	3.58889	2.3	32	0.918169	1.78407	1.8	19
S100A12	blue	protein_coding	0.820466	3.58889	1.74		0.756776	2.17437	1.71
ACSL1	blue	protein_coding	0.961609	3.58329	2.36	33	0.961946	1.66841	1.81	32
MSRB1	blue	protein_coding	0.94681	3.57665	3.47	34	0.924152	1.34405	2.01	68
GPR160	blue	protein_coding	0.780922	3.57623	2.73		0.780156	1.66354	2.11
RD3L	blue	protein_coding	0.755346	3.57623	2.12		0.592436	2.12333	1.95
GLT1D1	blue	protein_coding	0.901402	3.57182	3.98	35	0.928594	1.2894	2.08	75
SLC22A4	blue	protein_coding	0.938448	3.56913	2.58	36	0.947607	1.51527	1.89	50
SLC37A3	blue	protein_coding	0.873384	3.567	2.13	37	0.860369	1.58816	2.01	44
TPST1	blue	protein_coding	0.771261	3.567	2.22		0.733509	0.778759	1.32
CD59	blue	protein_coding	0.77666	3.54552	2.68		0.806515	1.05948	1.51
NECAB1	blue	protein_coding	0.768986	3.53966	1.98		0.754511	1.58522	1.54
MARCHF3	blue	protein_coding	0.66983	3.5312	2.58		0.649444	1.26381	1.66
CA4	blue	protein_coding	0.917174	3.51578	2.24	38	0.898155	1.70739	1.83	30
F5	blue	protein_coding	0.848413	3.51578	2.31		0.791215	1.84529	1.96
CC2D2A	blue	protein_coding	0.81552	3.47518	3.59		0.805541	1.01477	1.64
CKAP4	blue	protein_coding	0.849641	3.46923	2.64		0.845645	1.9736	2.14
KL	blue	protein_coding	0.811606	3.46923	2.02		0.723486	1.75148	1.73
GPR141	blue	protein_coding	0.818567	3.42695	2.66		0.802498	1.63917	2.16
ABHD12B	blue	protein_coding	0.859645	3.42208	2.93	39	0.854323	1.21292	1.68	81
FABP2	blue	protein_coding	0.320798	3.42208	1.68		0.313078	0.0811334	1.07
MGAM	blue	protein_coding	0.894302	3.42208	2.36	40	0.901381	1.4874	1.68	54
PGS1	blue	protein_coding	0.898146	3.40475	2.66	41	0.899048	1.33703	1.74	69
TDRD9	blue	protein_coding	0.801002	3.4006	1.87		0.688842	2.70803	2.01
RGL4	blue	protein_coding	0.806103	3.39164	2.14		0.7517	1.6059	1.71
DDAH2	blue	protein_coding	0.85734	3.39162	2.67	42	0.850194	2.37521	2.87	4
CCDC71L	blue	protein_coding	0.840651	3.39066	2.4		0.83737	1.47986	1.93
ERLIN1	blue	protein_coding	0.781756	3.38618	2.19		0.698123	1.57747	1.7
FPR2	blue	protein_coding	0.920116	3.38618	3.13	43	0.950154	1.46999	1.82	57
LIMK2	blue	protein_coding	0.842864	3.38618	3.12		0.891903	1.21262	1.72	82
MGAM2	blue	protein_coding	0.859717	3.38618	2	44	0.864788	1.44313	1.52	61
RNF144B	blue	protein_coding	0.84286	3.38618	3.17		0.85456	1.49204	2.11	53
RALB	blue	protein_coding	0.922668	3.38326	2.95	45	0.926355	1.59565	2.01	41
ST3GAL4	blue	protein_coding	0.844197	3.37337	2.47		0.862693	1.17233	1.68	85
IFITM2	blue	protein_coding	0.890677	3.36853	2.64	46	0.923308	1.73126	2.13	27
ANXA3	blue	protein_coding	0.860848	3.33828	1.78	47	0.842888	1.85662	1.56
GPR84	blue	protein_coding	0.649612	3.334	1.75		0.586116	2.11038	1.58
CD55	blue	protein_coding	0.826518	3.33075	2.2		0.858278	1.99066	2.16	8
TECPR2	blue	protein_coding	0.861255	3.33075	3.64	48	0.895567	1.13888	1.85	88
HK3	blue	protein_coding	0.868397	3.32581	2.41	49	0.820416	2.22073	2.15
SHROOM4	blue	protein_coding	0.691629	3.28859	2.58		0.660633	0.966306	1.62
CASP5	blue	protein_coding	0.705447	3.28417	2.01		0.769096	0.651029	1.27
REPS2	blue	protein_coding	0.794078	3.28417	3.09		0.837249	0.936608	1.67
SLC9A4	blue	protein_coding	0.700034	3.28417	2.16		0.66064	1.43398	1.64
GUCY2C	blue	protein_coding	0.793471	3.27493	2.54		0.789499	1.75657	2.01
KCNJ15	blue	protein_coding	0.906436	3.26687	2.76	50	0.932758	1.18194	1.6	83
BASP1	blue	protein_coding	0.911662	3.26348	2.26	51	0.928026	1.13038	1.57	89
TAAR1	blue	protein_coding	0.530595	3.26348	2.3		0.521795	0.551983	1.34
ALOX5AP	blue	protein_coding	0.861158	3.2627	2.35	52	0.852598	1.8735	2.12	13
S100A9	blue	protein_coding	0.868552	3.2627	2.08	53	0.835203	2.15375	2.05
APMAP	blue	protein_coding	0.905711	3.26251	2.38	54	0.889883	1.54703	2.28	46
ALDH1A2	blue	protein_coding	0.933662	3.26082	2.59	55	0.934425	1.46209	1.82	59
AQP9	blue	protein_coding	0.964056	3.26039	2.63	56	0.968649	1.48349	1.9	56
GK	blue	protein_coding	0.819439	3.26039	2.69		0.835717	1.01477	1.47
SERPINB1	blue	protein_coding	0.809045	3.23885	2.38		0.766138	2.45149	2.36
MANSC1	blue	protein_coding	0.885392	3.23412	2.2	57	0.880133	1.66181	2.05	33
NAMPT	blue	protein_coding	0.893921	3.23412	2.41	58	0.894477	1.25748	1.66	78
CPD	blue	protein_coding	0.897286	3.20433	2.96	59	0.905729	1.39315	1.91	65
CSNK1A1L	blue	protein_coding	0.879092	3.20433	2.2	60	0.915975	1.4194	1.64	63
CYP19A1	blue	protein_coding	0.632186	3.20433	1.5		0.570145	2.49701	1.68
HLA-DPA1	blue	protein_coding	0.419147	3.20433	0.47		0.437902	1.18204	0.57
MAP2K6	blue	protein_coding	0.825198	3.20433	2.18		0.790871	1.90151	1.95
HSD3B7	blue	protein_coding	0.531525	3.18645	2.12		0.475258	0.391452	1.21
SIPA1L2	blue	protein_coding	0.952778	3.18593	2.16	61	0.933634	1.7432	1.73	25
KIAA0825	blue	protein_coding	0.712551	3.18024	2.55		0.774682	0.685744	1.49
CXCR1	blue	protein_coding	0.857072	3.1728	2.86	62	0.893119	1.05783	1.74	92
ITGA7	blue	protein_coding	0.697618	3.1715	1.63		0.643737	2.02363	1.57
CEBPB	blue	protein_coding	0.898053	3.16895	2.83	63	0.929184	1.7949	2.35	17
FSTL4	blue	protein_coding	0.442228	3.16895	2.07		0.526315	0.382563	1.21
VPS9D1	blue	protein_coding	0.727895	3.16895	3.31		0.761835	0.929907	1.57
SHOC1	blue	protein_coding	0.834129	3.15742	2.06		0.863256	1.5066	1.58	51
S100A11	blue	protein_coding	0.854176	3.1566	2.54	64	0.894995	1.72747	2.31	28
CDS1	blue	protein_coding	0.516466	3.15494	2.22		0.490384	0.662016	1.46
IL18RAP	blue	protein_coding	0.794527	3.1491	1.67		0.763577	2.08634	1.7
CXCL16	blue	protein_coding	0.784602	3.13669	2.79		0.806582	0.943965	1.61
DACH1	blue	protein_coding	0.676448	3.13466	2.2		0.69466	1.34148	1.64
IL1RAP	blue	protein_coding	0.649008	3.13004	2.36		0.727101	1.07522	1.47
IL1RL2	blue	protein_coding	0.40141	3.12126	2.57		0.404611	0.144593	0.85
SLC40A1	blue	protein_coding	0.875224	3.11757	3.01	65	0.868792	1.53192	2.21	49
ANOS1	blue	protein_coding	0.667425	3.10161	1.85		0.527542	0.322418	1.22
LMNB1	blue	protein_coding	0.852248	3.09654	2.26	66	0.815461	1.19754	1.69
PHC2	blue	protein_coding	0.78202	3.09654	2.21		0.830779	1.22886	1.65
CLEC4E	blue	protein_coding	0.82985	3.09232	2.05		0.839765	1.40826	1.68
ATP9A	blue	protein_coding	0.597289	3.07961	1.86		0.612431	1.20687	1.47
QPCT	blue	protein_coding	0.888678	3.07723	2.28	67	0.881568	1.4194	2	64
SIGLEC5	blue	protein_coding	0.795051	3.07645	2.6		0.78743	2.15393	2.55
CCNA1	blue	protein_coding	0.534017	3.07168	1.5		0.357576	1.27747	1.39
PFKFB3	blue	protein_coding	0.829397	3.07148	1.86		0.816323	2.00499	1.76
SLPI	blue	protein_coding	0.570683	3.0695	2		0.508057	0.65559	1.35
FCGR2A	blue	protein_coding	0.940129	3.06213	3.57	68	0.957121	1.05623	1.75	93
BCL6	blue	protein_coding	0.846313	3.05809	2.23		0.90391	1.30476	1.61	72
B4GALT5	blue	protein_coding	0.934596	3.03942	2.46	69	0.925184	1.53823	1.95	48
BMX	blue	protein_coding	0.879155	3.03698	1.8	70	0.871536	1.49333	1.5	52
TRIM9	blue	protein_coding	0.706172	3.03465	2.36		0.686747	0.152217	1.14
SOCS3	blue	protein_coding	0.859683	3.01914	1.78	71	0.850628	1.55602	1.43	45
TXN	blue	protein_coding	0.768302	3.01677	2.27		0.717052	1.51257	1.88
TRIM25	blue	protein_coding	0.882588	3.01464	3.1	72	0.875513	1.72636	2.2	29
SRGN	blue	protein_coding	0.824632	3.01211	2.58		0.813186	1.20063	1.77
DUSP13	blue	protein_coding	0.76925	3.00566	2.06		0.618629	1.33533	1.6
VNN1	blue	protein_coding	0.78464	3.00566	1.59		0.796979	1.66224	1.44
SLC2A3	blue	protein_coding	0.913192	3.00442	2.1	73	0.908526	1.76493	1.9	21
VNN2	blue	protein_coding	0.820458	3.00122	2.25		0.825171	1.47119	1.85
PPP1R3B	blue	protein_coding	0.925971	2.99798	2.52	74	0.936476	1.36468	1.82	67
NLRC4	blue	protein_coding	0.821845	2.99558	2.14		0.816868	1.99066	2.09
DUSP1	blue	protein_coding	0.80508	2.96394	2.26		0.844962	1.44755	1.74
FAM126B	blue	protein_coding	0.847441	2.96394	2.73		0.853675	1.11555	1.73	90
KREMEN1	blue	protein_coding	0.829804	2.96394	1.91		0.874878	0.739003	1.31	99
LRP1B	blue	protein_coding	0.535973	2.96007	0.37		0.254479	0.167281	0.85
PROK2	blue	protein_coding	0.829653	2.94946	1.96		0.799379	0.797545	1.4
AC072022.2	blue	protein_coding	0.897215	2.94388	2.32	75	0.947728	1.22798	1.57	80
STOM	blue	protein_coding	0.549975	2.94308	2.06		0.506037	1.35304	1.77
SLC8A1	blue	protein_coding	0.673125	2.9311	2.48		0.665544	0.243155	1.23
TMEM45B	blue	protein_coding	0.521814	2.92721	2.36		0.466804	0.847561	1.68
LILRA5	blue	protein_coding	0.868648	2.92588	2.11	76	0.851781	2.33823	2.45	5
AP3B2	blue	protein_coding	0.654755	2.91536	1.52		0.630515	2.08634	1.55
NFE4	blue	protein_coding	0.82687	2.91536	2.22		0.797632	0.479783	1.29
DHRS13	blue	protein_coding	0.860588	2.91162	2.23	77	0.841503	0.963425	1.55
TLR8	blue	protein_coding	0.851498	2.90968	2.7	78	0.884204	1.18194	1.78	84
TAS2R40	blue	protein_coding	0.661582	2.8959	1.78		0.75225	1.13877	1.47
TG	blue	protein_coding	0.746546	2.89561	2		0.794995	0.794548	1.45
NFE2	blue	protein_coding	0.810596	2.8951	2.55		0.842057	1.4362	1.98
IGFBP2	blue	protein_coding	0.384846	2.89223	1.63		0.436007	0.477675	1.23
CLEC4D	blue	protein_coding	0.820843	2.88949	1.95		0.765177	1.79891	1.8
TRPM6	blue	protein_coding	0.647651	2.87819	2.6		0.71021	0.252532	1.22
KCNJ2	blue	protein_coding	0.841845	2.86789	2.57		0.886501	0.995423	1.53	94
GCA	blue	protein_coding	0.821472	2.84752	2.15		0.858121	1.3194	1.67	71
KBTBD7	blue	protein_coding	0.752368	2.82954	2.67		0.673091	1.14516	1.81
ELOVL4	blue	protein_coding	0.659717	2.8194	0.32		0.570937	1.3857	0.56
ALPL	blue	protein_coding	0.846883	2.81551	1.82		0.840672	0.80138	1.28
ANKRD34B	blue	protein_coding	0.593551	2.81551	1.77		0.582086	0.414361	1.3
ADAMTS5	blue	protein_coding	0.506954	2.81236	0.56		0.217182	0.70346	0.73
ADM	blue	protein_coding	0.846866	2.81227	2.06		0.86503	0.788916	1.38	97
SORT1	blue	protein_coding	0.729303	2.80135	2.63		0.717315	1.44313	1.83
TNFAIP8L3	blue	protein_coding	0.598468	2.79624	1.67		0.50206	3.00707	1.88
MYO10	blue	protein_coding	0.776714	2.77775	1.77		0.781965	1.53098	1.49
MAK	blue	protein_coding	0.719643	2.77501	2.3		0.683467	0.658056	1.44
NR2E1	blue	protein_coding	0.593253	2.75758	1.81		0.541733	1.0611	1.46
TGFA	blue	protein_coding	0.932564	2.75758	2.15	79	0.941065	1.30255	1.61	73
MXD1	blue	protein_coding	0.88986	2.74606	3.04	80	0.927168	1.5939	2.29	43
MMP9	blue	protein_coding	0.85835	2.7252	1.6	81	0.833929	2.45149	1.71
CREB5	blue	protein_coding	0.928708	2.7177	2.73	82	0.918571	1.25667	1.84	79
CACNA1E	blue	protein_coding	0.811606	2.71654	1.99		0.852607	1.65404	1.62	35
CEBPD	blue	protein_coding	0.873309	2.70923	2.34	83	0.874364	1.94003	2.3	12
CYP1B1	blue	protein_coding	0.69538	2.70103	1.95		0.669293	1.23014	1.6
GALNT14	blue	protein_coding	0.853128	2.69566	1.78	84	0.794142	1.51407	1.58
RBM47	blue	protein_coding	0.844029	2.69311	2.84		0.914241	1.39195	1.93	66
PADI4	blue	protein_coding	0.828086	2.68069	2.03		0.809442	1.57127	1.99
TMEM132D	blue	protein_coding	0.593731	2.6802	2.67		0.6612	0.608111	1.41
MAOA	blue	protein_coding	0.485317	2.66797	1.46		0.414713	1.02124	1.24
GPAT3	blue	protein_coding	0.879621	2.65549	2.57	85	0.810787	1.99045	2.51
FUT7	blue	protein_coding	0.859297	2.64901	2.28	86	0.876961	1.63901	2.09	37
FBXL5	blue	protein_coding	0.805788	2.64737	2.76		0.789106	1.34276	2.04
OSM	blue	protein_coding	0.820948	2.64737	1.82		0.822123	1.67596	1.69
PNPLA1	blue	protein_coding	0.840827	2.64388	1.96		0.743845	1.77698	2.05
C8orf88	blue	protein_coding	0.688557	2.63344	2.05		0.721221	1.40451	1.71
MTARC1	blue	protein_coding	0.852114	2.62515	2.19	87	0.794146	1.39871	1.97
DSC2	blue	protein_coding	0.665237	2.62256	2		0.718191	0.606291	1.28
STEAP4	blue	protein_coding	0.871477	2.61481	2.73	88	0.876545	0.866464	1.57	96
TIFAB	blue	protein_coding	0.690126	2.59092	0.42		0.622741	1.21262	0.57
NBL1	blue	protein_coding	0.498957	2.58042	0.41		0.47646	1.17789	0.52
FAM110C	blue	protein_coding	0.607386	2.57644	0.4		0.465155	1.55578	0.51
MYO7B	blue	protein_coding	0.353156	2.56869	2.77		0.376205	0.0927232	0.91
EPAS1	blue	protein_coding	0.610705	2.5562	1.76		0.726708	0.628047	1.33
LTB4R	blue	protein_coding	0.9061	2.5562	2.5	89	0.871183	1.99066	2.98	9
ADGRG3	blue	protein_coding	0.833991	2.55389	1.98		0.850427	1.487	1.65	55
KLF5	blue	protein_coding	0.697199	2.55378	2.24		0.657849	0.982212	1.65
TLR4	blue	protein_coding	0.854302	2.54445	2.3	90	0.873194	1.62998	2.08	39
BCL2A1	blue	protein_coding	0.758814	2.53543	1.79		0.739953	1.70491	1.68
C5orf47	blue	protein_coding	0.650954	2.53543	2.46		0.693256	0.340337	1.25
CBS	blue	protein_coding	0.680438	2.51719	2.13		0.772729	1.30002	1.64
TRIB1	blue	protein_coding	0.860819	2.5098	2.44	91	0.858519	1.98351	2.29	10
SELL	blue	protein_coding	0.911344	2.49462	2.41	92	0.884544	1.70314	2.23	31
SOD2	blue	protein_coding	0.839155	2.48853	2.7		0.832624	0.556513	1.39
SOD2	blue	protein_coding	0.839155	2.48853	2.7		0.832624	0.556513	1.39
RAB36	blue	protein_coding	0.745259	2.4826	2.04		0.74666	0.631059	1.34
KCNE1B	blue	protein_coding	0.596338	2.47414	1.78		0.600219	2.12333	1.84
VSIG4	blue	protein_coding	0.711533	2.47414	2.44		0.73514	1.2894	1.59
LSMEM1	blue	protein_coding	0.789124	2.46522	2.23		0.79206	1.36911	1.77
ADGRD1	blue	protein_coding	0.500351	2.45251	0.46		0.414625	1.0528	0.62
LRRC17	blue	protein_coding	0.643543	2.43028	2.36		0.681134	0.270873	1.25
FTH1	blue	protein_coding	0.677538	2.41999	2.08		0.673395	0.734581	1.52
LILRA6	blue	protein_coding	0.714404	2.41783	2.13		0.746481	1.99066	2.11
HP	blue	protein_coding	0.708289	2.40977	1.45		0.571326	2.44472	1.6
TNFRSF10C	blue	protein_coding	0.808379	2.40896	2.94		0.857581	0.779899	1.61	98
VNN3	blue	protein_coding	0.735112	2.40602	2.68		0.77507	1.49579	2.06
HDAC9	blue	protein_coding	0.657647	2.40564	0.48		0.588051	1.69328	0.52
MRVI1	blue	protein_coding	0.795901	2.40564	2.13		0.81782	1.4408	1.92
MB21D2	blue	protein_coding	0.557318	2.40176	0.47		0.498566	1.29613	0.51
SEZ6L	blue	protein_coding	0.523942	2.39026	0.47		0.42565	1.21292	0.55
ARHGAP22	blue	protein_coding	0.500682	2.38987	0.43		0.362134	0.258498	0.79
GPR27	blue	protein_coding	0.90587	2.38214	2.15	93	0.8947	1.10239	1.7	91
OLFM1	blue	protein_coding	0.510725	2.38194	0.53		0.458466	1.68745	0.52
PLD4	blue	protein_coding	0.754715	2.37974	0.54		0.678386	1.65142	0.61
TMEM119	blue	protein_coding	0.514999	2.37251	1.88		0.628285	0.244769	1.13
ZDHHC19	blue	protein_coding	0.634448	2.36961	1.55		0.737365	1.51927	1.4
LPCAT2	blue	protein_coding	0.762234	2.36171	2.51		0.805058	1.18949	1.67
LRRN1	blue	protein_coding	0.704747	2.34123	1.88		0.611792	2.13077	2.09
IL1B	blue	protein_coding	0.737321	2.32708	2.34		0.809688	0.88269	1.53
SEMA6B	blue	protein_coding	0.757715	2.32146	1.88		0.753952	2.17051	1.93
CHIT1	blue	protein_coding	0.52225	2.30878	1.84		0.534613	0.760452	1.43
LILRB3	blue	protein_coding	0.769589	2.27569	2.27		0.813191	1.40387	1.77
IL1RN	blue	protein_coding	0.804099	2.25989	2.11		0.732356	1.76148	2.02
NUPR1	blue	protein_coding	0.566702	2.2542	1.8		0.654349	0.963811	1.45
PLA2G7	blue	protein_coding	0.453711	2.24319	0.53		0.387935	0.00479334	1.01
PIGL	blue	protein_coding	0.842751	2.23878	0.45		0.796796	1.85582	0.45
IFITM3	blue	protein_coding	0.780578	2.22392	1.85		0.771098	1.63901	1.91
UBE2D1	blue	protein_coding	0.827889	2.22392	2.36		0.816958	1.678	2.09
IRF2BPL	blue	protein_coding	0.731516	2.22237	2.12		0.779007	0.619511	1.41
RAB19	blue	protein_coding	0.71598	2.2143	1.7		0.562317	0.923538	1.54
BSND	blue	protein_coding	0.592109	2.19847	1.54		0.642629	1.89244	1.56
NDUFB3	blue	protein_coding	0.679105	2.1906	2.2		0.632825	1.30916	1.81
TAGLN2	blue	protein_coding	0.676075	2.1906	2.46		0.644828	0.513506	1.41
TREM1	blue	protein_coding	0.686033	2.18947	2.55		0.707136	0.64116	1.47
ADGB	blue	protein_coding	0.700057	2.18801	1.75		0.681036	1.56423	1.74
SLC7A11	blue	protein_coding	0.558466	2.18782	2.12		0.490138	0.868385	1.65
EDNRB	blue	protein_coding	0.499427	2.18545	2.27		0.377199	1.36252	2.02
CXCR2	blue	protein_coding	0.697526	2.17681	2.16		0.782198	0.779899	1.51
AFF2	blue	protein_coding	0.772699	2.16996	2.28		0.740556	1.2754	1.85
INSL3	blue	protein_coding	0.638786	2.16389	2.13		0.651486	1.10377	1.64
G0S2	blue	protein_coding	0.677131	2.15424	1.42		0.619702	1.94645	1.55
CMTM2	blue	protein_coding	0.754941	2.14789	1.91		0.728263	0.540569	1.38
STX11	blue	protein_coding	0.798772	2.13322	2.39		0.796273	1.0684	1.63
LIMS2	blue	protein_coding	0.563231	2.13162	2.09		0.636807	0.0322768	1.03
MARCKS	blue	protein_coding	0.799397	2.131	2.2		0.771831	2.15021	2.92
CLEC5A	blue	protein_coding	0.682278	2.12347	1.71		0.45422	2.35101	2.05
FOS	blue	protein_coding	0.74549	2.1229	1.71		0.780093	1.84529	1.96
HAL	blue	protein_coding	0.633162	2.12184	2.41		0.685495	0.238543	1.22
CACNA2D3	blue	protein_coding	0.517957	2.12145	0.6		0.392404	1.11296	0.64
FBXL13	blue	protein_coding	0.679319	2.10567	2.16		0.71879	0.26583	1.23
PTGFR	blue	protein_coding	0.642386	2.10247	1.72		0.444099	1.67153	1.67
LRRK2	blue	protein_coding	0.764149	2.10154	2.62		0.759015	0.604072	1.46
S100P	blue	protein_coding	0.615177	2.09719	1.45		0.392962	1.00098	1.33
CNR2	blue	protein_coding	0.7436	2.09656	0.52		0.662626	1.71937	0.56
HSPA1A	blue	protein_coding	0.768349	2.09208	2.08		0.800344	1.82763	2.16
LY96	blue	protein_coding	0.847994	2.09208	2		0.833764	1.44906	1.73
RGS2	blue	protein_coding	0.754844	2.09072	2.28		0.696036	0.885976	1.67
ADCY3	blue	protein_coding	0.272044	2.08671	1.74		0.237558	0.231956	1.16
SCN9A	blue	protein_coding	0.734278	2.0816	1.78		0.677497	1.40101	1.6
SLC1A3	blue	protein_coding	0.592155	2.07573	1.46		0.488275	1.76493	1.43
HSPA1B	blue	protein_coding	0.687333	2.06833	2.08		0.704674	2.28123	2.04
KIAA0319	blue	protein_coding	0.549908	2.04132	2.17		0.510523	0.556513	1.37
CD1C	blue	protein_coding	0.677307	2.03371	0.61		0.567586	1.58874	0.59
HCAR2	blue	protein_coding	0.737862	2.01347	2.17		0.765914	0.693897	1.4
FAM169B	blue	protein_coding	0.613237	1.99941	1.89		0.659909	1.40451	1.82
SGMS2	blue	protein_coding	0.558416	1.99584	1.99		0.442057	1.76958	2.25
C3AR1	blue	protein_coding	0.526957	1.99516	1.83		0.303977	0.444084	1.32
FCGR3B	blue	protein_coding	0.742409	1.98825	2.03		0.812159	0.866464	1.53
LIPF	blue	protein_coding	0.618964	1.97349	1.76		0.661805	0.667147	1.39
PGLYRP1	blue	protein_coding	0.650304	1.96105	1.68		0.554623	1.23766	1.51
TSC22D3	blue	protein_coding	0.702211	1.91647	2.03		0.718642	0.984605	1.54
ADCY4	blue	protein_coding	0.800264	1.91503	2.24		0.828451	1.70314	2.34
CRISPLD2	blue	protein_coding	0.767028	1.91204	2.19		0.792171	0.566591	1.38
MSRB2	blue	protein_coding	0.773856	1.86919	2.35		0.726766	0.909937	1.7
CEACAM4	blue	protein_coding	0.75707	1.86708	2.01		0.845838	1.16322	1.81
RETN	blue	protein_coding	0.376736	1.86473	1.42		0.248697	2.31921	1.6
ERGIC1	blue	protein_coding	0.710577	1.8542	2.25		0.7433	0.39295	1.33
FFAR3	blue	protein_coding	0.615831	1.84493	1.52		0.557049	0.961232	1.38
APOBEC3A	blue	protein_coding	0.847185	1.83184	2.1		0.795491	1.5858	2.25
SLCO4A1	blue	protein_coding	0.356643	1.82984	1.73		0.336011	1.14658	1.63
NWD1	blue	protein_coding	0.469852	1.8187	1.73		0.233284	0.262125	1.25
KRT23	blue	protein_coding	0.577293	1.81373	1.96		0.555494	0.485154	1.32
LIN7A	blue	protein_coding	0.779342	1.79705	1.96		0.811529	1.52229	2.06
H1-6	blue	protein_coding	0.721558	1.79519	1.94		0.768158	1.03305	1.55
BEND7	blue	protein_coding	0.741286	1.78967	1.56		0.712279	1.16717	1.58
TSHZ3	blue	protein_coding	0.624951	1.78626	2.05		0.723022	0.715039	1.51
CYP4F3	blue	protein_coding	0.652026	1.77927	1.99		0.662089	1.07963	1.79
LIPK	blue	protein_coding	0.629251	1.76996	1.71		0.633482	0.922926	1.5
GPR42	blue	protein_coding	0.545702	1.7692	1.75		0.477561	0.857998	1.53
RSPH14	blue	protein_coding	0.609033	1.76167	1.85		0.609134	0.632444	1.37
CEACAM3	blue	protein_coding	0.727442	1.75797	2.41		0.796488	1.24132	1.87
IRS2	blue	protein_coding	0.625152	1.75781	1.68		0.709679	1.62304	1.86
OOSP3	blue	protein_coding	0.610336	1.757	2.04		0.568833	0.58943	1.44
CAPN13	blue	protein_coding	0.653891	1.75198	1.72		0.574117	0.323652	1.19
SLC11A1	blue	protein_coding	0.775193	1.74183	1.87		0.816118	0.959983	1.58
HSPA6	blue	protein_coding	0.83283	1.74065	2.19		0.854046	1.15665	1.76	86
FBLN2	blue	protein_coding	0.570097	1.73564	0.53		0.505106	1.704	0.51
FFAR2	blue	protein_coding	0.73748	1.73184	2.01		0.772412	0.963425	1.58
SLC31A2	blue	protein_coding	0.636925	1.73134	2.11		0.658121	0.660345	1.5
CFAP58	blue	protein_coding	0.638296	1.72701	2.13		0.682403	0.765685	1.61
KIF27	blue	protein_coding	0.541001	1.72676	1.8		0.554055	0.282801	1.22
F2RL1	blue	protein_coding	0.736558	1.71654	2.18		0.833304	0.566591	1.47
PID1	blue	protein_coding	0.573068	1.70889	0.68		0.500022	0.765685	0.75
ARHGAP29	blue	protein_coding	0.522799	1.70717	1.66		0.390576	2.03015	2.21
AIRE	blue	protein_coding	0.578589	1.6963	0.55		0.51093	0.549161	0.69
KAZN	blue	protein_coding	0.592398	1.68257	1.59		0.705822	1.19154	1.49
TMEM272	blue	protein_coding	0.546789	1.66547	1.93		0.648117	0.655722	1.48
METTL7B	blue	protein_coding	0.538769	1.6639	1.45		0.527638	3.00707	1.97
HCAR3	blue	protein_coding	0.700539	1.66092	1.92		0.690804	0.137857	1.11
SHOX2	blue	protein_coding	0.625509	1.65922	2.02		0.674841	1.21142	1.58
OSBPL6	blue	protein_coding	0.487178	1.63809	1.68		0.439461	1.31251	1.93
PLAU	blue	protein_coding	0.63625	1.63343	1.74		0.535877	0.815891	1.4
PRLR	blue	protein_coding	0.393639	1.62774	0.6		0.494262	0.16017	0.87
SLC2A14	blue	protein_coding	0.411481	1.6244	1.36		0.387372	0.21944	1.09
NLRP6	blue	protein_coding	0.603987	1.62401	1.82		0.727731	0.636186	1.4
CA12	blue	protein_coding	0.621795	1.60072	1.61		0.669203	0.589814	1.28
HLA-DQA1	blue	protein_coding	0.551425	1.60072	0.65		0.666053	1.83277	0.6
CD1E	blue	protein_coding	0.481216	1.5988	0.55		0.396077	0.775928	0.62
EFCAB2	blue	protein_coding	0.735343	1.59213	1.69		0.79672	0.88253	1.41
ZDHHC11B	blue	protein_coding	0.42566	1.58058	0.5		0.491411	0.619511	0.69
CENPK	blue	protein_coding	0.602989	1.5775	0.57		0.661187	0.855633	0.64
ACSS3	blue	protein_coding	0.752288	1.54735	1.83		0.821761	1.28114	1.78
DOCK4	blue	protein_coding	0.680204	1.526	1.95		0.64725	0.575182	1.35
LIPJ	blue	protein_coding	0.557754	1.52414	1.76		0.578855	0.18276	1.17
NSG2	blue	protein_coding	0.629256	1.5212	1.63		0.662474	0.766322	1.42
TUFT1	blue	protein_coding	0.681842	1.51685	1.81		0.667103	1.70864	2.04
CHMP4C	blue	protein_coding	0.359323	1.51163	1.67		0.453519	0.629522	1.33
ITGB4	blue	protein_coding	0.529983	1.51163	1.6		0.53918	0.0341724	1.03
CCNJL	blue	protein_coding	0.566492	1.50652	1.68		0.663278	1.2014	1.55
COL9A3	blue	protein_coding	0.610261	1.49161	1.77		0.611046	1.33533	2.01
CAPNS2	blue	protein_coding	0.601367	1.48681	1.93		0.642272	0.765984	1.48
PRRG4	blue	protein_coding	0.591585	1.47309	1.98		0.594383	0.427074	1.27
DDX11	blue	protein_coding	0.50212	1.45949	0.57		0.313325	0.140459	1.12
C5orf67	blue	protein_coding	0.743138	1.44535	1.76		0.709714	0.575264	1.44
SECTM1	blue	protein_coding	0.688272	1.43551	1.96		0.764878	0.83579	1.49
FOLR3	blue	protein_coding	0.693444	1.43458	1.33		0.641418	0.83579	1.24
TMEM140	blue	protein_coding	0.762531	1.41463	1.99		0.762845	0.961029	1.59
MAP3K20	blue	protein_coding	0.627269	1.4037	1.77		0.579762	0.612749	1.35
GGACT	blue	protein_coding	0.529702	1.38966	0.56		0.568667	0.88253	0.61
NCF1	blue	protein_coding	0.702115	1.38944	2.02		0.684182	0.924903	1.77
TDRD6	blue	protein_coding	0.42747	1.37506	0.64		0.346727	0.0110777	1.01
MME	blue	protein_coding	0.518952	1.37475	1.75		0.544292	0.118534	0.9
XCL1	blue	protein_coding	0.552512	1.37475	0.61		0.493538	1.35738	0.57
PLB1	blue	protein_coding	0.491311	1.36075	1.5		0.551115	1.19759	1.58
ABCA1	blue	protein_coding	0.678787	1.34609	1.82		0.716542	1.29541	1.91
HORMAD1	blue	protein_coding	0.718272	1.32018	1.64		0.73905	0.845084	1.46
CBSL	blue	protein_coding	0.574485	1.318	1.81		0.658532	0.280139	1.22
SPRED1	blue	protein_coding	0.377499	1.31588	0.62		0.434434	0.676342	0.69
WLS	blue	protein_coding	0.369741	1.30125	1.73		0.366991	0.0989587	0.92
B3GALNT1	blue	protein_coding	0.566211	1.28624	1.71		0.329903	0.844911	1.74
SMPDL3A	blue	protein_coding	0.580587	1.27767	1.62		0.320904	0.866926	1.49
DNAH7	blue	protein_coding	0.279454	1.25791	1.91		0.413848	0.85133	1.59
EPB41L4B	blue	protein_coding	0.264669	1.24732	1.38		0.276655	0.87653	1.4
SH3RF2	blue	protein_coding	0.478146	1.23958	0.53		0.256614	1.64568	0.47
CPE	blue	protein_coding	0.403483	1.22559	1.7		0.51678	2.07374	2.45
TTC26	blue	protein_coding	0.529031	1.22543	1.5		0.444917	0.546613	1.3
NECTIN2	blue	protein_coding	0.54593	1.21037	1.42		0.547862	1.16586	1.44
HLA-G	blue	protein_coding	0.488306	1.18662	1.72		0.587359	0.632728	1.47
HECW2	blue	protein_coding	0.597084	1.18117	1.58		0.670437	1.14125	1.55
MAB21L3	blue	protein_coding	0.713712	1.17492	1.44		0.759426	1.78407	1.71
LIPN	blue	protein_coding	0.689139	1.17371	1.49		0.638433	1.40451	1.76
FLT1	blue	protein_coding	0.335549	1.16215	1.52		0.407856	0.201111	1.21
PTPRN2	blue	protein_coding	0.405018	1.14753	1.56		0.519541	0.914317	1.7
ORM1	blue	protein_coding	0.630517	1.13893	1.4		0.567671	0.568003	1.29
GJB6	blue	protein_coding	0.487608	1.1309	1.37		0.261219	1.69351	1.88
FGF13	blue	protein_coding	0.591333	1.12322	1.54		0.696796	0.894202	1.43
PGM5	blue	protein_coding	0.528306	1.10797	1.46		0.504075	0.485244	1.31
NOD2	blue	protein_coding	0.580638	1.06893	1.82		0.725309	0.696046	1.51
PRDM5	blue	protein_coding	0.496994	1.06893	1.44		0.52766	0.715039	1.32
ZNF844	blue	protein_coding	0.381715	1.06253	1.7		0.43001	0.313154	1.29
LINGO2	blue	protein_coding	0.545644	1.04323	0.66		0.235642	0.199873	0.84
INSC	blue	protein_coding	0.628832	1.02293	1.55		0.602547	1.31507	1.67
ARPIN	blue	protein_coding	0.416795	1.01089	0.74		0.230529	0.225586	0.88
INHBB	blue	protein_coding	0.533562	1.00109	1.37		0.60492	0.707174	1.32
TMEM252	blue	protein_coding	0.661787	0.987941	1.56		0.72148	0.58943	1.36
AL162377.3	blue	protein_coding	0.54124	0.982905	1.55		0.559416	0.238543	1.21
ACCS	blue	protein_coding	0.340872	0.979552	0.72		0.121958	0.271906	0.86
MS4A4A	blue	protein_coding	0.519601	0.975467	1.33		0.343693	2.83173	2.62
CEACAM1	blue	protein_coding	0.57301	0.964079	1.43		0.588078	1.55896	1.51
OR2B2	blue	protein_coding	0.620269	0.958209	1.42		0.62228	1.03601	1.51
MILR1	blue	protein_coding	0.522916	0.930527	1.55		0.520886	1.7238	2.37
CDK5R1	blue	protein_coding	0.432793	0.927566	1.62		0.556477	0.219148	1.21
NT5C3B	blue	protein_coding	0.389942	0.882254	0.66		0.438621	0.310378	0.77
PDE9A	blue	protein_coding	0.523952	0.850452	0.68		0.458263	0.240742	0.84
OR2B6	blue	protein_coding	0.555742	0.84423	1.48		0.491805	0.680555	1.44
ZMAT4	blue	protein_coding	0.577381	0.835644	0.69		0.398429	0.75597	0.68
CLEC4F	blue	protein_coding	0.338421	0.832529	0.79		0.338026	0.0875713	0.95
TMEM45A	blue	protein_coding	0.352878	0.821808	1.42		0.375566	0.604423	1.39
SASH1	blue	protein_coding	0.414897	0.819126	0.76		0.369163	0.131735	0.9
EPHB4	blue	protein_coding	0.418384	0.796812	1.26		0.359851	0.120043	1.07
AL031777.2	blue	protein_coding	0.705447	0.795467	1.39		0.757045	0.909447	1.46
THBD	blue	protein_coding	0.551081	0.795383	1.46		0.636767	0.0397631	1.05
LGALS2	blue	protein_coding	0.339979	0.751095	0.82		0.334818	0.502016	0.83
BCAT1	blue	protein_coding	0.391703	0.720848	1.38		0.313361	0.373814	1.27
FN1	blue	protein_coding	0.612926	0.714456	0.6		0.526637	0.210707	0.84
RORC	blue	protein_coding	0.63988	0.706604	0.69		0.543992	2.08662	0.39
FLVCR2	blue	protein_coding	0.520544	0.700832	1.51		0.456191	0.700093	1.47
ADAM12	blue	protein_coding	0.521542	0.676328	0.72		0.37301	1.94497	0.43
GSTM4	blue	protein_coding	0.404046	0.665615	0.74		0.345663	0.734929	0.68
NTN4	blue	protein_coding	0.525104	0.664505	0.69		0.306504	1.31953	0.53
ADGRA3	blue	protein_coding	0.56933	0.662808	0.66		0.422213	0.849083	0.59
BTNL8	blue	protein_coding	0.533105	0.658489	1.43		0.640274	1.52229	1.88
CFAP54	blue	protein_coding	0.427215	0.657298	1.38		0.49092	1.05001	1.52
LIFR	blue	protein_coding	0.474179	0.634828	1.25		0.256879	1.48368	1.62
CNTNAP3	blue	protein_coding	0.402466	0.625843	1.2		0.424769	0.423478	1.15
SUCNR1	blue	protein_coding	0.416724	0.618013	1.3		0.212976	0.554713	1.31
CLEC6A	blue	protein_coding	0.487648	0.602915	1.45		0.321355	1.42272	1.82
CNTNAP3C	blue	protein_coding	0.397697	0.584612	1.18		0.412633	0.378514	1.15
ZNF429	blue	protein_coding	0.586585	0.578545	1.42		0.611363	1.23801	1.82
PTGES	blue	protein_coding	0.369649	0.55711	1.3		0.223714	0.847236	1.41
BTNL9	blue	protein_coding	0.480724	0.539815	0.75		0.397156	0.271906	0.82
HLA-DQB1	blue	protein_coding	0.271923	0.522311	0.84		0.394191	0.648268	0.78
TNR	blue	protein_coding	0.489765	0.519482	0.71		0.341777	0.133709	0.88
TTC9	blue	protein_coding	0.521248	0.492934	0.74		0.4488	0.969316	0.64
SLC4A10	blue	protein_coding	0.498641	0.437233	0.84		0.381626	1.21262	0.66
PACSIN1	blue	protein_coding	0.427465	0.389083	0.78		0.321472	1.08043	0.57
IL23R	blue	protein_coding	0.466836	0.329771	0.84		0.269599	0.925932	0.62
ARRDC3	blue	protein_coding	0.450459	0.311133	1.24		0.482251	0.361027	1.33
AL354822.1	blue	protein_coding	0.310894	0.268319	0.89		0.180209	0.139132	0.92
LRRC6	blue	protein_coding	0.436863	0.266653	1.18		0.481684	0.973453	1.46
GLIS3	blue	protein_coding	0.44259	0.26282	0.83		0.269123	1.31088	0.58
SERPINB2	blue	protein_coding	0.264106	0.248949	1.17		0.248072	0.930392	1.62
COL13A1	blue	protein_coding	0.353404	0.243418	0.85		0.0768426	0.800303	0.63
ZNF442	blue	protein_coding	0.276399	0.192276	1.13		0.287546	0.764324	1.46
KYNU	blue	protein_coding	0.299425	0.175111	1.16		0.0902006	0.97774	1.61
KLHDC8B	blue	protein_coding	0.486214	0.0838162	0.94		0.423969	0.469959	1.32
GSTM2	blue	protein_coding	0.392449	0.0123836	1.01		0.395911	0.82406	0.68
ZNF793	brown	protein_coding	0.863992	3.89108	0.3	1	0.839917	2.1008	0.39
TRIM2	brown	protein_coding	0.739086	3.77569	0.29		0.660753	0.151837	0.84
THEM5	brown	protein_coding	0.756391	3.46421	0.35		0.647326	1.62051	0.46
NELL2	brown	protein_coding	0.865178	3.18593	0.55	2	0.889584	2.49701	0.59	11	Yes
IGFBP3	brown	protein_coding	0.656216	3.11365	0.47		0.650726	2.04752	0.42
TBC1D4	brown	protein_coding	0.894336	3.03065	0.41	3	0.883529	2.3916	0.39	19	Yes
TESPA1	brown	protein_coding	0.903657	3.01176	0.46	4	0.925412	2.60272	0.36	6	Yes
FBLN5	brown	protein_coding	0.820168	2.99015	0.46		0.788583	1.6433	0.47
TNFRSF25	brown	protein_coding	0.866439	2.99015	0.5	5	0.885008	2.43906	0.38	17	Yes
PAIP2B	brown	protein_coding	0.895975	2.96394	0.36	6	0.899321	2.17437	0.39	30
CCDC152	brown	protein_coding	0.743943	2.94388	0.34		0.752558	1.487	0.51
EPHX2	brown	protein_coding	0.840902	2.92588	0.39		0.875026	3.00707	0.33	1
SPEF2	brown	protein_coding	0.886117	2.89223	0.42	7	0.87352	2.14152	0.4	37
ABLIM1	brown	protein_coding	0.911017	2.88782	0.33	8	0.935131	2.5665	0.33	7	Yes
ZNF483	brown	protein_coding	0.923167	2.8112	0.43	9	0.90042	1.85804	0.5	46
TRABD2A	brown	protein_coding	0.875081	2.79997	0.52	10	0.904603	2.45149	0.45	14	Yes
GPRASP1	brown	protein_coding	0.916222	2.73996	0.38	11	0.916851	2.00499	0.45	43
DYRK2	brown	protein_coding	0.89675	2.70923	0.47	12	0.881903	2.15375	0.41	35
GOLGA7B	brown	protein_coding	0.79697	2.70912	0.45		0.824769	2.39765	0.4
DPP4	brown	protein_coding	0.868816	2.69952	0.47	13	0.847294	2.35101	0.5
TRAF5	brown	protein_coding	0.954723	2.69923	0.43	14	0.956213	2.70803	0.31	3	Yes
BCL7A	brown	protein_coding	0.675388	2.69566	0.4		0.680026	1.00601	0.6
CD96	brown	protein_coding	0.857801	2.67908	0.54	15	0.855999	2.44588	0.47	15	Yes
LAMC2	brown	protein_coding	0.435051	2.65025	2.29		0.227527	0.251402	1.25
PPARG	brown	protein_coding	0.719064	2.64962	1.88		0.587444	0.984605	1.57
RIC3	brown	protein_coding	0.943943	2.64737	0.44	16	0.938836	1.71558	0.54	51
LEF1	brown	protein_coding	0.875878	2.64512	0.59	17	0.904527	2.28184	0.58	24
RASGRP1	brown	protein_coding	0.87273	2.64404	0.49	18	0.894356	2.42421	0.4	18	Yes
CD28	brown	protein_coding	0.92419	2.63991	0.53	19	0.913321	2.54398	0.5	9	Yes
GCNT4	brown	protein_coding	0.893271	2.62515	0.58	20	0.868752	1.70314	0.57	53
ACVR2B	brown	protein_coding	0.897676	2.60627	0.44	21	0.883114	1.7114	0.44	52
SYDE2	brown	protein_coding	0.801224	2.59056	0.49		0.839769	1.78063	0.47
IL2RA	brown	protein_coding	0.747372	2.58989	0.38		0.719013	1.05441	0.55
HLA-DOA	brown	protein_coding	0.73634	2.58287	0.49		0.708088	2.01188	0.48
APBB1	brown	protein_coding	0.871351	2.57969	0.39	22	0.878837	2.13722	0.46	38
BCL11B	brown	protein_coding	0.870568	2.57499	0.59	23	0.904352	2.70803	0.41	4
GPA33	brown	protein_coding	0.828542	2.57264	0.48		0.834792	1.7114	0.54
NR3C2	brown	protein_coding	0.923917	2.55389	0.52	24	0.931185	2.15375	0.5	36
SDR42E1	brown	protein_coding	0.890899	2.53346	0.46	25	0.894531	1.64568	0.52	58
RCAN3	brown	protein_coding	0.857705	2.52687	0.44	26	0.855936	1.79938	0.45	47
HPCAL4	brown	protein_coding	0.863869	2.51719	0.51	27	0.855604	1.21974	0.63	67
DIP2C	brown	protein_coding	0.851988	2.51224	0.45	28	0.830515	2.28156	0.41
CAMK4	brown	protein_coding	0.930259	2.50458	0.56	29	0.922039	2.22863	0.53	27
PLEKHA1	brown	protein_coding	0.863786	2.49462	0.45	30	0.860677	1.75148	0.46	49
THNSL1	brown	protein_coding	0.785654	2.49033	0.49		0.766402	1.71937	0.48
LRRN3	brown	protein_coding	0.820428	2.48189	0.55		0.839425	1.8584	0.54
KLHL32	brown	protein_coding	0.859582	2.47414	0.39	31	0.889892	1.29541	0.46	66
FAM169A	brown	protein_coding	0.823685	2.46614	0.49		0.841682	1.65663	0.47
RASGRF2	brown	protein_coding	0.879994	2.44638	0.45	32	0.917364	2.22619	0.46	28
NOG	brown	protein_coding	0.817683	2.43001	0.51		0.81095	2.26593	0.5
UBASH3A	brown	protein_coding	0.802888	2.42564	0.59		0.858903	3.00707	0.36	2
C5orf63	brown	protein_coding	0.921453	2.41347	0.48	33	0.921855	1.91593	0.41	45
CCR7	brown	protein_coding	0.833844	2.36314	0.56		0.867	2.24125	0.58	25
TMEM204	brown	protein_coding	0.821799	2.35225	0.5		0.804241	2.70803	0.36
C21orf59-TCP10L	brown	protein_coding	0.844825	2.3505	0.5		0.801519	2.24125	0.42
GLDN	brown	protein_coding	0.610911	2.34307	1.8		0.581183	0.309435	1.17
CHIC1	brown	protein_coding	0.826179	2.3398	0.49		0.839247	1.78407	0.49
GOLGA8B	brown	protein_coding	0.82122	2.30189	0.45		0.859659	1.31491	0.57	65
THEM4	brown	protein_coding	0.859637	2.29765	0.46	34	0.886872	1.94968	0.44	44
TRIB2	brown	protein_coding	0.8469	2.28359	0.52		0.856651	1.7432	0.49	50
ETS1	brown	protein_coding	0.890384	2.27887	0.41	35	0.920202	2.38771	0.38	20
RADX	brown	protein_coding	0.820801	2.26159	0.47		0.797104	1.6088	0.5
TCEA3	brown	protein_coding	0.767045	2.25989	0.52		0.82043	1.70911	0.49
PRKN	brown	protein_coding	0.835663	2.25799	0.42		0.815799	0.928533	0.62
KLRB1	brown	protein_coding	0.702082	2.24185	0.58		0.631798	1.88282	0.54
MID2	brown	protein_coding	0.830698	2.24185	0.45		0.861772	1.67622	0.57	56
ZNF662	brown	protein_coding	0.787724	2.24185	0.44		0.784457	1.39555	0.53
PI16	brown	protein_coding	0.726089	2.24105	0.38		0.602703	0.463987	0.67
SMARCD3	brown	protein_coding	0.853719	2.24075	2.63	36	0.818946	1.13486	1.85
IL7R	brown	protein_coding	0.891356	2.23643	0.59	37	0.887645	2.15435	0.52	34
TRAT1	brown	protein_coding	0.820621	2.22131	0.62		0.81152	1.49333	0.62
DENND11	brown	protein_coding	0.941248	2.21739	0.47	38	0.946414	2.70803	0.29	5
NECTIN3	brown	protein_coding	0.747351	2.2137	0.56		0.70551	0.814894	0.64
FAT4	brown	protein_coding	0.531789	2.20839	0.46		0.43388	0.916579	0.6
CCR8	brown	protein_coding	0.652515	2.20677	0.48		0.560436	1.48152	0.46
ZNF391	brown	protein_coding	0.751402	2.19998	0.41		0.771353	1.47532	0.51
AMIGO1	brown	protein_coding	0.848442	2.1906	0.42		0.854989	2.53723	0.33	10
ITK	brown	protein_coding	0.857281	2.1906	0.6	39	0.890925	2.55314	0.43	8
CDHR3	brown	protein_coding	0.824226	2.17647	0.57		0.862858	2.4714	0.41	13
ID3	brown	protein_coding	0.857592	2.17644	0.46	40	0.817646	1.97038	0.41
BACH2	brown	protein_coding	0.861297	2.17367	0.55	41	0.879119	2.34279	0.52	22
GDF7	brown	protein_coding	0.787167	2.16369	0.45		0.793793	0.53218	0.68
CRTAM	brown	protein_coding	0.479026	2.16347	0.59		0.620394	2.16489	0.42
CD40LG	brown	protein_coding	0.896335	2.15941	0.39	42	0.859422	2.49701	0.27	12
INPP4B	brown	protein_coding	0.875756	2.14927	0.64	43	0.867049	2.24125	0.54	26
OXNAD1	brown	protein_coding	0.903862	2.14054	0.45	44	0.91114	2.17428	0.36	32
ANKRD36	brown	protein_coding	0.810361	2.13322	0.49		0.822463	1.51927	0.52
WNT7A	brown	protein_coding	0.80965	2.13242	0.52		0.783653	0.883462	0.63
ZNF540	brown	protein_coding	0.861963	2.12208	0.52	45	0.864462	1.41229	0.55	64
FSIP2	brown	protein_coding	0.79003	2.12145	0.5		0.853984	1.00138	0.62	70
NAP1L2	brown	protein_coding	0.753072	2.10567	0.48		0.776996	1.30255	0.55
ROPN1B	brown	protein_coding	0.723221	2.10567	0.47		0.717991	1.06199	0.59
P2RY10	brown	protein_coding	0.889235	2.10088	0.61	46	0.910246	2.29735	0.45	23
TC2N	brown	protein_coding	0.865039	2.09977	0.57	47	0.852277	2.44472	0.47	16
NAP1L3	brown	protein_coding	0.696551	2.0974	0.44		0.663971	1.06207	0.53
ZNF681	brown	protein_coding	0.823505	2.09656	0.52		0.813964	1.83337	0.48
RNASE1	brown	protein_coding	0.394871	2.07702	1.83		0.376858	0.724625	1.28
AK5	brown	protein_coding	0.857931	2.06852	0.45	48	0.829398	1.82549	0.51
KLF12	brown	protein_coding	0.86076	2.06833	0.61	49	0.895366	2.17924	0.48	29
ZNF80	brown	protein_coding	0.613828	2.06638	0.46		0.639747	1.29541	0.59
ZIK1	brown	protein_coding	0.807695	2.06455	0.46		0.861951	2.03015	0.37	39
LCK	brown	protein_coding	0.747787	2.06313	0.61		0.75443	2.55314	0.45
PATJ	brown	protein_coding	0.906126	2.05283	0.52	50	0.912409	1.54448	0.57	63
AXIN2	brown	protein_coding	0.845072	2.03898	0.56		0.792506	2.53142	0.34
FAM153A	brown	protein_coding	0.761437	2.03444	0.54		0.761879	1.52149	0.54
SEMA5A	brown	protein_coding	0.647603	2.01432	0.48		0.483217	1.03668	0.54
ITM2A	brown	protein_coding	0.656389	2.0036	0.58		0.72858	2.15021	0.49
ZNF365	brown	protein_coding	0.630908	2.00342	0.44		0.585808	0.894202	0.55
PTPRK	brown	protein_coding	0.852851	1.98946	0.56	51	0.81631	2.13495	0.48
DNAH6	brown	protein_coding	0.803953	1.95801	0.5		0.759449	0.524018	0.7
CNKSR2	brown	protein_coding	0.910371	1.94574	0.59	52	0.9005	2.17437	0.46	31
SLAMF1	brown	protein_coding	0.906436	1.94525	0.5	53	0.908664	2.35101	0.35	21
ZNF781	brown	protein_coding	0.753668	1.94	0.49		0.772883	0.786328	0.69
ABCD2	brown	protein_coding	0.770427	1.93102	0.68		0.769775	2.10088	0.56
TMEM263	brown	protein_coding	0.790369	1.92184	0.48		0.795514	1.9912	0.39
ZSWIM5	brown	protein_coding	0.824087	1.92077	0.45		0.83338	1.30784	0.53
TAFA1	brown	protein_coding	0.768526	1.91367	0.54		0.714022	0.556513	0.68
OSCAR	brown	protein_coding	0.798944	1.89793	1.96		0.792261	1.52229	2.04
HAPLN3	brown	protein_coding	0.673602	1.87421	0.62		0.613155	2.67374	0.3
CCDC196	brown	protein_coding	0.835412	1.87113	0.47		0.825233	1.4001	0.55
ZNF835	brown	protein_coding	0.711369	1.86314	0.44		0.719295	1.21444	0.48
ZNF229	brown	protein_coding	0.734609	1.86148	0.4		0.816221	1.83054	0.4
LAX1	brown	protein_coding	0.732023	1.85228	0.53		0.751602	2.04359	0.45
ZNF239	brown	protein_coding	0.859276	1.84878	0.5	54	0.834832	2.00249	0.44
BCL2	brown	protein_coding	0.845127	1.84664	0.56		0.884914	1.64568	0.47	59
ZNF154	brown	protein_coding	0.716533	1.84664	0.53		0.806006	1.99095	0.42
ICOS	brown	protein_coding	0.856795	1.84199	0.62	55	0.880021	2.01262	0.52	41
CD3G	brown	protein_coding	0.638208	1.83543	0.64		0.747245	2.38251	0.47
FZD3	brown	protein_coding	0.82008	1.83543	0.43		0.845802	1.63901	0.44
CATSPERB	brown	protein_coding	0.830864	1.83417	0.57		0.848054	1.7949	0.49
GCSAM	brown	protein_coding	0.86037	1.832	0.54	56	0.904156	1.69408	0.49	54
CA6	brown	protein_coding	0.71502	1.83079	0.56		0.751124	1.9747	0.51
CCR4	brown	protein_coding	0.745792	1.8144	0.5		0.681876	1.79028	0.43
CD27	brown	protein_coding	0.740498	1.81408	0.43		0.736356	1.76201	0.45
CRIP2	brown	protein_coding	0.769836	1.80365	0.47		0.701707	0.431808	0.76
FSBP	brown	protein_coding	0.810998	1.80263	0.51		0.836878	1.44515	0.55
FAAH2	brown	protein_coding	0.841552	1.79241	0.52		0.859194	1.09114	0.62	69
CACNB4	brown	protein_coding	0.531974	1.7887	0.49		0.426123	0.581594	0.68
CD300LD	brown	protein_coding	0.427915	1.78221	1.48		0.456623	0.749924	1.27
ZNF257	brown	protein_coding	0.655429	1.7816	0.56		0.628822	0.532823	0.73
AGMAT	brown	protein_coding	0.783395	1.78104	0.46		0.841499	2.22073	0.38
TMIGD2	brown	protein_coding	0.742443	1.73177	0.53		0.653854	2.70803	0.36
FHIT	brown	protein_coding	0.666511	1.71302	0.46		0.583766	1.02908	0.47
COL4A4	brown	protein_coding	0.732271	1.70464	0.44		0.749743	0.567765	0.65
MYEF2	brown	protein_coding	0.636297	1.7043	0.6		0.578457	0.673782	0.71
GPR183	brown	protein_coding	0.860605	1.69614	0.48	57	0.89937	1.68427	0.44	55
ACVR1C	brown	protein_coding	0.811757	1.68632	0.5		0.759024	0.965553	0.62
GLB1L3	brown	protein_coding	0.593257	1.68632	0.57		0.576192	2.01761	0.45
USP44	brown	protein_coding	0.791396	1.67194	0.52		0.831105	1.97038	0.44
CCDC141	brown	protein_coding	0.840802	1.66254	0.65		0.851075	2.17428	0.5	33
SIT1	brown	protein_coding	0.742703	1.64451	0.58		0.784325	2.28717	0.45
FLT3	brown	protein_coding	0.621422	1.62662	1.67		0.605519	0.314339	1.17
THEMIS	brown	protein_coding	0.668602	1.6192	0.66		0.712552	2.15375	0.52
HOOK1	brown	protein_coding	0.81946	1.61719	0.56		0.841512	1.54448	0.54
MAP9	brown	protein_coding	0.828362	1.59993	0.57		0.831226	1.03668	0.66
CTLA4	brown	protein_coding	0.734597	1.5997	0.56		0.70614	1.84529	0.49
ANKRD36B	brown	protein_coding	0.809418	1.59883	0.56		0.787913	1.42208	0.59
RAB20	brown	protein_coding	0.790851	1.5881	1.77		0.802547	1.16056	1.47
IKZF2	brown	protein_coding	0.667119	1.58388	0.65		0.698172	1.84529	0.54
EML5	brown	protein_coding	0.802632	1.58054	0.47		0.788199	0.420088	0.72
CD3D	brown	protein_coding	0.635727	1.53633	0.65		0.749613	1.94968	0.54
GPRIN3	brown	protein_coding	0.684944	1.53633	0.55		0.734161	1.54961	0.51
OR2T3	brown	protein_coding	0.600999	1.49717	0.46		0.541686	0.435294	0.7
ZNF135	brown	protein_coding	0.565734	1.49717	0.54		0.569163	1.23014	0.58
AQP3	brown	protein_coding	0.761852	1.47533	0.55		0.71757	1.63931	0.5
MOXD1	brown	protein_coding	0.541584	1.4712	0.54		0.524121	1.01568	0.58
TPD52	brown	protein_coding	0.821019	1.4642	0.54		0.81942	1.611	0.45
XKRX	brown	protein_coding	0.704537	1.46162	0.58		0.711555	1.10292	0.61
BEX2	brown	protein_coding	0.764961	1.46017	0.55		0.820979	1.0611	0.54
SLC16A10	brown	protein_coding	0.803043	1.44264	0.54		0.861638	1.77015	0.52	48
EPHA4	brown	protein_coding	0.883388	1.44245	0.65	58	0.85881	1.55977	0.57	62
NRCAM	brown	protein_coding	0.707995	1.43862	0.6		0.743656	1.48919	0.62
VSIG1	brown	protein_coding	0.794137	1.43297	0.59		0.869775	1.21292	0.64	68
TRPC1	brown	protein_coding	0.7729	1.4314	0.47		0.785174	0.887948	0.62
ADAM28	brown	protein_coding	0.766102	1.42751	0.55		0.79819	1.53229	0.55
MICU3	brown	protein_coding	0.792071	1.41281	0.63		0.798941	0.536073	0.72
ST8SIA1	brown	protein_coding	0.707098	1.38337	0.66		0.767957	1.25994	0.64
ZSCAN23	brown	protein_coding	0.763042	1.36623	0.59		0.714604	1.27016	0.57
CTSD	brown	protein_coding	0.785268	1.35639	1.91		0.799276	1.9747	2.85
CD8B	brown	protein_coding	0.413631	1.35387	0.7		0.551218	2.12333	0.53
GOLGA8A	brown	protein_coding	0.840412	1.35301	0.58		0.852867	2.00919	0.44	42
DACT1	brown	protein_coding	0.632646	1.32424	0.6		0.55158	0.665277	0.66
ADAMTS1	brown	protein_coding	0.458427	1.31996	0.59		0.322141	0.486106	0.73
C12orf42	brown	protein_coding	0.89281	1.31811	0.59	59	0.90374	1.64524	0.52	60
KLF8	brown	protein_coding	0.814929	1.31495	0.53		0.78966	1.23635	0.5
DSC1	brown	protein_coding	0.769646	1.31359	0.63		0.735195	1.72747	0.53
ADTRP	brown	protein_coding	0.618669	1.29559	0.62		0.669103	0.641378	0.72
TXK	brown	protein_coding	0.757435	1.29559	0.6		0.803083	2.12333	0.43
RAB30	brown	protein_coding	0.848836	1.28728	0.54		0.831489	1.85201	0.45
FBLN7	brown	protein_coding	0.817067	1.28624	0.58		0.781607	1.91818	0.47
BLNK	brown	protein_coding	0.717044	1.28319	0.56		0.699039	1.49204	0.5
EDAR	brown	protein_coding	0.795658	1.27767	0.62		0.803995	1.78407	0.51
KHDRBS2	brown	protein_coding	0.713544	1.27475	0.62		0.723308	2.17051	0.37
WNT16	brown	protein_coding	0.728394	1.27295	0.62		0.789553	1.05177	0.57
AKAP6	brown	protein_coding	0.831467	1.27154	0.63		0.823955	1.46668	0.54
AHI1	brown	protein_coding	0.70227	1.27037	0.55		0.648344	0.427554	0.74
ANK3	brown	protein_coding	0.886117	1.26553	0.65	60	0.860092	1.64136	0.58	61
EDA	brown	protein_coding	0.667513	1.25603	0.62		0.68553	1.39195	0.58
SORCS3	brown	protein_coding	0.72514	1.20485	0.61		0.669524	0.852639	0.62
GPR55	brown	protein_coding	0.436129	1.20067	0.6		0.534823	1.56497	0.46
STRBP	brown	protein_coding	0.85325	1.19796	0.54	61	0.881304	2.02418	0.36	40
PTPRG	brown	protein_coding	0.508339	1.19616	0.51		0.459393	0.0737038	0.92
PTPN13	brown	protein_coding	0.770981	1.19295	0.59		0.703065	1.04316	0.62
ADAM23	brown	protein_coding	0.735995	1.19044	0.66		0.666683	1.57623	0.52
RAPGEF5	brown	protein_coding	0.569279	1.18761	0.65		0.435725	0.808529	0.64
S1PR1	brown	protein_coding	0.762288	1.18743	0.57		0.757406	1.49693	0.53
AC139491.7	brown	protein_coding	0.677358	1.17705	0.57		0.683617	1.65663	0.46
CD72	brown	protein_coding	0.601837	1.17705	0.6		0.557076	1.62285	0.49
CXCR5	brown	protein_coding	0.754799	1.17218	0.62		0.793198	2.45149	0.42
CNTNAP2	brown	protein_coding	0.715818	1.16763	0.69		0.686782	1.18674	0.66
TMEM156	brown	protein_coding	0.74129	1.1645	0.59		0.790942	1.31181	0.55
SARDH	brown	protein_coding	0.711963	1.162	0.63		0.660615	2.14088	0.39
OR10G2	brown	protein_coding	0.639733	1.1579	0.61		0.631174	1.44906	0.5
OVGP1	brown	protein_coding	0.70818	1.15081	0.57		0.746517	0.970099	0.57
GLYATL1B	brown	protein_coding	0.724929	1.14547	0.66		0.758309	1.06053	0.65
COL4A3	brown	protein_coding	0.765239	1.14398	0.55		0.765655	0.524342	0.69
FREM3	brown	protein_coding	0.538443	1.13857	0.61		0.404549	0.219502	0.81
CCR6	brown	protein_coding	0.851376	1.13316	0.61	62	0.824648	1.96668	0.46
ZNF860	brown	protein_coding	0.780407	1.12241	0.71		0.803079	1.57695	0.62
CD79A	brown	protein_coding	0.53969	1.11886	0.72		0.567961	0.855633	0.73
NIBAN3	brown	protein_coding	0.669579	1.08046	0.73		0.646923	1.81648	0.59
F12	brown	protein_coding	0.666104	1.07803	1.57		0.584561	1.89244	2.21
ZFYVE9	brown	protein_coding	0.823982	1.064	0.55		0.835274	1.0975	0.55
AHNAK2	brown	protein_coding	0.724885	1.05654	0.67		0.603141	0.93155	0.65
SIGLEC6	brown	protein_coding	0.496487	1.04507	0.65		0.615014	1.37648	0.55
ZNF711	brown	protein_coding	0.767668	1.04381	0.65		0.747424	1.53192	0.48
RGMB	brown	protein_coding	0.826371	1.0423	0.6		0.748738	0.344345	0.73
ZNF667	brown	protein_coding	0.702417	1.03639	0.57		0.594797	0.779899	0.63
CCSER1	brown	protein_coding	0.715871	1.03283	0.6		0.714424	0.790521	0.63
ABCB4	brown	protein_coding	0.76417	1.0296	0.65		0.747075	1.44815	0.54
PTPRM	brown	protein_coding	0.489718	1.01749	0.7		0.363376	0.562183	0.75
HS3ST1	brown	protein_coding	0.671737	1.0144	0.62		0.587904	1.15271	0.59
KIAA1324L	brown	protein_coding	0.70929	1.01248	0.63		0.687537	1.88282	0.54
SYT17	brown	protein_coding	0.610079	1.00303	0.62		0.580794	1.49865	0.48
LARGE1	brown	protein_coding	0.723092	1.00235	0.67		0.740324	1.44494	0.59
MACROD2	brown	protein_coding	0.623643	0.997186	0.68		0.580576	0.844911	0.71
KCNH8	brown	protein_coding	0.786086	0.995507	0.7		0.740998	1.37325	0.58
ACSL6	brown	protein_coding	0.702647	0.99257	0.62		0.653514	1.18236	0.59
RASSF6	brown	protein_coding	0.669049	0.976833	0.64		0.70586	0.265407	0.84
NBEA	brown	protein_coding	0.677974	0.973398	0.63		0.730542	0.720394	0.62
SGCE	brown	protein_coding	0.813429	0.968921	0.62		0.862219	1.65635	0.52	57
DSEL	brown	protein_coding	0.673716	0.964909	0.65		0.550552	0.631827	0.68
FAM184A	brown	protein_coding	0.823551	0.964909	0.62		0.779508	1.21973	0.57
NEXMIF	brown	protein_coding	0.715784	0.954857	0.59		0.709519	0.976405	0.63
CD22	brown	protein_coding	0.619331	0.942766	0.75		0.597399	1.31798	0.65
GPR15	brown	protein_coding	0.570788	0.939747	0.76		0.464704	0.814883	0.75
PMEPA1	brown	protein_coding	0.732321	0.939747	0.64		0.711962	1.78407	0.39
COL19A1	brown	protein_coding	0.770775	0.932643	0.77		0.750556	1.85804	0.61
FCRLA	brown	protein_coding	0.661737	0.927566	0.73		0.659158	1.27387	0.65
CD79B	brown	protein_coding	0.756052	0.916546	0.69		0.791505	2.10088	0.46
PCDH9	brown	protein_coding	0.67965	0.914138	0.77		0.601202	0.893486	0.72
BTLA	brown	protein_coding	0.756039	0.913819	0.66		0.740502	1.53188	0.48
AFF3	brown	protein_coding	0.7344	0.912598	0.75		0.684821	1.85804	0.63
ENAM	brown	protein_coding	0.773483	0.911834	0.64		0.707342	1.49333	0.5
GADD45G	brown	protein_coding	0.648325	0.89914	1.62		0.625551	0.78742	1.53
KIF5C	brown	protein_coding	0.821744	0.896896	0.6		0.804147	1.49333	0.47
MS4A1	brown	protein_coding	0.738038	0.893269	0.77		0.753581	1.27239	0.67
C14orf132	brown	protein_coding	0.709669	0.892372	0.64		0.650012	1.7432	0.49
TNFRSF13B	brown	protein_coding	0.519077	0.885065	0.68		0.595237	0.627574	0.73
CD19	brown	protein_coding	0.578194	0.884844	0.72		0.635212	1.10084	0.67
KLHL14	brown	protein_coding	0.696084	0.873197	0.74		0.64124	1.30582	0.66
DENND5B	brown	protein_coding	0.64449	0.86496	0.69		0.681326	1.30255	0.6
ISM1	brown	protein_coding	0.700047	0.864813	0.59		0.644436	0.344185	0.75
PARM1	brown	protein_coding	0.628526	0.861882	0.69		0.614536	0.58943	0.71
NEFL	brown	protein_coding	0.624663	0.861576	0.65		0.616786	0.611018	0.67
PAX5	brown	protein_coding	0.579221	0.853376	0.78		0.57415	1.65214	0.65
HKDC1	brown	protein_coding	0.747242	0.852727	0.71		0.635913	0.543817	0.76
DOK6	brown	protein_coding	0.566513	0.848808	0.71		0.518182	1.67276	0.49
SPIB	brown	protein_coding	0.722233	0.838423	0.72		0.731574	1.86809	0.51
KCNMA1	brown	protein_coding	0.350625	0.833707	1.22		0.317114	0.453633	1.17
SCN3A	brown	protein_coding	0.623115	0.832048	0.73		0.552929	1.37648	0.59
STEAP1B	brown	protein_coding	0.628421	0.827642	0.67		0.649327	1.67622	0.49
OSBPL10	brown	protein_coding	0.773395	0.818884	0.73		0.774114	1.19364	0.66
POU2AF1	brown	protein_coding	0.553583	0.811194	0.72		0.511815	0.527122	0.77
GPM6A	brown	protein_coding	0.40189	0.801957	0.75		0.179634	0.123977	0.91
TNFRSF13C	brown	protein_coding	0.573198	0.801957	0.75		0.563667	1.29992	0.66
MAL	brown	protein_coding	0.759061	0.797456	0.69		0.730055	1.40006	0.61
GATM	brown	protein_coding	0.576103	0.787626	0.67		0.709835	0.424495	0.72
GNG7	brown	protein_coding	0.336744	0.775446	0.65		0.304933	0.0864455	0.9
USP17L7	brown	protein_coding	0.388399	0.755347	0.72		0.313326	0.39295	0.78
HLA-DOB	brown	protein_coding	0.590667	0.750986	0.71		0.507373	0.549314	0.71
CD8B2	brown	protein_coding	0.330584	0.747507	0.74		0.324815	0.738623	0.73
ZNF727	brown	protein_coding	0.592254	0.741565	0.76		0.541036	0.818495	0.72
KCNG1	brown	protein_coding	0.526598	0.709569	0.72		0.59953	0.974901	0.6
MTUS1	brown	protein_coding	0.762917	0.684547	0.7		0.771518	0.754997	0.64
FAM153B	brown	protein_coding	0.730779	0.676824	0.67		0.565634	0.90407	0.61
DTX1	brown	protein_coding	0.532196	0.671542	0.73		0.608436	1.54319	0.52
BANK1	brown	protein_coding	0.761513	0.653727	0.75		0.755025	1.43566	0.58
CLNK	brown	protein_coding	0.678987	0.653727	0.69		0.69445	1.67309	0.41
BEND5	brown	protein_coding	0.782335	0.650303	0.7		0.756647	1.58564	0.48
COBLL1	brown	protein_coding	0.719701	0.64836	0.68		0.713633	0.745021	0.64
KANK1	brown	protein_coding	0.635542	0.648125	0.69		0.6454	1.17351	0.56
SNTG2	brown	protein_coding	0.587616	0.639125	0.69		0.571362	1.11771	0.57
CD200	brown	protein_coding	0.690434	0.618041	0.77		0.658381	1.66344	0.55
MKRN3	brown	protein_coding	0.43114	0.586707	0.74		0.465524	1.05902	0.63
BLK	brown	protein_coding	0.643019	0.576674	0.8		0.627101	1.0975	0.68
TCN2	brown	protein_coding	0.708033	0.576674	1.33		0.653179	1.18522	1.59
PTPRB	brown	protein_coding	0.62011	0.571003	0.72		0.659511	0.458036	0.73
FAM167A	brown	protein_coding	0.41252	0.569144	0.74		0.45687	1.30967	0.57
KRT73	brown	protein_coding	0.588401	0.559099	0.78		0.53506	1.86148	0.56
TCL1A	brown	protein_coding	0.646477	0.552037	0.85		0.525372	2.31921	0.66
NTNG1	brown	protein_coding	0.58555	0.542175	0.7		0.497597	0.0984101	1.13
TSHZ2	brown	protein_coding	0.698087	0.522311	0.77		0.614692	0.684789	0.72
KRT72	brown	protein_coding	0.590762	0.518668	0.78		0.516821	1.83034	0.57
N4BP3	brown	protein_coding	0.663741	0.518668	0.74		0.680209	1.61205	0.5
IGLL5	brown	protein_coding	0.518625	0.516317	0.79		0.395103	1.10506	0.66
UGT8	brown	protein_coding	0.695141	0.510794	0.77		0.765767	0.930392	0.69
CR2	brown	protein_coding	0.724048	0.498713	0.77		0.696403	1.78583	0.5
ZNF415	brown	protein_coding	0.322205	0.47341	0.76		0.310805	0.0849872	0.91
TSBP1	brown	protein_coding	0.6508	0.467354	0.76		0.574019	0.0372872	0.96
MERTK	brown	protein_coding	0.508423	0.448762	1.28		0.289843	2.54398	2.65
NBPF3	brown	protein_coding	0.440819	0.442951	0.78		0.462518	0.532823	0.7
FCER2	brown	protein_coding	0.536286	0.437233	0.76		0.396841	1.0156	0.6
ALPK2	brown	protein_coding	0.523878	0.425719	0.78		0.475674	0.374288	0.76
FCRL5	brown	protein_coding	0.348395	0.425398	0.83		0.429773	0.386658	0.81
SEMA3A	brown	protein_coding	0.506186	0.410853	0.75		0.658326	0.189679	0.83
POU5F1B	brown	protein_coding	0.466111	0.406956	0.81		0.410756	0.9803	0.64
PLEKHG7	brown	protein_coding	0.672307	0.389578	0.77		0.682685	0.546181	0.7
BEND4	brown	protein_coding	0.561308	0.379977	0.78		0.6269	0.866926	0.63
SLITRK5	brown	protein_coding	0.387306	0.378975	0.76		0.23092	0.293083	1.31
EBF1	brown	protein_coding	0.711114	0.357851	0.84		0.701385	1.14237	0.64
BMP3	brown	protein_coding	0.348789	0.35486	0.79		0.0708898	0.174041	0.84
RIMS2	brown	protein_coding	0.366698	0.352094	1.22		0.33444	0.88269	1.5
USP17L2	brown	protein_coding	0.407693	0.337616	0.81		0.293471	0.410701	0.76
PRKG2	brown	protein_coding	0.498277	0.335486	0.79		0.448103	0.517172	0.68
SAMD12	brown	protein_coding	0.588953	0.322209	0.85		0.672832	0.794548	0.7
P2RX5	brown	protein_coding	0.504551	0.318923	0.81		0.497958	1.05054	0.56
CNTNAP3B	brown	protein_coding	0.24205	0.318763	1.16		0.255579	0.553046	1.27
DNAH8	brown	protein_coding	0.435019	0.303293	0.83		0.471152	0.479783	0.76
CHL1	brown	protein_coding	0.595173	0.292169	0.82		0.510364	0.16285	0.87
SOX5	brown	protein_coding	0.399955	0.292169	0.85		0.454377	0.489113	0.75
TIMD4	brown	protein_coding	0.546421	0.283931	0.8		0.693565	1.13521	0.57
LIX1	brown	protein_coding	0.637587	0.282881	0.85		0.625439	1.73076	0.48
SULT1A1	brown	protein_coding	0.259496	0.272803	1.2		0.27087	0.0360283	1.04
TMEM155	brown	protein_coding	0.224198	0.217275	0.85		0.189224	0.966832	0.6
TIMP3	brown	protein_coding	0.460527	0.201588	0.84		0.304653	0.159567	0.84
PKD2L1	brown	protein_coding	0.349667	0.1918	1.16		0.289014	1.69708	2.13
S100B	brown	protein_coding	0.406543	0.179566	0.91		0.529421	0.663966	0.77
VPREB3	brown	protein_coding	0.542906	0.175621	0.86		0.597334	0.775876	0.68
DCDC1	brown	protein_coding	0.353731	0.170243	0.86		0.362015	0.070501	0.91
SIGLEC11	brown	protein_coding	0.544811	0.16634	1.12		0.440404	0.241039	1.19
FCRL2	brown	protein_coding	0.620651	0.165481	0.91		0.650914	0.902108	0.7
HSPA12A	brown	protein_coding	0.446778	0.15702	0.86		0.440753	0.778746	0.65
PPIAL4H	brown	protein_coding	0.438238	0.156632	1.15		0.334112	0.616315	1.6
SLC38A11	brown	protein_coding	0.533208	0.150594	0.92		0.528585	1.0718	0.61
GSTM3	brown	protein_coding	0.601946	0.132187	0.89		0.513155	1.42851	0.58
FCRL1	brown	protein_coding	0.586773	0.0703918	1.05		0.557514	0.705809	0.73
SPTSSB	brown	protein_coding	0.447875	0.0653994	0.95		0.479927	0.432376	0.73
HEPHL1	brown	protein_coding	0.428432	0.0605354	0.96		0.348193	0.151907	0.88
CPNE5	brown	protein_coding	0.226876	0.0597856	1.05		0.176281	0.00813307	1.01
PPP1R9A	brown	protein_coding	0.638673	0.0454085	0.96		0.594075	0.99288	0.5
ADAM29	brown	protein_coding	0.706105	0.0428682	0.96		0.662547	1.24312	0.55
NETO1	brown	protein_coding	0.432102	0.0308509	1.03		0.407637	0.00198392	1
PEG10	brown	protein_coding	0.55414	0.00501192	1		0.507069	0.348882	0.78
CX3CR1	black	protein_coding	0.586308	2.73996	0.45		0.685996	1.14606	0.63
PRR5L	black	protein_coding	0.776844	2.65549	0.49		0.645002	2.49701	0.36
MYBL1	black	protein_coding	0.823844	2.61085	0.51		0.773238	0.971072	0.65
TBC1D19	black	protein_coding	0.767229	2.58989	0.48		0.755731	1.73126	0.47
RORA	black	protein_coding	0.803416	2.45101	0.59		0.808705	2.03015	0.53
TGFBR3	black	protein_coding	0.955045	2.36171	0.61	1	0.960651	2.12333	0.53	7	Yes
ARL4C	black	protein_coding	0.905111	2.1906	0.59	2	0.921543	2.11038	0.45	10	Yes
SH2D1B	black	protein_coding	0.641976	2.16074	0.55		0.508097	2.05085	0.5
STAT4	black	protein_coding	0.837461	2.16048	0.49		0.844716	2.19678	0.43
ZNF683	black	protein_coding	0.572044	2.15414	0.59		0.680453	0.886376	0.7
ZNF853	black	protein_coding	0.754836	2.09977	0.57		0.811198	2.44472	0.38
IL2RB	black	protein_coding	0.6398	2.03817	0.63		0.604848	1.6903	0.57
SYTL2	black	protein_coding	0.857319	2.03817	0.59	3	0.84355	1.77955	0.54
RUNX3	black	protein_coding	0.632906	2.01833	0.54		0.663193	1.28067	0.55
CD247	black	protein_coding	0.897085	2.00227	0.63	4	0.88121	2.49701	0.43	2	Yes
CD2	black	protein_coding	0.88887	1.97349	0.62	5	0.89668	2.34279	0.51	4	Yes
MATK	black	protein_coding	0.913008	1.94525	0.64	6	0.873904	2.39765	0.44	3	Yes
SAMD3	black	protein_coding	0.934353	1.92481	0.61	7	0.948492	2.10961	0.52	12
MYO6	black	protein_coding	0.795922	1.87359	0.56		0.703262	0.81756	0.69
KLRK1	black	protein_coding	0.90973	1.87318	0.59	8	0.893069	2.5665	0.44	1	Yes
CD8A	black	protein_coding	0.757016	1.86119	0.64		0.796953	2.10088	0.53
KLRF1	black	protein_coding	0.645815	1.84664	0.64		0.546923	1.26381	0.61
ADGRG5	black	protein_coding	0.710891	1.82984	0.62		0.678136	1.43029	0.59
GPR174	black	protein_coding	0.853845	1.82309	0.65	9	0.828044	2.15021	0.52
TBX21	black	protein_coding	0.900568	1.82238	0.65	10	0.889186	2.11038	0.49	11
SH2D1A	black	protein_coding	0.79987	1.80821	0.67		0.788619	2.17437	0.54
KIF21A	black	protein_coding	0.895229	1.80765	0.62	11	0.880835	1.66404	0.54	24
CHST12	black	protein_coding	0.773382	1.79438	0.51		0.747415	1.48642	0.49
PLEKHF1	black	protein_coding	0.904399	1.79093	0.61	12	0.900518	2.28123	0.43	6
TIGIT	black	protein_coding	0.869625	1.78676	0.67	13	0.856325	2.3171	0.47	5
PRSS23	black	protein_coding	0.910832	1.75671	0.67	14	0.887689	1.67622	0.56	22
NCALD	black	protein_coding	0.940577	1.75308	0.61	15	0.934765	2.08719	0.49	13
LGR6	black	protein_coding	0.626074	1.74921	0.6		0.626042	1.16867	0.6
CCDC89	black	protein_coding	0.802062	1.74065	0.55		0.769946	0.761146	0.68
EOMES	black	protein_coding	0.934211	1.72014	0.68	16	0.926489	2.05197	0.52	17
ABCB1	black	protein_coding	0.777024	1.70762	0.58		0.730479	1.99066	0.45
CEP78	black	protein_coding	0.886867	1.7043	0.62	17	0.894857	2.05382	0.48	16
PYHIN1	black	protein_coding	0.94196	1.70208	0.66	18	0.950847	2.00499	0.52	18
KLRG1	black	protein_coding	0.868145	1.69575	0.67	19	0.885804	1.63175	0.6	27
COLGALT2	black	protein_coding	0.749597	1.68444	0.57		0.653492	1.05172	0.62
CLDND2	black	protein_coding	0.738021	1.66226	0.53		0.723013	0.485983	0.71
RRAS2	black	protein_coding	0.808182	1.64243	0.59		0.803383	1.9747	0.45
GZMM	black	protein_coding	0.862738	1.62365	0.65	20	0.850619	2.12333	0.48	8
PHLDB2	black	protein_coding	0.857059	1.60262	0.59	21	0.848671	1.73126	0.5
FASLG	black	protein_coding	0.923653	1.59606	0.63	22	0.909719	1.73762	0.59	20
BFSP1	black	protein_coding	0.84905	1.58054	0.58		0.845359	1.67276	0.46
XCL2	black	protein_coding	0.717409	1.57988	0.6		0.710765	1.60375	0.59
ENPP5	black	protein_coding	0.892668	1.57244	0.59	23	0.808142	1.583	0.49
NMUR1	black	protein_coding	0.801136	1.55399	0.68		0.725082	2.33624	0.44
ARHGEF28	black	protein_coding	0.824677	1.53633	0.65		0.713696	1.69565	0.44
LIM2	black	protein_coding	0.703761	1.52587	0.52		0.649348	1.18514	0.58
S1PR5	black	protein_coding	0.915443	1.51699	0.68	24	0.892488	1.67622	0.57	23
NCAM1	black	protein_coding	0.592809	1.51692	0.6		0.491045	0.645833	0.67
MCOLN2	black	protein_coding	0.829506	1.51244	0.66		0.86789	1.56432	0.58	28
SLFN5	black	protein_coding	0.66786	1.47979	0.49		0.605376	1.33111	0.51
SLAMF6	black	protein_coding	0.905044	1.47858	0.6	25	0.895438	2.12333	0.44	9
KLRC4	black	protein_coding	0.861632	1.46304	0.64	26	0.814987	2.06581	0.53
TLR3	black	protein_coding	0.730557	1.45301	0.54		0.666214	0.627902	0.67
DLG3	black	protein_coding	0.87408	1.43915	0.65	27	0.917923	1.96827	0.48	19
JAKMIP2	black	protein_coding	0.864285	1.43701	0.67	28	0.864458	2.06581	0.52	15
PRF1	black	protein_coding	0.819624	1.43459	0.7		0.732298	1.47986	0.56
FCRL6	black	protein_coding	0.894034	1.4246	0.73	29	0.874002	2.08226	0.53	14
FGFBP2	black	protein_coding	0.885002	1.41956	0.71	30	0.872514	1.65856	0.64	25
GPR171	black	protein_coding	0.702392	1.38445	0.59		0.628755	0.868061	0.62
PPP2R2B	black	protein_coding	0.950649	1.3711	0.66	31	0.933268	1.63291	0.54	26
CLIC3	black	protein_coding	0.754388	1.34817	0.65		0.724679	1.704	0.47
GZMA	black	protein_coding	0.778944	1.34685	0.7		0.765401	1.5877	0.59
GLB1L2	black	protein_coding	0.729546	1.33061	0.63		0.778279	1.55977	0.54
FCRL3	black	protein_coding	0.683473	1.31359	0.68		0.701144	1.64524	0.59
MCOLN3	black	protein_coding	0.748767	1.30207	0.58		0.701917	1.31521	0.57
GZMH	black	protein_coding	0.863619	1.29856	0.72	32	0.870133	1.34974	0.64	30
SLC4A4	black	protein_coding	0.886834	1.2976	0.68	33	0.841414	1.91583	0.49
C1orf21	black	protein_coding	0.937782	1.28318	0.68	34	0.938773	1.72747	0.53	21
GNLY	black	protein_coding	0.685765	1.27797	0.63		0.618861	1.51226	0.62
KIF19	black	protein_coding	0.67134	1.24289	0.69		0.685764	1.2212	0.64
A2M	black	protein_coding	0.792825	1.23958	0.74		0.825385	1.31189	0.68
IFNG	black	protein_coding	0.745771	1.23958	0.63		0.772103	1.78407	0.5
ADGRG1	black	protein_coding	0.699584	1.2297	0.69		0.637187	1.50101	0.56
GZMK	black	protein_coding	0.706495	1.20332	0.71		0.700532	2.12333	0.55
KLRC4-KLRK1	black	protein_coding	0.853015	1.17239	0.73	35	0.772702	1.2894	0.62
C19orf84	black	protein_coding	0.631798	1.14417	0.63		0.547455	0.679117	0.68
LEXM	black	protein_coding	0.805357	1.13857	0.65		0.803642	1.6505	0.54
PZP	black	protein_coding	0.778097	1.13857	0.76		0.789754	1.48919	0.67
UNC45B	black	protein_coding	0.731785	1.12609	0.66		0.728701	1.49674	0.47
CCR5	black	protein_coding	0.821392	1.12241	0.67		0.775477	1.53241	0.57
KLRC3	black	protein_coding	0.762104	1.12111	0.7		0.718754	1.07205	0.62
MYO3B	black	protein_coding	0.683929	1.03571	0.71		0.702377	0.895617	0.69
PDGFD	black	protein_coding	0.854457	1.03489	0.71	36	0.825399	1.24942	0.6
TRPC3	black	protein_coding	0.596768	1.01483	0.66		0.509945	0.216911	0.83
C4orf50	black	protein_coding	0.786111	1.01384	0.71		0.720752	2.38771	0.4
KLRD1	black	protein_coding	0.904302	0.93537	0.73	37	0.890183	1.51226	0.55	29
B3GAT1	black	protein_coding	0.600072	0.928939	0.75		0.60198	0.877257	0.69
DUSP2	black	protein_coding	0.71481	0.91727	0.69		0.757205	1.31251	0.52
PTGDR	black	protein_coding	0.784061	0.89784	0.69		0.665146	0.886952	0.6
SPON2	black	protein_coding	0.712388	0.889627	0.72		0.592386	1.54961	0.5
CCL4	black	protein_coding	0.7913	0.885965	0.68		0.730841	1.13877	0.55
CCL5	black	protein_coding	0.723524	0.881146	0.67		0.661021	1.97038	0.45
GZMB	black	protein_coding	0.700782	0.864813	0.73		0.638849	0.914722	0.67
KLRC2	black	protein_coding	0.604145	0.847347	0.81		0.494137	0.794055	0.75
NKG7	black	protein_coding	0.717543	0.845191	0.71		0.711207	0.849083	0.66
DTHD1	black	protein_coding	0.830701	0.828142	0.77		0.814639	1.35316	0.62
WDR63	black	protein_coding	0.652726	0.823743	0.69		0.598298	1.08858	0.61
HOPX	black	protein_coding	0.86115	0.811782	0.71	38	0.767246	1.23014	0.6
DDI1	black	protein_coding	0.81355	0.807944	0.68		0.81707	0.891634	0.58
FRMPD3	black	protein_coding	0.531659	0.785044	0.71		0.50916	0.889676	0.63
GFI1	black	protein_coding	0.843124	0.740728	0.68		0.780013	0.825422	0.63
LAG3	black	protein_coding	0.606418	0.74031	0.74		0.605157	0.755211	0.67
PDGFRB	black	protein_coding	0.528864	0.707011	0.78		0.482761	0.385511	0.77
TNIP3	black	protein_coding	0.735808	0.703831	0.66		0.773426	0.986742	0.61
SLC1A7	black	protein_coding	0.632552	0.644811	0.78		0.581402	0.849083	0.66
KIR2DL3	black	protein_coding	0.49807	0.623077	0.75		0.341631	1.10091	0.58
CARMIL3	black	protein_coding	0.489894	0.584612	0.72		0.47827	1.00085	0.58
PDCD1	black	protein_coding	0.631682	0.569533	0.77		0.613455	1.58927	0.48
RORB	black	protein_coding	0.440989	0.565433	0.73		0.456679	0.603221	0.7
TRPA1	black	protein_coding	0.694223	0.476397	0.74		0.633862	1.46404	0.56
SGCD	black	protein_coding	0.572163	0.471333	0.78		0.543451	1.60305	0.49
BNC2	black	protein_coding	0.654507	0.45988	0.79		0.473274	0.795386	0.62
PODN	black	protein_coding	0.624382	0.419772	0.76		0.467497	0.84351	0.6
LAIR2	black	protein_coding	0.580629	0.377996	0.84		0.488999	0.604835	0.75
NPTX1	black	protein_coding	0.422067	0.294639	0.82		0.398164	1.05138	0.59
KIR3DL2	black	protein_coding	0.522292	0.262855	0.84		0.352518	0.442485	0.7
CYP11B1	black	protein_coding	0.589631	0.260501	0.84		0.630386	1.38071	0.56
VIT	black	protein_coding	0.606761	0.257204	0.82		0.521625	0.886927	0.61
VCAM1	black	protein_coding	0.495357	0.211005	0.89		0.433966	0.452189	0.76
NUAK1	black	protein_coding	0.554029	0.203038	0.89		0.432732	0.11148	0.91
ENOSF1	red	protein_coding	0.854046	3.567	0.34	1	0.862398	1.93102	0.43	18
KLHL3	red	protein_coding	0.848564	3.42208	0.37		0.841584	2.43906	0.4
EVL	red	protein_coding	0.947283	2.96394	0.44	2	0.91349	2.17437	0.37	9	Yes
UGCG	red	protein_coding	0.773294	2.92721	1.87		0.645686	1.76201	1.74
SPOCK2	red	protein_coding	0.86664	2.89849	0.43	3	0.838308	2.50607	0.44
ALS2CL	red	protein_coding	0.760519	2.77775	0.46		0.794638	1.7432	0.49
ARG1	red	protein_coding	0.732841	2.77775	1.57		0.539358	1.32332	1.48
FCGBP	red	protein_coding	0.826137	2.68755	0.48		0.837272	3.00707	0.36
ST6GALNAC6	red	protein_coding	0.843228	2.64512	0.42		0.844046	1.44135	0.48
HEG1	red	protein_coding	0.775184	2.61752	0.5		0.784946	1.42851	0.49
S100A8	red	protein_coding	0.778634	2.59187	1.73		0.719541	2.08572	1.77
EXOC6	red	protein_coding	0.897366	2.57763	2.58	4	0.854158	1.21646	1.83	37
ATP10A	red	protein_coding	0.79013	2.5562	0.46		0.828835	1.81762	0.47
NLRC3	red	protein_coding	0.897077	2.55389	0.46	5	0.877582	2.44472	0.36	2	Yes
DEGS2	red	protein_coding	0.91079	2.53999	0.42	6	0.88352	1.88836	0.43	19
PCED1B	red	protein_coding	0.929974	2.52687	0.44	7	0.892493	1.79053	0.43	21
AUTS2	red	protein_coding	0.804975	2.52281	0.42		0.81505	1.92955	0.41
PLBD1	red	protein_coding	0.901281	2.4975	2.24	8	0.824166	1.70314	2.25
KCNA3	red	protein_coding	0.818194	2.45271	0.42		0.823491	1.69603	0.47
IGSF9B	red	protein_coding	0.899403	2.43957	0.54	9	0.889495	1.41688	0.57	34
PLCG1	red	protein_coding	0.910514	2.43957	0.56	10	0.861299	2.55314	0.36	1	Yes
ANO9	red	protein_coding	0.912291	2.43634	0.49	11	0.89819	1.67617	0.48	26
CROCC	red	protein_coding	0.875195	2.43019	0.39	12	0.828129	1.14154	0.54
ZAP70	red	protein_coding	0.82187	2.42394	0.6		0.813405	2.53142	0.41
OSBPL7	red	protein_coding	0.895011	2.40176	0.38	13	0.854949	1.08981	0.56	39
BCAS4	red	protein_coding	0.841757	2.35103	0.4		0.828026	2.17437	0.42
IL21R	red	protein_coding	0.798223	2.3306	0.42		0.801497	2.5665	0.35
MAP4K1	red	protein_coding	0.882999	2.32933	0.44	14	0.867313	1.78399	0.5	22
IL11RA	red	protein_coding	0.929609	2.29526	0.4	15	0.910117	1.30269	0.5	36
CD5	red	protein_coding	0.925359	2.28867	0.51	16	0.905018	1.97038	0.48	17
ATP8B2	red	protein_coding	0.851313	2.28359	0.49	17	0.857393	2.31921	0.4	6
CD6	red	protein_coding	0.930041	2.28231	0.62	18	0.9013	2.32259	0.48	5
GATA3	red	protein_coding	0.869654	2.27887	0.47	19	0.903897	2.28717	0.37	7
MAN1C1	red	protein_coding	0.884151	2.27569	0.48	20	0.859721	2.10674	0.4	14
PASK	red	protein_coding	0.804954	2.26514	0.42		0.87835	2.17051	0.34	10
LY9	red	protein_coding	0.867428	2.24319	0.51	21	0.813888	2.37521	0.4
SYCP2	red	protein_coding	0.720519	2.1906	2.03		0.665472	1.12479	1.8
AGAP1	red	protein_coding	0.732426	2.17717	0.58		0.701886	1.89653	0.52
ZNF827	red	protein_coding	0.909914	2.17681	0.5	22	0.891336	2.12333	0.47	12
PDZD4	red	protein_coding	0.604511	2.16369	0.57		0.521145	1.10091	0.67
HMGB2	red	protein_coding	0.744073	2.16074	2.01		0.667161	2.08662	2.31
HGF	red	protein_coding	0.82472	2.14927	1.85		0.729823	1.78314	1.53
NFATC2	red	protein_coding	0.834012	2.13242	0.54		0.83691	2.15114	0.43
IDI1	red	protein_coding	0.763076	2.12403	1.88		0.671755	1.26762	1.64
SHISAL2A	red	protein_coding	0.937752	2.05973	0.45	23	0.910841	2.28717	0.45	8
CD3E	red	protein_coding	0.930028	2.05112	0.61	24	0.914415	2.15393	0.48	11
PPP4R2	red	protein_coding	0.870241	2.00058	2.12	25	0.800679	0.90056	1.72
PLXNA1	red	protein_coding	0.898724	1.98606	0.51	26	0.857639	1.43566	0.5	33
NUP210	red	protein_coding	0.904353	1.9597	0.44	27	0.86847	0.866464	0.59	43
DGKK	red	protein_coding	0.50797	1.94041	0.55		0.457276	0.830098	0.65
OBSCN	red	protein_coding	0.880773	1.92895	0.53	28	0.852527	1.84946	0.47	20
CARD11	red	protein_coding	0.892588	1.91881	0.55	29	0.838465	2.45149	0.34
BIN1	red	protein_coding	0.762938	1.90605	0.51		0.766281	2.45149	0.34
ZNF831	red	protein_coding	0.869956	1.90208	0.61	30	0.838795	2.28999	0.44
PTGDS	red	protein_coding	0.576895	1.89637	0.55		0.51883	0.477042	0.77
TTC24	red	protein_coding	0.740729	1.87557	0.49		0.748648	2.28123	0.39
FAM102A	red	protein_coding	0.944567	1.86857	0.63	31	0.913191	2.33155	0.55	4
LRRC70	red	protein_coding	0.696405	1.85377	1.9		0.66284	0.899554	1.52
SCART1	red	protein_coding	0.850433	1.83417	0.56	32	0.769699	2.15114	0.41
ADAMTS10	red	protein_coding	0.868036	1.832	0.58	33	0.819384	2.12333	0.45
CARMIL2	red	protein_coding	0.950284	1.82309	0.55	34	0.930019	1.76831	0.5	23
PLXDC1	red	protein_coding	0.832675	1.81616	0.57		0.788431	1.54961	0.52
ITPR3	red	protein_coding	0.937145	1.81424	0.57	35	0.927302	2.10961	0.41	13
IL24	red	protein_coding	0.865299	1.79705	0.6	36	0.895992	2.08899	0.46	15
ZFYVE28	red	protein_coding	0.871473	1.79497	0.59	37	0.843813	1.99072	0.36
ZNF443	red	protein_coding	0.719068	1.78626	1.76		0.699035	0.410224	1.27
DTX3	red	protein_coding	0.859004	1.77889	0.58	38	0.845279	1.61931	0.51
SORBS3	red	protein_coding	0.876762	1.76507	0.5	39	0.873086	1.66404	0.56	28
FCMR	red	protein_coding	0.925011	1.75495	0.58	40	0.89151	2.35101	0.47	3
LAT	red	protein_coding	0.848188	1.7337	0.57		0.819871	1.34744	0.54
PRSS1	red	protein_coding	0.728821	1.728	0.53		0.764275	2.50607	0.34
STARD9	red	protein_coding	0.791232	1.72352	0.56		0.849457	2.08662	0.46
TCF7	red	protein_coding	0.926474	1.71302	0.54	41	0.887484	1.59743	0.46	29
SBK1	red	protein_coding	0.816116	1.70762	0.63		0.826838	1.62837	0.59
IKZF3	red	protein_coding	0.785344	1.67808	0.59		0.804625	1.91818	0.49
PRAG1	red	protein_coding	0.91481	1.67033	0.54	42	0.837924	1.59743	0.49
TTC16	red	protein_coding	0.663208	1.67033	0.59		0.644336	1.61205	0.55
SIRPG	red	protein_coding	0.862344	1.66124	0.55	43	0.847419	1.84946	0.53
SH2D2A	red	protein_coding	0.745561	1.65922	0.62		0.722825	0.627574	0.7
RNF157	red	protein_coding	0.834217	1.6589	0.55		0.820711	1.78407	0.48
CDC25B	red	protein_coding	0.926466	1.63833	0.61	44	0.923133	1.73762	0.48	24
SLC29A2	red	protein_coding	0.852742	1.61152	0.54	45	0.835399	1.76493	0.41
CD7	red	protein_coding	0.835814	1.57988	0.58		0.742683	1.76493	0.37
PNPLA7	red	protein_coding	0.847524	1.5538	0.52		0.76221	1.33703	0.53
UBAP1L	red	protein_coding	0.901209	1.53363	0.51	46	0.880455	1.00935	0.55	40
PLEKHG5	red	protein_coding	0.754769	1.52738	0.46		0.652312	0.407914	0.74
PRSS2	red	protein_coding	0.678246	1.51474	0.6		0.739693	2.38771	0.34
CACNA1I	red	protein_coding	0.814343	1.49529	0.63		0.780223	1.49507	0.59
NBN	red	protein_coding	0.799271	1.48877	1.99		0.790536	1.01568	1.72
ITGA3	red	protein_coding	0.82195	1.47979	0.56		0.750355	1.24942	0.51
PLXNA3	red	protein_coding	0.919081	1.4712	0.59	47	0.896684	1.19673	0.61	38
DUOX1	red	protein_coding	0.89983	1.46747	0.59	48	0.892471	1.48084	0.46	31
TUB	red	protein_coding	0.855115	1.46534	0.62	49	0.875061	1.66725	0.53	27
HIVEP3	red	protein_coding	0.806685	1.42751	0.61		0.807797	1.24254	0.56
NEDD4	red	protein_coding	0.681608	1.41217	1.82		0.667201	2.10185	2.05
ZNF395	red	protein_coding	0.846577	1.40577	0.52		0.778314	1.00428	0.58
COL6A2	red	protein_coding	0.713461	1.39273	0.67		0.710796	2.45286	0.44
RGS18	red	protein_coding	0.760272	1.38966	1.8		0.647156	0.557574	1.4
CTSW	red	protein_coding	0.653154	1.35639	0.69		0.631556	2.12333	0.51
NINL	red	protein_coding	0.643744	1.34609	0.58		0.696801	1.99557	0.51
ZNF512B	red	protein_coding	0.866087	1.33458	0.55	50	0.798659	1.15638	0.54
SLC4A3	red	protein_coding	0.514858	1.28833	0.54		0.462123	0.567812	0.69
PIK3C2B	red	protein_coding	0.915552	1.27886	0.61	51	0.885571	1.7114	0.48	25
CARNS1	red	protein_coding	0.92533	1.27562	0.62	52	0.88903	2.00499	0.41	16
DLG5	red	protein_coding	0.731629	1.2646	0.61		0.656187	1.31088	0.49
LTK	red	protein_coding	0.701189	1.25865	0.62		0.662179	1.81867	0.45
ZBED2	red	protein_coding	0.906067	1.25248	0.66	53	0.873993	1.51283	0.58	30
LDLRAP1	red	protein_coding	0.842181	1.24927	0.53		0.816596	1.5877	0.43
SLC17A9	red	protein_coding	0.721738	1.24728	0.55		0.713803	0.70346	0.63
PLXNA4	red	protein_coding	0.613618	1.22593	0.56		0.576107	0.395172	0.73
PTCH1	red	protein_coding	0.817427	1.2202	0.65		0.834027	1.46233	0.54
NPTXR	red	protein_coding	0.823045	1.19641	0.6		0.791738	1.1919	0.57
TLE2	red	protein_coding	0.811933	1.17492	0.57		0.755314	1.94659	0.38
MCF2L	red	protein_coding	0.738516	1.16923	0.54		0.705657	2.05109	0.38
APBA2	red	protein_coding	0.798496	1.1645	0.7		0.780379	2.66264	0.4
DNHD1	red	protein_coding	0.890421	1.15801	0.57	54	0.873109	1.30784	0.51	35
MAP3K9	red	protein_coding	0.915325	1.13299	0.62	55	0.871831	1.44763	0.52	32
TSPAN2	red	protein_coding	0.685225	1.13299	1.69		0.637115	1.12847	1.69
COL5A3	red	protein_coding	0.535664	1.0928	0.63		0.501308	1.35663	0.6
DCHS1	red	protein_coding	0.850643	1.08313	0.66	56	0.833786	1.64358	0.51
CELSR2	red	protein_coding	0.856929	1.07506	0.61	57	0.795174	1.67622	0.41
SH3PXD2A	red	protein_coding	0.854721	1.07334	0.61	58	0.791769	1.0611	0.54
SGSM1	red	protein_coding	0.727841	1.06364	0.69		0.760016	2.50607	0.32
IFNLR1	red	protein_coding	0.621837	1.03291	0.64		0.638107	1.34289	0.57
CATSPER2	red	protein_coding	0.693322	1.03283	0.67		0.686183	0.65322	0.64
CSTA	red	protein_coding	0.722702	1.03283	1.58		0.609111	0.971067	1.81
SLC25A23	red	protein_coding	0.788806	1.02709	0.58		0.7984	1.32982	0.52
KIAA1671	red	protein_coding	0.650438	0.939747	0.77		0.639452	1.65635	0.58
PMEL	red	protein_coding	0.855001	0.928554	0.6	59	0.852442	0.893486	0.56	42
LTBP3	red	protein_coding	0.846623	0.91727	0.6		0.793784	0.928533	0.57
SDK2	red	protein_coding	0.681087	0.885065	0.73		0.589086	1.26381	0.65
PNMA3	red	protein_coding	0.760218	0.864813	0.7		0.704594	1.40048	0.6
CD248	red	protein_coding	0.594253	0.856262	0.65		0.574226	1.01568	0.58
CLEC12B	red	protein_coding	0.506131	0.855512	1.42		0.250436	0.191475	1.14
ANXA1	red	protein_coding	0.706235	0.75822	1.55		0.589316	1.51283	2.22
ICOSLG	red	protein_coding	0.683913	0.689253	0.71		0.565296	0.269152	0.82
POU6F1	red	protein_coding	0.828576	0.671453	0.66		0.863859	0.90944	0.62	41
LRFN2	red	protein_coding	0.442825	0.597965	0.69		0.311815	0.640111	0.65
LGALS9B	red	protein_coding	0.407673	0.495374	0.74		0.354101	0.140728	1.14
RNF165	red	protein_coding	0.595558	0.484368	0.73		0.561428	0.561007	0.71
ZNF117	red	protein_coding	0.701566	0.454537	1.3		0.637705	0.607532	1.38
FLT4	red	protein_coding	0.727183	0.427024	0.77		0.560414	0.861466	0.59
CLEC12A	red	protein_coding	0.52194	0.420514	1.22		0.328965	0.360477	1.23
SYNPO	red	protein_coding	0.729311	0.419907	0.8		0.647335	0.284606	0.82
ZNF462	red	protein_coding	0.448395	0.393486	0.77		0.407036	0.0140511	0.98
EVI2A	red	protein_coding	0.722308	0.244996	1.17		0.621011	0.605898	1.39
NLGN2	red	protein_coding	0.68355	0.207396	0.86		0.528804	0.485154	0.69
CLEC2B	red	protein_coding	0.74417	0.140486	1.13		0.721703	0.39559	1.33
SCN4A	red	protein_coding	0.594991	0.0851507	0.92		0.483828	0.238736	0.81

## Sheet: S file 1F
Supplementary file 1F – Over-representation pathway analysis of common modules. The table contains the top 10 enriched gene sets for each module, unless there were fewer or no gene sets passing the significance cutoff threshold of q-value < 0.05 for a given module. The number of genes in a given gene set are listed in ‘Gene set size’. ‘Overlap’ indicates the number of genes present in both the ge…
Module	Database	Gene set	q-value	Gene set size	Overlap	Fold Enrichment	Gene Overlap
Blue	BP GO	Neutrophil activation involved in immune response	3.24504e-19	584	53	4.9	PGLYRP1 SLC11A1 SERPINB1 SLC2A3 CEACAM1 CD59 PYGL MMP9 CRISPLD2 RETN SIGLEC5 FOLR3 MAPK14 VNN1 GCA QPCT CYSTM1 PLAU SLPI CHIT1 CKAP4 TLR2 ANXA3 GPR84 FCGR2A STOM FCER1G HK3 FCGR3B S100A11 S100A9 S100A12 CXCR1 GYG1 S100P CLEC4D FTH1 CEACAM3 FPR2 FPR1 LRG1 C3AR1 HSPA6 CXCR2 ADGRG3 MCEMP1 SELL CD55 CR1 CD177 ORM1 HP CLEC5A
Blue	BP GO	Reg. of inflammatory response	1.17562e-11	498	39	4.2	PGLYRP1 CST7 OSM NFKBIA MMP9 MAPK14 BCL6 IL1R1 IL1RL2 IL1B FFAR2 ALOX5AP EDNRB TLR4 TLR2 CASP5 ADCY3 GPR84 XCL1 FCGR2A PLA2G7 TAAR1 PTGES ADM S100A9 S100A12 NOD2 GPR27 FPR2 CEBPB NLRP6 NUPR1 FUT7 SOCS3 FFAR3 CNR2 LRRK2 SUCNR1 INSL3
Blue	BP GO	Response to bacterium	4.54223e-07	741	40	2.9	PGLYRP1 SLC11A1 IRAK3 NLRC4 PYGL NFKBIA SASH1 MAPK14 SOD2 GJB6 PTGFR SLPI IL1B CHIT1 EDNRB TLR4 TLR2 ANXA3 PTGES ADM LY96 ADAMTS5 FCER1G ALPL IL23R S100A9 S100A12 F2RL1 ABCA1 NOD2 FOS FPR2 LRG1 CEBPB TRIB1 NLRP6 TLR5 CNR2 CD55 HP
Blue	BP GO	Acute inflammatory response	6.57099e-08	127	17	7.2	OSM VNN1 FN1 TREM1 IL1B FFAR2 ALOX5AP EDNRB IL1RN PTGES CEBPB NUPR1 FUT7 CXCR2 FFAR3 ORM1 HP
Blue	BP GO	Pos. reg. of response to external stimulus	0.000115637	622	31	2.7	NLRC4 OSM NFKBIA TLR8 SASH1 IL18RAP IL1B FFAR2 NECTIN2 ALOX5AP TLR4 TLR2 XCL1 PLA2G7 LY96 FCER1G S100A9 S100A12 F2RL1 CLEC4E CLEC4D NOD2 FPR2 C3AR1 CEBPB NUPR1 CXCR2 FFAR3 LRRK2 SUCNR1 CLEC6A
Blue	BP GO	Pos. reg. of cytokine production	0.000277617	628	30	2.6	SLC11A1 IL4R NLRC4 OSM TLR8 MAPK14 IL1R1 IL1RL2 IL18R1 IL1B FFAR2 TLR4 TLR2 CYP1B1 XCL1 LY96 FCER1G AIRE IL23R F2RL1 NOD2 C3AR1 CEBPB FFAR3 TLR5 LRRK2 IL1RAP CD55 CLEC6A ORM1
Blue	BP GO	Response to mechanical stimulus	0.000371883	218	16	4	SLC1A3 NFKBIA TLR8 RETN MAPK14 IGFBP2 GADD45A KCNJ2 IL1B TLR4 KIAA0319 CASP5 FOS SLC8A1 TLR5 TIFAB
Blue	BP GO	Neg. reg. of response to external stimulus	0.000466862	581	28	2.6	PGLYRP1 CST7 CEACAM1 IRAK3 MAPK14 TNR DUSP1 PLAU KIAA0319 ADCY3 GPR84 FCGR2A TAAR1 ADM VSIG4 NBL1 NOD2 SEMA6B GPR27 FPR2 TRIB1 NLRP6 KREMEN1 SOCS3 CNR2 SERPINB2 CR1 INSL3
Blue	BP GO	Response to peptide	0.000686422	562	27	2.6	HDAC9 CEACAM1 NFKBIA MMP9 KLF5 RETN NAMPT GRB10 MAPK14 PRLR IGFBP2 IL1B KL SORT1 EDNRB TLR4 TLR2 ADCY3 ADM PID1 INHBB NOD2 FPR2 FUT7 SOCS3 FFAR3 IRS2
Blue	BP GO	Chemotaxis	0.000688681	699	31	2.4	ANOS1 NTN4 HSD3B7 GRB10 MAPK14 TNR DUSP1 PLAU FFAR2 DOCK4 EDNRB CMTM2 XCL1 PLA2G7 NBL1 FCER1G CXCL16 S100A9 S100A12 PROK2 CXCR1 F2RL1 NOD2 SEMA6B FPR2 FPR1 C3AR1 CXCR2 IRS2 CNR2 SUCNR1
Blue	KEGG	Cytokine-cytokine receptor interaction	0.00026065	294	19	3.5	IL4R OSM PRLR LIFR IL1R2 IL1R1 IL1RL2 IL18R1 IL18RAP IL1B IL1RN XCL1 CXCL16 IL23R INHBB CXCR1 TNFRSF10C CXCR2 IL1RAP
Blue	KEGG	Toll-like receptor signaling pathway	0.00094065	103	10	5.3	NFKBIA TLR8 MAP2K6 MAPK14 IL1B TLR4 TLR2 LY96 FOS TLR5
Blue	KEGG	TNF signaling pathway	0.00166962	112	10	4.8	NFKBIA MMP9 MAP2K6 MAPK14 IL18R1 IL1B NOD2 FOS CEBPB SOCS3
Blue	KEGG	Osteoclast differentiation	0.00395757	126	10	4.3	NFKBIA MAP2K6 MAPK14 IL1R1 IL1B FCGR2A NCF1 FCGR3B FOS SOCS3
Blue	KEGG	NF-kappa B signaling pathway	0.00396592	104	9	4.7	NFKBIA IL1R1 GADD45A TRIM25 PLAU IL1B TLR4 BCL2A1 LY96
Blue	KEGG	Th17 cell differentiation	0.00448632	108	9	4.5	IL4R NFKBIA MAPK14 IL1R1 IL1B RORC IL23R FOS IL1RAP
Blue	KEGG	Lipid and atherosclerosis	0.00448632	214	13	3.3	NFKBIA MMP9 MAP2K6 MAPK14 SOD2 IL1B TLR4 TLR2 LY96 NCF1 ABCA1 FOS HSPA6
Blue	KEGG	Neutrophil extracellular trap formation	0.00504597	190	12	3.4	HDAC9 TLR8 AQP9 MAPK14 TLR4 TLR2 FCGR2A NCF1 FCGR3B FPR2 FPR1 CR1
Blue	KEGG	Hematopoietic cell lineage	0.00985033	99	8	4.4	IL4R IL1R2 IL1R1 IL1B CD1C CD1E CD55 CR1
Blue	KEGG	Complement and coagulation cascades	0.0154677	84	7	4.5	PLAU VSIG4 C3AR1 CD55 SERPINB2 F5 CR1
Brown	BP GO	B cell activation	2.65829e-14	271	29	7.86911	CD79B CD22 TPD52 ITM2A BLNK CD40LG CD79A POU2AF1 CCR6 CR2 FLT3 LAX1 BLK LEF1 CD27 BANK1 MS4A1 TNFRSF13C CXCR5 FCRL1 CTLA4 IL7R GPR183 BCL2 RASGRP1 CD19 CD28 TNFRSF13B IGLL5
Brown	BP GO	B cell receptor signaling pathway	1.64294e-10	67	14	15.3656	CD79B CD22 BLNK CD79A PLEKHA1 ITK BLK MS4A1 CTLA4 BCL2 CD19 LCK PAX5 IGLL5
Brown	BP GO	T cell activation	9.19986e-08	574	30	3.84332	CD40LG CRTAM CCR6 ITK SLAMF1 LAX1 CCR7 BCL11B IL2RA DTX1 TESPA1 SIT1 LEF1 CD27 CAMK4 TNFRSF13C CD3G CTLA4 ICOS CD3D TMIGD2 IL7R GPR183 BCL2 CD8B RASGRP1 CD28 LCK BTLA DPP4
Brown	BP GO	Adaptive immune response	1.22615e-06	646	30	3.41496	CD79B TXK CD40LG FCER2 CD79A CRTAM BACH2 CCR6 ITK SLAMF1 CR2 LAX1 SIT1 LEF1 CD27 CAMK4 TNFRSF13C CD3G TRAT1 CTLA4 CD3D IL7R GPR183 CD8B RASGRP1 CD19 CD28 BTLA TNFRSF13B IGLL5
Brown	BP GO	Lymphocyte proliferation	3.71242e-06	357	21	4.32562	CD22 CD40LG CD79A CRTAM SLAMF1 CR2 FLT3 IL2RA BLK LEF1 MS4A1 TNFRSF13C CTLA4 TMIGD2 IL7R GPR183 BCL2 RASGRP1 CD19 CD28 TNFRSF13B
Brown	BP GO	Immune response-activating cell surface receptor signaling pathway	6.20685e-06	477	24	3.6999	CD79B CD22 TXK BLNK CD79A PLEKHA1 ITK CR2 LAX1 CCR7 TESPA1 BLK MS4A1 UBASH3A CD3G TRAT1 CTLA4 CD3D BCL2 CD19 CD28 LCK PAX5 IGLL5
Brown	BP GO	Reg. of B cell activation	2.25027e-05	130	12	6.78789	CD22 BLK CD27 BANK1 TNFRSF13C CTLA4 GPR183 BCL2 CD19 CD28 TNFRSF13B IGLL5
Brown	BP GO	Leukocyte cell-cell adhesion	2.25027e-05	445	22	3.63546	CD40LG CRTAM ADTRP SLAMF1 LAX1 CCR7 IL2RA ETS1 DTX1 TESPA1 LEF1 CD27 TNFRSF13C CTLA4 ICOS TMIGD2 IL7R RASGRP1 CD28 LCK BTLA DPP4
Brown	BP GO	Reg. of antigen receptor-mediated signaling pathway	3.50363e-05	69	9	9.59158	CD22 CCR7 TESPA1 BLK UBASH3A TRAT1 CD19 LCK PAX5
Brown	BP GO	Neuron projection morphogenesis	6.57963e-05	686	27	2.89425	LAMC2 SEMA3A NRCAM SYT17 FZD3 SEMA5A EPHA4 BCL11B CHL1 ZNF365 GDF7 ANK3 WNT7A PPP1R9A S100B ZSWIM5 CCDC141 APBB1 BCL2 PTPRM UGT8 RIMS2 AMIGO1 NOG PRKN DOK6 NEFL
Brown	KEGG	Hematopoietic cell lineage	1.2e-05	99	11	8.0923	CD22 FCER2 CR2 FLT3 IL2RA MS4A1 CD3G CD3D IL7R CD8B CD19
Brown	KEGG	Cytokine-cytokine receptor interaction	5.04e-05	294	17	4.2113	CD40LG CCR6 ACVR2B ACVR1C CCR7 IL2RA EDAR CD27 GDF7 EDA TNFRSF13C CXCR5 IL7R CCR8 CCR4 TNFRSF25 TNFRSF13B
Brown	KEGG	T cell receptor signaling pathway	8e-05	103	10	7.07094	CD40LG ITK CD3G CTLA4 ICOS CD3D CD8B RASGRP1 CD28 LCK
Brown	KEGG	NF-kappa B signaling pathway	0.00385649	104	8	5.60236	TRAF5 BLNK GADD45G EDAR EDA TNFRSF13C BCL2 LCK
Brown	KEGG	B cell receptor signaling pathway	0.00424468	81	7	6.29401	CD79B CD22 BLNK CD79A CR2 CD72 CD19
Brown	KEGG	Cell adhesion molecules	0.00507147	149	9	4.39917	CD22 NRCAM CD40LG CTLA4 ICOS CD8B PTPRM NECTIN3 CD28
Brown	KEGG	TGF-beta signaling pathway	0.0330425	93	6	4.69875	ACVR2B ACVR1C GDF7 ZFYVE9 RGMB NOG
Brown	KEGG	Signaling pathways regulating pluripotency of stem cells	0.0497074	143	7	3.56514	WNT16 FZD3 ACVR2B ACVR1C WNT7A AXIN2 POU5F1B
Black	BP GO	Adaptive immune response	8.59331e-05	646	13	6.6	RORA TBX21 CD8A MCOLN2 SLAMF6 EOMES ZNF683 PRF1 SH2D1A GZMM SH2D1B CD247 KLRK1
Black	BP GO	T cell activation	0.00229022	574	10	5.7	RUNX3 RORA TBX21 CD2 CD8A SLAMF6 EOMES ZNF683 TIGIT KLRK1
Black	BP GO	Lymphocyte mediated immunity	0.00243601	360	8	7.2	TBX21 CD8A SLAMF6 PRF1 SH2D1A GZMM SH2D1B KLRK1
Black	BP GO	Regulation of immune effector process	0.00748668	464	8	5.6	TBX21 FCRL3 SLAMF6 TLR3 ZNF683 SH2D1A SH2D1B KLRK1
Black	BP GO	Positive regulation of cell killing	0.0120712	93	4	14	SLAMF6 PRF1 SH2D1A KLRK1
Black	BP GO	T cell differentiation	0.000927862	281	8	9.3	RUNX3 RORA TBX21 CD2 CD8A SLAMF6 EOMES ZNF683
Black	BP GO	Alpha-beta T cell differentiation	0.000927862	119	6	16.4	RUNX3 RORA TBX21 SLAMF6 EOMES ZNF683
Black	BP GO	Lymphocyte differentiation	0.00121701	406	9	7.2	RUNX3 RORA TBX21 CD2 CD8A FCRL3 SLAMF6 EOMES ZNF683
Black	BP GO	Mononuclear cell differentiation	0.00243601	469	9	6.2	RUNX3 RORA TBX21 CD2 CD8A FCRL3 SLAMF6 EOMES ZNF683
Black	BP GO	Leukocyte differentiation	0.00259759	615	10	5.3	RUNX3 RORA TBX21 CD2 CD8A FCRL3 SLAMF6 EOMES TLR3 ZNF683
Black	KEGG	Regulation of cell killing	0.0485734	180	4	7.2	SLAMF6 PRF1 SH2D1A KLRK1
Black	KEGG	Natural killer cell mediated cytotoxicity	0.000241226	130	6	15	FASLG PRF1 SH2D1A SH2D1B CD247 KLRK1
Black	KEGG	Th1 and Th2 cell differentiation	0.000382302	92	5	17.7	RUNX3 TBX21 IL2RB STAT4 CD247
Black	KEGG	Th17 cell differentiation	0.0092736	108	4	12.1	RORA TBX21 IL2RB CD247
Black	KEGG	Cell adhesion molecules	0.0186315	149	4	8.7	CD2 NCAM1 CD8A TIGIT
Red	BP GO	T cell activation	0.000681146	574	16	4.70688	CD6 TCF7 SIRPG NFATC2 GATA3 CD5 ZAP70 ARG1 LY9 ANXA1 NLRC3 CD7 CARD11 CD3E LAT
Red	BP GO	T cell selection	0.00621473	52	5	16.2365	GATA3 ZAP70 LY9 CARD11 CD3E
Red	BP GO	Cellular response to interleukin-4	0.0111915	33	4	20.4678	TCF7 GATA3 ARG1 IL24
Red	BP GO	Pos. reg. of T cell activation	0.0111915	280	9	5.42762	CD6 SIRPG GATA3 CD5 ZAP70 ANXA1 CARD11 CD3E
Red	BP GO	Pos. reg. of cell adhesion	0.0227883	516	11	3.59971	ITGA3 CD6 SIRPG GATA3 SPOCK2 CD5 ZAP70 ANXA1 CARD11 CD3E
Red	BP GO	Pos. reg. of programmed cell death	0.0308633	640	12	3.16611	MAP3K9 LTK ARG1 PLCG1 MCF2L ANXA1 BIN1 S100A8 OBSCN PLEKHG5 CD248 PNMA3
Red	BP GO	Reg. of plasma membrane bounded cell projection organization	0.030995	644	12	3.14645	ITGA3 HGF CROCC LTK NEDD4 GATA3 PLXNA1 AUTS2 CARMIL2 EVL PLXNA4 PRAG1
Red	BP GO	Phosphatidylinositol 3-kinase signaling	0.0328609	170	6	5.95974	HGF LTK NEDD4 GATA3 PIK3C2B NLRC3
Red	BP GO	T cell costimulation	0.0335037	64	4	10.5537	CD5 CARD11 CD3E
Red	BP GO	Interleukin-2 production	0.0364235	67	4	10.0811	GATA3 ANXA1 CARD11 CD3E
Red	KEGG	Th17 cell differentiation	0.000592749	108	7	10.9446	NFATC2 IL21R GATA3 ZAP70 PLCG1 CD3E LAT
Red	KEGG	Th1 and Th2 cell differentiation	0.00144976	92	6	11.0126	NFATC2 GATA3 ZAP70 PLCG1 CD3E LAT
Red	KEGG	T cell receptor signaling pathway	0.00183769	103	6	9.83646	NFATC2 ZAP70 PLCG1 CARD11 CD3E LAT
Red	KEGG	Hematopoietic cell lineage	0.00990965	99	5	8.52825	ITGA3 CD5 IL11RA CD7 CD3E

## Sheet: S file 1G
Supplementary file 1G – Differential expression analysis for whole transcriptome between death (n=34) and survival (n=172) in HIV-negative TBM in the study. Positive log fold change (logFC) indicates higher expression, while negative logFC indicates lower expression in death TBM. Two case were excluded from this analysis due to follow-up time were less than 3 months. Linear models were used to as…
Gene symbol	Ensembl ID	Gene type	logFC	P.Value	adj.P.Val	B-statistic
AGFG1	ENSG00000173744	protein_coding	0.692961	1.28887e-09	1.06778e-05	11.4934
FCGBP	ENSG00000275395	protein_coding	-1.20698	1.60168e-09	1.06778e-05	11.291
RPL7P12	ENSG00000227770	processed_pseudogene	0.87718	9.84972e-10	1.06778e-05	11.744
AP003086.1	ENSG00000254420	lncRNA	1.14791	3.06855e-09	1.22742e-05	10.6854
SAMSN1	ENSG00000155307	protein_coding	1.09559	2.47405e-09	1.22742e-05	10.886
AC105339.4	ENSG00000259707	processed_pseudogene	0.886662	7.55395e-09	2.2452e-05	9.84708
TDRD9	ENSG00000156414	protein_coding	1.19457	7.8582e-09	2.2452e-05	9.81036
AC009303.4	ENSG00000279227	TEC	0.731641	1.21887e-08	2.7086e-05	9.40221
TNFAIP8L3	ENSG00000183578	protein_coding	1.10961	1.11468e-08	2.7086e-05	9.48528
CSGALNACT2	ENSG00000169826	protein_coding	0.733409	1.5992e-08	2.83673e-05	9.1498
FCER1G	ENSG00000158869	protein_coding	0.903841	1.70204e-08	2.83673e-05	9.09189
MCEMP1	ENSG00000183019	protein_coding	1.30131	1.59638e-08	2.83673e-05	9.15144
CD63	ENSG00000135404	protein_coding	0.645867	2.94217e-08	4.2031e-05	8.58353
DRAM1	ENSG00000136048	protein_coding	0.636508	2.79741e-08	4.2031e-05	8.63038
GYG1	ENSG00000163754	protein_coding	0.905197	3.55493e-08	4.73991e-05	8.4079
TESPA1	ENSG00000135426	protein_coding	-0.865638	5.54609e-08	6.93261e-05	7.99522
OMG	ENSG00000126861	protein_coding	0.601692	7.22973e-08	8.50557e-05	7.74937
KLF14	ENSG00000266265	protein_coding	1.18861	8.93621e-08	9.40653e-05	7.55293
TP53I3	ENSG00000115129	protein_coding	0.57683	8.72736e-08	9.40653e-05	7.57485
AC084398.2	ENSG00000257202	lncRNA	0.535421	1.18551e-07	0.000107615	7.29103
ADAM9	ENSG00000168615	protein_coding	0.626707	1.23758e-07	0.000107615	7.25121
RD3L	ENSG00000227729	protein_coding	0.920117	1.22021e-07	0.000107615	7.26431
SPTLC2	ENSG00000100596	protein_coding	0.560198	1.15623e-07	0.000107615	7.3142
ARL4AP2	ENSG00000248780	processed_pseudogene	0.760104	1.46713e-07	0.000122261	7.09362
AC092681.2	ENSG00000260555	lncRNA	-0.810443	1.60116e-07	0.000127787	7.01268
SH3GLB1	ENSG00000097033	protein_coding	0.681028	1.66123e-07	0.000127787	6.97858
NECAB1	ENSG00000123119	protein_coding	1.14612	1.77364e-07	0.000131381	6.91797
NLRC4	ENSG00000091106	protein_coding	0.820853	1.94042e-07	0.000138602	6.83478
AC098935.1	ENSG00000226945	processed_pseudogene	-0.845732	2.07704e-07	0.000139178	6.77181
CYP1B1-AS1	ENSG00000232973	lncRNA	0.925589	2.16092e-07	0.000139178	6.73518
RPL7P24	ENSG00000240003	processed_pseudogene	0.638162	2.10049e-07	0.000139178	6.76142
S100A12	ENSG00000163221	protein_coding	1.29093	2.22685e-07	0.000139178	6.70737
AC093642.1	ENSG00000226423	lncRNA	-0.686465	2.72395e-07	0.000150692	6.52097
ANTXRLP1	ENSG00000263482	unprocessed_pseudogene	-0.853551	2.78781e-07	0.000150692	6.49954
CYP19A1	ENSG00000137869	protein_coding	1.17041	2.61125e-07	0.000150692	6.56005
NAIP	ENSG00000249437	protein_coding	0.912165	2.48687e-07	0.000150692	6.6052
TSPO	ENSG00000100300	protein_coding	0.62415	2.76962e-07	0.000150692	6.50559
LILRA5	ENSG00000187116	protein_coding	0.882189	2.94476e-07	0.000154987	6.44888
AL049597.2	ENSG00000261737	lncRNA	0.672016	3.32912e-07	0.000155378	6.33545
CYSTM1	ENSG00000120306	protein_coding	0.944131	3.38366e-07	0.000155378	6.32042
EPHX2	ENSG00000120915	protein_coding	-0.772921	3.41997e-07	0.000155378	6.31056
S100A6	ENSG00000197956	protein_coding	0.543214	3.30907e-07	0.000155378	6.34103
S100A9	ENSG00000163220	protein_coding	0.976462	3.19831e-07	0.000155378	6.37251
SERPINB1	ENSG00000021355	protein_coding	0.71133	3.49601e-07	0.000155378	6.29023
TRAJ26	ENSG00000211863	TR_J_gene	-0.825718	3.24731e-07	0.000155378	6.35845
CD177	ENSG00000204936	protein_coding	2.19484	3.66e-07	0.0001569	6.24785
LDHA	ENSG00000134333	protein_coding	0.623956	3.68716e-07	0.0001569	6.24102
AC097376.2	ENSG00000248863	transcribed_processed_pseudogene	0.549679	4.25553e-07	0.000173695	6.10852
AP001042.1	ENSG00000205622	lncRNA	0.641443	4.2247e-07	0.000173695	6.11524
AC004918.5	ENSG00000270157	lncRNA	-0.667716	5.03509e-07	0.00017596	5.95312
AC009229.3	ENSG00000273006	lncRNA	0.835121	4.44994e-07	0.00017596	6.06725
AC064853.2	ENSG00000285843	polymorphic_pseudogene	0.648619	5.07239e-07	0.00017596	5.9463
AC136297.1	ENSG00000287935	lncRNA	0.699557	4.66391e-07	0.00017596	6.02386
CD55	ENSG00000196352	protein_coding	0.820751	4.8826e-07	0.00017596	5.98153
DDAH2	ENSG00000213722	protein_coding	0.680296	4.59236e-07	0.00017596	6.03814
GPR150	ENSG00000178015	protein_coding	-0.630082	4.77852e-07	0.00017596	6.00143
KL	ENSG00000133116	protein_coding	0.902465	5.10283e-07	0.00017596	5.94077
KLHL3	ENSG00000146021	protein_coding	-0.748367	5.06084e-07	0.00017596	5.94841
AC009229.4	ENSG00000280276	TEC	0.813777	5.2258e-07	0.000177146	5.91878
TMEM169	ENSG00000163449	protein_coding	0.569774	5.37647e-07	0.000179216	5.89253
EVL	ENSG00000196405	protein_coding	-0.73074	6.2974e-07	0.000197867	5.74653
GALNT12	ENSG00000119514	protein_coding	-0.646232	6.38068e-07	0.000197867	5.7344
PRSS1	ENSG00000204983	protein_coding	-0.734253	6.31802e-07	0.000197867	5.74351
TRAJ24	ENSG00000211865	TR_J_gene	-0.802404	6.43069e-07	0.000197867	5.7272
ZNF793	ENSG00000188227	protein_coding	-0.736429	6.17853e-07	0.000197867	5.76413
AC008555.2	ENSG00000269086	lncRNA	-0.853019	6.59386e-07	0.000199071	5.70406
AC023830.3	ENSG00000278434	lncRNA	-0.53293	6.66887e-07	0.000199071	5.69362
HGF	ENSG00000019991	protein_coding	0.827124	6.91317e-07	0.000203329	5.66041
IL18R1	ENSG00000115604	protein_coding	1.33519	7.09027e-07	0.00020471	5.63706
ZNF438	ENSG00000183621	protein_coding	0.742005	7.16486e-07	0.00020471	5.62741
AC007278.2	ENSG00000236525	lncRNA	1.21358	7.5549e-07	0.000207058	5.57848
AC078889.1	ENSG00000256072	lncRNA	0.820238	7.4079e-07	0.000207058	5.59662
EXOSC4	ENSG00000178896	protein_coding	0.582797	7.66114e-07	0.000207058	5.5656
Z84492.1	ENSG00000271858	lncRNA	-0.499495	7.65362e-07	0.000207058	5.5665
AC103563.7	ENSG00000233850	lncRNA	-0.869063	7.84488e-07	0.000209197	5.54373
KLHL8	ENSG00000145332	protein_coding	0.624827	8.20329e-07	0.000214869	5.50251
RAB32	ENSG00000118508	protein_coding	0.640109	8.27246e-07	0.000214869	5.49476
RNF175	ENSG00000145428	protein_coding	0.842855	8.6569e-07	0.000221972	5.45285
SQOR	ENSG00000137767	protein_coding	0.624431	8.77647e-07	0.000222189	5.4402
AC093673.1	ENSG00000232533	lncRNA	0.576618	9.19017e-07	0.000229754	5.39771
IRAK3	ENSG00000090376	protein_coding	0.85766	9.48321e-07	0.000234153	5.36876
ALS2CL	ENSG00000178038	protein_coding	-0.746084	9.86515e-07	0.000240613	5.33234
ETS2	ENSG00000157557	protein_coding	0.711774	1.0013e-06	0.000241277	5.31862
FLOT1	ENSG00000137312	protein_coding	0.696723	1.02243e-06	0.000243435	5.29937
IL1R2	ENSG00000115590	protein_coding	1.36997	1.04456e-06	0.000244468	5.27962
MAPK14	ENSG00000112062	protein_coding	0.741389	1.05121e-06	0.000244468	5.27376
BCL11B	ENSG00000127152	protein_coding	-0.831025	1.07609e-06	0.000244566	5.2522
RFTN1	ENSG00000131378	protein_coding	-0.526556	1.0713e-06	0.000244566	5.25631
IL18RAP	ENSG00000115607	protein_coding	1.21852	1.11982e-06	0.000249471	5.21547
ZNF599	ENSG00000153896	protein_coding	-0.49616	1.12262e-06	0.000249471	5.21317
AL109767.1	ENSG00000235785	lncRNA	-0.786448	1.1923e-06	0.000250595	5.15766
AL359962.2	ENSG00000273160	lncRNA	-0.714894	1.16041e-06	0.000250595	5.18265
ASPH	ENSG00000198363	protein_coding	0.853834	1.17191e-06	0.000250595	5.17356
CNIH4	ENSG00000143771	protein_coding	0.550022	1.19019e-06	0.000250595	5.15929
IGFBP3	ENSG00000146674	protein_coding	-0.778062	1.20286e-06	0.000250595	5.14953
SIDT1	ENSG00000072858	protein_coding	-0.637965	1.16375e-06	0.000250595	5.17999
HP	ENSG00000257017	protein_coding	1.34095	1.22182e-06	0.000251922	5.13511
SFXN2	ENSG00000156398	protein_coding	-0.656752	1.23831e-06	0.000252715	5.12276
NLRC3	ENSG00000167984	protein_coding	-0.696742	1.25365e-06	0.000253263	5.11141
ABLIM1	ENSG00000099204	protein_coding	-0.697305	1.31864e-06	0.000253585	5.06483
CD6	ENSG00000013725	protein_coding	-0.905355	1.30523e-06	0.000253585	5.07425
DEGS2	ENSG00000168350	protein_coding	-0.729243	1.31802e-06	0.000253585	5.06526
NSUN5P2	ENSG00000106133	transcribed_unprocessed_pseudogene	-0.548416	1.31267e-06	0.000253585	5.06901
PFKFB2	ENSG00000123836	protein_coding	1.08518	1.28137e-06	0.000253585	5.09125
SDHAP3	ENSG00000185986	transcribed_unprocessed_pseudogene	-0.591924	1.35554e-06	0.000258199	5.03939
ITPKC	ENSG00000086544	protein_coding	0.629828	1.39704e-06	0.000258711	5.01161
TRBJ1-5	ENSG00000282173	TR_J_gene	-0.698258	1.37247e-06	0.000258711	5.02796
ZAP70	ENSG00000115085	protein_coding	-0.783036	1.3947e-06	0.000258711	5.01315
B3GNT5	ENSG00000176597	protein_coding	0.679154	1.4862e-06	0.000259409	4.9546
EXD3	ENSG00000187609	protein_coding	-0.507755	1.47898e-06	0.000259409	4.95909
FKBP5	ENSG00000096060	protein_coding	0.984142	1.47857e-06	0.000259409	4.95935
OLAH	ENSG00000152463	protein_coding	1.82932	1.4916e-06	0.000259409	4.95126
OPLAH	ENSG00000178814	protein_coding	0.902875	1.43904e-06	0.000259409	4.98432
SKAP1	ENSG00000141293	protein_coding	-0.617952	1.48751e-06	0.000259409	4.9538
TLR5	ENSG00000187554	protein_coding	0.858718	1.42159e-06	0.000259409	4.99555
AC073115.2	ENSG00000237471	lncRNA	-0.682992	1.54112e-06	0.000259781	4.92118
BAZ1A	ENSG00000198604	protein_coding	0.625758	1.52068e-06	0.000259781	4.93348
FMNL3	ENSG00000161791	protein_coding	-0.652574	1.5457e-06	0.000259781	4.91845
IFNGR1	ENSG00000027697	protein_coding	0.659122	1.53181e-06	0.000259781	4.92676
AC007278.1	ENSG00000234389	lncRNA	1.24572	1.68218e-06	0.000275767	4.84051
GOLGA7B	ENSG00000155265	protein_coding	-0.698988	1.67794e-06	0.000275767	4.84283
UBASH3A	ENSG00000160185	protein_coding	-0.814568	1.67448e-06	0.000275767	4.84473
UPP1	ENSG00000183696	protein_coding	0.719972	1.70584e-06	0.000277372	4.82765
AC004890.2	ENSG00000244560	transcribed_unprocessed_pseudogene	-0.644577	1.76868e-06	0.000281755	4.79434
AC022762.2	ENSG00000267940	lncRNA	0.517399	1.79794e-06	0.000281755	4.77923
AC133065.1	ENSG00000262151	lncRNA	-0.617006	1.76775e-06	0.000281755	4.79482
CYP1B1	ENSG00000138061	protein_coding	0.843337	1.8314e-06	0.000281755	4.76225
FCAR	ENSG00000186431	protein_coding	0.814278	1.78917e-06	0.000281755	4.78373
MICAL3	ENSG00000243156	protein_coding	-0.536882	1.81211e-06	0.000281755	4.772
PPP1R3D	ENSG00000132825	protein_coding	0.580238	1.82359e-06	0.000281755	4.76618
AC009229.2	ENSG00000229160	lncRNA	0.749277	1.94434e-06	0.000283161	4.70715
AL034397.3	ENSG00000274536	lncRNA	0.668684	2.09539e-06	0.000283161	4.63829
AL157935.2	ENSG00000227218	lncRNA	-0.76422	2.04476e-06	0.000283161	4.6608
ANXA3	ENSG00000138772	protein_coding	1.19148	1.90733e-06	0.000283161	4.72484
C3orf18	ENSG00000088543	protein_coding	-0.575863	2.07459e-06	0.000283161	4.64747
CCNG1P1	ENSG00000218991	processed_pseudogene	1.12356	2.0953e-06	0.000283161	4.63832
DBP	ENSG00000105516	protein_coding	-0.530346	1.947e-06	0.000283161	4.7059
DDX10P1	ENSG00000237135	processed_pseudogene	0.904048	1.89653e-06	0.000283161	4.73008
ENOSF1	ENSG00000132199	protein_coding	-0.661269	1.9665e-06	0.000283161	4.69672
HAUS5	ENSG00000249115	protein_coding	-0.600511	2.08327e-06	0.000283161	4.64362
KLHL2	ENSG00000109466	protein_coding	0.773409	2.0736e-06	0.000283161	4.64791
MXRA8	ENSG00000162576	protein_coding	-0.629176	2.01669e-06	0.000283161	4.67352
PCED1B	ENSG00000179715	protein_coding	-0.735122	1.98127e-06	0.000283161	4.68983
PLCG1	ENSG00000124181	protein_coding	-0.736789	1.8894e-06	0.000283161	4.73354
TRABD2A	ENSG00000186854	protein_coding	-0.934631	2.08884e-06	0.000283161	4.64117
TRBJ2-3	ENSG00000211767	TR_J_gene	-0.632748	2.07906e-06	0.000283161	4.64549
VNN1	ENSG00000112299	protein_coding	1.3288	2.07572e-06	0.000283161	4.64697
ZC3H12D	ENSG00000178199	protein_coding	-0.592102	1.96013e-06	0.000283161	4.69971
AC093010.1	ENSG00000240487	processed_pseudogene	-0.664666	2.18041e-06	0.000285987	4.60168
AL137789.1	ENSG00000236911	lncRNA	0.893022	2.2307e-06	0.000285987	4.5807
CLCA4-AS1	ENSG00000236915	lncRNA	0.633663	2.18034e-06	0.000285987	4.60171
GRAP	ENSG00000154016	protein_coding	-0.598827	2.19699e-06	0.000285987	4.59471
MIR151B	ENSG00000265154	miRNA	-0.661251	2.14366e-06	0.000285987	4.61732
PLP2	ENSG00000102007	protein_coding	0.554881	2.22523e-06	0.000285987	4.58295
RPS27AP9	ENSG00000242706	processed_pseudogene	0.560517	2.16493e-06	0.000285987	4.60824
STK3	ENSG00000104375	protein_coding	0.631627	2.22796e-06	0.000285987	4.58183
AC116021.1	ENSG00000254639	lncRNA	0.604834	2.33495e-06	0.000297445	4.53867
PGD	ENSG00000142657	protein_coding	0.673109	2.35398e-06	0.000297972	4.5312
AC020703.1	ENSG00000249309	lncRNA	0.888914	2.42713e-06	0.000298146	4.50304
AC127521.1	ENSG00000262823	lncRNA	-0.748703	2.40975e-06	0.000298146	4.50966
IER3	ENSG00000137331	protein_coding	0.610271	2.42989e-06	0.000298146	4.502
METTL9	ENSG00000197006	protein_coding	0.621374	2.39044e-06	0.000298146	4.51706
TRBJ1-6	ENSG00000282780	TR_J_gene	-0.686003	2.42269e-06	0.000298146	4.50473
PRDM11	ENSG00000019485	protein_coding	-0.558691	2.46035e-06	0.000300043	4.49054
PHTF1	ENSG00000116793	protein_coding	0.62862	2.47788e-06	0.00030035	4.484
IL9RP3	ENSG00000226942	unprocessed_pseudogene	-0.56882	2.53247e-06	0.000305117	4.46396
ST6GALNAC3	ENSG00000184005	protein_coding	0.702771	2.57622e-06	0.000307702	4.44821
TNFRSF25	ENSG00000215788	protein_coding	-0.79382	2.5847e-06	0.000307702	4.44518
TSPYL2	ENSG00000184205	protein_coding	-0.565018	2.64358e-06	0.00031285	4.42446
PLD4	ENSG00000166428	protein_coding	-0.934151	2.74434e-06	0.000322863	4.39006
AC005632.3	ENSG00000261596	lncRNA	0.657132	2.84108e-06	0.00033229	4.3582
AP003170.3	ENSG00000256452	lncRNA	-0.567198	2.88665e-06	0.000334682	4.34357
WDFY3	ENSG00000163625	protein_coding	0.684199	2.895e-06	0.000334682	4.34091
H4P1	ENSG00000240680	processed_pseudogene	0.684316	2.94319e-06	0.000336365	4.32573
HTATIP2	ENSG00000109854	protein_coding	0.531231	2.9334e-06	0.000336365	4.3288
GPAT3	ENSG00000138678	protein_coding	0.666565	3.15498e-06	0.00035852	4.26185
ATP6V0E2	ENSG00000171130	protein_coding	-0.582206	3.41029e-06	0.000363544	4.19032
BCAS4	ENSG00000124243	protein_coding	-0.6406	3.37543e-06	0.000363544	4.19976
CDHR3	ENSG00000128536	protein_coding	-0.793411	3.31676e-06	0.000363544	4.21588
FAM86C1	ENSG00000158483	protein_coding	-0.5261	3.32345e-06	0.000363544	4.21403
HLFP1	ENSG00000218194	processed_pseudogene	0.70145	3.44882e-06	0.000363544	4.17999
LINC02731	ENSG00000204241	lncRNA	-0.607806	3.22133e-06	0.000363544	4.24271
NEDD4	ENSG00000069869	protein_coding	0.639474	3.30846e-06	0.000363544	4.21818
OLFM2	ENSG00000105088	protein_coding	-0.616985	3.27348e-06	0.000363544	4.22795
RALGAPA2	ENSG00000188559	protein_coding	0.615716	3.37747e-06	0.000363544	4.19921
RBMS1P1	ENSG00000225422	processed_pseudogene	0.847778	3.45367e-06	0.000363544	4.1787
SDCBP	ENSG00000137575	protein_coding	0.635998	3.39653e-06	0.000363544	4.19404
SEMA4F	ENSG00000135622	protein_coding	-0.578656	3.42341e-06	0.000363544	4.18679
TRAF5	ENSG00000082512	protein_coding	-0.629893	3.38239e-06	0.000363544	4.19787
UGCG	ENSG00000148154	protein_coding	0.788749	3.45113e-06	0.000363544	4.17938
AC040160.1	ENSG00000196155	protein_coding	-0.594429	3.57861e-06	0.000366838	4.14604
CARD6	ENSG00000132357	protein_coding	0.503088	3.61336e-06	0.000366838	4.13716
CDS1	ENSG00000163624	protein_coding	0.714694	3.52533e-06	0.000366838	4.15983
DENND11	ENSG00000257093	protein_coding	-0.598082	3.5197e-06	0.000366838	4.1613
FAM151B	ENSG00000152380	protein_coding	0.532687	3.60303e-06	0.000366838	4.13979
MAN1C1	ENSG00000117643	protein_coding	-0.664917	3.60434e-06	0.000366838	4.13946
STMN3	ENSG00000197457	protein_coding	-0.553419	3.58786e-06	0.000366838	4.14367
SULT1B1	ENSG00000173597	protein_coding	0.742696	3.66808e-06	0.000368651	4.12335
U62631.1	ENSG00000269553	lncRNA	-0.801793	3.65936e-06	0.000368651	4.12554
TMEM260	ENSG00000070269	protein_coding	0.537722	3.70677e-06	0.000370677	4.11371
CENPV	ENSG00000166582	protein_coding	-0.568764	3.75394e-06	0.000373526	4.10209
SNED1	ENSG00000162804	protein_coding	-0.563022	3.81444e-06	0.000377667	4.08741
ERLIN1	ENSG00000107566	protein_coding	0.735406	3.893e-06	0.000382156	4.06868
TLR2	ENSG00000137462	protein_coding	0.727423	3.89799e-06	0.000382156	4.0675
IL11RA	ENSG00000137070	protein_coding	-0.633687	3.93368e-06	0.000383774	4.05912
AL133517.1	ENSG00000232450	transcribed_processed_pseudogene	0.666535	4.02806e-06	0.000389184	4.03735
MIR29A	ENSG00000284032	miRNA	0.540297	4.02041e-06	0.000389184	4.03909
FAM102A	ENSG00000167106	protein_coding	-0.967739	4.07267e-06	0.000389729	4.02723
NFKBIA	ENSG00000100906	protein_coding	0.644053	4.06859e-06	0.000389729	4.02815
ACVR1B	ENSG00000135503	protein_coding	0.560497	4.23525e-06	0.000397777	3.99127
IL21R	ENSG00000103522	protein_coding	-0.666567	4.23549e-06	0.000397777	3.99122
RNU6-917P	ENSG00000252103	snRNA	0.541124	4.23633e-06	0.000397777	3.99104
TRBV29-1	ENSG00000232869	TR_V_gene	-0.828485	4.18222e-06	0.000397777	4.00285
CASP4	ENSG00000196954	protein_coding	0.586167	4.40244e-06	0.000409529	3.95572
TRIQK	ENSG00000205133	protein_coding	0.599606	4.3895e-06	0.000409529	3.95842
FCMR	ENSG00000162894	protein_coding	-0.774409	4.4639e-06	0.000411419	3.94299
HAPLN3	ENSG00000140511	protein_coding	-0.691656	4.46363e-06	0.000411419	3.94304
SLA	ENSG00000155926	protein_coding	0.601451	4.4906e-06	0.000411982	3.93751
AC009432.2	ENSG00000287950	lncRNA	0.669021	4.65012e-06	0.000414035	3.90546
AC096564.1	ENSG00000245293	lncRNA	0.586444	4.65789e-06	0.000414035	3.90393
ATP11AUN	ENSG00000197595	lncRNA	0.496577	4.56266e-06	0.000414035	3.92289
CD58	ENSG00000116815	protein_coding	0.494502	4.61572e-06	0.000414035	3.91228
HMGB2	ENSG00000164104	protein_coding	0.720434	4.64532e-06	0.000414035	3.90641
SDR42E1P5	ENSG00000236785	processed_pseudogene	1.01153	4.55316e-06	0.000414035	3.92481
SEPTIN1	ENSG00000180096	protein_coding	-0.544096	4.6177e-06	0.000414035	3.91188
SAMD15	ENSG00000100583	protein_coding	0.575964	4.72274e-06	0.000417942	3.89123
TRBJ2-7	ENSG00000211771	TR_J_gene	-0.706062	4.7484e-06	0.000418361	3.88626
AC097376.3	ENSG00000273247	lncRNA	0.511549	4.82467e-06	0.000421908	3.87163
NOG	ENSG00000183691	protein_coding	-1.00567	4.84618e-06	0.000421908	3.86754
OR10AE3P	ENSG00000272837	unprocessed_pseudogene	0.615782	4.85194e-06	0.000421908	3.86645
LLGL2	ENSG00000073350	protein_coding	-0.598535	4.89915e-06	0.000424169	3.85756
AC092916.2	ENSG00000240787	processed_pseudogene	-0.66766	4.93859e-06	0.000424194	3.8502
KLF7-IT1	ENSG00000237892	lncRNA	0.538714	4.96307e-06	0.000424194	3.84566
SCART1	ENSG00000214279	protein_coding	-0.803947	4.954e-06	0.000424194	3.84734
MAPK6P3	ENSG00000237263	processed_pseudogene	0.846432	5.04316e-06	0.000429205	3.83097
AC114878.2	ENSG00000270911	processed_pseudogene	0.570797	5.10201e-06	0.000430549	3.82032
EXT1	ENSG00000182197	protein_coding	0.519418	5.08279e-06	0.000430549	3.82378
CPEB4	ENSG00000113742	protein_coding	0.53364	5.13507e-06	0.000431519	3.81439
FPR1	ENSG00000171051	protein_coding	0.712133	5.21191e-06	0.000436143	3.80076
AF178030.1	ENSG00000227170	lncRNA	0.569293	5.25311e-06	0.000436225	3.79353
VWA8-AS1	ENSG00000278338	lncRNA	0.778183	5.25652e-06	0.000436225	3.79294
TRBV7-9	ENSG00000278030	TR_V_gene	-0.801867	5.36033e-06	0.00044118	3.77499
ZNF70	ENSG00000187792	protein_coding	-0.532819	5.35104e-06	0.00044118	3.77658
ARVCF	ENSG00000099889	protein_coding	-0.555217	5.46518e-06	0.000447966	3.75721
FUT2	ENSG00000176920	protein_coding	-0.592849	5.51575e-06	0.000450265	3.74876
CTSF	ENSG00000174080	protein_coding	-0.600569	5.56092e-06	0.000450277	3.74127
RTKN	ENSG00000114993	protein_coding	-0.522676	5.56026e-06	0.000450277	3.74138
AL606491.1	ENSG00000225643	lncRNA	-0.622353	5.6583e-06	0.000456314	3.72534
FAM66C	ENSG00000226711	lncRNA	-0.510681	5.735e-06	0.0004588	3.71299
GATA3	ENSG00000107485	protein_coding	-0.649952	5.73029e-06	0.0004588	3.71374
NFIL3	ENSG00000165030	protein_coding	0.657646	5.79706e-06	0.000460084	3.70311
TLR4	ENSG00000136869	protein_coding	0.678748	5.78929e-06	0.000460084	3.70435
TRAJ1	ENSG00000211888	TR_J_gene	-0.696695	5.82286e-06	0.000460305	3.69904
TRAJ18	ENSG00000211871	TR_J_gene	-0.764729	5.86227e-06	0.000461596	3.69285
RN7SKP97	ENSG00000222898	misc_RNA	0.739371	5.94583e-06	0.000464518	3.67987
SHISAL2A	ENSG00000182183	protein_coding	-0.681903	5.94278e-06	0.000464518	3.68034
AC079760.2	ENSG00000243144	lncRNA	0.909723	6.09703e-06	0.000470813	3.65683
NELL2	ENSG00000184613	protein_coding	-1.09291	6.09207e-06	0.000470813	3.65758
SIPA1L2	ENSG00000116991	protein_coding	0.87305	6.05263e-06	0.000470813	3.66354
AC018755.5	ENSG00000286236	lncRNA	0.73923	6.15533e-06	0.000473487	3.6481
ARL11	ENSG00000152213	protein_coding	0.498796	6.25578e-06	0.000475725	3.63325
PLBD1	ENSG00000121316	protein_coding	0.701442	6.22157e-06	0.000475725	3.63828
SPOCK2	ENSG00000107742	protein_coding	-0.680625	6.24066e-06	0.000475725	3.63547
B3GNT2	ENSG00000170340	protein_coding	0.532283	6.32607e-06	0.000479248	3.623
EIF4E2P1	ENSG00000213384	processed_pseudogene	0.66777	6.37789e-06	0.00048135	3.61552
CARD11-AS1	ENSG00000237286	lncRNA	-0.59174	6.40279e-06	0.000481413	3.61195
SGMS2	ENSG00000164023	protein_coding	0.638706	6.43202e-06	0.000481565	3.60777
TRAV3	ENSG00000211777	TR_V_gene	-0.745723	6.45297e-06	0.000481565	3.60479
FGD4	ENSG00000139132	protein_coding	0.582291	6.50503e-06	0.000483645	3.59742
ESYT1	ENSG00000139641	protein_coding	-0.532349	6.5468e-06	0.000484948	3.59155
HK3	ENSG00000160883	protein_coding	0.661532	6.60186e-06	0.000487222	3.58387
AC122718.1	ENSG00000250461	processed_pseudogene	0.478883	6.7279e-06	0.000492886	3.56652
ACSL4	ENSG00000068366	protein_coding	0.596525	6.70697e-06	0.000492886	3.56938
KCNH7	ENSG00000184611	protein_coding	1.01615	6.76907e-06	0.000494093	3.56093
AXIN2	ENSG00000168646	protein_coding	-0.74104	7.04953e-06	0.000511243	3.5237
SLC1A3	ENSG00000079215	protein_coding	1.01373	7.05515e-06	0.000511243	3.52297
GADD45A	ENSG00000116717	protein_coding	0.805409	7.15277e-06	0.000514588	3.51037
NACAP8	ENSG00000257210	processed_pseudogene	0.655451	7.14124e-06	0.000514588	3.51185
PDCL3P7	ENSG00000256777	processed_pseudogene	0.569482	7.26332e-06	0.000519151	3.49631
PYGL	ENSG00000100504	protein_coding	0.745885	7.26812e-06	0.000519151	3.49571
AC009229.1	ENSG00000227292	lncRNA	0.598514	7.53081e-06	0.000521163	3.46316
AL033519.5	ENSG00000287458	lncRNA	0.956267	7.52675e-06	0.000521163	3.46365
ARHGAP29	ENSG00000137962	protein_coding	0.725399	7.37759e-06	0.000521163	3.482
BACH2	ENSG00000112182	protein_coding	-0.83382	7.45135e-06	0.000521163	3.47288
BRI3	ENSG00000164713	protein_coding	0.508574	7.36473e-06	0.000521163	3.4836
MAP2K6	ENSG00000108984	protein_coding	0.688004	7.39618e-06	0.000521163	3.47969
MYO10	ENSG00000145555	protein_coding	0.960624	7.48561e-06	0.000521163	3.46868
SMYD5	ENSG00000135632	protein_coding	-0.557846	7.51542e-06	0.000521163	3.46503
TYROBP	ENSG00000011600	protein_coding	0.512386	7.42418e-06	0.000521163	3.47623
TRGVA	ENSG00000225992	TR_V_pseudogene	-0.54372	7.55914e-06	0.00052132	3.45972
CARD11	ENSG00000198286	protein_coding	-0.639037	7.68526e-06	0.000526321	3.44455
HLA-DOA	ENSG00000204252	protein_coding	-0.716161	7.73692e-06	0.000526321	3.43841
KLHDC4	ENSG00000104731	protein_coding	-0.555729	7.66943e-06	0.000526321	3.44644
RAB11FIP3	ENSG00000090565	protein_coding	-0.489331	7.72802e-06	0.000526321	3.43946
MKNK1	ENSG00000079277	protein_coding	0.592669	7.86052e-06	0.000532916	3.42388
OR52W1	ENSG00000175485	protein_coding	0.605416	7.9091e-06	0.000534399	3.41824
REEP6	ENSG00000115255	protein_coding	-0.505758	7.96807e-06	0.00053657	3.41143
PLBD1-AS1	ENSG00000256751	lncRNA	0.647744	8.00601e-06	0.000537316	3.40707
AC079209.1	ENSG00000253214	lncRNA	0.875507	8.06697e-06	0.000539597	3.40012
RP2	ENSG00000102218	protein_coding	0.573861	8.09702e-06	0.000539801	3.39672
LY9	ENSG00000122224	protein_coding	-0.639349	8.13708e-06	0.00054067	3.39219
AL359532.1	ENSG00000272914	lncRNA	0.65135	8.22316e-06	0.000542441	3.38255
ASPSCR1	ENSG00000169696	protein_coding	-0.505469	8.24511e-06	0.000542441	3.38011
MMP23B	ENSG00000189409	protein_coding	-0.636338	8.24442e-06	0.000542441	3.38018
BX640514.2	ENSG00000273812	lncRNA	0.705218	8.33435e-06	0.000546514	3.37024
CR1	ENSG00000203710	protein_coding	0.802034	8.37517e-06	0.000547397	3.36576
EMP1	ENSG00000134531	protein_coding	0.747174	8.436e-06	0.000547947	3.35913
WBP1LP1	ENSG00000243661	processed_pseudogene	-0.581177	8.43838e-06	0.000547947	3.35887
METTL7B	ENSG00000170439	protein_coding	0.978846	8.5335e-06	0.00055233	3.3486
ATG9B	ENSG00000181652	protein_coding	-0.574483	8.58765e-06	0.000554042	3.34281
UBE2D1	ENSG00000072401	protein_coding	0.648487	8.63516e-06	0.000555316	3.33775
CARNS1	ENSG00000172508	protein_coding	-0.715208	8.72552e-06	0.000559328	3.32822
DPYD-AS2	ENSG00000235777	lncRNA	0.636705	8.80701e-06	0.000559957	3.3197
FAR2	ENSG00000064763	protein_coding	0.519262	8.8036e-06	0.000559957	3.32005
RNF151	ENSG00000179580	protein_coding	0.471507	8.81932e-06	0.000559957	3.31842
CNGA4	ENSG00000132259	protein_coding	0.535558	8.91144e-06	0.000560468	3.3089
ITPR3	ENSG00000096433	protein_coding	-0.697538	8.85825e-06	0.000560468	3.31439
RN7SL510P	ENSG00000266308	misc_RNA	-0.475729	8.88643e-06	0.000560468	3.31148
CD5	ENSG00000110448	protein_coding	-0.745098	9.03378e-06	0.000561278	3.29641
PLIN3	ENSG00000105355	protein_coding	0.534068	8.98976e-06	0.000561278	3.30088
SOCS3	ENSG00000184557	protein_coding	1.04825	9.03657e-06	0.000561278	3.29613
UBXN2B	ENSG00000215114	protein_coding	0.537976	8.96702e-06	0.000561278	3.3032
AC005332.4	ENSG00000274712	lncRNA	-0.521104	9.06542e-06	0.000561326	3.29321
AC037459.4	ENSG00000287467	lncRNA	-0.553161	9.20272e-06	0.000562837	3.27944
AC117834.1	ENSG00000253197	lncRNA	0.479759	9.23053e-06	0.000562837	3.27667
CLEC5A	ENSG00000258227	protein_coding	0.850812	9.21316e-06	0.000562837	3.2784
KIF1B	ENSG00000054523	protein_coding	0.622768	9.2203e-06	0.000562837	3.27769
TTC24	ENSG00000187862	protein_coding	-0.665533	9.22115e-06	0.000562837	3.2776
AP005212.2	ENSG00000274214	processed_pseudogene	-0.532954	9.35327e-06	0.000565152	3.26457
NFATC2	ENSG00000101096	protein_coding	-0.685743	9.30115e-06	0.000565152	3.26969
VNN2	ENSG00000112303	protein_coding	0.789724	9.33233e-06	0.000565152	3.26663
MIR4772	ENSG00000264764	miRNA	0.952797	9.453e-06	0.000569458	3.25486
ATP11B	ENSG00000058063	protein_coding	0.5836	9.55906e-06	0.000570688	3.24464
FAHD2CP	ENSG00000231584	transcribed_unprocessed_pseudogene	-0.508282	9.5861e-06	0.000570688	3.24205
GK3P	ENSG00000229894	protein_coding	0.674268	9.58757e-06	0.000570688	3.24191
GPR160	ENSG00000173890	protein_coding	0.622485	9.53142e-06	0.000570688	3.24729
APMAP	ENSG00000101474	protein_coding	0.649038	9.69927e-06	0.000572282	3.23131
CXCR5	ENSG00000160683	protein_coding	-0.718507	9.74481e-06	0.000572282	3.22702
NAIPP1	ENSG00000250687	transcribed_unprocessed_pseudogene	0.831834	9.74559e-06	0.000572282	3.22694
Z95152.1	ENSG00000237719	processed_pseudogene	0.598838	9.69693e-06	0.000572282	3.23153
ZNF135	ENSG00000176293	protein_coding	-0.674743	9.75741e-06	0.000572282	3.22583
ALDH1A2	ENSG00000128918	protein_coding	0.742073	9.84736e-06	0.000575869	3.21743
SLC22A4	ENSG00000197208	protein_coding	0.689375	9.91791e-06	0.000578304	3.21089
ERBB2	ENSG00000141736	protein_coding	-0.60499	9.98759e-06	0.000580674	3.20448
CD59	ENSG00000085063	protein_coding	0.656855	1.00559e-05	0.000582579	3.19824
TLR8	ENSG00000101916	protein_coding	0.63095	1.00786e-05	0.000582579	3.19617
MRPS21P9	ENSG00000262759	processed_pseudogene	-0.553856	1.01564e-05	0.000585386	3.18913
AC019205.1	ENSG00000229852	lncRNA	-0.545532	1.02411e-05	0.000588566	3.18153
AC069431.2	ENSG00000270554	processed_pseudogene	0.578397	1.03402e-05	0.000589832	3.17271
PARP15	ENSG00000173200	protein_coding	-0.609911	1.03211e-05	0.000589832	3.1744
UBQLN4P1	ENSG00000241627	processed_pseudogene	0.872863	1.03515e-05	0.000589832	3.17171
TRAV16	ENSG00000211796	TR_V_gene	-0.675173	1.05001e-05	0.000596598	3.15866
HABP4	ENSG00000130956	protein_coding	-0.513656	1.06229e-05	0.000601864	3.14802
TRBV19	ENSG00000211746	TR_V_gene	-0.793927	1.06697e-05	0.000602806	3.14399
SPN	ENSG00000197471	protein_coding	-0.560213	1.07117e-05	0.000603474	3.1404
PASK	ENSG00000115687	protein_coding	-0.591584	1.08735e-05	0.00061087	3.12667
AL445524.1	ENSG00000233461	lncRNA	0.693537	1.09063e-05	0.000610997	3.12391
AC004825.3	ENSG00000287643	lncRNA	0.499186	1.1039e-05	0.000611619	3.11284
AC005153.1	ENSG00000286658	lncRNA	0.877129	1.09745e-05	0.000611619	3.11821
HPGD	ENSG00000164120	protein_coding	0.841315	1.10144e-05	0.000611619	3.11488
TRBV20-1	ENSG00000211747	TR_V_gene	-0.748219	1.10397e-05	0.000611619	3.11278
NSMF	ENSG00000165802	protein_coding	-0.527489	1.11055e-05	0.000611876	3.10734
QPCT	ENSG00000115828	protein_coding	0.72281	1.10773e-05	0.000611876	3.10967
SH2D3A	ENSG00000125731	protein_coding	-0.562218	1.1202e-05	0.000615493	3.09943
MPRIP	ENSG00000133030	protein_coding	-0.475064	1.12454e-05	0.000616184	3.09589
RAB31	ENSG00000168461	protein_coding	0.551623	1.13591e-05	0.000620714	3.08668
AC245884.11	ENSG00000275210	lncRNA	0.709574	1.15159e-05	0.000625865	3.07413
C5orf30	ENSG00000181751	protein_coding	0.701153	1.15091e-05	0.000625865	3.07467
TMEM177	ENSG00000144120	protein_coding	-0.470643	1.15749e-05	0.000627366	3.06945
ANO9	ENSG00000185101	protein_coding	-0.66632	1.17585e-05	0.000628184	3.05505
APBB1	ENSG00000166313	protein_coding	-0.631991	1.17688e-05	0.000628184	3.05425
BST1	ENSG00000109743	protein_coding	0.539913	1.16415e-05	0.000628184	3.0642
CPE	ENSG00000109472	protein_coding	0.633348	1.16903e-05	0.000628184	3.06038
NAIPP2	ENSG00000179978	unprocessed_pseudogene	0.673687	1.17785e-05	0.000628184	3.0535
PRAG1	ENSG00000275342	protein_coding	-0.705517	1.17389e-05	0.000628184	3.05658
NUDT10	ENSG00000122824	protein_coding	-0.558417	1.20244e-05	0.000637901	3.03458
RNF157-AS1	ENSG00000267128	lncRNA	-0.602926	1.1998e-05	0.000637901	3.0366
CEBPD	ENSG00000221869	protein_coding	0.706038	1.22113e-05	0.000646102	3.02047
AL133410.1	ENSG00000227388	lncRNA	-0.55672	1.23563e-05	0.000646929	3.00967
BCL2A1	ENSG00000140379	protein_coding	0.896448	1.23497e-05	0.000646929	3.01016
BTBD6P1	ENSG00000229106	processed_pseudogene	-0.773036	1.23367e-05	0.000646929	3.01113
THEM4	ENSG00000159445	protein_coding	-0.67681	1.22901e-05	0.000646929	3.01459
AC087854.1	ENSG00000251034	lncRNA	-0.557968	1.24003e-05	0.000647534	3.00642
CARMIL2	ENSG00000159753	protein_coding	-0.746945	1.25068e-05	0.000649702	2.9986
IL24	ENSG00000162892	protein_coding	-0.729743	1.24933e-05	0.000649702	2.99958
ZBTB4	ENSG00000174282	protein_coding	-0.530214	1.25692e-05	0.000651255	2.99404
AC055811.4	ENSG00000278864	TEC	-0.60448	1.27148e-05	0.000653128	2.98351
ADAMTS10	ENSG00000142303	protein_coding	-0.781431	1.27686e-05	0.000653128	2.97964
FAM186B	ENSG00000135436	protein_coding	-0.588346	1.27531e-05	0.000653128	2.98075
LRG1	ENSG00000171236	protein_coding	0.839167	1.27627e-05	0.000653128	2.98007
PAIP2B	ENSG00000124374	protein_coding	-0.615801	1.27686e-05	0.000653128	2.97964
AP3B2	ENSG00000103723	protein_coding	1.12618	1.29062e-05	0.000656803	2.96984
TRAJ3	ENSG00000211886	TR_J_gene	-0.687843	1.2892e-05	0.000656803	2.97084
DYNLT1	ENSG00000146425	protein_coding	0.477865	1.30111e-05	0.000658792	2.96243
NLE1	ENSG00000073536	protein_coding	-0.496803	1.29875e-05	0.000658792	2.96409
AC005392.3	ENSG00000272396	lncRNA	0.893139	1.30959e-05	0.000661407	2.95649
AC093010.2	ENSG00000241490	lncRNA	-0.608624	1.3212e-05	0.00066276	2.94841
ACSL1	ENSG00000151726	protein_coding	0.846343	1.33546e-05	0.00066276	2.93859
LOH12CR2	ENSG00000205791	lncRNA	0.510697	1.32924e-05	0.00066276	2.94287
MCTP2	ENSG00000140563	protein_coding	0.635785	1.32536e-05	0.00066276	2.94554
MDS2	ENSG00000197880	lncRNA	-0.704665	1.33386e-05	0.00066276	2.93969
NQO2	ENSG00000124588	protein_coding	0.61495	1.31724e-05	0.00066276	2.95117
TRBJ1-3	ENSG00000282133	TR_J_gene	-0.647693	1.33024e-05	0.00066276	2.94218
AL359979.1	ENSG00000226601	lncRNA	0.473585	1.34117e-05	0.000663944	2.9347
VSIG4	ENSG00000155659	protein_coding	0.746663	1.35037e-05	0.000666852	2.92844
CCDC71L	ENSG00000253276	protein_coding	0.645192	1.35746e-05	0.000668698	2.92365
AC112253.1	ENSG00000200998	misc_RNA	0.768703	1.37446e-05	0.000673755	2.91227
TTC28	ENSG00000100154	protein_coding	-0.528173	1.37272e-05	0.000673755	2.91343
AC005920.1	ENSG00000247011	lncRNA	-0.529773	1.38335e-05	0.000676456	2.90637
AC012349.1	ENSG00000254254	lncRNA	0.554101	1.39514e-05	0.00067932	2.89861
NOL6	ENSG00000165271	protein_coding	-0.519122	1.396e-05	0.00067932	2.89805
AC106865.2	ENSG00000287216	lncRNA	0.561039	1.40162e-05	0.000680398	2.89437
AC020915.2	ENSG00000268201	lncRNA	-0.486204	1.41093e-05	0.000681611	2.88832
ZBTB46	ENSG00000130584	protein_coding	-0.469857	1.41014e-05	0.000681611	2.88883
AC093752.1	ENSG00000245958	transcribed_unprocessed_pseudogene	0.529433	1.4219e-05	0.000685253	2.88124
AC104211.1	ENSG00000248858	lncRNA	0.587732	1.43421e-05	0.000687888	2.87335
ZNF415P1	ENSG00000266127	processed_pseudogene	0.652526	1.43425e-05	0.000687888	2.87333
ADAMTS3	ENSG00000156140	protein_coding	0.836407	1.44654e-05	0.000692123	2.86553
UST	ENSG00000111962	protein_coding	-0.523654	1.45208e-05	0.000693116	2.86203
BDH1	ENSG00000161267	protein_coding	-0.543376	1.46445e-05	0.000697357	2.85427
LEF1-AS1	ENSG00000232021	lncRNA	-0.893648	1.47421e-05	0.000700339	2.8482
AC003957.1	ENSG00000279825	TEC	-0.682323	1.48399e-05	0.000701648	2.84216
AC087645.2	ENSG00000267737	lncRNA	0.694141	1.48219e-05	0.000701648	2.84327
AL359962.3	ENSG00000287218	lncRNA	-0.799545	1.49122e-05	0.00070175	2.83771
MIR2355	ENSG00000253008	miRNA	0.52072	1.4894e-05	0.00070175	2.83882
AC004554.2	ENSG00000282840	lncRNA	0.657409	1.51009e-05	0.000705648	2.82622
SARM1	ENSG00000004139	protein_coding	-0.532344	1.5076e-05	0.000705648	2.82772
SLC2A3	ENSG00000059804	protein_coding	0.750418	1.50317e-05	0.000705648	2.83041
Z99572.1	ENSG00000213062	lncRNA	0.474746	1.51432e-05	0.000705977	2.82366
AC018742.1	ENSG00000233005	lncRNA	-0.454494	1.52146e-05	0.000707656	2.81936
CROCC	ENSG00000058453	protein_coding	-0.606718	1.53552e-05	0.000709958	2.81095
IL23A	ENSG00000110944	protein_coding	-0.528062	1.54214e-05	0.000709958	2.80702
MCTP1	ENSG00000175471	protein_coding	0.585558	1.54416e-05	0.000709958	2.80582
RALB	ENSG00000144118	protein_coding	0.616979	1.53371e-05	0.000709958	2.81203
ZNF154	ENSG00000179909	protein_coding	-0.690487	1.54009e-05	0.000709958	2.80823
AC020636.2	ENSG00000260234	protein_coding	0.963991	1.57255e-05	0.000718058	2.78917
KCNE1	ENSG00000180509	protein_coding	0.869813	1.56981e-05	0.000718058	2.79076
TRAJ27	ENSG00000211862	TR_J_gene	-0.699987	1.57151e-05	0.000718058	2.78977
NAMPTP1	ENSG00000229644	processed_pseudogene	0.913233	1.57752e-05	0.000718687	2.78628
CLUHP3	ENSG00000131797	transcribed_unprocessed_pseudogene	-0.663185	1.58354e-05	0.00071979	2.7828
MMADHC	ENSG00000168288	protein_coding	0.519605	1.59181e-05	0.000721907	2.77804
PRSS2	ENSG00000275896	protein_coding	-0.631021	1.60002e-05	0.000723991	2.77333
GRB10	ENSG00000106070	protein_coding	0.955971	1.61142e-05	0.000725866	2.76684
IL2RB	ENSG00000100385	protein_coding	-0.928348	1.60911e-05	0.000725866	2.76816
CST7	ENSG00000077984	protein_coding	0.815717	1.61884e-05	0.00072757	2.76264
DDTP1	ENSG00000230683	processed_pseudogene	-0.505562	1.636e-05	0.000733633	2.75301
C1orf159	ENSG00000131591	protein_coding	-0.442634	1.64139e-05	0.000734401	2.75001
CNR2	ENSG00000188822	protein_coding	-0.794545	1.64882e-05	0.000734442	2.74587
TRAJ37	ENSG00000278661	TR_J_gene	-0.70833	1.6465e-05	0.000734442	2.74716
IPO5P1	ENSG00000269837	transcribed_processed_pseudogene	-0.56429	1.65617e-05	0.000734443	2.74181
SHOC1	ENSG00000165181	protein_coding	0.847862	1.65448e-05	0.000734443	2.74274
TRAJ30	ENSG00000211859	TR_J_gene	-0.68629	1.70001e-05	0.000752218	2.71793
S100A8	ENSG00000143546	protein_coding	0.963567	1.70891e-05	0.000752825	2.71316
TPT1P10	ENSG00000180221	processed_pseudogene	0.485401	1.70835e-05	0.000752825	2.71347
CLRN1	ENSG00000163646	protein_coding	1.15961	1.73033e-05	0.000758916	2.70178
TRAJ50	ENSG00000211839	TR_J_gene	-0.643144	1.72935e-05	0.000758916	2.7023
ALOX5AP	ENSG00000132965	protein_coding	0.73771	1.76477e-05	0.000768964	2.68377
MIR5690	ENSG00000265527	miRNA	0.83162	1.75974e-05	0.000768964	2.68638
SARDH	ENSG00000123453	protein_coding	-0.681402	1.76152e-05	0.000768964	2.68546
DDX51	ENSG00000185163	protein_coding	-0.525305	1.78862e-05	0.000774296	2.67151
FBXL5	ENSG00000118564	protein_coding	0.596494	1.78255e-05	0.000774296	2.67462
MTND6P5	ENSG00000227730	unprocessed_pseudogene	0.554797	1.7864e-05	0.000774296	2.67265
TXN	ENSG00000136810	protein_coding	0.659199	1.81202e-05	0.000782731	2.65964
HAUS4	ENSG00000092036	protein_coding	0.57084	1.82923e-05	0.000784681	2.651
MROCKI	ENSG00000227502	lncRNA	0.67895	1.8276e-05	0.000784681	2.65182
NMRAL2P	ENSG00000171658	transcribed_unprocessed_pseudogene	0.8107	1.83223e-05	0.000784681	2.6495
TRBJ2-6	ENSG00000211770	TR_J_gene	-0.6103	1.82859e-05	0.000784681	2.65132
LINC00861	ENSG00000245164	lncRNA	-0.760664	1.84154e-05	0.000786982	2.64487
AC138932.1	ENSG00000183458	transcribed_unprocessed_pseudogene	-0.63074	1.86349e-05	0.000794664	2.63405
CLVS1	ENSG00000177182	protein_coding	0.555992	1.87788e-05	0.000799097	2.62702
SBK1	ENSG00000188322	protein_coding	-0.86644	1.89585e-05	0.000803327	2.61832
SRGN	ENSG00000122862	protein_coding	0.664985	1.89504e-05	0.000803327	2.61872
CLEC4E	ENSG00000166523	protein_coding	0.817668	1.92564e-05	0.000811854	2.60408
DIP2C	ENSG00000151240	protein_coding	-0.641749	1.93221e-05	0.000811854	2.60097
ITGA7	ENSG00000135424	protein_coding	0.96323	1.92663e-05	0.000811854	2.60362
LINC02210	ENSG00000204650	transcribed_unitary_pseudogene	-0.556283	1.92839e-05	0.000811854	2.60278
TBC1D8	ENSG00000204634	protein_coding	0.494794	1.93748e-05	0.000812362	2.59848
ABLIM2	ENSG00000163995	protein_coding	-0.556647	1.94587e-05	0.000814173	2.59454
AC092329.4	ENSG00000284428	lncRNA	-0.537989	1.96632e-05	0.000816029	2.58499
AC243960.1	ENSG00000268027	lncRNA	-0.643984	1.96663e-05	0.000816029	2.58485
P2RY1	ENSG00000169860	protein_coding	0.493249	1.95848e-05	0.000816029	2.58864
TMCO3	ENSG00000150403	protein_coding	0.486765	1.96201e-05	0.000816029	2.587
OBSCN	ENSG00000154358	protein_coding	-0.731642	1.98572e-05	0.000822244	2.57603
IGSF9B	ENSG00000080854	protein_coding	-0.779168	2.00459e-05	0.000826635	2.56739
ZFYVE28	ENSG00000159733	protein_coding	-0.594435	2.00091e-05	0.000826635	2.56907
SIDT1-AS1	ENSG00000239453	lncRNA	-0.552697	2.01174e-05	0.000827876	2.56414
AC114878.1	ENSG00000230718	processed_pseudogene	0.549754	2.02651e-05	0.000828085	2.55746
AL109615.4	ENSG00000287562	lncRNA	-0.468667	2.02505e-05	0.000828085	2.55812
TRMT9B	ENSG00000250305	protein_coding	0.533401	2.02113e-05	0.000828085	2.55989
WNT10B	ENSG00000169884	protein_coding	-0.57942	2.02881e-05	0.000828085	2.55642
CCL28	ENSG00000151882	protein_coding	-0.53795	2.04971e-05	0.000828166	2.54706
MIR4451	ENSG00000266421	miRNA	0.511483	2.0484e-05	0.000828166	2.54765
MS4A6A	ENSG00000110077	protein_coding	0.454797	2.04856e-05	0.000828166	2.54758
PRSS3P1	ENSG00000250591	unprocessed_pseudogene	-0.619355	2.04192e-05	0.000828166	2.55054
RNF144B	ENSG00000137393	protein_coding	0.584621	2.04642e-05	0.000828166	2.54853
LRRN1	ENSG00000175928	protein_coding	0.694855	2.06285e-05	0.000831794	2.54123
AL359962.1	ENSG00000233411	lncRNA	-0.553048	2.09969e-05	0.000843684	2.52507
HSPA1B	ENSG00000204388	protein_coding	0.58799	2.10077e-05	0.000843684	2.5246
SAP30	ENSG00000164105	protein_coding	0.644375	2.1375e-05	0.000856712	2.50878
AC114490.3	ENSG00000284773	protein_coding	-0.46266	2.16695e-05	0.000865055	2.49628
RN7SL405P	ENSG00000264540	misc_RNA	-0.461695	2.16696e-05	0.000865055	2.49628
ST6GALNAC6	ENSG00000160408	protein_coding	-0.602712	2.24122e-05	0.000892917	2.46552
NSUN7	ENSG00000179299	protein_coding	0.764783	2.25579e-05	0.000895155	2.45961
PFAS	ENSG00000178921	protein_coding	-0.461332	2.25329e-05	0.000895155	2.46062
FNDC3B	ENSG00000075420	protein_coding	0.468993	2.28448e-05	0.000904744	2.44807
AC103563.2	ENSG00000231062	lncRNA	-0.646947	2.32009e-05	0.00091493	2.43396
AL132780.1	ENSG00000257285	lncRNA	0.587736	2.31619e-05	0.00091493	2.43549
TCF7	ENSG00000081059	protein_coding	-0.689593	2.32392e-05	0.00091493	2.43245
NAMPT	ENSG00000105835	protein_coding	0.783835	2.33455e-05	0.000917308	2.42829
AC007556.1	ENSG00000235321	lncRNA	0.81095	2.35744e-05	0.00091977	2.41939
LEF1	ENSG00000138795	protein_coding	-0.844407	2.35129e-05	0.00091977	2.42177
TMSB15B	ENSG00000158427	protein_coding	-0.508352	2.34843e-05	0.00091977	2.42288
TMSB15B	ENSG00000269226	protein_coding	-0.508352	2.34843e-05	0.00091977	2.42288
ZNF30	ENSG00000168661	protein_coding	-0.563797	2.35921e-05	0.00091977	2.4187
AC027279.2	ENSG00000261537	lncRNA	-0.565537	2.37947e-05	0.000924617	2.4109
PHACTR3	ENSG00000087495	protein_coding	0.537977	2.38089e-05	0.000924617	2.41035
GCA	ENSG00000115271	protein_coding	0.767276	2.40965e-05	0.000932167	2.3994
TRBJ1-2	ENSG00000282420	TR_J_gene	-0.620582	2.40632e-05	0.000932167	2.40066
MAP4K1	ENSG00000104814	protein_coding	-0.651016	2.42766e-05	0.000935514	2.3926
SLC26A8	ENSG00000112053	protein_coding	0.786409	2.42441e-05	0.000935514	2.39382
AC243960.7	ENSG00000280014	TEC	-0.610868	2.44873e-05	0.000941818	2.38472
AL162586.1	ENSG00000225032	lncRNA	-0.708991	2.46704e-05	0.000945019	2.37792
FAM32BP	ENSG00000203416	processed_pseudogene	-0.523522	2.46888e-05	0.000945019	2.37724
PHLDB3	ENSG00000176531	protein_coding	-0.464901	2.47122e-05	0.000945019	2.37638
GGT7	ENSG00000131067	protein_coding	-0.525232	2.47652e-05	0.000945236	2.37442
MKNK1-AS1	ENSG00000269956	lncRNA	0.584738	2.48427e-05	0.000946388	2.37157
LINC01801	ENSG00000267767	lncRNA	-0.621446	2.49352e-05	0.000948105	2.36818
AL137058.2	ENSG00000273784	lncRNA	-0.498172	2.52355e-05	0.00095751	2.35726
F5	ENSG00000198734	protein_coding	0.68172	2.52783e-05	0.00095751	2.35572
AL161757.2	ENSG00000258428	lncRNA	0.48683	2.53269e-05	0.000957539	2.35396
RPL7P18	ENSG00000243806	processed_pseudogene	0.734602	2.54084e-05	0.000958808	2.35103
DPH1	ENSG00000108963	protein_coding	-0.489929	2.56509e-05	0.000966134	2.34237
TRAJ38	ENSG00000211851	TR_J_gene	-0.716653	2.57298e-05	0.000967286	2.33957
SYCP2	ENSG00000196074	protein_coding	0.617954	2.64744e-05	0.000993412	2.31355
IPMK	ENSG00000151151	protein_coding	0.551005	2.68271e-05	0.00099729	2.30148
MGAM2	ENSG00000257743	protein_coding	0.97973	2.67689e-05	0.00099729	2.30346
NAA40	ENSG00000110583	protein_coding	-0.515786	2.67664e-05	0.00099729	2.30354
PCNX2	ENSG00000135749	protein_coding	-0.533276	2.66362e-05	0.00099729	2.30799
TMEM204	ENSG00000131634	protein_coding	-0.731417	2.68197e-05	0.00099729	2.30173
AC093752.2	ENSG00000250950	lncRNA	0.518167	2.69178e-05	0.000998806	2.2984
LONRF3	ENSG00000175556	protein_coding	0.535464	2.70189e-05	0.0010007	2.29498
SELL	ENSG00000188404	protein_coding	0.58302	2.70748e-05	0.00100092	2.29309
ITK	ENSG00000113263	protein_coding	-0.66479	2.71538e-05	0.00100199	2.29044
ZNF281	ENSG00000162702	protein_coding	0.507253	2.72129e-05	0.00100232	2.28845
ATP8B2	ENSG00000143515	protein_coding	-0.587901	2.75666e-05	0.00101348	2.27668
MSH2-OT1	ENSG00000235760	lncRNA	-0.444409	2.79123e-05	0.00102431	2.26531
SCRG1	ENSG00000164106	protein_coding	0.617817	2.82147e-05	0.00103351	2.25549
AC079781.3	ENSG00000232097	processed_pseudogene	-0.503223	2.86928e-05	0.0010491	2.24017
AC022966.1	ENSG00000055483	protein_coding	-0.514278	2.87706e-05	0.00105002	2.2377
AL034550.2	ENSG00000277301	lncRNA	-0.655404	2.90134e-05	0.00105145	2.23004
CYB5RL	ENSG00000215883	protein_coding	-0.552293	2.91063e-05	0.00105145	2.22713
IFI16	ENSG00000163565	protein_coding	0.493118	2.90785e-05	0.00105145	2.228
LRIG1	ENSG00000144749	protein_coding	-0.482502	2.91253e-05	0.00105145	2.22653
MTND3P12	ENSG00000259626	processed_pseudogene	0.702375	2.89531e-05	0.00105145	2.23194
TRAJ39	ENSG00000211850	TR_J_gene	-0.650927	2.90919e-05	0.00105145	2.22758
SH2D1B	ENSG00000198574	protein_coding	-0.740687	2.92373e-05	0.0010536	2.22303
NMT2	ENSG00000152465	protein_coding	-0.497593	2.93579e-05	0.00105604	2.21928
APBA2	ENSG00000034053	protein_coding	-0.665298	2.94377e-05	0.00105701	2.21681
CCPG1	ENSG00000260916	protein_coding	0.475577	2.9542e-05	0.00105885	2.21358
IFFO2	ENSG00000169991	protein_coding	-0.452807	2.98775e-05	0.00106896	2.20329
AC022784.5	ENSG00000254340	lncRNA	0.606756	3.01161e-05	0.00106984	2.19604
PRR5L	ENSG00000135362	protein_coding	-0.602921	2.99584e-05	0.00106984	2.20082
STARD9	ENSG00000159433	protein_coding	-0.595453	3.00163e-05	0.00106984	2.19906
ZNF853	ENSG00000236609	protein_coding	-0.605264	3.00725e-05	0.00106984	2.19736
MAGEE1	ENSG00000198934	protein_coding	-0.563487	3.03788e-05	0.00107565	2.18812
ZNF549	ENSG00000121406	protein_coding	-0.485881	3.0387e-05	0.00107565	2.18787
AC233976.2	ENSG00000287767	lncRNA	-0.640333	3.09756e-05	0.00109229	2.17039
AL035661.1	ENSG00000274173	lncRNA	1.13359	3.10211e-05	0.00109229	2.16905
IFITM2	ENSG00000185201	protein_coding	0.719158	3.09517e-05	0.00109229	2.17109
PIK3C2B	ENSG00000133056	protein_coding	-0.637611	3.11673e-05	0.00109348	2.16476
PLXNC1	ENSG00000136040	protein_coding	0.546629	3.12735e-05	0.00109348	2.16167
SIGLEC5	ENSG00000105501	protein_coding	0.6636	3.12385e-05	0.00109348	2.16269
TRBC2	ENSG00000211772	TR_C_gene	-0.705432	3.12109e-05	0.00109348	2.16349
CXXC5-AS1	ENSG00000250635	lncRNA	-0.465297	3.14008e-05	0.00109601	2.15796
SAT1	ENSG00000130066	protein_coding	0.528933	3.14914e-05	0.00109726	2.15534
AC068700.1	ENSG00000260398	lncRNA	-0.474363	3.17418e-05	0.00110384	2.14812
MYBBP1A	ENSG00000132382	protein_coding	-0.5432	3.17905e-05	0.00110384	2.14673
TBX21	ENSG00000073861	protein_coding	-0.750333	3.18988e-05	0.00110568	2.14362
AL163932.1	ENSG00000259097	lncRNA	-0.693584	3.24043e-05	0.00111739	2.1293
KCNS2	ENSG00000156486	protein_coding	0.534801	3.22975e-05	0.00111739	2.13231
WDFY3-AS2	ENSG00000180769	lncRNA	0.597921	3.23778e-05	0.00111739	2.13004
LINC01215	ENSG00000271856	lncRNA	-0.579972	3.24775e-05	0.00111798	2.12724
CARD16	ENSG00000204397	protein_coding	0.584571	3.26279e-05	0.00112123	2.12303
SMPDL3A	ENSG00000172594	protein_coding	0.609997	3.27237e-05	0.0011226	2.12036
AC066616.2	ENSG00000259600	processed_pseudogene	0.721013	3.3007e-05	0.00113038	2.11251
ATP10A	ENSG00000206190	protein_coding	-0.61858	3.30796e-05	0.00113093	2.11051
LINC01237	ENSG00000233806	lncRNA	-0.589796	3.31754e-05	0.00113227	2.10787
AL645568.2	ENSG00000231615	processed_pseudogene	0.515648	3.34476e-05	0.00113767	2.10042
GPA33	ENSG00000143167	protein_coding	-0.696697	3.33998e-05	0.00113767	2.10173
AZI2	ENSG00000163512	protein_coding	0.462114	3.3569e-05	0.00113986	2.09713
AUTS2	ENSG00000158321	protein_coding	-0.578335	3.37589e-05	0.00114369	2.09199
EEF2K	ENSG00000103319	protein_coding	-0.545856	3.37961e-05	0.00114369	2.09098
ABCG5	ENSG00000138075	protein_coding	0.516103	3.40267e-05	0.00114568	2.08479
LMNB1	ENSG00000113368	protein_coding	0.649901	3.39625e-05	0.00114568	2.08651
OR10V3P	ENSG00000254743	unprocessed_pseudogene	0.458695	3.40054e-05	0.00114568	2.08536
SLC37A3	ENSG00000157800	protein_coding	0.657626	3.42952e-05	0.00115278	2.07763
CD40LG	ENSG00000102245	protein_coding	-0.530348	3.44753e-05	0.00115661	2.07286
NPIPB11	ENSG00000254206	protein_coding	-0.522447	3.45248e-05	0.00115661	2.07155
CA4	ENSG00000167434	protein_coding	0.834209	3.47114e-05	0.00115898	2.06664
CKMT2-AS1	ENSG00000247572	lncRNA	-0.465203	3.47038e-05	0.00115898	2.06684
ZNF512B	ENSG00000196700	protein_coding	-0.600948	3.49327e-05	0.00116442	2.06085
SLC16A6	ENSG00000108932	protein_coding	0.44784	3.51274e-05	0.00116896	2.05579
AC007298.1	ENSG00000257715	lncRNA	0.46379	3.52707e-05	0.00117178	2.05208
ARHGAP24	ENSG00000138639	protein_coding	0.490782	3.5437e-05	0.00117536	2.0478
CD3E	ENSG00000198851	protein_coding	-0.746277	3.56296e-05	0.00117784	2.04286
RPL7P11	ENSG00000234619	processed_pseudogene	-0.512067	3.55745e-05	0.00117784	2.04427
AMIGO1	ENSG00000181754	protein_coding	-0.578701	3.58811e-05	0.00118419	2.03645
NR3C2	ENSG00000151623	protein_coding	-0.746272	3.61381e-05	0.00119071	2.02995
RNU6-1262P	ENSG00000252026	snRNA	-0.481789	3.63409e-05	0.00119542	2.02486
RUNX3	ENSG00000020633	protein_coding	-0.667004	3.64429e-05	0.00119681	2.02231
TARBP1	ENSG00000059588	protein_coding	-0.488586	3.66395e-05	0.00120129	2.01741
EXOC6	ENSG00000138190	protein_coding	0.567725	3.68509e-05	0.00120279	2.01217
GPRASP1	ENSG00000198932	protein_coding	-0.634737	3.69106e-05	0.00120279	2.01069
MDC1	ENSG00000137337	protein_coding	-0.493035	3.69095e-05	0.00120279	2.01072
STOM	ENSG00000148175	protein_coding	0.649249	3.69258e-05	0.00120279	2.01032
CCR12P	ENSG00000238241	transcribed_unprocessed_pseudogene	-0.754059	3.71396e-05	0.00120692	2.00506
MTCYBP35	ENSG00000251340	processed_pseudogene	0.537297	3.71732e-05	0.00120692	2.00424
TRBV18	ENSG00000276557	TR_V_gene	-0.639108	3.72935e-05	0.00120887	2.00129
AGTPBP1	ENSG00000135049	protein_coding	0.492854	3.737e-05	0.00120939	1.99943
ZXDA	ENSG00000198205	protein_coding	-0.454439	3.77719e-05	0.00122042	1.98969
AQP9	ENSG00000103569	protein_coding	0.717006	3.81704e-05	0.0012313	1.98013
SIGIRR	ENSG00000185187	protein_coding	-0.439997	3.84041e-05	0.00123685	1.97458
TP53	ENSG00000141510	protein_coding	-0.476198	3.84814e-05	0.00123734	1.97275
GALNT14	ENSG00000158089	protein_coding	0.911898	3.87478e-05	0.00124143	1.96646
ST20	ENSG00000180953	protein_coding	0.542223	3.87792e-05	0.00124143	1.96573
TMIGD3	ENSG00000121933	protein_coding	0.978796	3.87948e-05	0.00124143	1.96536
TRBV10-3	ENSG00000275791	TR_V_gene	-0.692158	3.8903e-05	0.00124291	1.96282
AC005041.4	ENSG00000286623	lncRNA	-0.411227	3.91781e-05	0.00124573	1.95641
TET2-AS1	ENSG00000251586	lncRNA	0.475335	3.91376e-05	0.00124573	1.95735
TRAF1	ENSG00000056558	protein_coding	-0.520102	3.91541e-05	0.00124573	1.95697
CCDC88C	ENSG00000015133	protein_coding	-0.455378	3.93777e-05	0.00125009	1.95178
AC021594.1	ENSG00000266924	lncRNA	0.522897	3.94883e-05	0.0012505	1.94923
MTF1	ENSG00000188786	protein_coding	0.48878	3.95157e-05	0.0012505	1.9486
CACNA2D2	ENSG00000007402	protein_coding	-0.55779	3.98059e-05	0.00125769	1.94194
AC008555.4	ENSG00000271109	lncRNA	-0.602465	4.0025e-05	0.00125947	1.93694
IDI1	ENSG00000067064	protein_coding	0.64064	4.00479e-05	0.00125947	1.93642
TRBJ1-4	ENSG00000281958	TR_J_gene	-0.624169	4.00513e-05	0.00125947	1.93635
ARL10	ENSG00000175414	protein_coding	-0.53934	4.015e-05	0.0012606	1.9341
ALOX15P1	ENSG00000274114	transcribed_unprocessed_pseudogene	-0.529158	4.03072e-05	0.00126355	1.93055
BIN1	ENSG00000136717	protein_coding	-0.564781	4.04901e-05	0.00126729	1.92643
ZNF831	ENSG00000124203	protein_coding	-0.63807	4.08438e-05	0.00127637	1.91851
AL356274.2	ENSG00000279511	TEC	0.782744	4.10702e-05	0.00127945	1.91348
LINC002481	ENSG00000246526	lncRNA	-0.572108	4.10293e-05	0.00127945	1.91439
LINC01579	ENSG00000258754	lncRNA	0.876622	4.12454e-05	0.00128164	1.9096
SNHG4	ENSG00000281398	lncRNA	-0.463786	4.12688e-05	0.00128164	1.90909
PIGL	ENSG00000108474	protein_coding	-0.554774	4.14808e-05	0.00128623	1.90442
IFNGR2	ENSG00000159128	protein_coding	0.471759	4.17952e-05	0.00129397	1.89755
AL353743.4	ENSG00000234424	unprocessed_pseudogene	0.477729	4.19009e-05	0.00129524	1.89525
ECHDC2	ENSG00000121310	protein_coding	-0.565356	4.22502e-05	0.00130402	1.8877
MTA1	ENSG00000182979	protein_coding	-0.479765	4.24284e-05	0.0013075	1.88387
AL359220.1	ENSG00000247287	lncRNA	-0.62671	4.25792e-05	0.00131013	1.88064
AL031280.1	ENSG00000233478	lncRNA	-0.714398	4.27837e-05	0.0013144	1.87628
SCN9A	ENSG00000169432	protein_coding	0.785207	4.31082e-05	0.00132234	1.86941
RNF157	ENSG00000141576	protein_coding	-0.629675	4.33373e-05	0.00132733	1.86458
TRBV6-7	ENSG00000253188	TR_V_gene	-0.514	4.34694e-05	0.00132934	1.86181
AL160313.2	ENSG00000247970	lncRNA	-0.506402	4.37434e-05	0.00133567	1.8561
ASAH1	ENSG00000104763	protein_coding	0.453041	4.44381e-05	0.0013507	1.84176
GOLGA8VP	ENSG00000259236	unprocessed_pseudogene	-0.499927	4.43485e-05	0.0013507	1.8436
MARCHF3	ENSG00000173926	protein_coding	0.592098	4.44161e-05	0.0013507	1.84221
AC107464.3	ENSG00000272927	lncRNA	-0.494178	4.45593e-05	0.00135233	1.83928
LMF1	ENSG00000103227	protein_coding	-0.510872	4.47137e-05	0.00135496	1.83614
BCL7A	ENSG00000110987	protein_coding	-0.62926	4.48417e-05	0.00135507	1.83354
CA6	ENSG00000131686	protein_coding	-0.790735	4.48527e-05	0.00135507	1.83331
AC007496.2	ENSG00000261630	lncRNA	-0.483284	4.56753e-05	0.00136369	1.81678
FPR2	ENSG00000171049	protein_coding	0.645677	4.5592e-05	0.00136369	1.81844
MTARC1	ENSG00000186205	protein_coding	0.69255	4.54579e-05	0.00136369	1.82112
MTX1	ENSG00000173171	protein_coding	0.521126	4.5713e-05	0.00136369	1.81603
NUDT16	ENSG00000198585	protein_coding	0.55151	4.55991e-05	0.00136369	1.8183
SLC22A15	ENSG00000163393	protein_coding	0.531259	4.54367e-05	0.00136369	1.82154
TAS2R38	ENSG00000257138	protein_coding	0.589707	4.55498e-05	0.00136369	1.81928
TLR8-AS1	ENSG00000233338	lncRNA	0.534596	4.57516e-05	0.00136369	1.81526
TRBJ2-5	ENSG00000211769	TR_J_gene	-0.505094	4.54175e-05	0.00136369	1.82193
KIAA0825	ENSG00000185261	protein_coding	0.628458	4.58492e-05	0.00136456	1.81332
CACNA1C-AS1	ENSG00000246627	lncRNA	-0.518054	4.60025e-05	0.00136501	1.81029
COL6A2	ENSG00000142173	protein_coding	-0.747393	4.60381e-05	0.00136501	1.80958
RHOG	ENSG00000177105	protein_coding	0.480467	4.6069e-05	0.00136501	1.80897
AL078600.1	ENSG00000287100	lncRNA	0.540765	4.63252e-05	0.00136652	1.80393
C3orf86	ENSG00000225873	transcribed_unitary_pseudogene	0.770859	4.62132e-05	0.00136652	1.80613
EDNRB	ENSG00000136160	protein_coding	0.620833	4.63235e-05	0.00136652	1.80396
AC099811.1	ENSG00000236194	lncRNA	0.462109	4.64603e-05	0.00136849	1.80128
AL590068.3	ENSG00000285630	lncRNA	0.459334	4.7407e-05	0.00139432	1.78293
SRPK1	ENSG00000096063	protein_coding	0.576207	4.75265e-05	0.00139579	1.78064
AC010731.2	ENSG00000213083	processed_pseudogene	0.596449	4.79863e-05	0.00140722	1.77189
RPAP1	ENSG00000103932	protein_coding	-0.531578	4.8281e-05	0.00141379	1.76632
PIK3AP1	ENSG00000155629	protein_coding	0.491245	4.84353e-05	0.00141587	1.76342
PTGFR	ENSG00000122420	protein_coding	0.888312	4.84935e-05	0.00141587	1.76233
LBH	ENSG00000213626	protein_coding	-0.525132	4.85988e-05	0.00141687	1.76035
AP001020.3	ENSG00000266171	lncRNA	-0.493575	4.90099e-05	0.00142353	1.75269
GNS	ENSG00000135677	protein_coding	0.439969	4.90206e-05	0.00142353	1.7525
RAB5IF	ENSG00000101084	protein_coding	0.435808	4.91353e-05	0.00142353	1.75037
SMAD3	ENSG00000166949	protein_coding	-0.465966	4.90832e-05	0.00142353	1.75134
TAS2R39	ENSG00000236398	protein_coding	0.75871	4.9183e-05	0.00142353	1.74949
AC022692.1	ENSG00000201724	misc_RNA	0.506043	4.96813e-05	0.00143588	1.74032
TAS2R40	ENSG00000221937	protein_coding	0.882589	4.98477e-05	0.00143861	1.73728
AC010210.1	ENSG00000250608	lncRNA	0.594777	5.0433e-05	0.00144957	1.72667
AC020636.1	ENSG00000243273	lncRNA	0.881364	5.0445e-05	0.00144957	1.72645
AC027682.7	ENSG00000280214	TEC	-0.490252	5.03415e-05	0.00144957	1.72832
CEBPB	ENSG00000172216	protein_coding	0.57121	5.07847e-05	0.00145515	1.72035
RASGRP1	ENSG00000172575	protein_coding	-0.586177	5.07838e-05	0.00145515	1.72037
AC008957.3	ENSG00000279400	TEC	0.795597	5.09414e-05	0.00145755	1.71755
RCAN3	ENSG00000117602	protein_coding	-0.636317	5.1363e-05	0.00146751	1.71006
CLRN1-AS1	ENSG00000239265	lncRNA	0.894043	5.14828e-05	0.00146884	1.70794
RNU6-331P	ENSG00000207455	snRNA	0.464882	5.17677e-05	0.00147486	1.70292
SAMD10	ENSG00000130590	protein_coding	-0.464512	5.19099e-05	0.00147669	1.70043
SMAD1	ENSG00000170365	protein_coding	0.46404	5.19796e-05	0.00147669	1.69921
CMTM6	ENSG00000091317	protein_coding	0.487862	5.20828e-05	0.00147753	1.69741
BMX	ENSG00000102010	protein_coding	0.943429	5.23614e-05	0.00148333	1.69256
MS4A4A	ENSG00000110079	protein_coding	0.769771	5.24672e-05	0.00148422	1.69072
ZNF663P	ENSG00000215452	transcribed_unitary_pseudogene	0.481577	5.28679e-05	0.00149344	1.68381
CAPZA1	ENSG00000116489	protein_coding	0.477631	5.31807e-05	0.00149609	1.67844
CCDC141	ENSG00000163492	protein_coding	-0.747045	5.3186e-05	0.00149609	1.67835
DHRS3	ENSG00000162496	protein_coding	-0.511527	5.30489e-05	0.00149609	1.6807
ZNF827	ENSG00000151612	protein_coding	-0.609702	5.33548e-05	0.00149873	1.67547
SLPI	ENSG00000124107	protein_coding	0.896298	5.35087e-05	0.00150095	1.67285
AL357874.2	ENSG00000231393	lncRNA	-0.481842	5.46725e-05	0.0015293	1.6533
CPD	ENSG00000108582	protein_coding	0.564078	5.46049e-05	0.0015293	1.65442
CCR7	ENSG00000126353	protein_coding	-0.792901	5.49977e-05	0.00153625	1.64791
SDHAF3	ENSG00000196636	protein_coding	0.511181	5.51957e-05	0.00153749	1.64464
ZNF750	ENSG00000141579	protein_coding	-0.566742	5.51729e-05	0.00153749	1.64502
AC135626.2	ENSG00000287328	unprocessed_pseudogene	0.558034	5.53796e-05	0.00153832	1.64162
PPP1R16B	ENSG00000101445	protein_coding	-0.518263	5.53329e-05	0.00153832	1.64239
CD247	ENSG00000198821	protein_coding	-0.628847	5.6048e-05	0.00154829	1.63072
CKAP4	ENSG00000136026	protein_coding	0.612322	5.59645e-05	0.00154829	1.63207
FAM240C	ENSG00000216921	protein_coding	-0.572893	5.59824e-05	0.00154829	1.63178
RTN3	ENSG00000133318	protein_coding	0.46695	5.59323e-05	0.00154829	1.6326
AC021028.1	ENSG00000226659	lncRNA	-0.465192	5.62315e-05	0.00154884	1.62775
AC092953.2	ENSG00000273261	lncRNA	0.452975	5.63003e-05	0.00154884	1.62664
PLEKHB1	ENSG00000021300	protein_coding	-0.521562	5.62901e-05	0.00154884	1.6268
C19orf38	ENSG00000214212	protein_coding	0.467801	5.64672e-05	0.0015513	1.62395
AC009656.1	ENSG00000255060	lncRNA	-0.558437	5.69526e-05	0.00156034	1.61617
GOLGA2P5	ENSG00000238105	transcribed_unprocessed_pseudogene	-0.48217	5.69168e-05	0.00156034	1.61674
SPATA13-AS1	ENSG00000227213	lncRNA	-0.544891	5.70863e-05	0.00156187	1.61404
SIRPD	ENSG00000125900	protein_coding	0.482752	5.7193e-05	0.00156265	1.61234
NAP1L4P1	ENSG00000177173	processed_pseudogene	0.468051	5.74501e-05	0.00156753	1.60827
ADGRG5	ENSG00000159618	protein_coding	-0.767897	5.77234e-05	0.00157284	1.60396
LAT	ENSG00000213658	protein_coding	-0.676868	5.78836e-05	0.00157292	1.60144
ZFP41	ENSG00000181638	protein_coding	-0.474911	5.78788e-05	0.00157292	1.60151
ADGRD1	ENSG00000111452	protein_coding	-0.622277	5.80328e-05	0.00157484	1.5991
SEMA6B	ENSG00000167680	protein_coding	0.673432	5.82981e-05	0.00157989	1.59496
JDP2	ENSG00000140044	protein_coding	0.53917	5.86235e-05	0.00158656	1.5899
C2CD4D	ENSG00000225556	protein_coding	-0.515116	5.8831e-05	0.00159003	1.58669
HCN2	ENSG00000099822	protein_coding	-0.451279	5.90744e-05	0.00159445	1.58294
AC103996.2	ENSG00000258831	lncRNA	0.867077	5.96661e-05	0.00160177	1.57389
[truncated: 19,269 more rows]

## Sheet: S file 1H
Supplementary file 1H – Differential expression analysis for whole transcriptome between death (n=27) and survival (n=45) in HIV-positive TBM in the study. Positive log fold change (logFC) indicates higher expression, while negative logFC indicates lower expression in death TBM. Two cases were excluded from this analysis due to follow-up time were less than 3 months. Linear models were used to as…
[truncated: 20,013 more rows]

[truncated: 5 more sheets: S file 1I, S file 1J, S file 1K, S file 1L, S file 1M]
